# Supplementary material for: Rhodium-catalyzed N -alkenylation of ketimines: one-pot synthesis of polysubstituted pyrroles
Source: Royal Society of Chemistry journal article supplement (doi:10.1039/d4qo01483a), 2024-01-01

# **Rhodium-Catalyzed *N*-alkenylation of Ketimines : One- Pot Synthesis of Polysubstituted Pyrroles**

## **Supporting Information**

Xue-Wei Qian and Xing-Wen Sun\*

Department of Chemistry, Fudan University, 220 Handan Road, 200433, Shanghai, China

*E-mail:* sunxingwen@fudan.edu.cn

## Table of Contents

|                                                                      |    |
|----------------------------------------------------------------------|----|
| 1. General experimental information.....                             | 3  |
| 2. Typical procedure for the synthesis of the ketimines .....        | 4  |
| 3. Typical procedure for <i>N</i> -alkenylation.....                 | 9  |
| 4. Typical procedure for the synthesis of pyrroles .....             | 17 |
| 5. Typical procedures for the synthesis of <b>5a</b> .....           | 25 |
| 6. Typical procedures for the synthesis of <b>5b</b> .....           | 26 |
| 7. Typical procedures for the synthesis of <b>Lamellarin R</b> ..... | 27 |
| 8. Proposed mechanism for the reaction.....                          | 28 |
| 9. <b>NMR</b> spectra.....                                           | 29 |

## 1. General experimental information

Unless otherwise noted, all reagents were purchased from commercial sources and were used without further purification. The solvents were purified and dried according to standard methods prior to use. Imine were prepared based on literature procedures, respectively. The  $^1\text{H NMR}$  spectra were recorded at 400 MHz. The  $^{13}\text{C NMR}$  spectra were recorded at 101 MHz. The  $^{19}\text{F NMR}$  spectra were recorded at 376 MHz. Chemical shifts were expressed in parts per million ( $\delta$ ), and were reported as s (singlet), d (doublet), t (triplet), dd (doublet of doublets), m (multiplet), br s (broad singlet), etc. Chemical shifts are reported in  $\delta$  ppm referenced to an internal SiMe<sub>4</sub> standard for  $^1\text{H NMR}$  and chloroform-d ( $\delta$  77.0) for  $^{13}\text{C NMR}$ . **HRMS** was measured on Bruker micrOTOF II serial 10257. **HPLC** was performed on an Agilent 1100 series instrument uv/vis detector by using Daicel Chiracel AD-H column. Flash column chromatography was performed using silica gel (300 - 400 mesh). Analytical thin-layer chromatography was performed using glass plates pre-coated with 0.25 mm 300 - 400 mesh silica gel impregnated with a fluorescent indicator (254 nm). Thin layer chromatography plates were visualized by exposure to ultraviolet light. Commercial reagents were used as received.

## 2. Typical procedure for the synthesis of the ketimines:

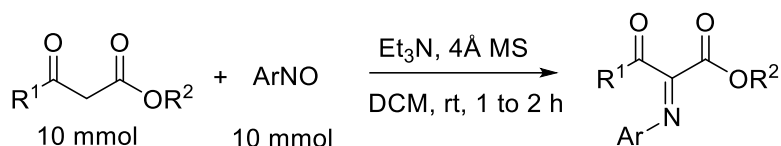

The  $\beta$ -dicarbonyl compound (10 mmol, 1.0 equiv), nitrosobenzene (10 mmol, 1.0 equiv.) and 1 g 4ÅMS were dissolved in 5 mL of dry dichloromethane at rt (25 °C). Then Et<sub>3</sub>N (1 mmol, 10% equiv) was added. The reaction mixture was stirred for 2 h at rt. The crude reaction mixture was purified by flash chromatography to afford the desired ketimine.

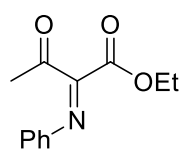

**Ethyl (*E*)-3-oxo-2-(phenylimino)butanoate (1a):** yellow oil, <sup>1</sup>H NMR (400 MHz, Chloroform-*d*)  $\delta$  7.40 – 7.31 (m, 2H), 7.23 (t,  $J$  = 7.5 Hz, 1H), 7.01 (dd,  $J$  = 8.4, 1.2 Hz, 2H), 4.16 (q,  $J$  = 7.1 Hz, 2H), 2.55 (s, 3H), 1.07 (t,  $J$  = 7.1 Hz, 3H). <sup>13</sup>C NMR (101 MHz, CDCl<sub>3</sub>)  $\delta$  196.77, 163.49, 157.47, 147.29, 129.00, 127.04, 119.79, 61.81, 24.63, 13.74. **HRMS** (ESI)  $m/z$ . [M+H]<sup>+</sup> calcd for C<sub>12</sub>H<sub>14</sub>NO<sub>3</sub>: 220.0974; found:220.0974.

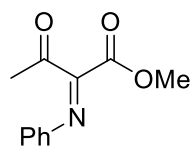

**Methyl (*E*)-3-oxo-2-(phenylimino)butanoate (1b):** yellow oil, <sup>1</sup>H NMR (400 MHz, Chloroform-*d*)  $\delta$  7.37 (t,  $J$  = 7.9 Hz, 2H), 7.30 – 7.18 (m, 1H), 7.07 – 6.98 (m, 2H), 3.68 (s, 3H), 2.56 (s, 3H). <sup>13</sup>C NMR (101 MHz, CDCl<sub>3</sub>)  $\delta$  196.77, 164.11, 157.12, 147.20, 129.18, 127.31, 119.91, 52.31, 24.64. **HRMS** (ESI)  $m/z$ . [M+H]<sup>+</sup> calcd for C<sub>11</sub>H<sub>12</sub>NO<sub>3</sub>: 206.0817; found:206.0817.

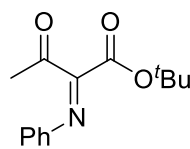

**Tert-butyl (*E*)-3-oxo-2-(phenylimino)butanoate (1c):** yellow oil, <sup>1</sup>H NMR (400 MHz, Chloroform-*d*)  $\delta$  7.35 (t,  $J$  = 7.8 Hz, 2H), 7.21 (t,  $J$  = 7.4 Hz, 1H), 7.07 – 6.98 (m, 2H), 2.53 (s, 3H), 1.31 (s, 3H). <sup>13</sup>C NMR (101 MHz, CDCl<sub>3</sub>)  $\delta$  196.98, 162.54, 158.06, 147.60, 128.86, 126.60, 119.77, 84.42, 27.79, 24.70. **HRMS** (ESI)  $m/z$ . [M+H]<sup>+</sup> calcd for C<sub>14</sub>H<sub>18</sub>NO<sub>3</sub>: 248.1281; found:248.1286.

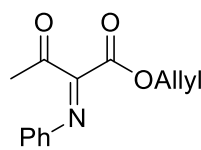

**Allyl (*E*)-3-oxo-2-(phenylimino)butanoate (1d):** yellow oil, <sup>1</sup>H NMR (400 MHz, Chloroform-*d*)  $\delta$  7.35 (t,  $J$  = 7.8 Hz, 2H), 7.27 – 7.19 (m, 1H), 7.07 – 6.98 (m, 2H), 5.67 (ddt,  $J$  = 16.6, 10.4, 5.9 Hz, 1H), 5.21 – 5.02 (m, 2H), 4.59 (d,  $J$  = 5.9 Hz, 2H), 2.56 (s, 3H). <sup>13</sup>C NMR (101 MHz, CDCl<sub>3</sub>)  $\delta$  196.70, 163.23, 157.18, 147.26, 130.65, 129.10, 127.18, 119.92, 119.43, 66.19, 24.65. **HRMS** (ESI)  $m/z$ . [M+H]<sup>+</sup> calcd for C<sub>13</sub>H<sub>14</sub>NO<sub>3</sub>: 232.0974; found:232.0974.

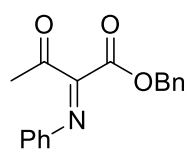

**Benzyl (*E*)-3-oxo-2-(phenylimino)butanoate (1e):** yellow oil, <sup>1</sup>H NMR (400 MHz, Chloroform-*d*)  $\delta$  7.27 – 7.20 (m, 5H), 7.17 (d,  $J$  = 7.3 Hz, 1H), 7.05 (dd,  $J$  = 7.6, 1.9 Hz, 2H), 6.94 (dd,  $J$  = 7.0, 1.6 Hz, 2H), 5.09 (s, 2H), 2.51 (s, 3H). <sup>13</sup>C NMR (101 MHz, CDCl<sub>3</sub>)  $\delta$  196.69, 163.43, 157.07, 147.12, 134.32, 129.13, 128.56, 128.55, 128.53, 127.22, 119.95, 67.47, 24.65. **HRMS** (ESI)  $m/z$ . [M+H]<sup>+</sup> calcd for C<sub>17</sub>H<sub>16</sub>NO<sub>3</sub>: 282.1130; found:282.1130.

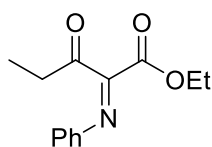

**Ethyl (*E*)-3-oxo-2-(phenylimino)pentanoate (1f)** : yellow oil,  $^1\text{H NMR}$  (400 MHz, Chloroform-*d*)  $\delta$  7.34 (t,  $J = 7.7$  Hz, 2H), 7.21 (t,  $J = 7.5$  Hz, 1H), 7.00 (d,  $J = 7.8$  Hz, 2H), 4.15 (q,  $J = 7.2$  Hz, 2H), 3.02 (q,  $J = 7.1$  Hz, 2H), 1.17 (t,  $J = 7.2$  Hz, 3H), 1.06 (t,  $J = 7.1$  Hz, 3H).  $^{13}\text{C NMR}$  (101 MHz,  $\text{CDCl}_3$ )  $\delta$  199.35, 163.56, 157.16, 147.39, 128.98, 126.91, 119.76, 61.75, 30.33, 13.74, 7.36. **HRMS** (ESI)  $m/z$ .  $[\text{M}+\text{Na}]^+$  calcd for  $\text{C}_{13}\text{H}_{15}\text{NO}_3\text{Na}$ : 256.0950; Found 256.0941.

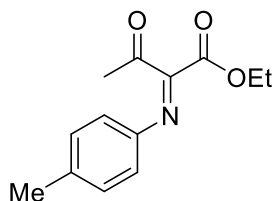

**Ethyl (*E*)-3-oxo-2-(p-tolylimino)butanoate (1g)** : yellow oil,  $^1\text{H NMR}$  (400 MHz, Chloroform-*d*)  $\delta$  7.15 (d,  $J = 7.9$  Hz, 2H), 6.95 (d,  $J = 7.8$  Hz, 2H), 4.18 (q,  $J = 7.1$  Hz, 2H), 2.52 (s, 3H), 2.33 (s, 3H), 1.12 (t,  $J = 7.1$  Hz, 3H).  $^{13}\text{C NMR}$  (101 MHz,  $\text{CDCl}_3$ )  $\delta$  196.92, 164.00, 156.63, 144.55, 137.51, 129.64, 120.41, 61.76, 24.58, 21.01, 13.78. **HRMS** (ESI)  $m/z$ .  $[\text{M}+\text{Na}]^+$  calcd for  $\text{C}_{13}\text{H}_{15}\text{NO}_3\text{Na}$ : 256.0950; Found 256.0950.

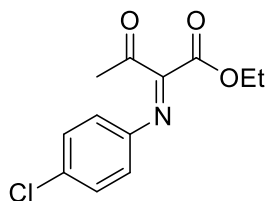

**Ethyl (*E*)-2-((4-chlorophenyl)imino)-3-oxobutanoate (1h)**: yellow oil,  $^1\text{H NMR}$  (400 MHz, Chloroform-*d*)  $\delta$  7.31 (d,  $J = 8.1$  Hz, 2H), 6.95 (d,  $J = 8.1$  Hz, 2H), 4.17 (q,  $J = 7.1$  Hz, 2H), 2.52 (s, 3H), 1.10 (t,  $J = 7.1$  Hz, 3H).  $^{13}\text{C NMR}$  (101 MHz,  $\text{CDCl}_3$ )  $\delta$  196.48, 163.24, 157.77, 145.64, 132.75, 129.19, 121.38, 62.02, 24.59, 13.80. **HRMS** (ESI)  $m/z$ .  $[\text{M}+\text{Na}]^+$  calcd for  $\text{C}_{12}\text{H}_{12}\text{ClNO}_3\text{Na}$ : 276.0403; Found 276.0400.

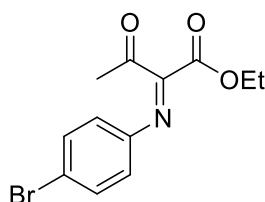

**Ethyl (*E*)-2-((4-bromophenyl)imino)-3-oxobutanoate (1i)** : yellow oil,  $^1\text{H NMR}$  (400 MHz, Chloroform-*d*)  $\delta$  7.49 (d,  $J = 8.2$  Hz, 2H), 6.90 (d,  $J = 8.2$  Hz, 2H), 4.19 (q,  $J = 7.1$  Hz, 2H), 2.54 (s, 3H), 1.13 (t,  $J = 7.1$  Hz, 3H).  $^{13}\text{C NMR}$  (101 MHz,  $\text{CDCl}_3$ )  $\delta$  196.51, 163.21, 157.77, 146.14, 132.16, 121.61, 120.64, 62.07, 24.63, 13.82. **HRMS** (ESI)  $m/z$ .  $[\text{M}+\text{H}]^+$  calcd for  $\text{C}_{12}\text{H}_{13}\text{BrNO}_3$ : 298.0079; found:298.0079.

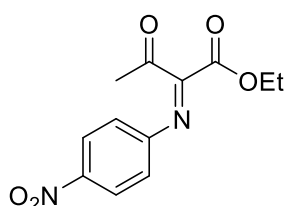

**Ethyl (*E*)-2-((4-nitrophenyl)imino)-3-oxobutanoate (1j)** : yellow oil,  $^1\text{H NMR}$  (400 MHz, Chloroform-*d*)  $\delta$  8.28 – 8.16 (m, 2H), 7.10 – 7.02 (m, 2H), 4.15 (q,  $J = 7.2$  Hz, 2H), 2.57 (s, 3H), 1.08 (t,  $J = 7.2$  Hz, 3H).  $^{13}\text{C NMR}$  (101 MHz,  $\text{CDCl}_3$ )  $\delta$  195.77, 162.00, 158.82, 152.85, 145.88, 124.85, 119.66, 62.41, 24.67, 13.87. **HRMS** (ESI)  $m/z$ .  $[\text{M}+\text{Na}]^+$  calcd for  $\text{C}_{12}\text{H}_{12}\text{N}_2\text{O}_5\text{Na}$ : 287.0644; Found 287.0641.

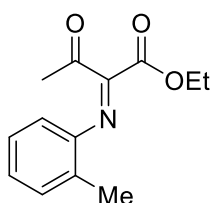

**Ethyl (*E*)-3-oxo-2-(o-tolylimino)butanoate (1k)**: yellow oil,  $^1\text{H NMR}$  (400 MHz, Chloroform-*d*)  $\delta$  7.23 – 7.17 (m, 1H), 7.14 – 7.05 (m, 2H), 6.78 – 6.70 (m, 1H), 4.12 (q,  $J = 7.1$  Hz, 2H), 2.56 (s, 3H), 2.22 (s, 3H), 1.02 (t,  $J = 7.1$  Hz, 3H).  $^{13}\text{C NMR}$  (101 MHz,  $\text{CDCl}_3$ )  $\delta$  196.63, 163.32, 157.25, 146.37, 130.43, 129.62, 126.86, 126.26, 117.09, 61.71, 24.69, 17.78, 13.74. **HRMS** (ESI)  $m/z$ .  $[\text{M}+\text{Na}]^+$  calcd for  $\text{C}_{13}\text{H}_{15}\text{NO}_3\text{Na}$ : 256.0950; Found 256.0945.

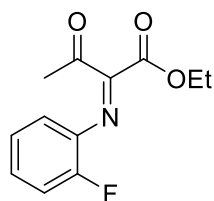

**Ethyl (*E*)-2-((2-fluorophenyl)imino)-3-oxobutanoate (1l)** : yellow oil,  $^1\text{H}$  NMR (400 MHz, Chloroform-*d*)  $\delta$  7.23 – 7.04 (m, 3H), 6.94 (t,  $J = 7.8$  Hz, 1H), 4.16 (q,  $J = 7.1$  Hz, 2H), 2.56 (s, 3H), 1.07 (t,  $J = 7.1$  Hz, 3H).  $^{13}\text{C}$  NMR (101 MHz, Chloroform-*d*)  $\delta$  196.31, 162.57, 159.03, 153.99, 151.51, 135.35 (d,  $J = 12.0$  Hz), 128.21 (d,  $J = 7.5$  Hz), 124.25 (d,  $J = 3.9$  Hz), 120.63, 116.18 (d,  $J = 19.3$  Hz), 61.97, 24.75 (d,  $J = 1.5$  Hz), 13.69.  $^{19}\text{F}$  NMR (376 MHz,  $\text{CDCl}_3$ )  $\delta$  -123.43. **HRMS** (ESI)  $m/z$ .  $[\text{M}+\text{Na}]^+$  calcd for  $\text{C}_{12}\text{H}_{12}\text{FNO}_3\text{Na}$ : 260.0699; Found 260.0697.

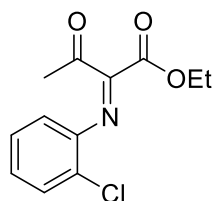

**Ethyl (*E*)-2-((2-chlorophenyl)imino)-3-oxobutanoate (1m)** : yellow oil,  $^1\text{H}$  NMR (400 MHz, Chloroform-*d*)  $\delta$  7.43 (d,  $J = 9.3$  Hz, 1H), 7.25 – 7.11 (m, 2H), 6.86 (d,  $J = 6.0$  Hz, 1H), 4.14 (q,  $J = 7.1$  Hz, 2H), 2.60 (s, 3H), 1.04 (t,  $J = 7.1$  Hz, 3H).  $^{13}\text{C}$  NMR (101 MHz,  $\text{CDCl}_3$ )  $\delta$  196.36, 162.40, 158.51, 144.86, 130.00, 127.52, 127.18, 119.03, 62.00, 24.89, 13.76. **HRMS** (ESI)  $m/z$ .  $[\text{M}+\text{Na}]^+$  calcd for  $\text{C}_{12}\text{H}_{12}\text{ClNO}_3\text{Na}$ : 276.0403; Found 276.0401.

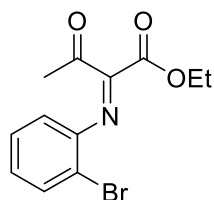

**Ethyl (*E*)-2-((2-bromophenyl)imino)-3-oxobutanoate (1n)** : yellow oil,  $^1\text{H}$  NMR (400 MHz, Chloroform-*d*)  $\delta$  7.62 (d,  $J = 6.5$  Hz, 1H), 7.27 (t,  $J = 6.8$  Hz, 1H), 7.11 – 7.03 (m, 1H), 6.86 (d,  $J = 6.4$  Hz, 1H), 4.15 (q,  $J = 7.1$ , 6.0 Hz, 2H), 2.61 (s, 3H), 1.05 (t,  $J = 7.1$  Hz, 3H).  $^{13}\text{C}$  NMR (101 MHz,  $\text{CDCl}_3$ )  $\delta$  196.35, 162.33, 158.13, 146.18, 133.04, 127.88, 127.78, 118.89, 115.30, 61.99, 24.93, 13.77. **HRMS** (ESI)  $m/z$ .  $[\text{M}+\text{Na}]^+$  calcd for  $\text{C}_{12}\text{H}_{12}\text{BrNO}_3\text{Na}$ : 319.9898; found:319.9895.

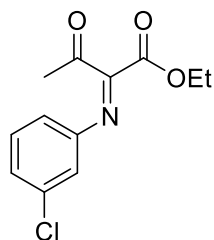

**Ethyl (*E*)-2-((3-chlorophenyl)imino)-3-oxobutanoate (1o)** : yellow oil,  $^1\text{H}$  NMR (400 MHz, Chloroform-*d*)  $\delta$  7.30 (t,  $J = 8.1$  Hz, 1H), 7.21 (d,  $J = 8.2$  Hz, 1H), 7.03 (s, 1H), 6.90 (d,  $J = 7.9$  Hz, 1H), 4.20 (q,  $J = 7.2$  Hz, 2H), 2.54 (s, 3H), 1.11 (t,  $J = 7.2$  Hz, 3H).  $^{13}\text{C}$  NMR (101 MHz,  $\text{CDCl}_3$ )  $\delta$  196.33, 162.85, 158.28, 148.38, 134.71, 130.16, 126.78, 119.85, 117.88, 62.03, 24.56, 13.78. **HRMS** (ESI)  $m/z$ .  $[\text{M}+\text{Na}]^+$  calcd for  $\text{C}_{12}\text{H}_{12}\text{ClNO}_3\text{Na}$ : 276.0403; Found 276.0401.

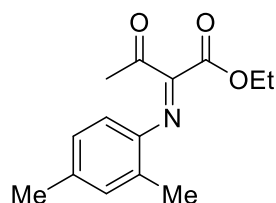

**Ethyl (*E*)-2-((2,4-dimethylphenyl)imino)-3-oxobutanoate (1p)** : yellow oil,  $^1\text{H}$  NMR (400 MHz, Chloroform-*d*)  $\delta$  7.04 (s, 1H), 6.92 (d,  $J = 8.1$  Hz, 1H), 6.69 (d,  $J = 8.1$  Hz, 1H), 4.16 (q,  $J = 7.2$  Hz, 2H), 2.55 (s, 3H), 2.29 (s, 3H), 2.23 (s, 3H), 1.09 (t,  $J = 7.2$  Hz, 3H).  $^{13}\text{C}$  NMR (101 MHz,  $\text{CDCl}_3$ )  $\delta$  196.80, 163.82, 156.36, 143.55, 137.14, 131.26, 130.57, 126.76, 117.20, 61.66, 24.66, 20.91, 17.76, 13.78. **HRMS** (ESI)  $m/z$ .  $[\text{M}+\text{Na}]^+$  calcd for  $\text{C}_{14}\text{H}_{17}\text{NO}_3\text{Na}$ : 270.1106; Found 270.1100.

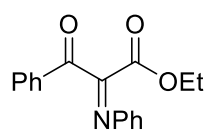

**Ethyl 3-oxo-3-phenyl-2-(phenylimino)propanoate (1q)** : mixture of *Z* and *E*, yellow oil,  $^1\text{H}$  NMR (400 MHz, Chloroform-*d*)  $\delta$  7.95 (dd,  $J = 196.2$ , 7.0 Hz, 2H), 7.64 – 7.19 (m, 4H), 7.19 – 6.72 (m, 4H), 4.39 (q,  $J = 7.1$  Hz, 1.34H), 4.17 (q,  $J = 7.1$  Hz, 0.63H), 1.31 (t,  $J = 7.1$  Hz, 2.01H), 1.06 (t,  $J = 7.1$  Hz, 0.94H).

$^{13}\text{C}$  NMR (101 MHz,  $\text{CDCl}_3$ )  $\delta$  194.06, 189.15, 162.93, 162.00, 158.66, 157.33, 147.80, 146.90, 134.63, 134.38, 134.04, 133.68, 130.82, 129.05, 128.95, 128.85, 128.48, 126.82, 126.71, 120.54, 119.41, 62.92, 62.00, 14.04, 13.75. **HRMS** (ESI)  $m/z$ .  $[\text{M}+\text{H}]^+$  calcd for  $\text{C}_{17}\text{H}_{16}\text{NO}_3$ : 282.1130; Found 282.1129.

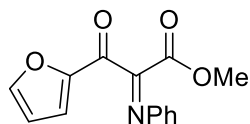

**Methyl -3-(furan-2-yl)-3-oxo-2-(phenylimino)propanoate (1r)** : mixture of *Z* and *E*, yellow oil,  $^1\text{H}$  NMR (400 MHz, Chloroform-*d*)  $\delta$  8.03 – 7.30 (m, 3H), 7.30 – 6.77 (m, 4H), 6.52 (m, 1H), 3.94 (s, 1.19H), 3.69 (s, 1.55H).

$^{13}\text{C}$  NMR (101 MHz,  $\text{CDCl}_3$ )  $\delta$  180.49, 175.19, 163.23, 162.08, 156.55, 156.48, 150.46, 149.46, 148.91, 148.48, 147.39, 146.76, 129.22, 128.93, 127.20, 126.99, 124.62, 120.63, 120.40, 119.71, 113.05, 112.78, 53.56, 52.47. **HRMS** (ESI)  $m/z$ .  $[\text{M}+\text{H}]^+$  calcd for  $\text{C}_{14}\text{H}_{12}\text{NO}_4$ : 258.0766; Found 258.0767.

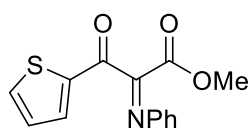

**Methyl -3-oxo-2-(phenylimino)-3-(thiophen-2-yl)propanoate (1s)** : mixture of *Z* and *E*, yellow oil,  $^1\text{H}$  NMR (400 MHz, Chloroform-*d*)  $\delta$  8.35 – 6.87 (m, 8H), 3.96 (s, 0.9H), 3.74 (s, 2H).  $^{13}\text{C}$  NMR (101 MHz,  $\text{CDCl}_3$ )

$\delta$  185.45, 179.84, 163.55, 162.20, 156.86, 156.52, 146.85, 146.71, 140.76, 137.78, 137.56, 136.97, 136.60, 135.42, 129.26, 129.00, 128.58, 127.90, 127.45, 127.21, 120.79, 120.05, 53.64, 52.49. **HRMS** (ESI)  $m/z$ .  $[\text{M}+\text{H}]^+$  calcd for  $\text{C}_{14}\text{H}_{12}\text{NO}_3\text{S}$ : 274.0538; Found 274.0538.

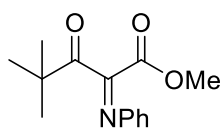

**Methyl -4,4-dimethyl-3-oxo-2-(phenylimino)pentanoate (1t)** : mixture of *Z* and *E*, yellow oil,  $^1\text{H}$  NMR (400 MHz, Chloroform-*d*)  $\delta$  7.33 (dt,  $J$  = 11.7, 7.8 Hz, 2H), 7.18 (q,  $J$  = 8.5 Hz, 1H), 6.94 (d,  $J$  = 7.9 Hz, 2H), 3.95 (s, 1.72H), 3.63 (s, 1.27H), 1.41 (s, 3.9H), 0.86 (s, 5.25H).  $^{13}\text{C}$  NMR (101 MHz,  $\text{CDCl}_3$ )

$\delta$  211.94, 203.77, 163.54, 162.40, 159.83, 156.12, 147.45, 147.38, 129.07, 128.98, 126.72, 126.62, 120.79, 119.31, 53.44, 52.13, 44.48, 43.32, 26.95, 26.27. **HRMS** (ESI)  $m/z$ .  $[\text{M}+\text{H}]^+$  calcd for  $\text{C}_{14}\text{H}_{18}\text{NO}_3$ : 248.1287; Found 248.1293.

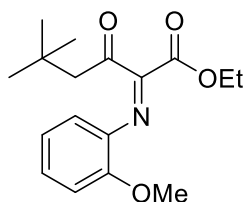

**Ethyl (E)-2-((2-methoxyphenyl)imino)-5,5-dimethyl-3-oxohexanoate (1u)** : yellow oil,  $^1\text{H}$  NMR (400 MHz, Chloroform-*d*)  $^1\text{H}$  NMR (400 MHz, Chloroform-*d*)  $\delta$  7.20 – 7.10 (m, 1H), 6.89 (t,  $J$  = 7.7 Hz, 2H), 6.81 (d,  $J$  = 8.2 Hz, 1H), 4.12 (q,  $J$  = 7.1 Hz, 2H), 3.79 (s, 3H), 2.93 (s, 2H), 1.08 (s, 9H), 1.05 (t,  $J$  = 7.1 Hz, 3H).  $^{13}\text{C}$  NMR (101 MHz,  $\text{CDCl}_3$ )  $\delta$  199.20, 163.21, 158.71, 149.75, 137.16, 127.68, 120.57, 119.59, 111.49, 61.49, 55.66, 48.29,

31.83, 29.83, 13.81. **HRMS** (ESI)  $m/z$ .  $[\text{M}+\text{Na}]^+$  calcd for  $\text{C}_{17}\text{H}_{23}\text{NO}_4\text{Na}$ : 328.1525; Found 328.1517.

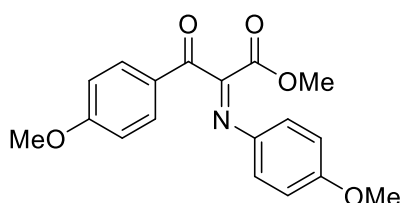

**Methyl -3-(4-methoxyphenyl)-2-((4-methoxyphenyl)imino)-3-oxopropanoate (1v)** : mixture of *Z* and *E*, yellow oil,  $^1\text{H}$  NMR (400 MHz, Chloroform-*d*)  $\delta$  7.68 – 6.41 (m, 8H), 3.83 (s, 3H), 3.70 (s, 3H), 3.59 (s, 3H).

$^{13}\text{C}$  NMR (101 MHz,  $\text{CDCl}_3$ )  $\delta$  193.47, 187.53, 164.78, 164.32, 162.89, 159.16, 155.89, 155.39, 140.31, 139.55, 133.33, 131.46, 127.40, 126.56, 123.85, 122.40, 116.30, 114.73, 114.44, 114.42, 114.15, 113.75,

55.63, 55.50, 55.40, 55.22, 53.26, 52.32. **HRMS** (ESI) m/z.  $[M+Na]^+$  calcd for  $C_{18}H_{17}NO_5Na$ : 350.1004; Found 350.1001.



### 3. Typical procedure for *N*-alkenylation:

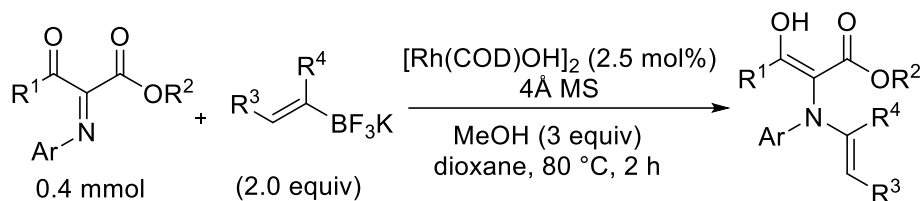

Under argon atmosphere, a mixture of  $[\text{Rh}(\text{OH})(\text{COD})]_2$  (0.01 mmol, 2.5mol %), ketimine (0.4 mmol), potassium alkenyltrifluoroborates (0.8 mmol, 2 equiv) and 150mg 4 Å MS was added MeOH (1.2 mmol, 3 equiv) and dioxane (2 mL). The mixture was stirred at 80 °C for 2 hours, After the reaction is completed, the mixture was filtered through a thin-layer of celite. The filtrate was concentrated under reduced pressure. The residue was purified by flash chromatography on silica gel (eluent: EtOAc/petroleum ether = 1/50 to 1/10) to afford product as colorless oil.

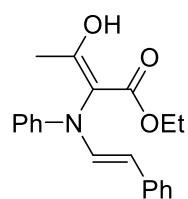

#### Ethyl (*E*)-3-hydroxy-2-(phenyl(*E*-styryl)amino)but-2-enoate (**3aa**) :

Colorless oil was isolated as single diastereoisomer by flash column chromatography (petroleum/ethyl acetate =20/1) in 98% yield (126.6 mg).  $^1\text{H}$  NMR (400 MHz, Chloroform-*d*)  $\delta$  12.59 (s, 1H), 7.36 (d,  $J$  = 13.8 Hz, 1H), 7.25 (q,  $J$  = 6.8, 5.8 Hz, 6H), 7.06 (t,  $J$  = 5.0 Hz, 1H), 6.93 (d,  $J$  = 8.9 Hz, 3H), 5.60 (d,  $J$  = 13.9 Hz, 1H), 4.14 (q,  $J$  = 7.1 Hz, 2H), 1.89 (s, 3H), 1.08 (t,  $J$  = 7.1 Hz, 3H).  $^{13}\text{C}$  NMR (101 MHz,  $\text{CDCl}_3$ )  $\delta$  176.37, 171.23, 145.97, 138.16, 131.43, 129.31, 128.59, 124.91, 124.59, 121.12, 116.13, 106.47, 105.67, 60.96, 17.63, 14.11. HRMS (ESI)  $m/z$ .  $[\text{M}+\text{Na}]^+$  calcd for  $\text{C}_{20}\text{H}_{21}\text{NO}_3\text{Na}$ : 346.1419; found: 346.1413.

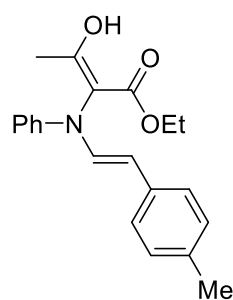

#### Ethyl (*E*)-3-hydroxy-2-(((*E*)-4-methylstyryl)(phenyl)amino)but-2-enoate (**3ab**) :

Colorless oil was isolated as single diastereoisomer by flash column chromatography (petroleum/ethyl acetate =20/1) in 95% yield (128.1 mg).  $^1\text{H}$  NMR (400 MHz, Chloroform-*d*)  $\delta$  12.62 (s, 1H), 7.41 – 7.23 (m, 3H), 7.19 (d,  $J$  = 7.7 Hz, 2H), 7.08 (d,  $J$  = 7.4 Hz, 2H), 6.95 (d,  $J$  = 7.5 Hz, 3H), 5.62 (d,  $J$  = 13.8 Hz, 1H), 4.18 (q,  $J$  = 7.0 Hz, 2H), 2.32 (s, 3H), 1.92 (s, 3H), 1.11 (t,  $J$  = 7.0 Hz, 3H).  $^{13}\text{C}$  NMR (101 MHz,  $\text{CDCl}_3$ )  $\delta$  176.34, 171.29, 146.03, 135.22, 134.57, 130.66, 129.29, 124.53, 120.91, 115.98, 106.57, 105.71, 60.92, 20.99, 17.63, 14.12. HRMS (ESI)  $m/z$ .  $[\text{M}+\text{Na}]^+$  calcd for  $\text{C}_{21}\text{H}_{23}\text{NO}_3\text{Na}$ : 360.1576; found: 360.1571.

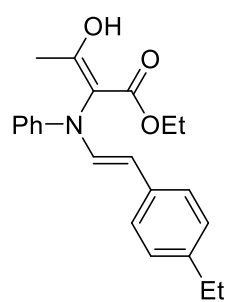

#### Ethyl (*E*)-2-(((*E*)-4-ethylstyryl)(phenyl)amino)-3-hydroxybut-2-enoate (**3ac**) :

Colorless oil was isolated as single diastereoisomer by flash column chromatography (petroleum/ethyl acetate =20/1) in 95% yield (133.1 mg).  $^1\text{H}$  NMR (400 MHz, Chloroform-*d*)  $\delta$  12.62 (s, 1H), 7.35 (d,  $J$  = 13.9 Hz, 1H), 7.32 – 7.25 (m, 2H), 7.21 (d,  $J$  = 7.9 Hz, 2H), 7.11 (d,  $J$  = 7.9 Hz, 2H), 6.98 – 6.91 (m, 3H), 5.63 (d,  $J$  = 13.9 Hz, 1H), 4.17 (q,  $J$  = 7.1 Hz, 2H), 2.61 (q,  $J$  = 7.6 Hz, 2H), 1.91 (s, 3H), 1.23 (t,  $J$  = 7.6 Hz, 3H), 1.11 (t,  $J$  = 7.1 Hz, 3H).  $^{13}\text{C}$  NMR (101 MHz,  $\text{CDCl}_3$ )  $\delta$  176.38, 171.34, 146.09, 141.16, 135.55,

130.77, 129.33, 128.15, 124.64, 120.96, 116.04, 106.62, 105.77, 60.96, 28.49, 17.65, 15.72, 14.15.

**HRMS** (ESI) *m/z*.  $[M+Na]^+$  calcd for  $C_{22}H_{25}NO_3Na$ : 374.1732; found: 374.1722.

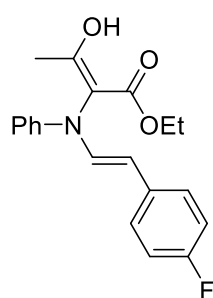

**Ethyl (E)-2-(((E)-4-fluorostyryl)(phenyl)amino)-3-hydroxybut-2-enoate**

**(3ad)** : Colorless oil was isolated as single diastereoisomer by flash column chromatography (petroleum/ethyl acetate =20/1) in 87% yield (118.8 mg). **<sup>1</sup>H NMR** (400 MHz, Chloroform-*d*)  $\delta$  12.61 (s, 1H), 7.45 – 7.10 (m, 5H), 6.94 (d,  $J$  = 7.8 Hz, 5H), 5.59 (d,  $J$  = 13.9 Hz, 1H), 4.17 (q,  $J$  = 7.2 Hz, 2H), 1.91 (s, 3H), 1.10 (t,  $J$  = 7.1 Hz, 3H). **<sup>13</sup>C NMR** (101 MHz,  $CDCl_3$ )  $\delta$  176.39, 171.20, 161.97, 159.55, 145.94, 134.25, 134.22, 131.27, 131.25, 129.34, 125.83, 125.76, 121.16, 116.10, 115.49, 115.28, 105.66, 105.46, 60.97, 17.64, 14.12.

**<sup>19</sup>F NMR** (376 MHz,  $CDCl_3$ )  $\delta$  -118.23. **HRMS** (ESI) *m/z*  $[M+Na]^+$ . calcd for  $C_{20}H_{20}FNO_3Na$ : 364.1325; found: 364.1323.

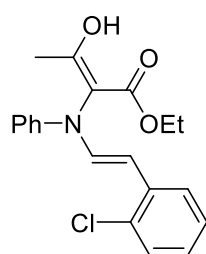

**Ethyl (E)-2-(((E)-2-chlorostyryl)(phenyl)amino)-3-hydroxybut-2-enoate**

**(3ae)** : Colorless oil was isolated as single diastereoisomer by flash column chromatography (petroleum/ethyl acetate =20/1) in 90% yield (128.3 mg). **<sup>1</sup>H NMR** (400 MHz, Chloroform-*d*)  $\delta$  12.65 (s, 1H), 7.45 (d,  $J$  = 7.8 Hz, 1H), 7.39 – 7.22 (m, 4H), 7.17 (t,  $J$  = 7.6 Hz, 1H), 7.09 – 6.85 (m, 4H), 5.95 (d,  $J$  = 13.8 Hz, 1H), 4.38 – 4.05 (m, 2H), 1.95 (s, 3H), 1.14 (t,  $J$  = 7.0 Hz, 3H). **<sup>13</sup>C NMR** (101 MHz,  $CDCl_3$ )  $\delta$  176.47, 171.01, 145.85, 136.31, 133.49, 131.53, 129.66,

129.35, 126.72, 125.86, 124.91, 121.51, 116.38, 105.56, 102.97, 61.01, 17.62, 14.15. **HRMS** (ESI) *m/z*.  $[M+Na]^+$  calcd for  $C_{20}H_{20}ClNO_3Na$ : 380.1029; found: 380.1028.

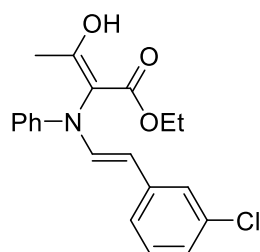

**Ethyl (E)-2-(((E)-3-chlorostyryl)(phenyl)amino)-3-hydroxybut-2-enoate**

**(3af)** : Colorless oil was isolated as single diastereoisomer by flash column chromatography (petroleum/ethyl acetate =20/1) in 93% yield (132.8 mg). **<sup>1</sup>H NMR** (400 MHz, Chloroform-*d*)  $\delta$  12.62 (s, 1H), 7.39 (d,  $J$  = 13.8 Hz, 1H), 7.29 (dd,  $J$  = 16.7, 9.0 Hz, 2H), 7.14 (dd,  $J$  = 18.5, 7.7 Hz, 2H), 7.04 (d,  $J$  = 7.6 Hz, 1H), 6.97 (d,  $J$  = 8.2 Hz, 3H), 5.55 (d,  $J$  = 13.8 Hz, 1H), 4.18 (q,  $J$  = 7.1 Hz, 2H), 1.92 (s, 3H), 1.12 (t,  $J$  = 7.1 Hz,

3H). **<sup>13</sup>C NMR** (101 MHz,  $CDCl_3$ )  $\delta$  176.41, 171.03, 145.75, 140.24, 134.47, 132.64, 129.71, 129.36, 124.61, 124.23, 122.74, 121.57, 116.41, 105.53, 104.89, 61.02, 17.63, 14.11. **HRMS** (ESI) *m/z*.  $[M+Na]^+$  calcd for  $C_{20}H_{20}ClNO_3Na$ : 380.1029; found: 380.1023.

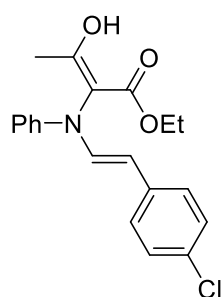

**Ethyl (E)-2-(((E)-4-chlorostyryl)(phenyl)amino)-3-hydroxybut-2-enoate**

**(3ag)** : Colorless oil was isolated as single diastereoisomer by flash column chromatography (petroleum/ethyl acetate =20/1) in 92% yield (131.6 mg). **<sup>1</sup>H NMR** (400 MHz, Chloroform-*d*)  $\delta$  12.60 (s, 1H), 7.34 (d,  $J$  = 13.8 Hz, 1H), 7.28 (t,  $J$  = 7.9 Hz, 2H), 7.23 – 7.13 (m, 4H), 6.94 (d,  $J$  = 8.2 Hz, 3H), 5.56 (d,  $J$  = 13.8 Hz, 1H), 4.16 (q,  $J$  = 7.1 Hz, 2H), 1.90 (s, 3H), 1.09 (t,  $J$  = 7.1 Hz, 3H). **<sup>13</sup>C NMR** (101 MHz,  $CDCl_3$ )  $\delta$  176.44, 171.15, 145.89, 136.81, 132.07, 130.14, 129.40, 128.67, 125.72, 121.46, 116.34, 105.67, 105.25,

61.03, 17.69, 14.16. **HRMS** (ESI) *m/z*.  $[M+Na]^+$  calcd for  $C_{20}H_{20}ClNO_3Na$ : 380.1029; found:

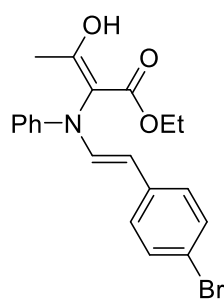

**Ethyl (*E*)-2-(((*E*)-4-bromostyryl)(phenyl)amino)-3-hydroxybut-2-enoate (3ah)** : Colorless oil was isolated as single diastereoisomer by flash column chromatography (petroleum/ethyl acetate =20/1) in 93% yield (149.1 mg).  $^1\text{H NMR}$  (400 MHz, Chloroform-*d*)  $\delta$  12.60 (s, 1H), 7.39 – 7.22 (m, 5H), 7.11 (d,  $J$  = 8.1 Hz, 2H), 6.94 (d,  $J$  = 8.5 Hz, 3H), 5.53 (d,  $J$  = 13.7 Hz, 1H), 4.16 (q,  $J$  = 7.1 Hz, 2H), 1.89 (s, 3H), 1.09 (t,  $J$  = 7.1 Hz, 3H).  $^{13}\text{C NMR}$  (101 MHz,  $\text{CDCl}_3$ )  $\delta$  176.40, 171.08, 145.81, 137.22, 132.11, 131.54, 129.37, 126.04, 121.46, 117.94, 116.32, 105.59, 105.16, 61.01, 17.66, 14.12. **HRMS** (ESI)  $m/z$ .  $[\text{M}+\text{Na}]^+$  calcd for  $\text{C}_{20}\text{H}_{20}\text{BrNO}_3\text{Na}$ : 424.0524; found: 424.0524.

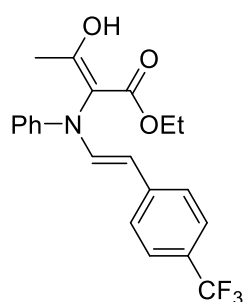

**Ethyl (*E*)-2-(((*E*)-4-(trifluoromethyl)styryl)(phenyl)amino)-3-hydroxybut-2-enoate (3ai)** : Colorless oil was isolated as single diastereoisomer by flash column chromatography (petroleum/ethyl acetate =20/1) in 91% yield (142.5 mg).  $^1\text{H NMR}$  (400 MHz, Chloroform-*d*)  $\delta$  12.66 (s, 1H), 7.54 – 7.46 (m, 3H), 7.44 – 7.30 (m, 4H), 7.01 (d,  $J$  = 8.7 Hz, 3H), 5.65 (d,  $J$  = 13.8 Hz, 1H), 4.20 (q,  $J$  = 7.1 Hz, 2H), 1.95 (s, 3H), 1.13 (t,  $J$  = 7.1 Hz, 3H).  $^{13}\text{C NMR}$  (101 MHz,  $\text{CDCl}_3$ )  $\delta$  176.50, 171.01, 145.78, 142.10, 133.71, 129.46, 125.61, 125.58, 125.54, 125.50, 124.38, 121.94, 116.71, 105.61, 104.82, 61.10, 17.69, 14.14.  $^{19}\text{F NMR}$  (376 MHz,  $\text{CDCl}_3$ )  $\delta$  -62.09. **HRMS** (ESI)  $m/z$   $[\text{M}+\text{Na}]^+$  calcd for  $\text{C}_{21}\text{H}_{20}\text{F}_3\text{NO}_3\text{Na}$ : 414.1293; found: 414.1290.

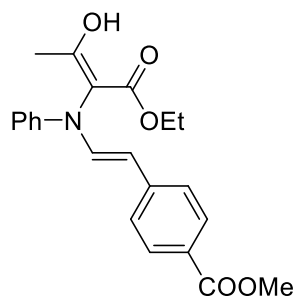

**Methyl 4-(((*E*)-2-(((*E*)-1-ethoxy-3-hydroxy-1-oxobut-2-en-2-yl)(phenyl)amino)vinyl)benzoate (3aj)** : Colorless oil was isolated as single diastereoisomer by flash column chromatography (petroleum/ethyl acetate =20/1) in 91% yield (138.6 mg).  $^1\text{H NMR}$  (400 MHz, Chloroform-*d*)  $\delta$  12.64 (s, 1H), 7.92 (d,  $J$  = 8.1 Hz, 2H), 7.53 (d,  $J$  = 13.7 Hz, 1H), 7.30 (q,  $J$  = 11.2, 10.1 Hz, 4H), 6.99 (d,  $J$  = 8.1 Hz, 3H), 5.63 (d,  $J$  = 13.7 Hz, 1H), 4.18 (q,  $J$  = 7.1 Hz, 2H), 3.89 (s, 3H), 1.93 (s, 3H), 1.11 (t,  $J$  = 7.1 Hz, 3H).  $^{13}\text{C NMR}$  (101 MHz,  $\text{CDCl}_3$ )  $\delta$  176.44, 170.93, 167.11, 145.67, 143.31, 133.87, 130.05, 129.40, 125.98, 124.04, 121.92, 116.69, 105.50, 105.23, 61.07, 51.83, 17.68, 14.10. **HRMS** (ESI)  $m/z$ .  $[\text{M}+\text{Na}]^+$  calcd for  $\text{C}_{22}\text{H}_{23}\text{NO}_5\text{Na}$ : 404.1474; found: 404.1464.

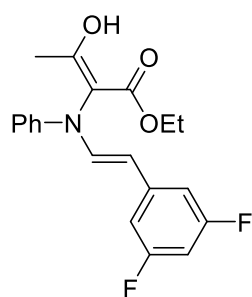

**Ethyl (*E*)-2-(((*E*)-3,5-difluorostyryl)(phenyl)amino)-3-hydroxybut-2-enoate (3ak)** : Colorless oil was isolated as single diastereoisomer by flash column chromatography (petroleum/ethyl acetate =20/1) in 89% yield (127.8 mg).  $^1\text{H NMR}$  (400 MHz, Chloroform-*d*)  $\delta$  12.63 (s, 1H), 7.41 (d,  $J$  = 13.7 Hz, 1H), 7.37 – 7.28 (m, 2H), 7.07 – 6.88 (m, 3H), 6.75 (d,  $J$  = 7.2 Hz, 2H), 6.51 (tt,  $J$  = 9.0, 2.3 Hz, 1H), 5.53 (d,  $J$  = 13.7 Hz, 1H), 4.19 (q,  $J$  = 7.1 Hz, 2H), 1.92 (s, 3H), 1.13 (t,  $J$  = 7.1 Hz, 3H).  $^{13}\text{C NMR}$  (101 MHz,  $\text{CDCl}_3$ )  $\delta$  176.48, 170.93, 164.65 (d,  $J$  = 13.8 Hz), 162.20 (d,  $J$  = 13.6 Hz), 145.67, 141.88 (d,  $J$  = 10.2 Hz), 133.81, 129.45, 122.00, 116.71, 107.52 – 106.16 (m),

105.55, 104.39, 99.72 (t,  $J = 25.9$  Hz), 61.11, 24.80, 17.67, 14.14.  $^{19}\text{F}$  NMR (376 MHz,  $\text{CDCl}_3$ )  $\delta$  -111.04. HRMS (ESI)  $m/z$ .  $[\text{M}+\text{Na}]^+$  calcd for  $\text{C}_{20}\text{H}_{19}\text{F}_2\text{NO}_3\text{Na}$ : 382.1231; found: 382.1227.

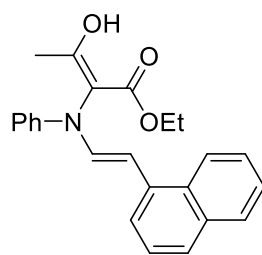

**Ethyl (E)-3-hydroxy-2-(((E)-2-(naphthalen-1-yl)vinyl)(phenyl)amino)but-2-enoate (3al)** : Colorless oil was isolated as single diastereoisomer by flash column chromatography (petroleum/ethyl acetate =20/1) in 92% yield (137.5 mg).  $^1\text{H}$  NMR (400 MHz, Chloroform- $d$ )  $\delta$  12.69 (s, 1H), 8.08 – 7.99 (m, 1H), 7.90 – 7.79 (m, 1H), 7.68 (d,  $J = 8.2$  Hz, 1H), 7.54 (d,  $J = 7.1$  Hz, 1H), 7.51 – 7.46 (m, 2H), 7.45 – 7.35 (m, 2H), 7.35 – 7.28 (m, 2H), 6.99 (dd,  $J = 16.7, 7.9$  Hz, 3H), 6.34 (d,  $J = 13.5$  Hz, 1H), 4.33 – 4.14 (m, 2H), 2.02 (s, 3H), 1.17 (t,  $J = 7.1$  Hz, 3H).  $^{13}\text{C}$  NMR (101 MHz,  $\text{CDCl}_3$ )  $\delta$  176.44, 171.31, 146.02, 135.52, 133.89, 133.57, 131.10, 129.40, 128.52, 125.83, 125.79, 125.67, 125.56, 123.92, 121.75, 121.24, 116.15, 105.94, 103.52, 61.07, 17.74, 14.25. HRMS (ESI)  $m/z$ .  $[\text{M}+\text{Na}]^+$  calcd for  $\text{C}_{24}\text{H}_{23}\text{NO}_3\text{Na}$ : 396.1576; found: 396.1582.

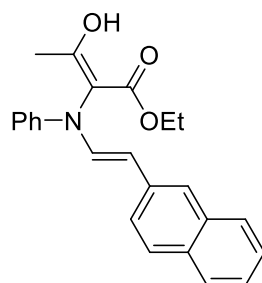

**Ethyl (E)-3-hydroxy-2-(((E)-2-(naphthalen-2-yl)vinyl)(phenyl)amino)but-2-enoate (3am)** : Colorless oil was isolated as single diastereoisomer by flash column chromatography (petroleum/ethyl acetate =20/1) in 91% yield (135.6 mg).  $^1\text{H}$  NMR (400 MHz, Chloroform- $d$ )  $\delta$  12.70 (s, 1H), 7.76 (t,  $J = 7.2$  Hz, 3H), 7.62 (s, 1H), 7.60 – 7.53 (m, 2H), 7.44 (t,  $J = 7.5$  Hz, 1H), 7.35 (dd,  $J = 17.0, 8.2$  Hz, 3H), 7.02 (dd,  $J = 15.9, 7.9$  Hz, 3H), 5.84 (d,  $J = 13.8$  Hz, 1H), 4.22 (qd,  $J = 7.2, 2.4$  Hz, 2H), 1.98 (s, 3H), 1.14 (t,  $J = 7.2$  Hz, 3H).  $^{13}\text{C}$  NMR (101 MHz,  $\text{CDCl}_3$ )  $\delta$  176.50, 171.29, 146.04, 135.77, 134.15, 131.94, 131.73, 129.43, 128.14, 127.64, 127.30, 126.21, 124.66, 123.17, 122.99, 121.34, 116.33, 106.74, 105.78, 61.06, 17.75, 14.20. HRMS (ESI)  $m/z$ .  $[\text{M}+\text{Na}]^+$  calcd for  $\text{C}_{24}\text{H}_{23}\text{NO}_3\text{Na}$ : 396.1576; found: 396.1574.

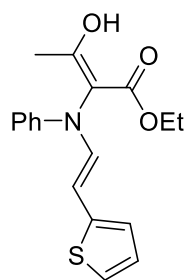

**Ethyl (E)-3-hydroxy-2-(phenyl((E)-2-(thiophen-2-yl)vinyl)amino)but-2-enoate (3an)** : Colorless oil was isolated as single diastereoisomer by flash column chromatography (petroleum/ethyl acetate =20/1) in 87% yield (114.3 mg).  $^1\text{H}$  NMR (400 MHz, Chloroform- $d$ )  $\delta$  12.61 (s, 1H), 7.50 – 7.13 (m, 3H), 7.06 – 6.84 (m, 5H), 6.75 (d,  $J = 3.5$  Hz, 1H), 5.81 (d,  $J = 13.7$  Hz, 1H), 4.17 (q,  $J = 7.1$  Hz, 2H), 1.91 (s, 3H), 1.12 (t,  $J = 7.1$  Hz, 3H).  $^{13}\text{C}$  NMR (101 MHz,  $\text{CDCl}_3$ )  $\delta$  176.49, 171.11, 145.62, 142.85, 131.57, 129.34, 127.38, 121.69, 121.26, 120.38, 116.12, 105.48, 100.70, 61.02, 17.64, 14.11. HRMS (ESI)  $m/z$ .  $[\text{M}+\text{Na}]^+$  calcd for  $\text{C}_{18}\text{H}_{19}\text{NO}_3\text{SNa}$ : 352.0983; found: 352.0986.

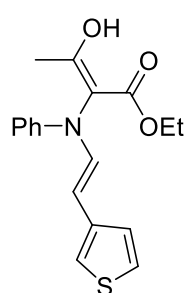

**Ethyl (E)-3-hydroxy-2-(phenyl((E)-2-(thiophen-3-yl)vinyl)amino)but-2-enoate (3ao)** : Colorless oil was isolated as single diastereoisomer by flash column chromatography (petroleum/ethyl acetate =20/1) in 87% yield (114.6 mg).  $^1\text{H}$  NMR (400 MHz, Chloroform- $d$ )  $\delta$  12.62 (s, 1H), 7.34 – 7.20 (m, 4H), 7.15 (d,  $J = 5.1$  Hz, 1H), 6.93 (d,  $J = 8.8$  Hz, 3H), 6.89 (d,  $J = 3.0$  Hz, 1H), 5.69 (d,  $J = 13.8$  Hz, 1H), 4.17 (q,  $J = 7.1, 6.4$  Hz, 2H), 1.91 (s, 3H), 1.11 (t,  $J = 7.1$  Hz, 3H).  $^{13}\text{C}$  NMR (101 MHz,  $\text{CDCl}_3$ )  $\delta$  176.50, 171.33, 145.98, 139.71, 131.64, 129.36,

125.81, 124.51, 121.02, 116.80, 116.04, 105.64, 101.79, 61.01, 17.68, 14.17. **HRMS** (ESI) *m/z*.  $[M+Na]^+$  calcd for  $C_{18}H_{19}NO_3Na$ : 352.0983; found: 352.0983.

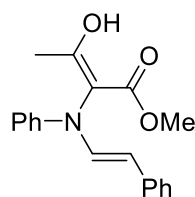

**Methyl (*E*)-3-hydroxy-2-(phenyl(*E*-styryl)amino)but-2-enoate (3ba)** : Colorless oil was isolated as single diastereoisomer by flash column chromatography (petroleum/ethyl acetate =20/1) in 96% yield (118.5 mg).  $^1H$  NMR (400 MHz, Chloroform-*d*)  $\delta$  12.57 (s, 1H), 7.42 (d,  $J$  = 13.8 Hz, 1H), 7.29 (q,  $J$  = 7.5, 7.1 Hz, 6H), 7.10 (d,  $J$  = 6.7 Hz, 1H), 6.95 (d,  $J$  = 8.4 Hz, 3H), 5.63 (d,  $J$  = 13.8 Hz, 1H), 3.70 (s, 3H), 1.92 (s, 3H).  $^{13}C$  NMR (101 MHz,  $CDCl_3$ )  $\delta$  176.67, 171.72, 145.73, 138.01, 131.18, 129.42, 128.62, 125.01, 124.63, 121.16, 115.85, 106.55, 105.30, 52.13, 17.62. **HRMS** (ESI) *m/z*.  $[M+Na]^+$  calcd for  $C_{19}H_{19}NO_3Na$ : 332.1263; found: 332.1260.

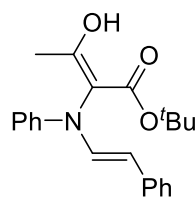

**Methyl (*E*)-3-hydroxy-2-(phenyl(*E*-styryl)amino)but-2-enoate (3ca)** : Colorless oil was isolated as single diastereoisomer by flash column chromatography (petroleum/ethyl acetate =20/1) in 96% yield (135.0 mg).  $^1H$  NMR (400 MHz, Chloroform-*d*)  $\delta$  12.72 (s, 1H), 7.30 (m, 7H), 7.07 (t,  $J$  = 6.8 Hz, 1H), 6.94 (d,  $J$  = 7.5 Hz, 2H), 5.62 (d,  $J$  = 13.8 Hz, 1H), 1.90 (s, 3H), 1.31 (s, 9H).  $^{13}C$  NMR (101 MHz,  $CDCl_3$ )  $\delta$  175.50, 170.84, 146.31, 138.44, 131.66, 129.18, 128.60, 124.78, 124.54, 121.04, 116.43, 106.71, 106.23, 82.15, 28.02, 17.68. **HRMS** (ESI) *m/z*.  $[M+Na]^+$  calcd for  $C_{22}H_{25}NO_3Na$ : 374.1732; found: 374.1727.

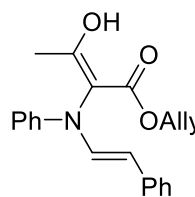

**Allyl (*E*)-3-hydroxy-2-(phenyl(*E*-styryl)amino)but-2-enoate (3da)** : Colorless oil was isolated as single diastereoisomer by flash column chromatography (petroleum/ethyl acetate =20/1) in 79% yield (105.8 mg).  $^1H$  NMR (400 MHz, Chloroform-*d*)  $\delta$  12.56 (s, 1H), 7.42 (d,  $J$  = 13.9 Hz, 1H), 7.38 – 7.19 (m, 6H), 7.11 (tt,  $J$  = 5.7, 2.4 Hz, 1H), 6.99 (d,  $J$  = 8.7 Hz, 3H), 5.82 – 5.71 (m, 1H), 5.68 (d,  $J$  = 13.9 Hz, 1H), 5.18 – 4.96 (m, 2H), 4.66 (d,  $J$  = 5.2 Hz, 2H), 1.96 (s, 3H).  $^{13}C$  NMR (101 MHz,  $CDCl_3$ )  $\delta$  176.97, 145.91, 138.13, 131.52, 131.40, 129.41, 128.63, 125.01, 124.68, 121.23, 117.60, 116.13, 106.72, 65.01, 17.71. **HRMS** (ESI) *m/z*.  $[M+Na]^+$  calcd for  $C_{21}H_{21}NO_3Na$ : 358.1419; found: 358.1413.

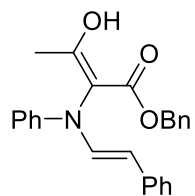

**Benzyl (*E*)-3-hydroxy-2-(phenyl(*E*-styryl)amino)but-2-enoate (3ea)** : Colorless oil was isolated as single diastereoisomer by flash column chromatography (petroleum/ethyl acetate =20/1) in 93% yield (143.1 mg).  $^1H$  NMR (400 MHz, Chloroform-*d*)  $\delta$  12.51 (s, 1H), 7.42 (d,  $J$  = 13.9 Hz, 1H), 7.35 – 7.24 (m, 6H), 7.21 – 7.09 (m, 4H), 7.07 (d,  $J$  = 6.5 Hz, 2H), 7.03 – 6.92 (m, 3H), 5.67 (d,  $J$  = 13.9 Hz, 1H), 5.44 – 4.95 (m, 2H), 1.96 (s, 3H).  $^{13}C$  NMR (101 MHz,  $CDCl_3$ )  $\delta$  176.92, 171.06, 145.99, 138.07, 135.68, 131.48, 129.43, 128.62, 128.34, 127.86, 127.28, 125.04, 124.73, 121.28, 116.31, 106.96, 105.66, 66.24, 17.74. **HRMS** (ESI) *m/z*.  $[M+Na]^+$  calcd for  $C_{25}H_{23}NO_3Na$ : 408.1576; found: 408.1575.

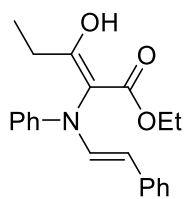

**Ethyl (*E*)-3-hydroxy-2-(phenyl(*E*)-styryl)amino)pent-2-enoate (3fa)** : Colorless oil was isolated as single diastereoisomer by flash column chromatography (petroleum/ethyl acetate =20/1) in 94% yield (126.6 mg).  $^1\text{H NMR}$  (400 MHz, Chloroform-*d*)  $\delta$  12.77 (s, 1H), 7.42 (d,  $J$  = 13.8 Hz, 1H), 7.36 – 7.21 (m, 6H), 7.10 (tt,  $J$  = 5.7, 2.7 Hz, 1H), 7.05 – 6.87 (m, 3H), 5.65 (d,  $J$  = 13.8 Hz, 1H), 4.19 (q,  $J$  = 7.1 Hz, 2H), 2.26 (ddt,  $J$  = 19.1, 14.7, 7.3 Hz, 2H), 1.12 (t,  $J$  = 7.1 Hz, 3H), 1.06 (t,  $J$  = 7.3 Hz, 3H).  $^{13}\text{C NMR}$  (101 MHz,  $\text{CDCl}_3$ )  $\delta$  180.17, 171.43, 146.36, 138.26, 131.98, 129.30, 128.63, 124.94, 124.65, 121.12, 116.24, 106.77, 104.85, 60.99, 24.28, 14.17, 9.86. **HRMS** (ESI)  $m/z$ .  $[\text{M}+\text{Na}]^+$  calcd for  $\text{C}_{21}\text{H}_{23}\text{NO}_3\text{Na}$ : 360.1576; found: 360.1578.

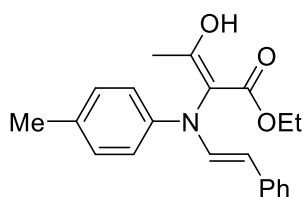

**Ethyl (*E*)-3-hydroxy-2-(((*E*)-styryl)(*p*-tolyl)amino)but-2-enoate (3ga)** : Colorless oil was isolated as single diastereoisomer by flash column chromatography (petroleum/ethyl acetate =20/1) in 91% yield (122.4 mg).  $^1\text{H NMR}$  (400 MHz, Chloroform-*d*)  $\delta$  12.62 (s, 1H), 7.38 – 7.22 (m, 3H), 7.19 (d,  $J$  = 7.7 Hz, 2H), 7.08 (d,  $J$  = 7.4 Hz, 2H), 6.95 (d,  $J$  = 7.5 Hz, 3H), 5.62 (d,  $J$  = 13.8 Hz, 1H), 4.18 (q,  $J$  = 7.0 Hz, 2H), 2.32 (s, 3H), 1.92 (s, 3H), 1.11 (t,  $J$  = 7.0 Hz, 3H).  $^{13}\text{C NMR}$  (101 MHz,  $\text{CDCl}_3$ )  $\delta$  176.34, 171.29, 146.03, 135.22, 134.57, 130.66, 129.29, 124.53, 120.91, 115.98, 106.57, 105.71, 60.92, 20.99, 17.63, 14.12. **HRMS** (ESI)  $m/z$ .  $[\text{M}+\text{Na}]^+$  calcd for  $\text{C}_{21}\text{H}_{23}\text{NO}_3\text{Na}$ : 360.1576; found: 360.1566.

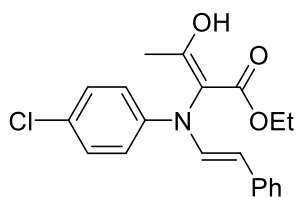

**Ethyl (*E*)-2-((4-chlorophenyl)(*E*)-styryl)amino)-3-hydroxybut-2-enoate (3ha)** : Colorless oil was isolated as single diastereoisomer by flash column chromatography (petroleum/ethyl acetate =20/1) in 93% yield (132.6 mg).  $^1\text{H NMR}$  (400 MHz, Chloroform-*d*)  $\delta$  12.60 (s, 1H), 7.34 (d,  $J$  = 13.8 Hz, 1H), 7.28 (t,  $J$  = 7.9 Hz, 2H), 7.24 – 7.12 (m, 4H), 6.94 (d,  $J$  = 8.2 Hz, 3H), 5.56 (d,  $J$  = 13.8 Hz, 1H), 4.16 (q,  $J$  = 7.1 Hz, 2H), 1.90 (s, 3H), 1.09 (t,  $J$  = 7.1 Hz, 3H).  $^{13}\text{C NMR}$  (101 MHz,  $\text{CDCl}_3$ )  $\delta$  176.44, 171.15, 145.89, 136.81, 132.07, 130.14, 129.40, 128.67, 125.72, 121.46, 116.34, 105.67, 105.25, 61.03, 17.69, 14.16. **HRMS** (ESI)  $m/z$ .  $[\text{M}+\text{Na}]^+$  calcd for  $\text{C}_{20}\text{H}_{20}\text{ClNO}_3\text{Na}$ : 380.1029; found: 380.1028.

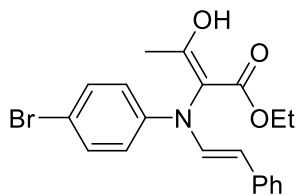

**Ethyl (*E*)-2-((4-bromophenyl)(*E*)-styryl)amino)-3-hydroxybut-2-enoate (3ia)** : Colorless oil was isolated as single diastereoisomer by flash column chromatography (petroleum/ethyl acetate =20/1) in 95% yield (152.2 mg).  $^1\text{H NMR}$  (400 MHz, Chloroform-*d*)  $\delta$  12.60 (s, 1H), 7.50 – 7.16 (m, 5H), 7.11 (d,  $J$  = 8.1 Hz, 2H), 6.94 (d,  $J$  = 8.5 Hz, 3H), 5.53 (d,  $J$  = 13.7 Hz, 1H), 4.16 (q,  $J$  = 7.1 Hz, 2H), 1.89 (s, 3H), 1.09 (t,  $J$  = 7.1 Hz, 3H).  $^{13}\text{C NMR}$  (101 MHz,  $\text{CDCl}_3$ )  $\delta$  176.40, 171.08, 145.81, 137.22, 132.11, 131.54, 129.37, 126.04, 121.46, 117.94, 116.32, 105.59, 105.16, 61.01, 17.66, 14.12. **HRMS** (ESI)  $m/z$ .  $[\text{M}+\text{Na}]^+$  calcd for  $\text{C}_{20}\text{H}_{20}\text{BrNO}_3\text{Na}$ : 424.0524; found: 424.0528.

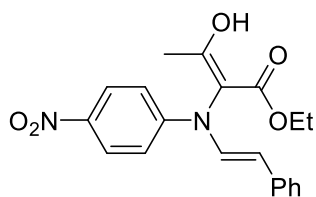

**Ethyl (*E*)-3-hydroxy-2-((4-nitrophenyl)((*E*)-styryl)amino)but-2-enoate (3ja)** : Colorless oil was isolated as single diastereoisomer by flash column chromatography (petroleum/ethyl acetate =20/1) in 98% yield (144.2 mg).  $^1\text{H NMR}$  (400 MHz, Chloroform-*d*)  $\delta$  12.70 (s, 1H), 8.19 (d,  $J$  = 8.7 Hz, 2H), 7.42 (d,  $J$  = 13.8 Hz, 1H), 7.32 (d,  $J$  = 7.2 Hz, 4H), 7.20 (d,  $J$  = 6.4 Hz, 1H), 6.99 (d,  $J$  = 8.7 Hz, 2H), 5.91 (d,  $J$  = 13.8 Hz, 1H), 4.21 (q,  $J$  = 7.1 Hz, 2H), 1.93 (s, 3H), 1.13 (t,  $J$  = 7.0 Hz, 3H).  $^{13}\text{C NMR}$  (101 MHz,  $\text{CDCl}_3$ )  $\delta$  176.81, 170.31, 150.67, 140.92, 136.63, 129.09, 128.77, 126.32, 125.92, 125.30, 114.31, 111.72, 104.89, 61.41, 17.62, 14.13. **HRMS** (ESI)  $m/z$ .  $[\text{M}+\text{Na}]^+$  calcd for  $\text{C}_{20}\text{H}_{20}\text{N}_2\text{O}_5\text{Na}$ : 391.1270; found: 391.1267.

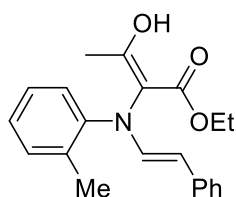

**Ethyl (*E*)-3-hydroxy-2-(((*E*)-styryl)(*o*-tolyl)amino)but-2-enoate (3ka)** : Colorless oil was isolated as single diastereoisomer by flash column chromatography (petroleum/ethyl acetate =20/1) in 83% yield (111.9 mg).  $^1\text{H NMR}$  (400 MHz, Chloroform-*d*)  $\delta$  12.60 (s, 1H), 7.28 – 7.11 (m, 6H), 7.12 – 6.98 (m, 3H), 6.94 (d,  $J$  = 14.0 Hz, 1H), 5.42 (d,  $J$  = 14.0 Hz, 1H), 4.32 – 4.07 (m, 2H), 2.37 (s, 3H), 2.06 (s, 3H), 1.16 (t,  $J$  = 7.2 Hz, 3H).  $^{13}\text{C NMR}$  (101 MHz,  $\text{CDCl}_3$ )  $\delta$  175.41, 171.60, 145.13, 138.70, 136.26, 132.04, 131.67, 128.59, 126.49, 124.43, 124.24, 124.17, 123.57, 108.86, 103.81, 61.00, 19.44, 18.58, 14.04. **HRMS** (ESI)  $m/z$ .  $[\text{M}+\text{Na}]^+$  calcd for  $\text{C}_{21}\text{H}_{23}\text{NO}_3\text{Na}$ : 360.1576; found: 360.1577.

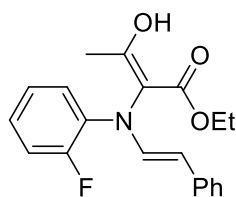

**Ethyl (*E*)-2-((2-fluorophenyl)((*E*)-styryl)amino)-3-hydroxybut-2-enoate (3la)** : Colorless oil was isolated as single diastereoisomer by flash column chromatography (petroleum/ethyl acetate =20/1) in 81% yield (110.3 mg).  $^1\text{H NMR}$  (400 MHz, Chloroform-*d*)  $\delta$  12.53 (s, 1H), 7.22 (d,  $J$  = 4.4 Hz, 4H), 7.15 – 6.91 (m, 6H), 5.54 (d,  $J$  = 13.9 Hz, 1H), 4.39 – 4.05 (m, 2H), 1.99 (s, 3H), 1.13 (t,  $J$  = 7.1 Hz, 3H).  $^{13}\text{C NMR}$  (101 MHz,  $\text{CDCl}_3$ )  $\delta$  176.32, 171.27, 156.49, 154.02, 138.16, 134.60 (d,  $J$  = 3.8 Hz), 128.59, 124.82, 124.59, 124.39 (d,  $J$  = 3.7 Hz), 124.02 (d,  $J$  = 7.6 Hz), 123.59, 116.88 (d,  $J$  = 20.7 Hz), 107.04, 105.16, 60.96, 17.88, 14.09.  $^{19}\text{F NMR}$  (376 MHz,  $\text{CDCl}_3$ )  $\delta$  -124.16. **HRMS** (ESI)  $m/z$ .  $[\text{M}+\text{Na}]^+$  calcd for  $\text{C}_{20}\text{H}_{20}\text{FNO}_3\text{Na}$ : 364.1325; found: 364.1320.

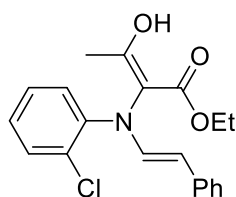

**Ethyl (*E*)-2-((2-chlorophenyl)((*E*)-styryl)amino)-3-hydroxybut-2-enoate (3ma)** : Colorless oil was isolated as single diastereoisomer by flash column chromatography (petroleum/ethyl acetate =20/1) in 87% yield (124.3 mg).  $^1\text{H NMR}$  (400 MHz, Chloroform-*d*)  $\delta$  12.58 (s, 1H), 7.35 (d,  $J$  = 8.0 Hz, 1H), 7.25 – 7.14 (m, 5H), 7.13 – 6.96 (m, 4H), 5.50 (d,  $J$  = 14.0 Hz, 1H), 4.18 (q,  $J$  = 7.1 Hz, 2H), 2.00 (s, 3H), 1.13 (t,  $J$  = 7.1 Hz, 3H).  $^{13}\text{C NMR}$  (101 MHz,  $\text{CDCl}_3$ )  $\delta$  176.32, 171.37, 143.76, 138.26, 135.45, 131.36, 128.59, 127.36, 125.25, 124.80, 124.53, 107.57, 105.30, 61.01, 18.45, 14.12. **HRMS** (ESI)  $m/z$ .  $[\text{M}+\text{Na}]^+$  calcd for  $\text{C}_{20}\text{H}_{20}\text{ClNO}_3\text{Na}$ : 380.1029; found: 380.1030.

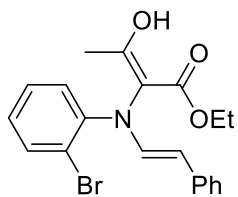

**Ethyl (E)-2-((2-bromophenyl)((E)-styryl)amino)-3-hydroxybut-2-enoate (3na)** : Colorless oil was isolated as single diastereoisomer by flash column chromatography (petroleum/ethyl acetate =20/1) in 89% yield (142.5 mg).  $^1\text{H NMR}$  (400 MHz, Chloroform-*d*)  $\delta$  12.64 (s, 1H), 7.60 (dd,  $J = 8.0, 1.5$  Hz, 1H), 7.30 – 7.21 (m, 5H), 7.15 – 7.04 (m, 3H), 7.02 – 6.93 (m, 1H), 5.53 (d,  $J = 14.0$  Hz, 1H), 4.23 (qd,  $J = 7.1, 2.1$  Hz, 2H), 2.06 (s, 3H), 1.19 (t,  $J = 7.1$  Hz, 3H).  $^{13}\text{C NMR}$  (101 MHz,  $\text{CDCl}_3$ )  $\delta$  176.34, 171.37, 145.14, 138.28, 135.68, 134.78, 128.58, 127.98, 125.29, 125.11, 124.80, 124.50, 116.57, 107.72, 105.44, 61.03, 18.68, 14.16. **HRMS** (ESI)  $m/z$ .  $[\text{M}+\text{Na}]^+$  calcd for  $\text{C}_{20}\text{H}_{20}\text{BrNO}_3\text{Na}$ : 424.0524; found: 424.0522.

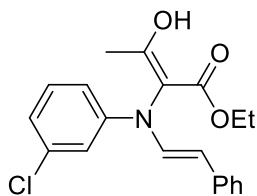

**Ethyl (E)-2-((3-chlorophenyl)((E)-styryl)amino)-3-hydroxybut-2-enoate (3oa)** : Colorless oil was isolated as single diastereoisomer by flash column chromatography (petroleum/ethyl acetate =20/1) in 93% yield (132.5 mg).  $^1\text{H NMR}$  (400 MHz, Chloroform-*d*)  $\delta$  12.62 (s, 1H), 7.38 – 6.99 (m, 7H), 6.99 – 6.61 (m, 3H), 5.67 (d,  $J = 13.7$  Hz, 1H), 4.16 (q,  $J = 7.1$  Hz, 2H), 1.90 (s, 3H), 1.10 (t,  $J = 7.1$  Hz, 3H).  $^{13}\text{C NMR}$  (101 MHz,  $\text{CDCl}_3$ )  $\delta$  176.65, 170.92, 147.16, 137.66, 135.23, 130.61, 130.34, 128.67, 125.39, 124.85, 120.98, 115.95, 114.03, 108.01, 105.34, 61.12, 17.66, 14.15. **HRMS** (ESI)  $m/z$ .  $[\text{M}+\text{Na}]^+$  calcd for  $\text{C}_{20}\text{H}_{20}\text{ClNO}_3\text{Na}$ : 380.1029; found: 380.1025.

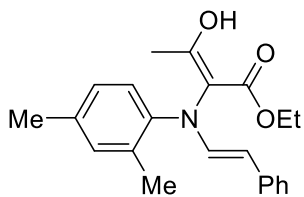

**Ethyl (E)-2-((2,4-dimethylphenyl)((E)-styryl)amino)-3-hydroxybut-2-enoate (3pa)** : Colorless oil was isolated as single diastereoisomer by flash column chromatography (petroleum/ethyl acetate =20/1) in 91% yield (127.6 mg).  $^1\text{H NMR}$  (400 MHz, Chloroform-*d*)  $\delta$  12.56 (s, 1H), 7.21 (d,  $J = 6.6$  Hz, 4H), 7.02 (d,  $J = 11.3$  Hz, 2H), 6.97 – 6.81 (m, 3H), 5.35 (d,  $J = 14.0$  Hz, 1H), 4.45 – 4.05 (m, 2H), 2.32 (s, 3H), 2.30 (s, 3H), 2.05 (s, 3H), 1.16 (t,  $J = 7.2$  Hz, 4H).  $^{13}\text{C NMR}$  (101 MHz,  $\text{CDCl}_3$ )  $\delta$  175.28, 171.65, 142.56, 138.84, 136.53, 133.84, 132.56, 131.61, 128.56, 127.09, 124.25, 124.07, 123.56, 109.03, 103.22, 60.98, 20.70, 19.25, 18.58, 14.05. **HRMS** (ESI)  $m/z$ .  $[\text{M}+\text{Na}]^+$  calcd for  $\text{C}_{22}\text{H}_{25}\text{NO}_3\text{Na}$ : 374.1732; found: 374.1724.



#### 4. Typical procedure for the synthesis of pyrroles:

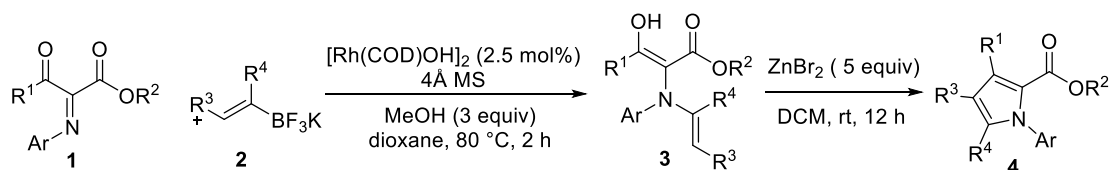

Under argon atmosphere, a mixture of  $[\text{Rh}(\text{OH})(\text{COD})]_2$  (0.01 mmol, 2.5mol %), ketimine (0.4 mmol), potassium alkenyltrifluoroborates (0.8 mmol, 2 equiv), and 4Å MS was added MeOH (1.2 mmol, 3 equiv) and dioxane (2 mL), The mixture was stirred at 80 °C for 2 hours. Cool the mixture to rt and then  $\text{ZnBr}_2$  (2 mmol, 5 equiv) was added. The mixture was stirred at rt for 12 h. After the reaction was completed, the mixture was filtered through a thin-layer of celite. The filtrate was concentrated under reduced pressure. The residue was purified by flash chromatography on silica gel (eluent: EtOAc/petroleum ether = 1/20 to 1/10) to afford product as white solid or colorless oil.

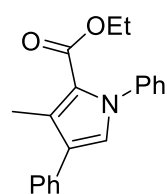

**Ethyl 3-methyl-1,4-diphenyl-1H-pyrrole-2-carboxylate (4aa)** : Colorless oil was isolated as single diastereoisomer by flash column chromatography (petroleum/ethyl acetate =10/1) in 84% yield (102.3 mg).  $^1\text{H NMR}$  (400 MHz, Chloroform-*d*)  $\delta$  7.41 (q,  $J$  = 6.6, 5.0 Hz, 7H), 7.31 (t,  $J$  = 5.4 Hz, 3H), 6.96 (s, 1H), 4.14 (q,  $J$  = 7.1 Hz, 2H), 2.48 (s, 3H), 1.10 (t,  $J$  = 7.1 Hz, 3H).  $^{13}\text{C NMR}$  (101 MHz,  $\text{CDCl}_3$ )  $\delta$  161.45, 141.38, 134.80, 128.62, 128.57, 128.47, 128.00, 127.46, 126.73, 126.42, 126.39, 126.09, 121.69, 59.77, 14.03, 12.11. **HRMS** (ESI)  $m/z$ .  $[\text{M}+\text{Na}]^+$  calcd for  $\text{C}_{20}\text{H}_{19}\text{NO}_2\text{Na}$ : 328.1313; found: 328.1301.

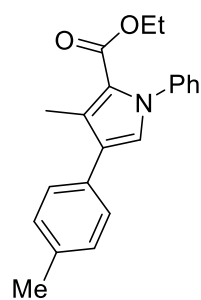

**Ethyl 3-methyl-1-phenyl-4-(p-tolyl)-1H-pyrrole-2-carboxylate (4ab)** : Colorless oil was isolated as single diastereoisomer by flash column chromatography (petroleum/ethyl acetate =10/1) in 82% yield (104.5 mg).  $^1\text{H NMR}$  (400 MHz, Chloroform-*d*)  $\delta$  7.41 (dt,  $J$  = 13.6, 6.7 Hz, 3H), 7.32 (d,  $J$  = 7.7 Hz, 4H), 7.23 (d,  $J$  = 7.8 Hz, 2H), 6.95 (s, 1H), 4.15 (q,  $J$  = 7.1 Hz, 2H), 2.49 (s, 3H), 2.40 (s, 3H), 1.12 (t,  $J$  = 7.1 Hz, 3H).  $^{13}\text{C NMR}$  (101 MHz,  $\text{CDCl}_3$ )  $\delta$  161.49, 141.44, 136.06, 131.82, 129.21, 128.57, 128.53, 128.05, 127.42, 126.66, 126.37, 126.11, 121.59, 59.75, 21.18, 14.05, 12.14. **HRMS** (ESI)  $m/z$ .  $[\text{M}+\text{Na}]^+$  calcd for  $\text{C}_{21}\text{H}_{21}\text{NO}_2\text{Na}$ : 342.1470; found: 342.1466.

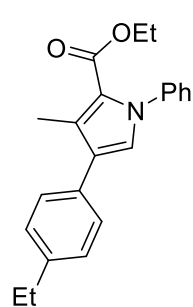

**Ethyl 4-(4-ethylphenyl)-3-methyl-1-phenyl-1H-pyrrole-2-carboxylate (4ac)** : Colorless oil was isolated as single diastereoisomer by flash column chromatography (petroleum/ethyl acetate =10/1) in 80% yield (106.5 mg).  $^1\text{H NMR}$  (400 MHz, Chloroform-*d*)  $\delta$  7.49 – 7.30 (m, 7H), 7.27 (d,  $J$  = 7.7 Hz, 2H), 6.96 (s, 1H), 4.17 (q,  $J$  = 7.1 Hz, 2H), 2.71 (q,  $J$  = 7.6 Hz, 2H), 2.51 (s, 3H), 1.31 (t,  $J$  = 7.6 Hz, 3H), 1.13 (t,  $J$  = 7.1 Hz, 3H).  $^{13}\text{C NMR}$  (101 MHz,  $\text{CDCl}_3$ )  $\delta$  161.49, 142.42, 141.46, 132.09, 128.59, 128.57, 128.07, 128.00, 127.42, 126.69, 126.41, 126.12, 121.60, 59.75, 28.59, 15.60, 14.07, 12.17. **HRMS** (ESI)  $m/z$ .  $[\text{M}+\text{Na}]^+$  calcd for  $\text{C}_{22}\text{H}_{23}\text{NO}_2\text{Na}$ : 356.1626; found: 356.1625.

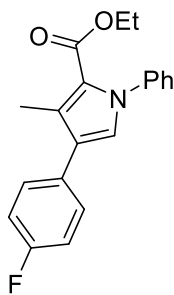

**Ethyl 4-(4-fluorophenyl)-3-methyl-1-phenyl-1H-pyrrole-2-carboxylate (4ad)** : Colorless oil was isolated as single diastereoisomer by flash column chromatography (petroleum/ethyl acetate =10/1) in 77% yield (99.5 mg).  $^1\text{H NMR}$  (400 MHz, Chloroform-*d*)  $\delta$  7.50 – 7.28 (m, 7H), 7.10 (t,  $J$  = 8.7 Hz, 2H), 6.93 (s, 1H), 4.15 (q,  $J$  = 7.1 Hz, 2H), 2.47 (s, 3H), 1.11 (t,  $J$  = 7.1 Hz, 3H).  $^{13}\text{C NMR}$  (101 MHz,  $\text{CDCl}_3$ )  $\delta$  161.77 (d,  $J$  = 245.4 Hz), 161.39, 141.31, 130.79 (d,  $J$  = 3.1 Hz), 130.14 (d,  $J$  = 7.9 Hz), 128.60, 127.85, 127.53, 126.57, 126.09, 125.48, 121.70, 115.35 (d,  $J$  = 21.3 Hz), 59.81, 14.03, 12.02.  $^{19}\text{F NMR}$  (376 MHz,  $\text{CDCl}_3$ )  $\delta$  -116.39. **HRMS** (ESI)  $m/z$ .  $[\text{M}+\text{Na}]^+$  calcd for  $\text{C}_{20}\text{H}_{18}\text{FNO}_2\text{Na}$ : 346.1219; found: 346.1219.

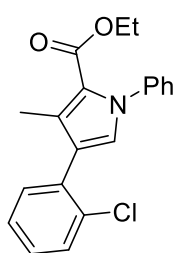

**Ethyl 4-(2-chlorophenyl)-3-methyl-1-phenyl-1H-pyrrole-2-carboxylate (4ae)** : Colorless oil was isolated as single diastereoisomer by flash column chromatography (petroleum/ethyl acetate =10/1) in 80% yield (108.1 mg).  $^1\text{H NMR}$  (400 MHz, Chloroform-*d*)  $\delta$  7.57 – 7.23 (m, 9H), 6.96 (s, 1H), 4.17 (q,  $J$  = 7.1 Hz, 2H), 2.33 (s, 3H), 1.14 (t,  $J$  = 7.1 Hz, 3H).  $^{13}\text{C NMR}$  (101 MHz,  $\text{CDCl}_3$ )  $\delta$  161.41, 141.26, 134.28, 133.55, 132.43, 129.72, 129.49, 128.55, 128.39, 127.82, 127.50, 126.49, 126.18, 123.47, 120.94, 59.77, 14.10, 12.26. **HRMS** (ESI)  $m/z$ .  $[\text{M}+\text{Na}]^+$  calcd for  $\text{C}_{20}\text{H}_{18}\text{ClNO}_2\text{Na}$ : 362.0924; found: 362.0920.

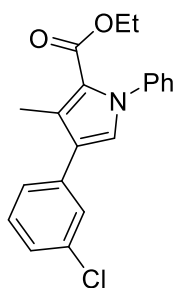

**Ethyl 4-(3-chlorophenyl)-3-methyl-1-phenyl-1H-pyrrole-2-carboxylate (4af)** : Colorless oil was isolated as single diastereoisomer by flash column chromatography (petroleum/ethyl acetate =10/1) in 82% yield (111.0 mg).  $^1\text{H NMR}$  (400 MHz, Chloroform-*d*)  $\delta$  7.50 – 7.36 (m, 4H), 7.36 – 7.21 (m, 5H), 6.96 (s, 1H), 4.16 (q,  $J$  = 7.1 Hz, 2H), 2.49 (s, 3H), 1.11 (t,  $J$  = 7.1 Hz, 3H).  $^{13}\text{C NMR}$  (101 MHz,  $\text{CDCl}_3$ )  $\delta$  161.33, 141.22, 136.71, 134.30, 129.71, 128.64, 128.51, 127.81, 127.63, 126.76, 126.69, 126.43, 126.08, 125.10, 121.96, 59.87, 14.04, 12.08. **HRMS** (ESI)  $m/z$ .  $[\text{M}+\text{Na}]^+$  calcd for  $\text{C}_{20}\text{H}_{18}\text{ClNO}_2\text{Na}$ : 362.0924; found: 362.0923.

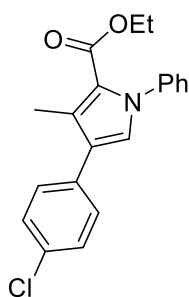

**Ethyl 4-(4-chlorophenyl)-3-methyl-1-phenyl-1H-pyrrole-2-carboxylate (4ag)** : Colorless oil was isolated as single diastereoisomer by flash column chromatography (petroleum/ethyl acetate =10/1) in 82% yield (111.3 mg).  $^1\text{H NMR}$  (400 MHz, Chloroform-*d*)  $\delta$  7.48 – 7.27 (m, 9H), 6.94 (s, 1H), 4.14 (q,  $J$  = 7.1 Hz, 2H), 2.46 (s, 3H), 1.10 (t,  $J$  = 7.1 Hz, 3H).  $^{13}\text{C NMR}$  (101 MHz,  $\text{CDCl}_3$ )  $\delta$  161.33, 141.26, 133.29, 132.30, 129.81, 128.64, 128.61, 127.77, 127.58, 126.58, 126.08, 125.25, 121.91, 59.83, 14.01, 12.03. **HRMS** (ESI)  $m/z$ .  $[\text{M}+\text{Na}]^+$  calcd for  $\text{C}_{20}\text{H}_{18}\text{ClNO}_2\text{Na}$ : 362.0924; found: 362.0921.

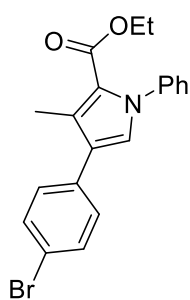

found: 406.0413.

**Ethyl 4-(4-bromophenyl)-3-methyl-1-phenyl-1H-pyrrole-2-carboxylate (4ah)**

: Colorless oil was isolated as single diastereoisomer by flash column chromatography (petroleum/ethyl acetate =10/1) in 80% yield (122.3 mg).  $^1\text{H NMR}$  (400 MHz, Chloroform-*d*)  $\delta$  7.52 (d,  $J$  = 8.4 Hz, 2H), 7.46 – 7.35 (m, 3H), 7.33 – 7.22 (m, 4H), 6.94 (s, 1H), 4.14 (q,  $J$  = 7.1 Hz, 2H), 2.46 (s, 3H), 1.10 (t,  $J$  = 7.1 Hz, 3H).  $^{13}\text{C NMR}$  (101 MHz,  $\text{CDCl}_3$ )  $\delta$  161.32, 141.24, 133.77, 131.60, 130.16, 128.62, 127.73, 127.61, 126.55, 126.08, 125.24, 121.93, 120.38, 59.85, 14.03, 12.06. **HRMS** (ESI)  $m/z$ .  $[\text{M}+\text{Na}]^+$  calcd for  $\text{C}_{20}\text{H}_{18}\text{BrNO}_2\text{Na}$ : 406.0419;

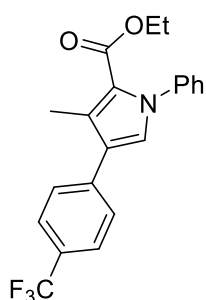

found: 406.0413.

**Ethyl 3-methyl-1-phenyl-4-(4-(trifluoromethyl)phenyl)-1H-pyrrole-2-carboxylate (4ai)**

: Colorless oil was isolated as single diastereoisomer by flash column chromatography (petroleum/ethyl acetate =10/1) in 79% yield (117.9 mg).  $^1\text{H NMR}$  (400 MHz, Chloroform-*d*)  $\delta$  7.67 (d,  $J$  = 8.1 Hz, 2H), 7.53 (d,  $J$  = 8.0 Hz, 2H), 7.42 (dd,  $J$  = 11.0, 7.1 Hz, 3H), 7.32 (d,  $J$  = 6.8 Hz, 2H), 7.00 (s, 1H), 4.16 (q,  $J$  = 7.1 Hz, 2H), 2.51 (s, 3H), 1.11 (t,  $J$  = 7.1 Hz, 3H).  $^{13}\text{C NMR}$  (101 MHz,  $\text{CDCl}_3$ )  $\delta$  161.28, 141.16, 138.60 (d,  $J$  = 1.5 Hz), 128.64 (d,  $J$  = 5.5 Hz), 128.37 (d,  $J$  = 32.3 Hz), 127.77, 127.71, 126.84, 126.08, 125.76,

125.43 (q,  $J$  = 3.8 Hz), 125.07, 123.06, 122.21, 59.92, 13.99, 12.07.  $^{19}\text{F NMR}$  (376 MHz,  $\text{CDCl}_3$ )  $\delta$  -62.29. **HRMS** (ESI)  $m/z$ .  $[\text{M}+\text{Na}]^+$  calcd for:  $\text{C}_{21}\text{H}_{18}\text{F}_3\text{NO}_2\text{Na}$ : 396.1187; found: 396.1188.

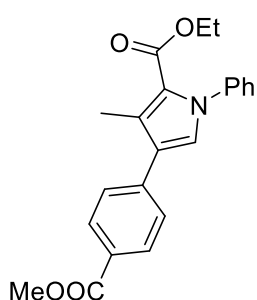

found: 406.0413.

**Ethyl 3-methyl-1-phenyl-4-(4-(trifluoromethyl)phenyl)-1H-pyrrole-2-carboxylate (4aj)**

: Colorless oil was isolated as single diastereoisomer by flash column chromatography (petroleum/ethyl acetate =10/1) in 79% yield (114.5 mg).  $^1\text{H NMR}$  (400 MHz, Chloroform-*d*)  $\delta$  8.07 (d,  $J$  = 8.3 Hz, 2H), 7.49 (d,  $J$  = 8.3 Hz, 2H), 7.46 – 7.35 (m, 3H), 7.31 (d,  $J$  = 6.6 Hz, 2H), 7.02 (s, 1H), 4.14 (q,  $J$  = 7.1 Hz, 2H), 3.93 (s, 3H), 2.50 (s, 3H), 1.09 (t,  $J$  = 7.1 Hz, 3H).  $^{13}\text{C NMR}$  (101 MHz,  $\text{CDCl}_3$ )  $\delta$  167.08, 161.29, 141.19, 139.71, 129.84, 128.63, 128.18, 127.91, 127.87, 127.66, 126.96, 126.06,

125.37, 122.24, 59.88, 52.06, 13.99, 12.17. **HRMS** (ESI)  $m/z$ .  $[\text{M}+\text{Na}]^+$  calcd for  $\text{C}_{22}\text{H}_{21}\text{NO}_4\text{Na}$ : 386.1368; found: 386.1357.

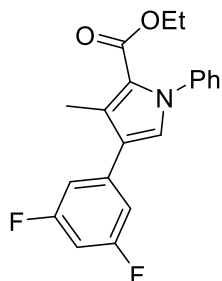

found: 406.0413.

**Ethyl 4-(3,5-difluorophenyl)-3-methyl-1-phenyl-1H-pyrrole-2-carboxylate (4ak)**

: Colorless oil was isolated as single diastereoisomer by flash column chromatography (petroleum/ethyl acetate =10/1) in 76% yield (103.9 mg).  $^1\text{H NMR}$  (400 MHz, Chloroform-*d*)  $\delta$  7.50 – 7.35 (m, 3H), 7.30 (d,  $J$  = 6.8 Hz, 2H), 6.97 (s, 1H), 6.93 (d,  $J$  = 6.3 Hz, 2H), 6.73 (t,  $J$  = 9.0 Hz, 1H), 4.14 (q,  $J$  = 7.1 Hz, 2H), 2.49 (s, 3H), 1.10 (t,  $J$  = 7.1 Hz, 3H).  $^{13}\text{C NMR}$  (101 MHz,  $\text{CDCl}_3$ )  $\delta$  163.07 (dd,  $J$  = 247.4, 13.4 Hz), 161.21, 141.07, 138.15 (t,  $J$  = 10.3 Hz), 128.66, 127.75, 127.55, 126.72, 126.05, 124.39 (t,  $J$  = 2.6

Hz), 122.22, 112.05 – 109.10 (m), 101.62 (t,  $J$  = 25.4 Hz), 59.94, 13.98, 12.01.  $^{19}\text{F NMR}$  (376 MHz,  $\text{CDCl}_3$ )  $\delta$  -110.33. **HRMS** (ESI)  $m/z$ .  $[\text{M}+\text{Na}]^+$  calcd for  $\text{C}_{20}\text{H}_{17}\text{F}_2\text{NO}_2\text{Na}$ : 364.1125; found: 364.1120.

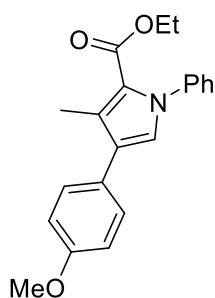

**Ethyl 4-(4-methoxyphenyl)-3-methyl-1-phenyl-1H-pyrrole-2-carboxylate**

**(4ap)** : Colorless oil was isolated as single diastereoisomer by flash column chromatography (petroleum/ethyl acetate =10/1) in 82% yield (109.6 mg). <sup>1</sup>H NMR (400 MHz, Chloroform-*d*) δ 7.42 (q, *J* = 7.4 Hz, 3H), 7.36 – 7.28 (m, 4H), 6.96 (d, *J* = 8.5 Hz, 2H), 6.92 (s, 1H), 4.15 (q, *J* = 7.1 Hz, 2H), 3.85 (s, 3H), 2.47 (s, 3H), 1.11 (t, *J* = 7.1 Hz, 3H). <sup>13</sup>C NMR (101 MHz, CDCl<sub>3</sub>) δ 161.47, 158.38, 141.44, 129.75, 128.56, 128.00, 127.40, 127.23, 126.50, 126.10, 121.49, 113.95, 59.73, 55.31, 14.05, 12.10. HRMS (ESI) *m/z*.

[M+Na]<sup>+</sup> calcd for C<sub>21</sub>H<sub>21</sub>NO<sub>3</sub>Na: 358.1419; found: 358.1411.

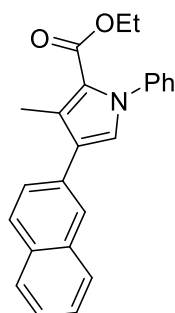

**Ethyl 3-methyl-4-(naphthalen-2-yl)-1-phenyl-1H-pyrrole-2-carboxylate**

**(4am)** : Colorless oil was isolated as single diastereoisomer by flash column chromatography (petroleum/ethyl acetate =10/1) in 83% yield (117.4 mg). <sup>1</sup>H NMR (400 MHz, Chloroform-*d*) δ 7.97 – 7.83 (m, 4H), 7.59 (d, *J* = 9.9 Hz, 1H), 7.55 – 7.31 (m, 5H), 7.09 (s, 2H), 4.19 (q, *J* = 7.1 Hz, 2H), 2.60 (s, 3H), 1.15 (t, *J* = 7.1 Hz, 3H). <sup>13</sup>C NMR (101 MHz, CDCl<sub>3</sub>) δ 161.49, 141.42, 133.66, 132.33, 132.14, 128.64, 128.23, 128.03, 127.88, 127.72, 127.54, 127.34, 127.05, 126.88, 126.40, 126.21, 126.15, 125.63, 121.88, 59.84, 14.09, 12.32. HRMS (ESI) *m/z*.

[M+Na]<sup>+</sup> calcd for C<sub>24</sub>H<sub>21</sub>NO<sub>2</sub>Na: 378.1470; found: 378.1466.

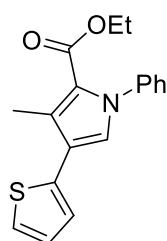

**Ethyl ethyl 3-methyl-1-phenyl-4-(thiophen-2-yl)-1H-pyrrole-2-carboxylate**

**(4an)** : Colorless oil was isolated as single diastereoisomer by flash column chromatography (petroleum/ethyl acetate =10/1) in 76% yield (94.7 mg). <sup>1</sup>H NMR (400 MHz, Chloroform-*d*) δ 7.40 (dd, *J* = 10.8, 7.2 Hz, 3H), 7.29 (d, *J* = 6.8 Hz, 2H), 7.24 (d, *J* = 5.1 Hz, 1H), 7.08 (t, *J* = 5.0 Hz, 2H), 7.03 (s, 1H), 4.13 (q, *J* = 7.1 Hz, 2H), 2.55 (s, 3H), 1.09 (t, *J* = 7.1 Hz, 3H). <sup>13</sup>C NMR (101 MHz, CDCl<sub>3</sub>) δ 161.27, 141.17, 136.55, 128.60, 127.98, 127.62, 127.45, 126.74, 126.11, 124.34,

123.68, 121.92, 119.37, 59.84, 13.98, 12.08. HRMS (ESI) *m/z*. [M+Na]<sup>+</sup> calcd for C<sub>18</sub>H<sub>17</sub>NO<sub>2</sub>SNa: 334.0878; found: 334.0874.

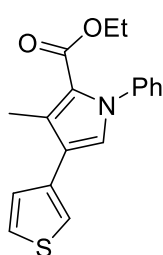

**Ethyl 3-methyl-1-phenyl-4-(thiophen-3-yl)-1H-pyrrole-2-carboxylate**

**(4ao)** : Colorless oil was isolated as single diastereoisomer by flash column chromatography (petroleum/ethyl acetate =10/1) in 73% yield (90.6 mg). <sup>1</sup>H NMR (400 MHz, Chloroform-*d*) δ 7.47 – 7.34 (m, 4H), 7.34 – 7.28 (m, 2H), 7.26 – 7.23 (m, 1H), 7.21 (d, *J* = 5.0 Hz, 1H), 7.00 (s, 1H), 4.15 (q, *J* = 7.1 Hz, 2H), 2.54 (s, 3H), 1.11 (t, *J* = 7.1 Hz, 3H). <sup>13</sup>C NMR (101 MHz, CDCl<sub>3</sub>) δ 161.41, 141.36, 135.07, 128.60, 128.00, 127.92, 127.51, 126.60, 126.13, 125.39, 121.68, 121.26,

120.39, 59.80, 14.03, 12.28. HRMS (ESI) *m/z*. [M+Na]<sup>+</sup> calcd for C<sub>18</sub>H<sub>17</sub>NO<sub>2</sub>SNa: 334.0878; found: 334.0877.

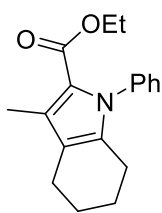

**Ethyl 3-methyl-1-phenyl-4,5,6,7-tetrahydro-1H-indole-2-carboxylate (4aq)** : Colorless oil was isolated as single diastereoisomer by flash column chromatography (petroleum/ethyl acetate =10/1) in 63% yield (71.1 mg). **<sup>1</sup>H NMR** (400 MHz, Chloroform-*d*)  $\delta$  7.37 (dd,  $J = 12.2, 7.3$  Hz, 3H), 7.17 (d,  $J = 6.8$  Hz, 2H), 4.05 (q,  $J = 7.1$  Hz, 2H), 2.47 (t,  $J = 5.8$  Hz, 2H), 2.31 (s, 3H), 2.24 (t,  $J = 5.8$  Hz, 2H), 1.75 (q,  $J = 7.8$  Hz, 4H), 1.04 (t,  $J = 7.1$  Hz, 3H). **<sup>13</sup>C NMR** (101 MHz, CDCl<sub>3</sub>)  $\delta$  161.55, 140.10, 136.04, 128.45, 127.93, 127.64, 127.35, 119.76, 118.94, 59.06, 23.26, 23.03, 22.93, 21.21, 14.05, 10.97. **HRMS** (ESI) *m/z*. [M+Na]<sup>+</sup> calcd for C<sub>18</sub>H<sub>21</sub>NO<sub>2</sub>Na: 306.1470; found: 306.1461.

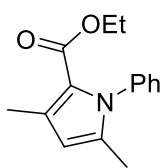

**Ethyl 3,5-dimethyl-1-phenyl-1H-pyrrole-2-carboxylate (4ar)** : Colorless oil was isolated as single diastereoisomer by flash column chromatography (petroleum/ethyl acetate =10/1) in 51% yield (49.3 mg). **<sup>1</sup>H NMR** (400 MHz, Chloroform-*d*)  $\delta$  7.41 (q,  $J = 7.9, 7.2$  Hz, 3H), 7.17 (d,  $J = 6.2$  Hz, 2H), 5.92 (s, 1H), 4.04 (q,  $J = 7.1$  Hz, 2H), 2.38 (s, 3H), 1.97 (s, 3H), 1.05 (t,  $J = 7.1$  Hz, 3H). **<sup>13</sup>C NMR** (101 MHz, CDCl<sub>3</sub>)  $\delta$  161.29, 140.32, 136.04, 130.26, 128.58, 127.87, 127.73, 120.70, 111.11, 59.13, 14.03, 13.80, 12.83. **HRMS** (ESI) *m/z*. [M+Na]<sup>+</sup> calcd for C<sub>15</sub>H<sub>17</sub>NO<sub>2</sub>Na: 266.1157; found: 266.1150.

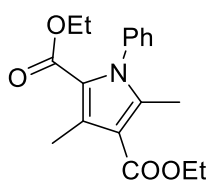

**Diethyl 3,5-dimethyl-1-phenyl-1H-pyrrole-2,4-dicarboxylate (4as)** : Colorless oil was isolated as single diastereoisomer by flash column chromatography (petroleum/ethyl acetate =10/1) in 54% yield (68.3 mg). **<sup>1</sup>H NMR** (400 MHz, Chloroform-*d*)  $\delta$  7.44 (dd,  $J = 5.3, 1.8$  Hz, 3H), 7.21 – 6.94 (m, 2H), 4.32 (q,  $J = 7.1$  Hz, 2H), 4.02 (q,  $J = 7.1$  Hz, 2H), 2.62 (s, 3H), 2.23 (s, 3H), 1.37 (t,  $J = 7.1$  Hz, 3H), 0.99 (t,  $J = 7.1$  Hz, 3H). **<sup>13</sup>C NMR** (101 MHz, CDCl<sub>3</sub>)  $\delta$  165.62, 161.11, 141.69, 139.43, 131.58, 128.83, 128.33, 127.77, 121.78, 113.34, 59.67, 14.46, 13.82, 12.98, 12.39. **HRMS** (ESI) *m/z*. [M+Na]<sup>+</sup> calcd for C<sub>18</sub>H<sub>21</sub>NO<sub>4</sub>Na: 338.1368; found: 338.1363.

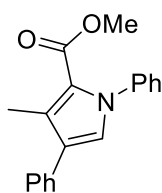

**Methyl 3-methyl-1,4-diphenyl-1H-pyrrole-2-carboxylate (4ba)** : Colorless oil was isolated as single diastereoisomer by flash column chromatography (petroleum/ethyl acetate =10/1) in 84% yield (97.6 mg). **<sup>1</sup>H NMR** (400 MHz, Chloroform-*d*)  $\delta$  7.52 – 7.37 (m, 7H), 7.34 (d,  $J = 7.2$  Hz, 3H), 6.99 (s, 1H), 3.72 (s, 3H), 2.51 (s, 3H). **<sup>13</sup>C NMR** (101 MHz, CDCl<sub>3</sub>)  $\delta$  161.96, 141.24, 134.77, 128.67, 128.65, 128.51, 128.07, 127.54, 127.05, 126.51, 126.46, 126.02, 121.46, 50.92, 12.22. **HRMS** (ESI) *m/z*. [M+Na]<sup>+</sup> calcd for C<sub>19</sub>H<sub>17</sub>NO<sub>2</sub>Na: 314.1157; found: 314.1150.

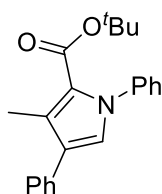

**Tert-butyl 3-methyl-1,4-diphenyl-1H-pyrrole-2-carboxylate (4ca)** : Colorless oil was isolated as single diastereoisomer by flash column chromatography (petroleum/ethyl acetate =10/1) in 79% yield (105.4 mg). **<sup>1</sup>H NMR** (400 MHz, Chloroform-*d*)  $\delta$  7.50 – 7.36 (m, 7H), 7.36 – 7.28 (m, 3H), 6.93 (s, 1H), 2.50 (s, 3H), 1.32 (s, 9H). **<sup>13</sup>C NMR** (101 MHz, CDCl<sub>3</sub>)  $\delta$  160.68, 141.75, 134.95, 128.65, 128.60, 128.47, 127.59, 127.29, 126.42, 126.33, 126.01, 125.92, 122.99, 80.52, 28.05, 11.99. **HRMS** (ESI) *m/z*. [M+Na]<sup>+</sup> calcd for C<sub>22</sub>H<sub>23</sub>NO<sub>2</sub>Na: 356.1626; found: 356.1625.

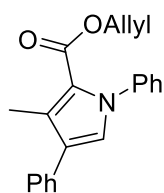

**Allyl 3-methyl-1,4-diphenyl-1H-pyrrole-2-carboxylate (4da)** : Colorless oil was isolated as single diastereoisomer by flash column chromatography (petroleum/ethyl acetate =10/1) in 67% yield (84.8 mg). <sup>1</sup>H NMR (400 MHz, Chloroform-*d*) δ 7.48 – 7.35 (m, 7H), 7.31 (t, *J* = 5.8 Hz, 3H), 6.98 (s, 1H), 5.78 (ddt, *J* = 16.3, 10.8, 5.6 Hz, 1H), 5.21 – 5.07 (m, 2H), 4.61 (d, *J* = 5.4 Hz, 2H), 2.50 (s, 3H). <sup>13</sup>C NMR (101 MHz, CDCl<sub>3</sub>) δ 161.08, 141.29, 134.73, 132.27, 129.42, 128.64, 128.47, 128.35, 127.52, 127.08, 126.53, 126.43, 126.06, 117.69, 114.24, 64.58, 12.22. HRMS (ESI) *m/z*. [M+Na]<sup>+</sup> calcd for C<sub>21</sub>H<sub>19</sub>NO<sub>2</sub>Na: 340.1313; found: 340.1308.

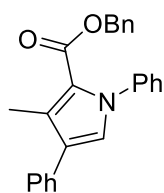

**Benzyl 3-methyl-1,4-diphenyl-1H-pyrrole-2-carboxylate (4ea)** : Colorless oil was isolated as single diastereoisomer by flash column chromatography (petroleum/ethyl acetate =10/1) in 81% yield (119.2 mg). <sup>1</sup>H NMR (400 MHz, Chloroform-*d*) δ 7.48 – 7.36 (m, 7H), 7.35 – 7.26 (m, 5H), 7.22 – 7.12 (m, 2H), 6.99 (s, 1H), 5.19 (s, 2H), 2.54 (s, 3H). <sup>13</sup>C NMR (101 MHz, CDCl<sub>3</sub>) δ 161.21, 141.32, 136.03, 134.72, 128.72, 128.67, 128.64, 128.52, 128.38, 128.13, 127.94, 127.55, 127.17, 126.59, 126.49, 126.09, 121.39, 65.75, 12.32. HRMS (ESI) *m/z*. [M+Na]<sup>+</sup> calcd for C<sub>25</sub>H<sub>21</sub>NO<sub>2</sub>Na: 390.1470; found: 390.1464.

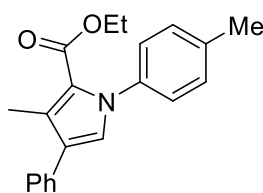

**Ethyl 3-methyl-4-phenyl-1-(p-tolyl)-1H-pyrrole-2-carboxylate (4ga)** : Colorless oil was isolated as single diastereoisomer by flash column chromatography (petroleum/ethyl acetate =10/1) in 85% yield (108.7 mg). <sup>1</sup>H NMR (400 MHz, Chloroform-*d*) δ 7.48 – 7.37 (m, 4H), 7.31 (dt, *J* = 5.9, 3.0 Hz, 1H), 7.27 – 7.17 (m, 4H), 6.97 (s, 1H), 4.20 (q, *J* = 7.1 Hz, 2H), 2.52 (s, 3H), 2.44 (s, 3H), 1.18 (t, *J* = 7.1 Hz, 3H). <sup>13</sup>C NMR (101 MHz, CDCl<sub>3</sub>) δ 161.53, 138.88, 137.33, 134.92, 129.19, 128.67, 128.49, 127.67, 126.89, 126.37, 126.27, 125.92, 121.71, 59.78, 21.17, 14.17, 12.22. HRMS (ESI) *m/z*. [M+Na]<sup>+</sup> calcd for C<sub>21</sub>H<sub>21</sub>NO<sub>2</sub>Na: 342.1470; found: 342.1475.

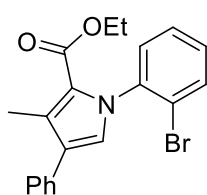

**Ethyl 1-(2-bromophenyl)-3-methyl-4-phenyl-1H-pyrrole-2-carboxylate (4na)** : Colorless oil was isolated as single diastereoisomer by flash column chromatography (petroleum/ethyl acetate =10/1) in 76% yield (116.6 mg). <sup>1</sup>H NMR (400 MHz, Chloroform-*d*) δ 7.67 (d, *J* = 8.0 Hz, 1H), 7.48 – 7.34 (m, 6H), 7.34 – 7.22 (m, 2H), 6.86 (s, 1H), 4.12 (p, *J* = 7.2 Hz, 2H), 2.53 (s, 3H), 1.08 (t, *J* = 7.1 Hz, 3H). <sup>13</sup>C NMR (101 MHz, CDCl<sub>3</sub>) δ 161.13, 141.11, 134.72, 132.77, 129.39, 129.03, 128.66, 128.46, 127.68, 127.52, 126.71, 126.43, 126.01, 122.38, 121.99, 59.71, 13.98, 12.17. HRMS (ESI) *m/z*. [M+Na]<sup>+</sup> calcd for C<sub>20</sub>H<sub>18</sub>NO<sub>2</sub>BrNa: 406.0419; found: 406.0415.

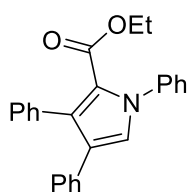

**Ethyl 1,3,4-triphenyl-1H-pyrrole-2-carboxylate (4qa)** : Colorless oil was isolated as single diastereoisomer by flash column chromatography (petroleum/ethyl acetate =10/1) in 88% yield (129.1 mg). <sup>1</sup>H NMR (400 MHz, Chloroform-*d*) δ 7.55 – 7.43 (m, 5H), 7.39 (q, *J* = 7.2, 6.7 Hz, 5H), 7.22 (q, *J* = 7.5, 6.5 Hz, 5H), 7.17 (s, 1H), 4.01 (q, *J* = 7.1 Hz, 2H), 0.89 (t, *J* = 7.1 Hz, 3H). <sup>13</sup>C NMR (101 MHz, CDCl<sub>3</sub>) δ 161.09, 141.00, 135.15, 134.27, 131.81, 130.90, 128.86, 128.30, 128.28, 127.81, 127.65, 126.92, 126.38, 126.21, 126.04, 125.56, 121.95, 60.03, 13.56. HRMS (ESI)

m/z.  $[M+Na]^+$  calcd for  $C_{25}H_{21}NO_2Na$ : 390.1470; found: 390.1467.

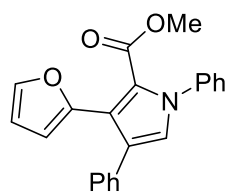

**Methyl 3-(furan-2-yl)-1,4-diphenyl-1H-pyrrole-2-carboxylate (4ra)** :

Colorless oil was isolated as single diastereoisomer by flash column chromatography (petroleum/ethyl acetate =10/1) in 83% yield (113.7 mg).

$^1H$  NMR (400 MHz, Chloroform-*d*)  $\delta$  7.54 – 7.45 (m, 4H), 7.42 (d,  $J$  = 6.6 Hz, 2H), 7.32 (d,  $J$  = 7.3 Hz, 2H), 7.29 – 7.20 (m, 3H), 7.12 (s, 1H), 6.63 –

6.37 (m, 2H), 3.62 (s, 3H).  $^{13}C$  NMR (101 MHz,  $CDCl_3$ )  $\delta$  161.08, 147.36, 141.91, 140.53, 134.02, 128.91, 128.31, 128.02, 127.91, 126.60, 126.41, 126.39, 125.82, 122.78, 120.25, 110.91, 110.32, 51.41. HRMS (ESI) m/z.  $[M+Na]^+$  calcd for  $C_{22}H_{17}NO_3Na$ : 366.1106; found: 366.1106.

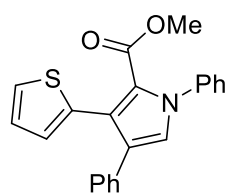

**Methyl 1,4-diphenyl-3-(thiophen-2-yl)-1H-pyrrole-2-carboxylate (4sa)** :

Colorless oil was isolated as single diastereoisomer by flash column chromatography (petroleum/ethyl acetate =10/1) in 83% yield (119.3 mg).

$^1H$  NMR (400 MHz, Chloroform-*d*)  $\delta$  7.58 – 7.39 (m, 5H), 7.36 (d,  $J$  = 5.0 Hz, 1H), 7.27 (d,  $J$  = 6.2 Hz, 5H), 7.13 (s, 1H), 7.05 (dd,  $J$  = 8.6, 3.9 Hz, 2H),

3.57 (s, 3H).  $^{13}C$  NMR (101 MHz,  $CDCl_3$ )  $\delta$  161.28, 140.70, 135.36, 133.93, 128.95, 128.55, 128.35, 128.29, 127.97, 126.74, 126.62, 126.56, 126.43, 125.98, 125.80, 123.51, 122.63, 51.25. HRMS (ESI) m/z.  $[M+Na]^+$  calcd for  $C_{22}H_{17}NO_2SNa$ : 382.0878; found: 382.0872.

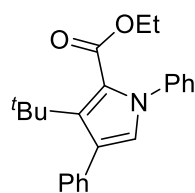

**Ethyl 3-(tert-butyl)-1,4-diphenyl-1H-pyrrole-2-carboxylate (4ta)** :

Colorless oil was isolated as single diastereoisomer by flash column chromatography (petroleum/ethyl acetate =10/1) in 85% yield (118.2 mg).

$^1H$  NMR (400 MHz, Chloroform-*d*)  $\delta$  7.45 – 7.27 (m, 10H), 6.65 (s, 1H), 4.07 (q,  $J$  = 7.1 Hz, 2H), 1.31 (s, 9H), 1.01 (t,  $J$  = 7.1 Hz, 3H).  $^{13}C$  NMR (101 MHz,  $CDCl_3$ )  $\delta$  165.02,

140.80, 138.45, 135.20, 131.01, 128.99, 127.49, 127.10, 126.60, 125.93, 124.79, 124.29, 122.52, 60.95, 33.30, 32.44, 13.59. HRMS (ESI) m/z.  $[M+Na]^+$  calcd for  $C_{23}H_{25}NO_2Na$ : 370.1783; found: 370.1780.

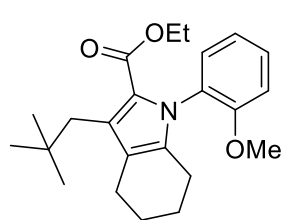

**Ethyl 1-(2-methoxyphenyl)-3-neopentyl-4,5,6,7-tetrahydro-1H-**

**indole-2-carboxylate (4uq)** :

Colorless oil was isolated as single diastereoisomer by flash column chromatography (petroleum/ethyl acetate =10/1) in 48% yield (70.6 mg). The ee was determined by HPLC

analysis on a Daicel Chiralpak AD column: hexane/*i*-PrOH 98:2, flow rate 1.0 mL/min,  $\lambda$  = 254 nm:  $\tau_1$  = 4.643 min.,  $\tau_2$  = 6.157 min.  $^1H$  NMR

(400 MHz, Chloroform-*d*)  $\delta$  7.33 (t,  $J$  = 7.8 Hz, 1H), 7.13 (d,  $J$  = 6.2 Hz, 1H), 6.98 (t,  $J$  = 7.1 Hz, 2H), 4.00 (q,  $J$  = 6.4, 5.8 Hz, 2H), 3.74 (s, 3H), 2.93 – 2.63 (m, 2H), 2.49 (s, 2H), 2.37 – 2.11 (m, 2H), 1.73 (m, 4H), 1.03 (t,  $J$  = 7.1 Hz, 3H), 0.97 (s, 9H).  $^{13}C$  NMR (101 MHz,  $CDCl_3$ )  $\delta$  161.77, 155.36, 135.35, 129.56, 129.34, 129.08, 128.70, 121.09, 120.29, 119.55, 111.86, 58.81, 55.82, 37.92, 33.80, 29.95, 23.73, 23.02, 22.83, 22.61, 13.96. HRMS (ESI) m/z.  $[M+Na]^+$  calcd for  $C_{23}H_{31}NO_3Na$ : 392.2202; found: 392.2200.

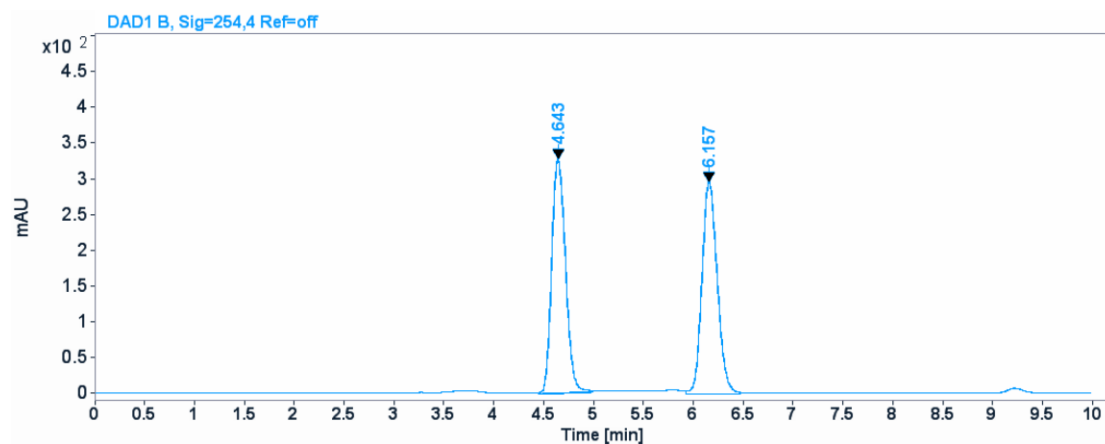

Signal: DAD1 B, Sig=254,4 Ref=off

| RT [min] | Width [min] | Area [mAU*S] | Height [mAU] | Area%   |
|----------|-------------|--------------|--------------|---------|
| 4.643    | 0.160       | 3137.652     | 327.114      | 49.9943 |
| 6.157    | 0.177       | 3138.364     | 295.697      | 50.0057 |
|          | Sum         | 6276.0159    |              |         |

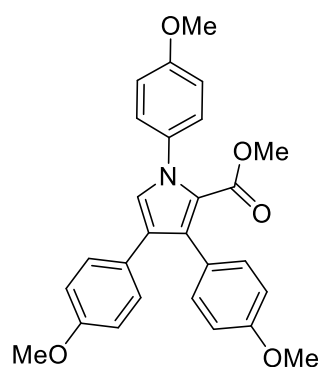

**Methyl 1,3,4-tris(4-methoxyphenyl)-1H-pyrrole-2-carboxylate (4vp)** : Colorless oil was isolated as single diastereoisomer by flash column chromatography (petroleum/ethyl acetate =4/1) in 46% yield (81.9 mg). <sup>1</sup>H NMR (400 MHz, Chloroform-*d*) δ 7.31 (d, *J* = 8.8 Hz, 2H), 7.21 (d, *J* = 8.5 Hz, 2H), 7.04 (d, *J* = 8.6 Hz, 2H), 7.00 (s, 1H), 6.96 (d, *J* = 8.7 Hz, 2H), 6.86 (d, *J* = 8.5 Hz, 2H), 6.75 (d, *J* = 8.5 Hz, 2H), 3.86 (s, 3H), 3.83 (s, 3H), 3.76 (s, 3H), 3.47 (s, 3H). <sup>13</sup>C NMR (101 MHz, CDCl<sub>3</sub>) δ 161.69, 158.94, 158.45, 158.03, 134.06, 131.83, 131.01, 129.36, 127.30, 127.05, 126.82, 126.52, 124.98, 121.32, 113.87, 113.67, 113.05, 55.50, 55.16, 55.14, 50.89. HRMS (ESI) *m/z*. [M+Na]<sup>+</sup> calcd for C<sub>27</sub>H<sub>25</sub>NO<sub>5</sub>Na: 466.1630; found: 466.1623.



## 5. Typical procedures for the synthesis of **5a**

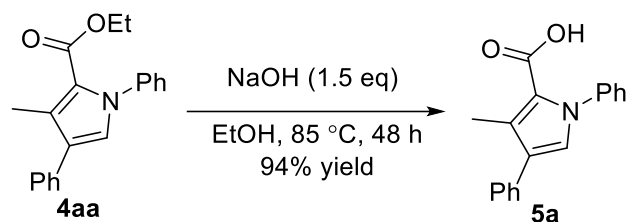

A solution of pyrrole **4aa** (153 mg, 0.5 mmol) in EtOH (5 mL) was added sodium hydroxide in ethanol (0.5 mmol/mL, 1.5 mL) at 85 °C for 48 h. When TLC monitoring on silica gel indicated complete consumption of pyrrole **4aa**, the mixture was cooled to room temperature and evaporated all the volatiles under reduced pressure. The residue was extracted with dichloromethane and water, and adjusted the water phase to acidic. The organic phase was collected, dried over anhydrous sodium sulfate, filtered, and evaporated under reduced pressure. The residue was purified by silica gel column chromatography (eluent: petroleum/ethyl acetate = 2:1, v/v), affording **5aa** (130.0 mg, 94% yield) as a white solid.

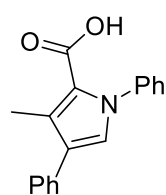

**3-methyl-1,4-diphenyl-1H-pyrrole-2-carboxylic acid (5a)** : white solid. was isolated as single diastereoisomer by flash column chromatography (petroleum/ethyl acetate =2/1) in 94% yield (130.0 mg). <sup>1</sup>H NMR (400 MHz, Chloroform-*d*) δ 7.47 – 7.36 (m, 7H), 7.36 – 7.27 (m, 3H), 7.00 (s, 1H), 2.49 (s, 3H). <sup>13</sup>C NMR (101 MHz, CDCl<sub>3</sub>) δ 166.03, 140.97, 134.50, 130.56, 130.11, 128.68, 128.50, 128.40, 127.54, 126.78, 126.54, 125.97, 120.48, 12.40. HRMS (ESI) m/z. [M+Na]<sup>+</sup> calcd for C<sub>18</sub>H<sub>15</sub>NO<sub>2</sub>Na: 300.1000; found: 300.0989.

## 6. Typical procedures for the synthesis of **5b**

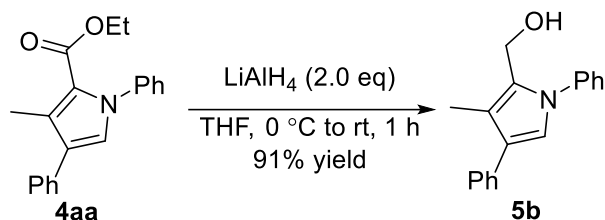

Lithium aluminium hydride (38 mg, 1 mmol) was stirred in dry THF at 0 °C. Then pyrrole **4aa** (153 mg, 0.5 mmol) was dissolved in THF and added drop wise to the solution of lithium aluminium hydride at 0 °C. Then, the mixture was slowly warmed to room temperature till the completion (1 h) of reaction as monitored by TLC. It was then cooled to 0 °C, and 10 mL of water was added successively. Then reaction mixture was allowed to stir for 0.5 h, filtered through celite and washed with ethyl acetate, dried over anhydrous sodium sulfate, concentrated and purified by silica gel column chromatography (eluent: petroleum/ethyl acetate = 4:1, v/v), affording **5b** (120.0 mg, 91% yield) as a white solid.

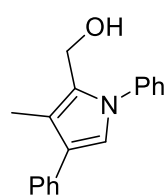

**(3-methyl-1,4-diphenyl-1H-pyrrol-2-yl)methanol (5b)** : white solid. was isolated as single diastereoisomer by flash column chromatography (petroleum/ethyl acetate =4/1) in 91% yield (120.0 mg). <sup>1</sup>H NMR (400 MHz, Chloroform-*d*) δ 7.57 – 7.43 (m, 6H), 7.43 – 7.34 (m, 3H), 7.28 (m, 1H), 6.99 (s, 1H), 4.59 (s, 2H), 2.33 (s, 3H), 1.58 (s, 1H). <sup>13</sup>C NMR (101 MHz, CDCl<sub>3</sub>) δ 139.79, 135.90, 129.61, 129.34, 128.47, 128.00, 127.15, 125.87, 125.49, 125.39, 120.34, 117.93, 54.15, 10.49. HRMS (ESI) m/z. [M+Na]<sup>+</sup> calcd for C<sub>18</sub>H<sub>17</sub>NONa: 286.1208; found: 286.1201.

## 7. Typical procedures for the synthesis of Lamellarin R

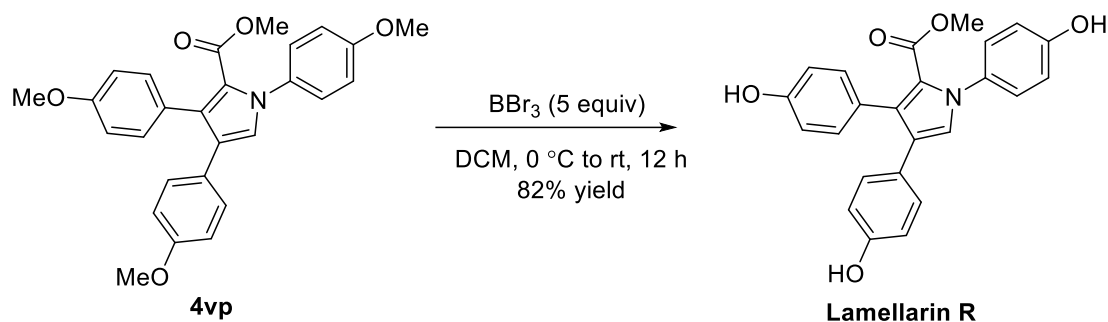

To a magnetically stirred solution of **4vp** (88 mg, 0.2 mmol) in DCM (4 mL) was added  $\text{BBr}_3$  (1 mL, 1 M in DCM, 1 mmol) at  $0\text{ }^\circ\text{C}$ , and the resulting mixture was stirred at rt for 12 hours. The reaction was quenched with the addition of MeOH (2 mL), and the solvent were removed under vacuum. The residue was dissolved in water (10 mL) and extracted with EtOAc (10 mL  $\times$  4). The combined organic phase was dried ( $\text{Na}_2\text{SO}_4$ ) and evaporated, purified by silica gel column chromatography (eluent: petroleum/ethyl acetate = 1:1, v/v), affording **Lamellarin R** (65.7 mg, 82% yield) as colorless oil.

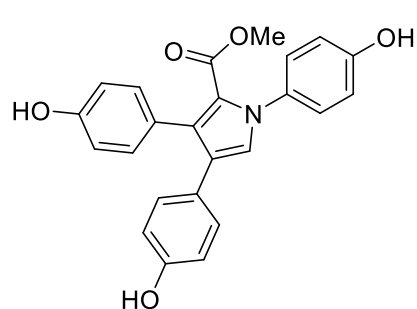

**Methyl 1,3,4-tris(4-hydroxyphenyl)-1H-pyrrole-2-carboxylate (Lamellarin R)**: colorless oil. was isolated as single diastereoisomer by flash column chromatography (petroleum/ethyl acetate =1/1) in 82% yield (65.7 mg).  $^1\text{H}$  NMR (400 MHz, Acetone- $d_6$ )  $\delta$  8.64 (s, 1H), 8.30 (s, 1H), 8.21 (s, 1H), 7.23 (d,  $J$  = 8.7 Hz, 2H), 7.11 (s, 1H), 7.07 (d,  $J$  = 8.5 Hz, 2H), 6.99 (d,  $J$  = 8.6 Hz, 2H), 6.92 (d,  $J$  = 8.7 Hz, 2H), 6.78 (d,  $J$  = 8.5 Hz, 2H), 6.67 (d,  $J$  = 8.6 Hz, 2H), 3.40 (s, 3H).  $^{13}\text{C}$

NMR (101 MHz, Acetone)  $\delta$  161.25, 156.73, 156.24, 155.81, 133.14, 131.80, 130.35, 129.33, 126.64, 126.25, 125.92, 125.75, 124.91, 121.50, 115.20, 114.93, 114.38, 50.00. HRMS (ESI)  $m/z$ .  $[\text{M}+\text{Na}]^+$  calcd for  $\text{C}_{24}\text{H}_{19}\text{NO}_5\text{Na}$ : 424.1161; found: 424.1153.

## 8. Proposed mechanism for the reaction

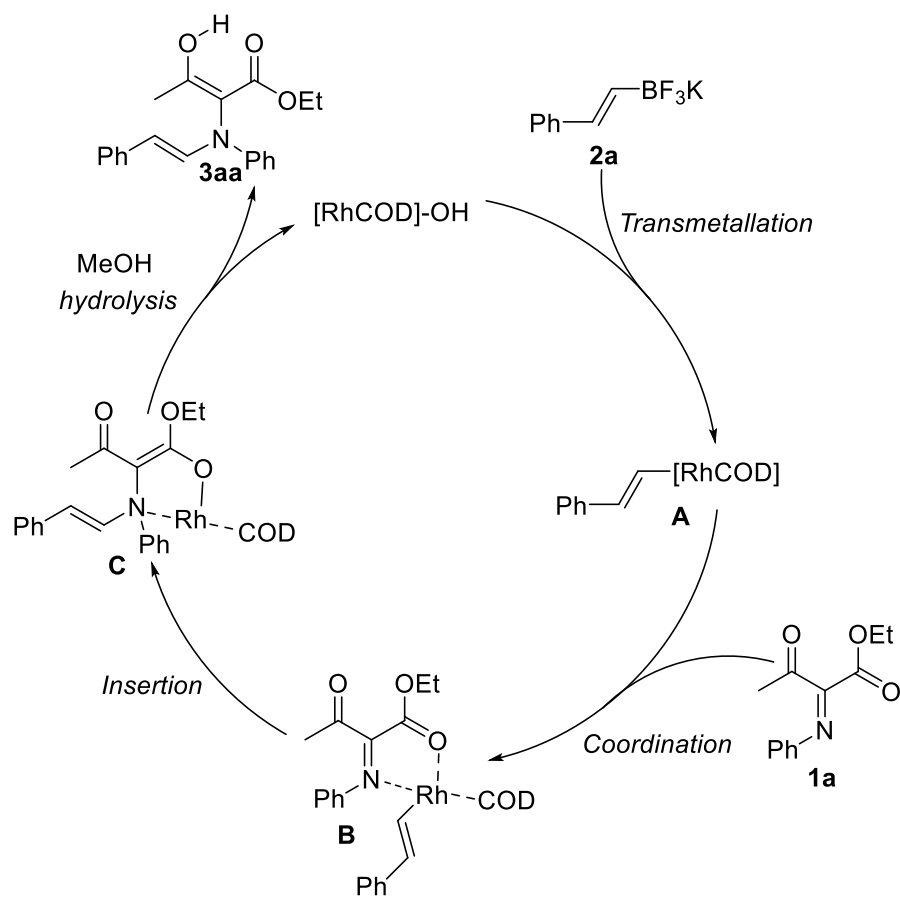

## 9. NMR spectra

1a

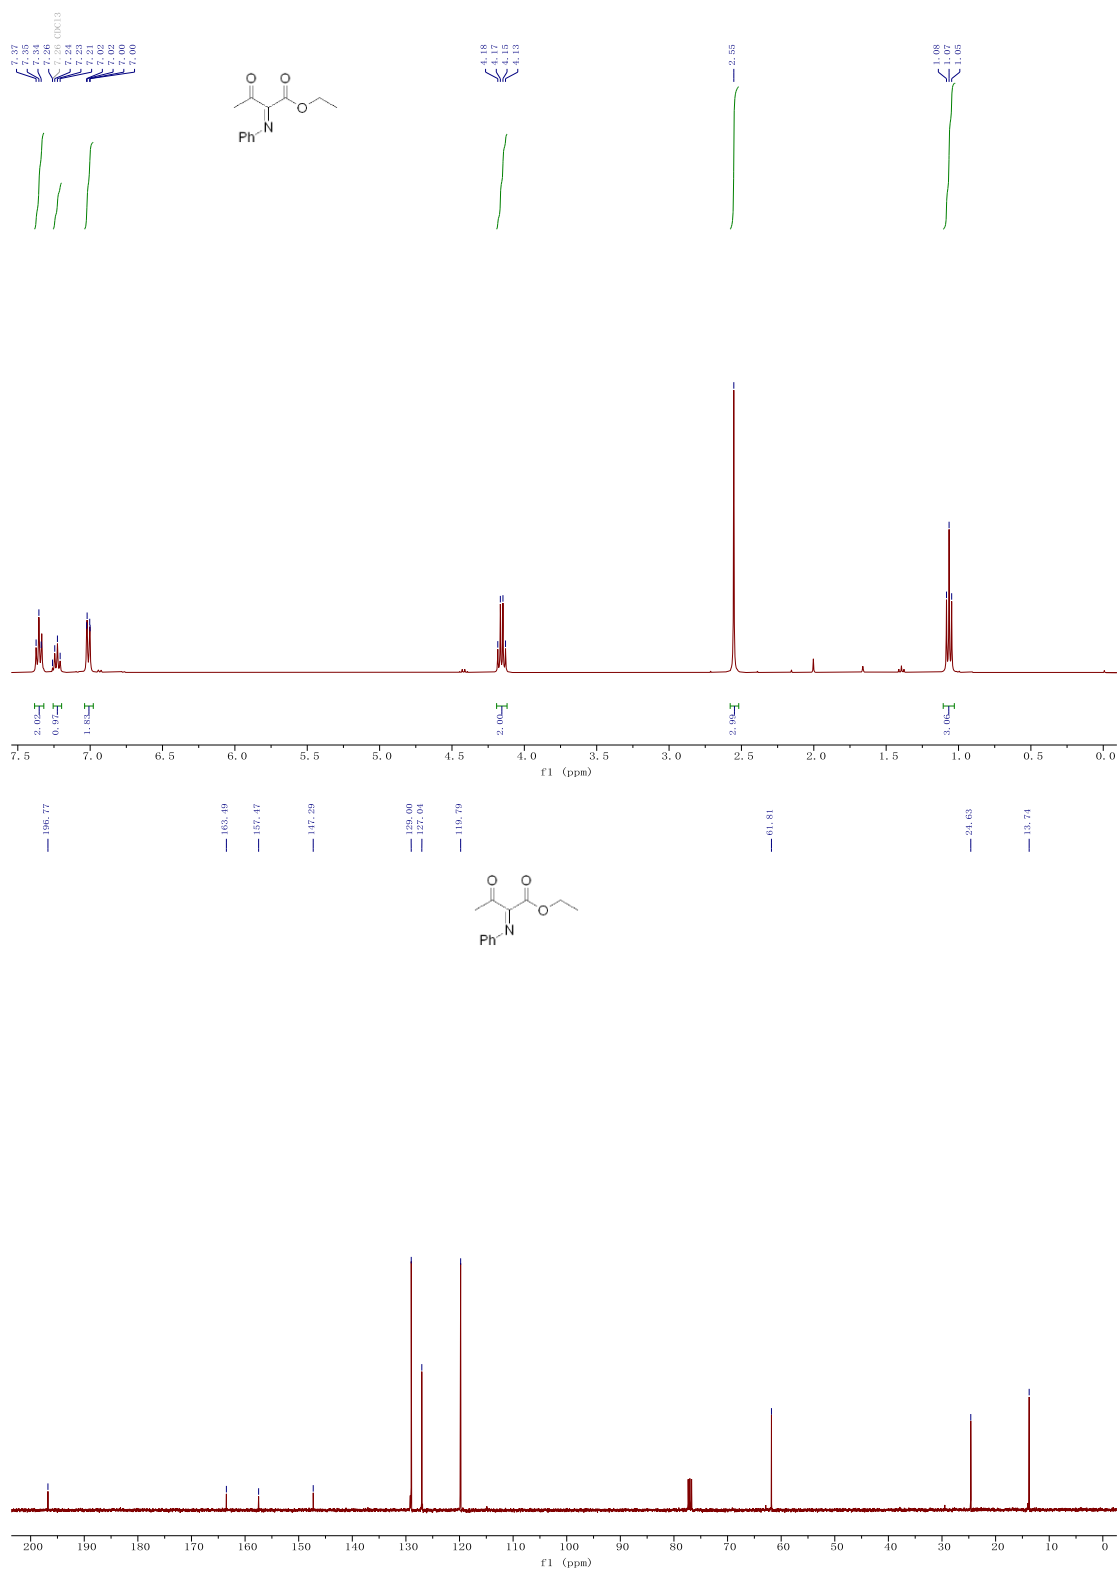

1b

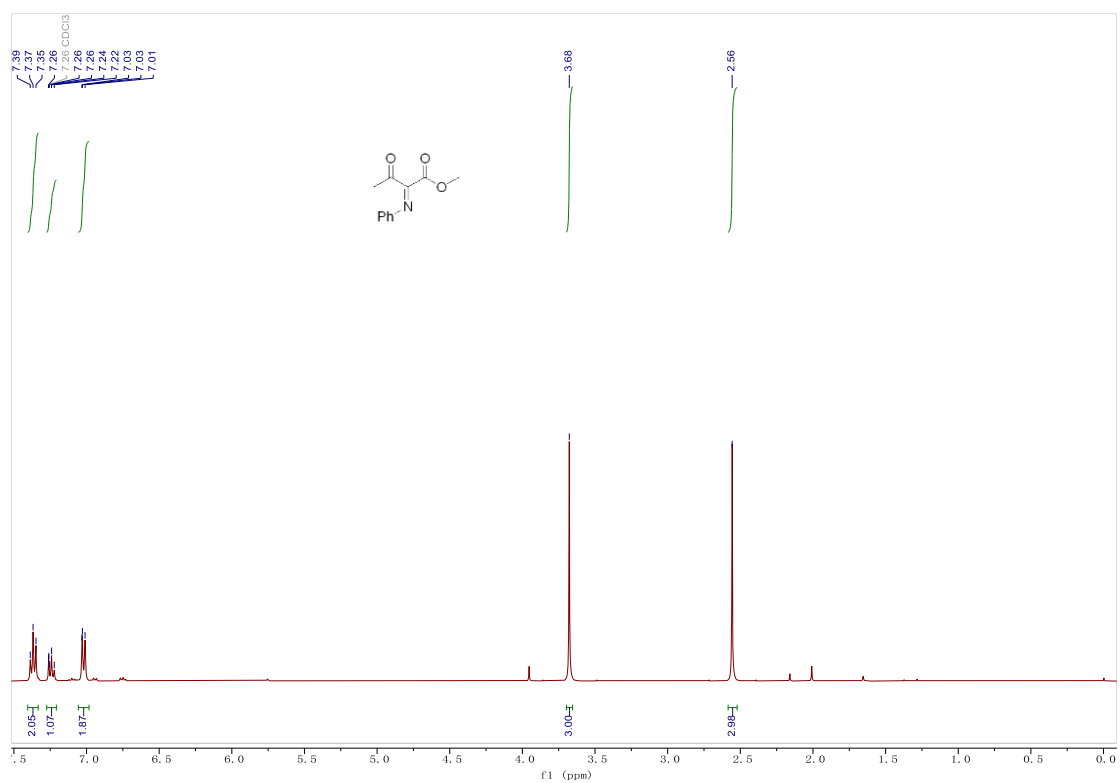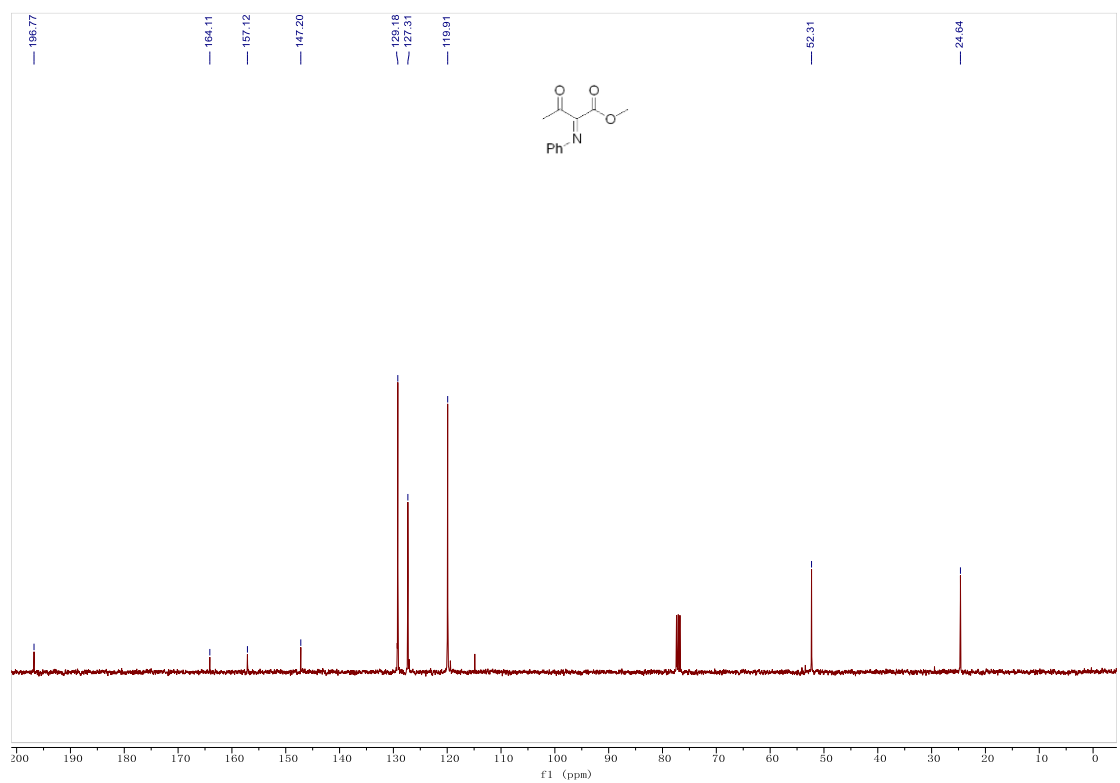

1c

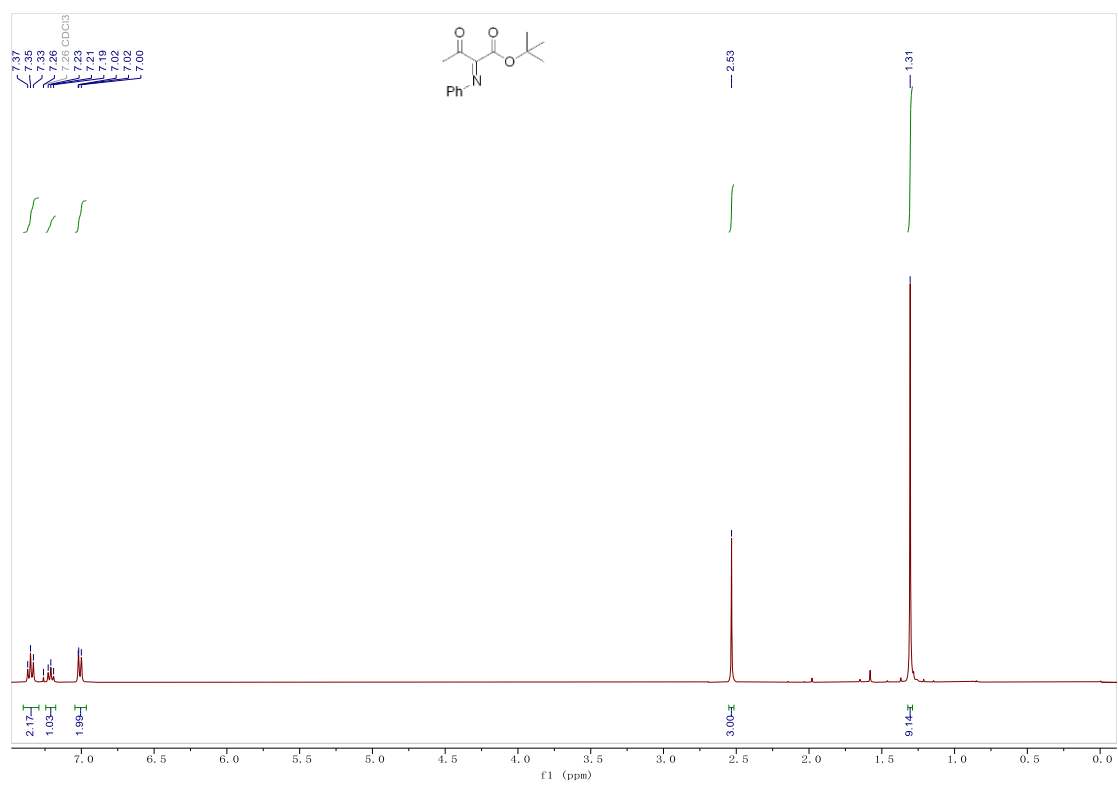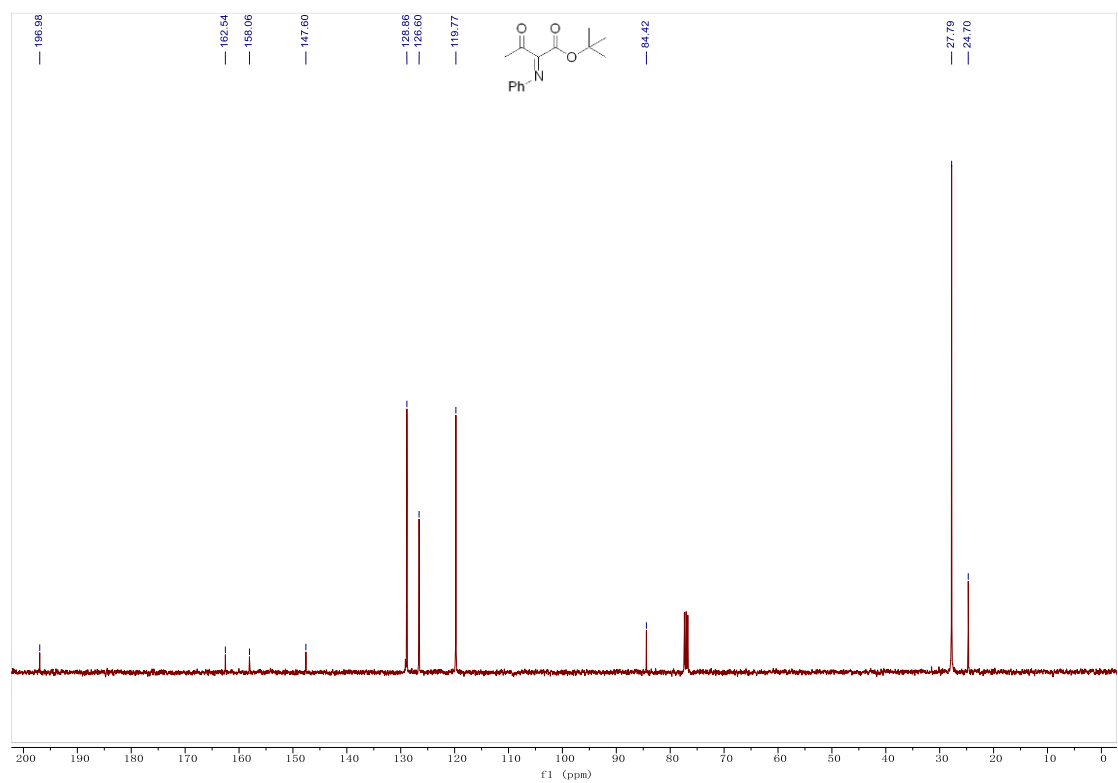

1d

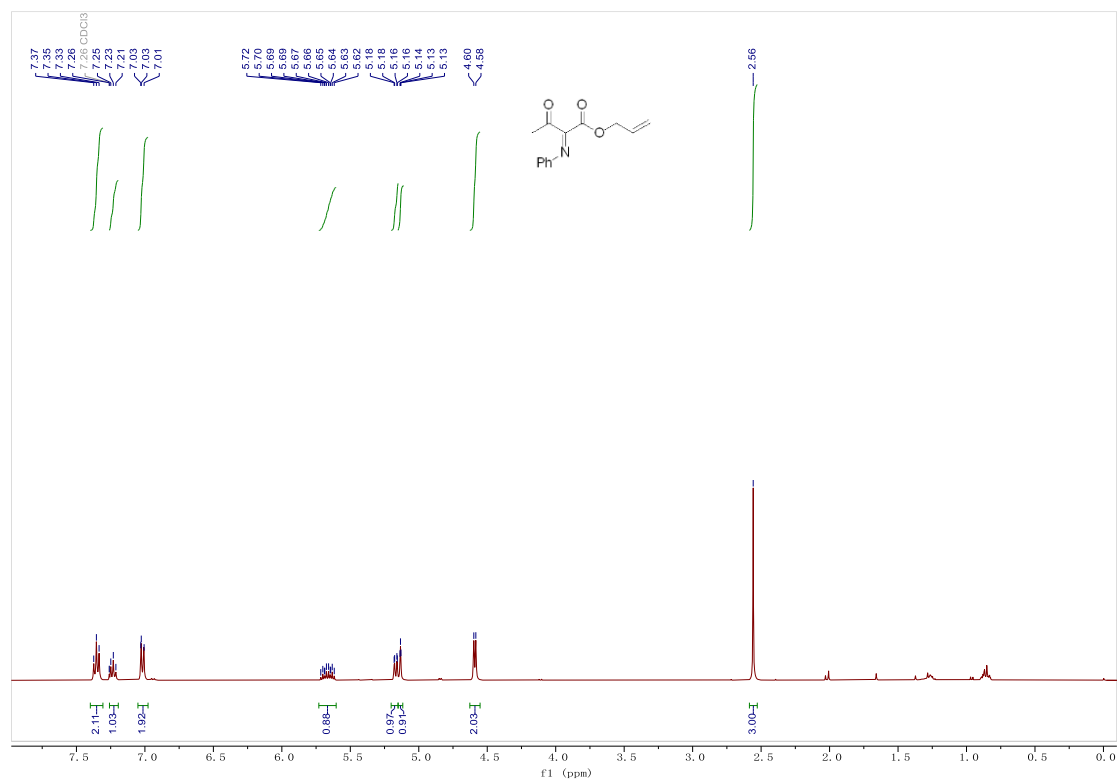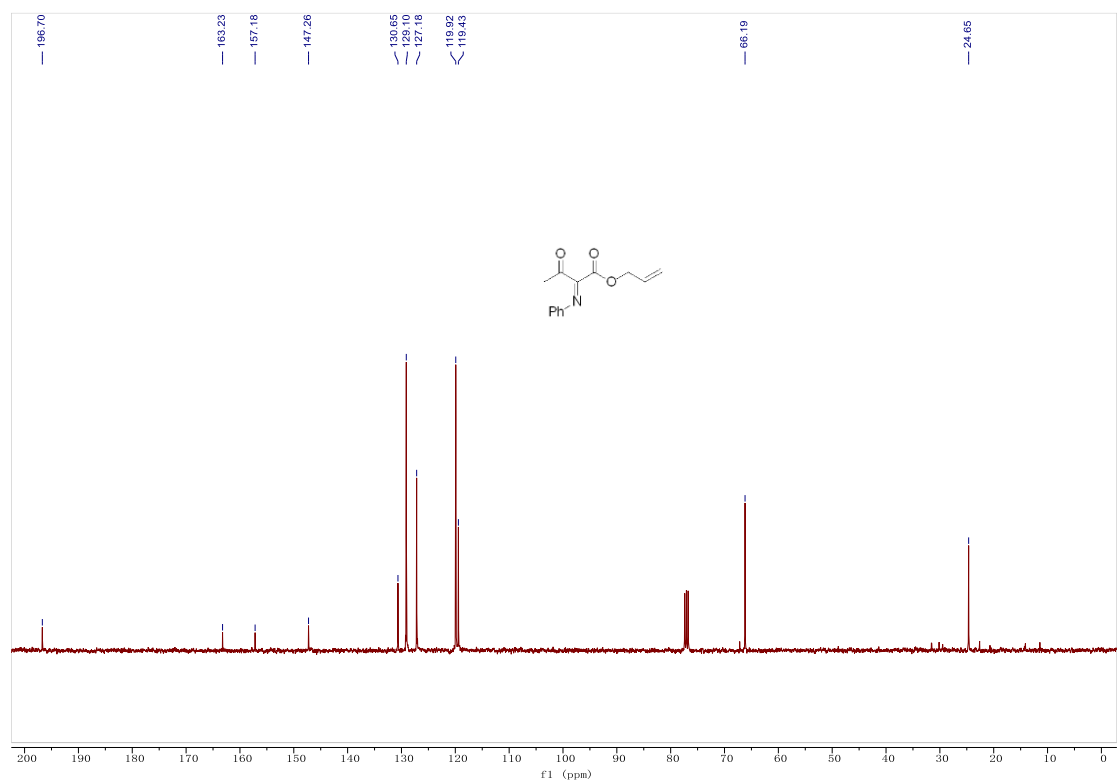



1e

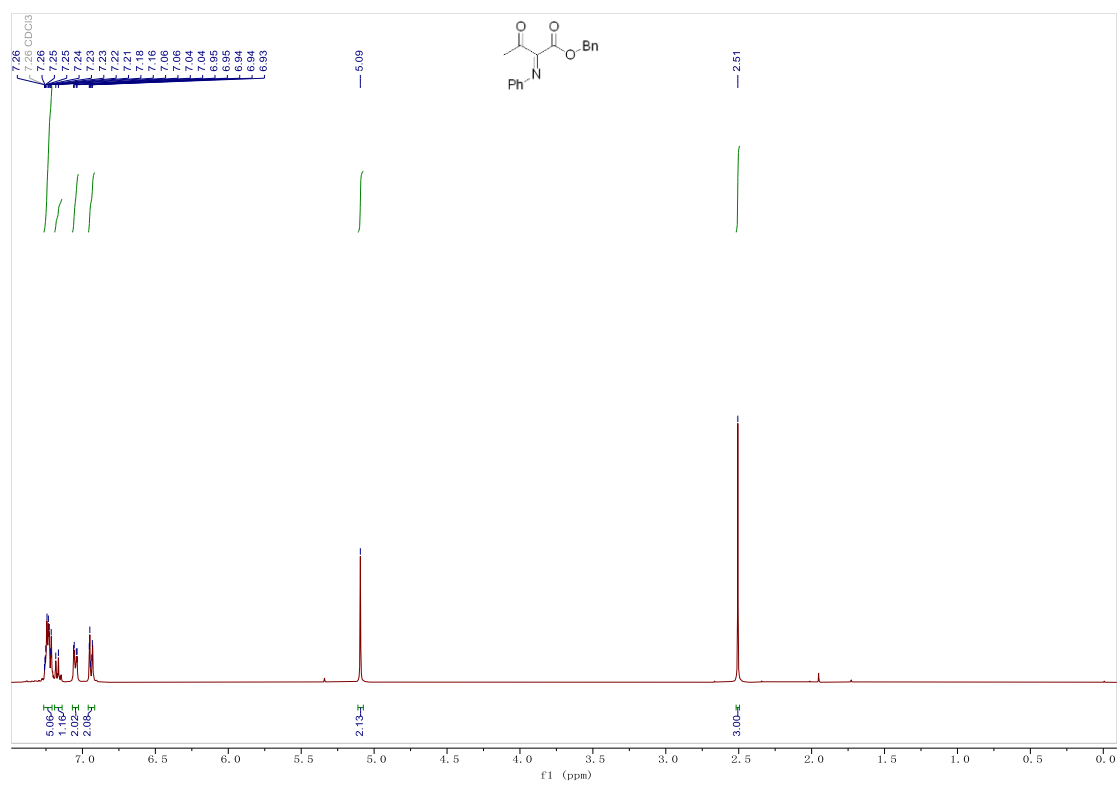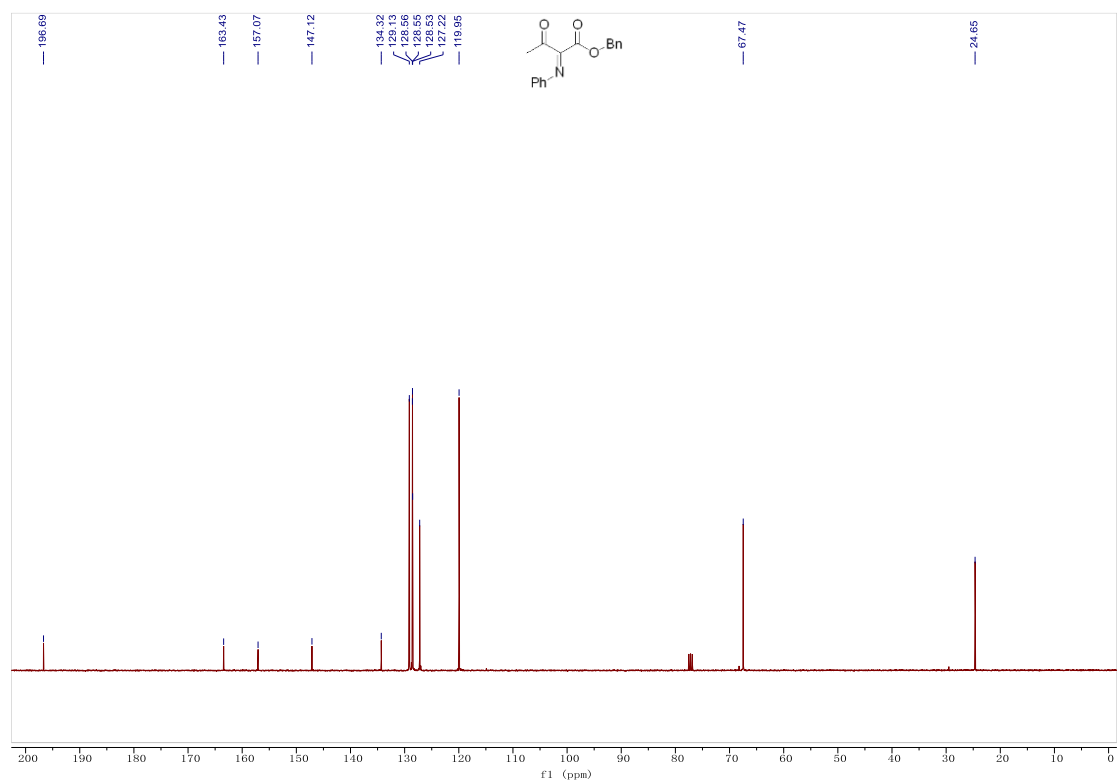

1f

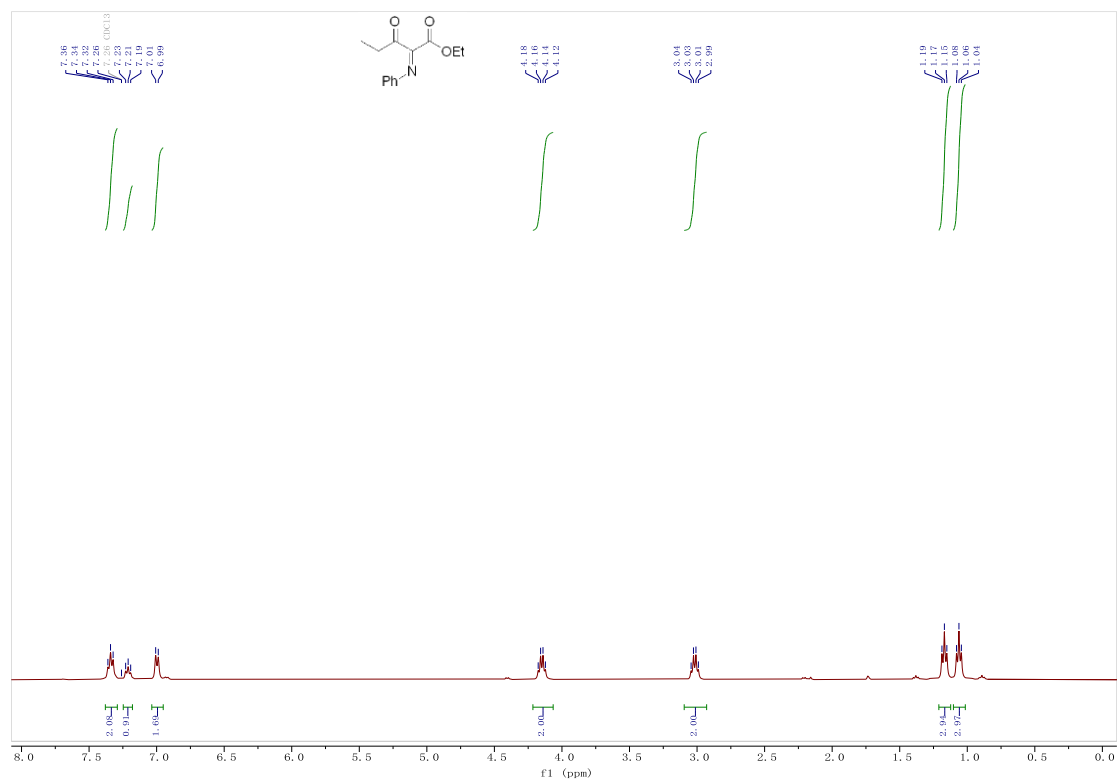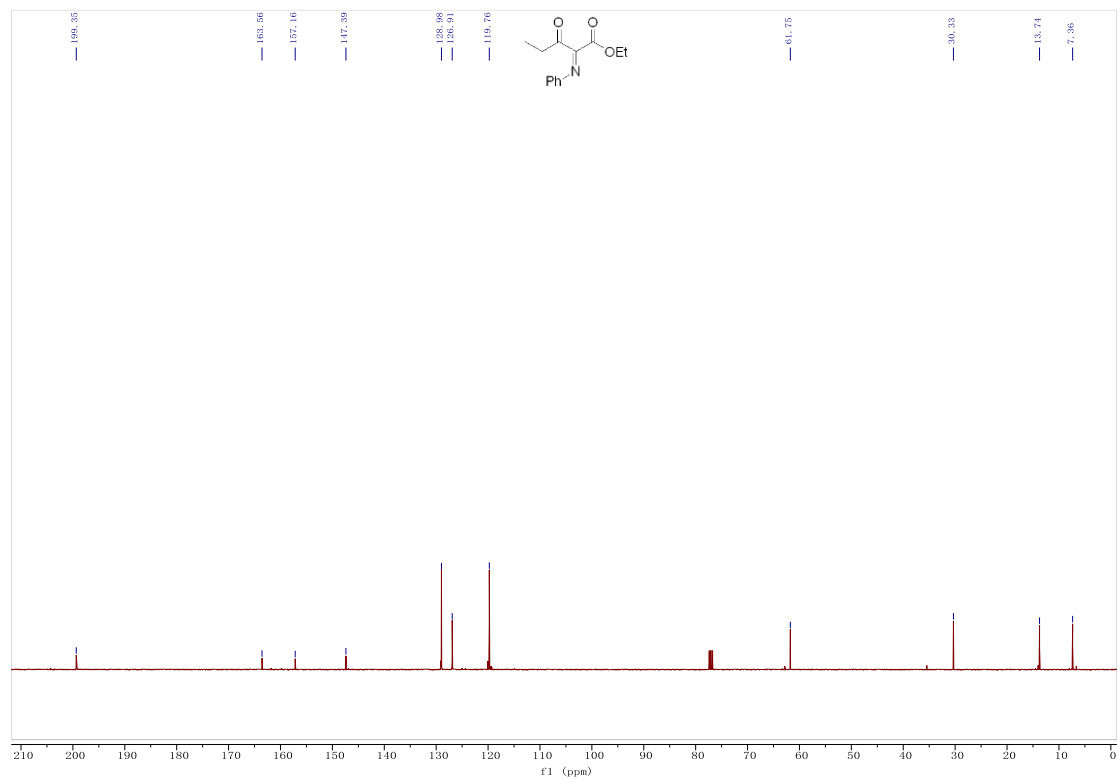

1g

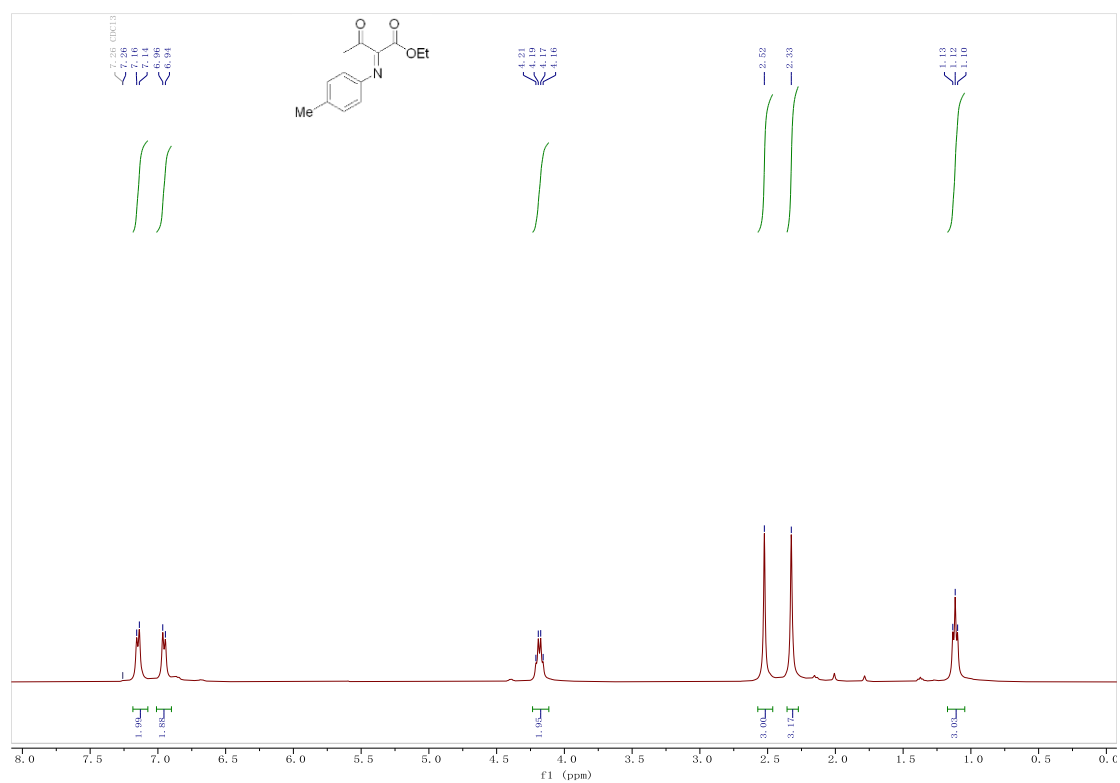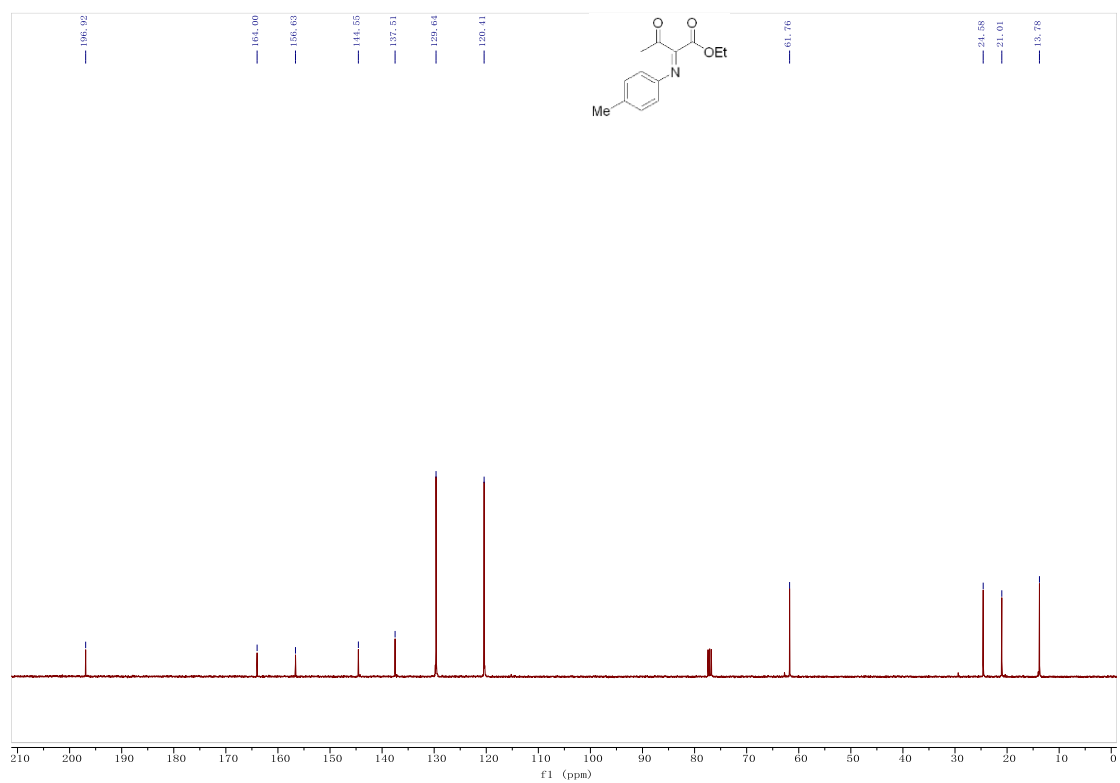

1h

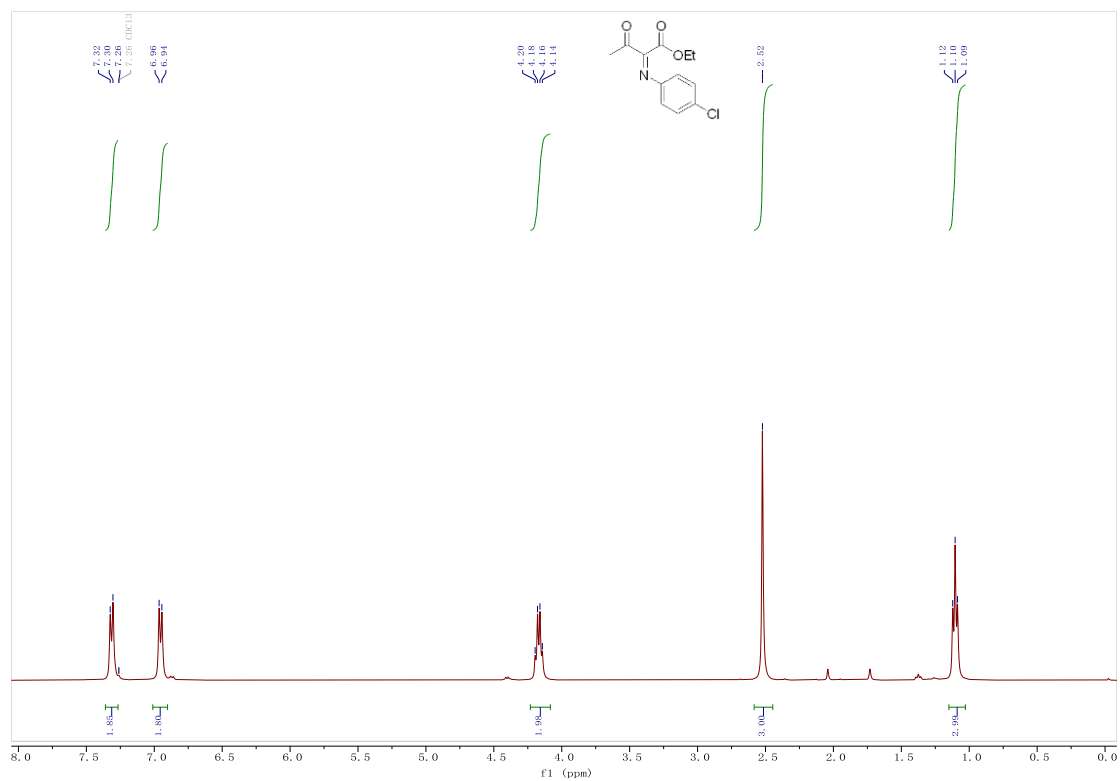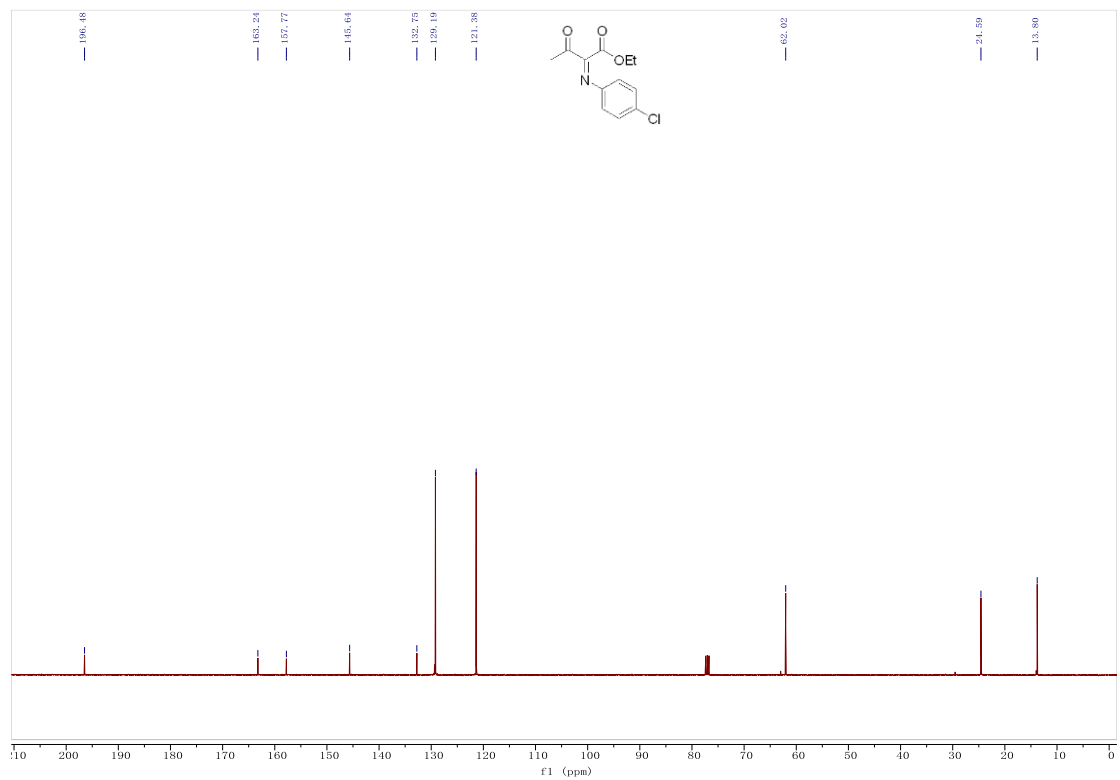

1i

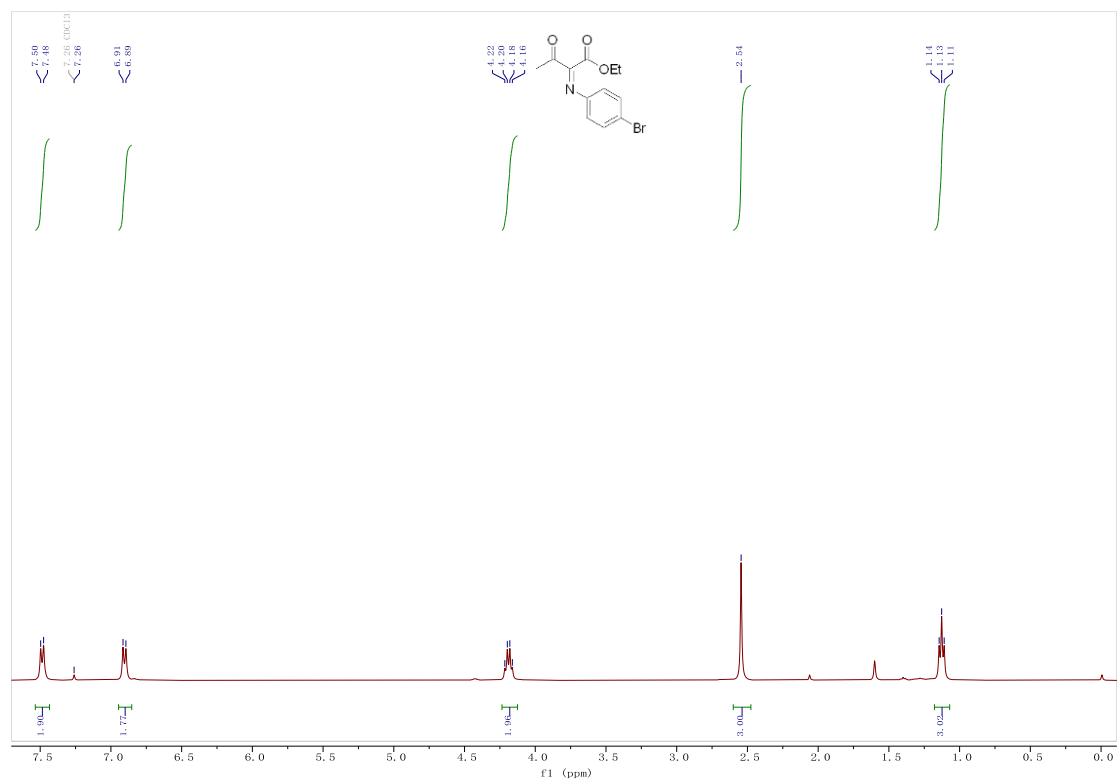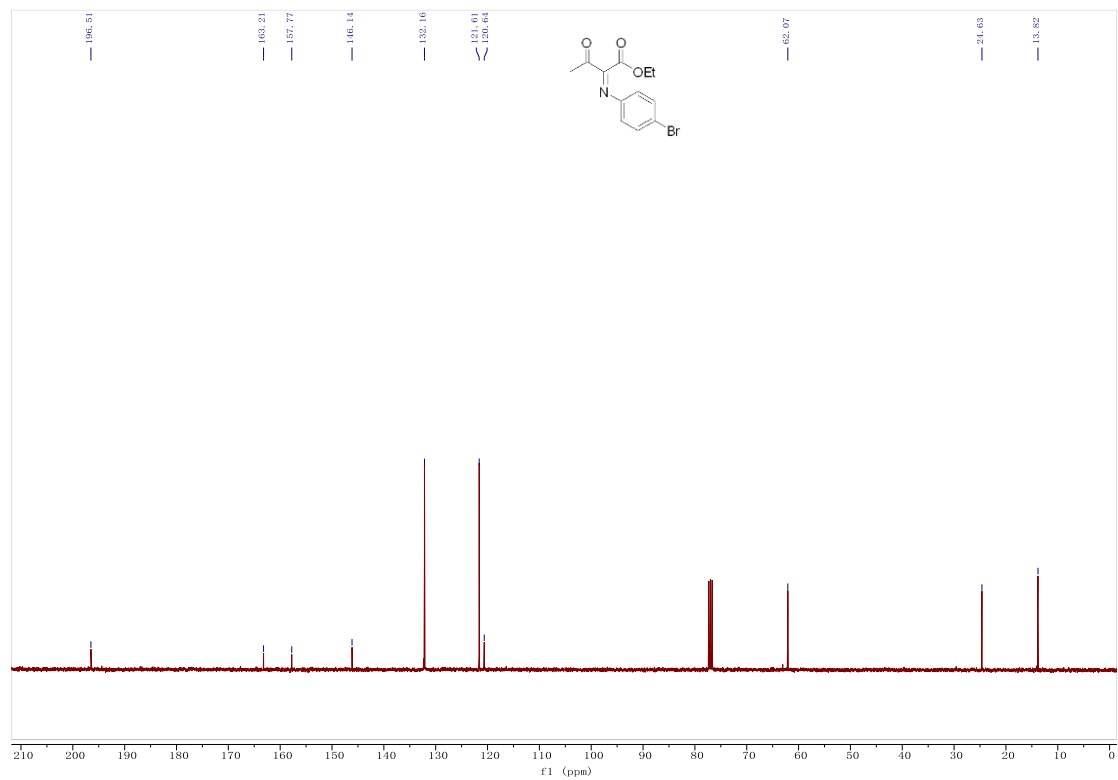

1j

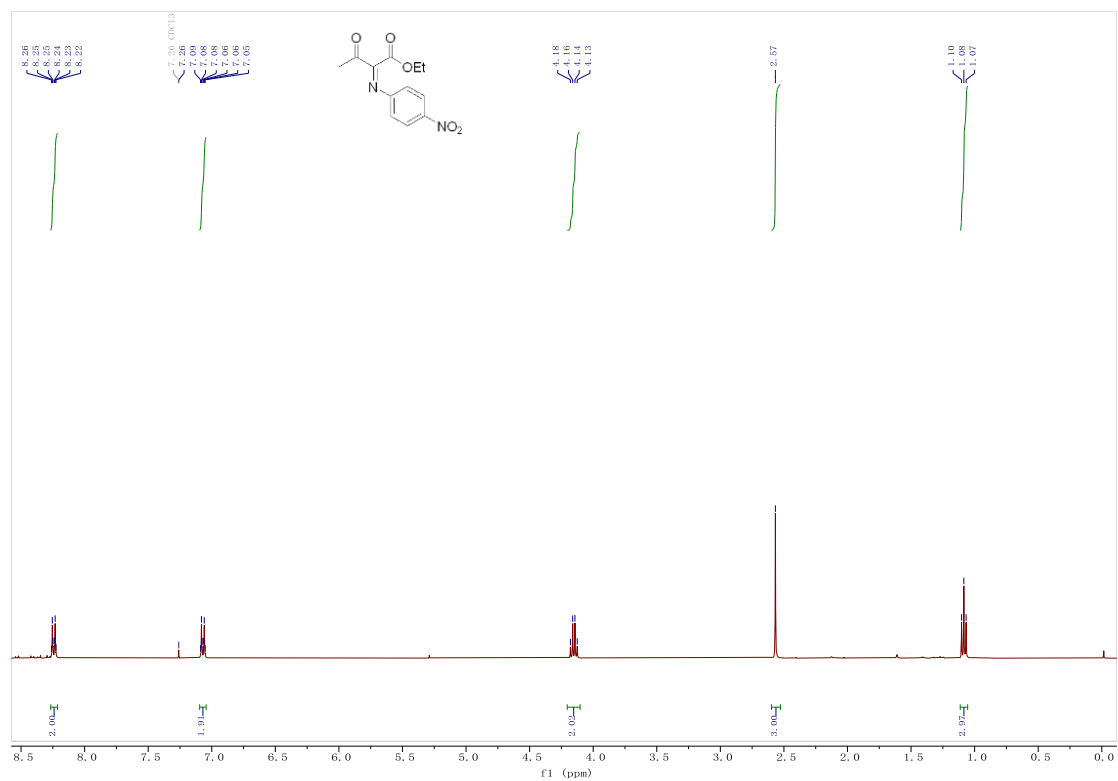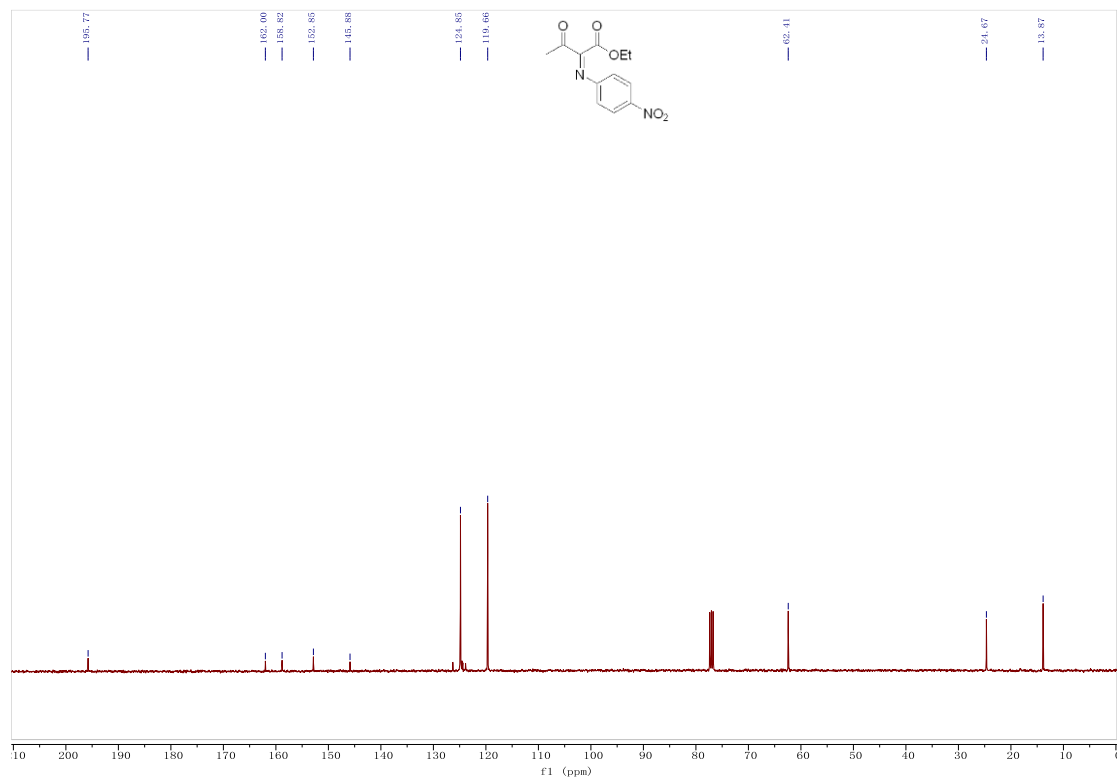

1k

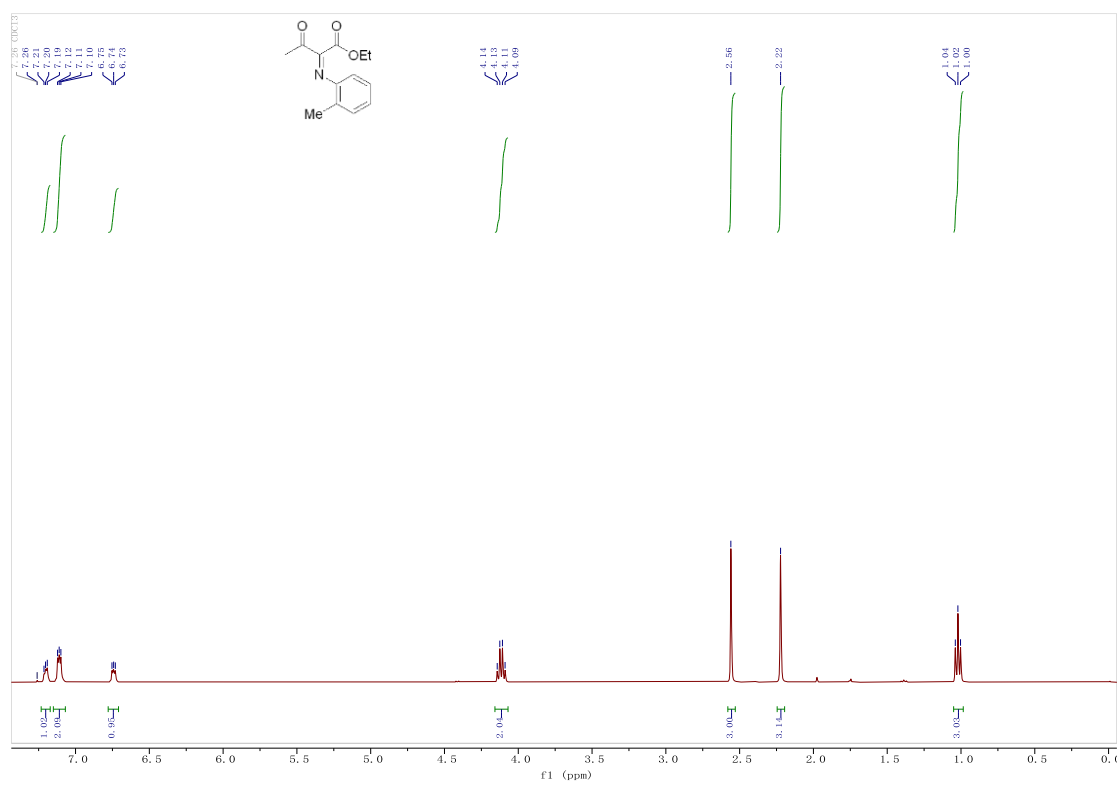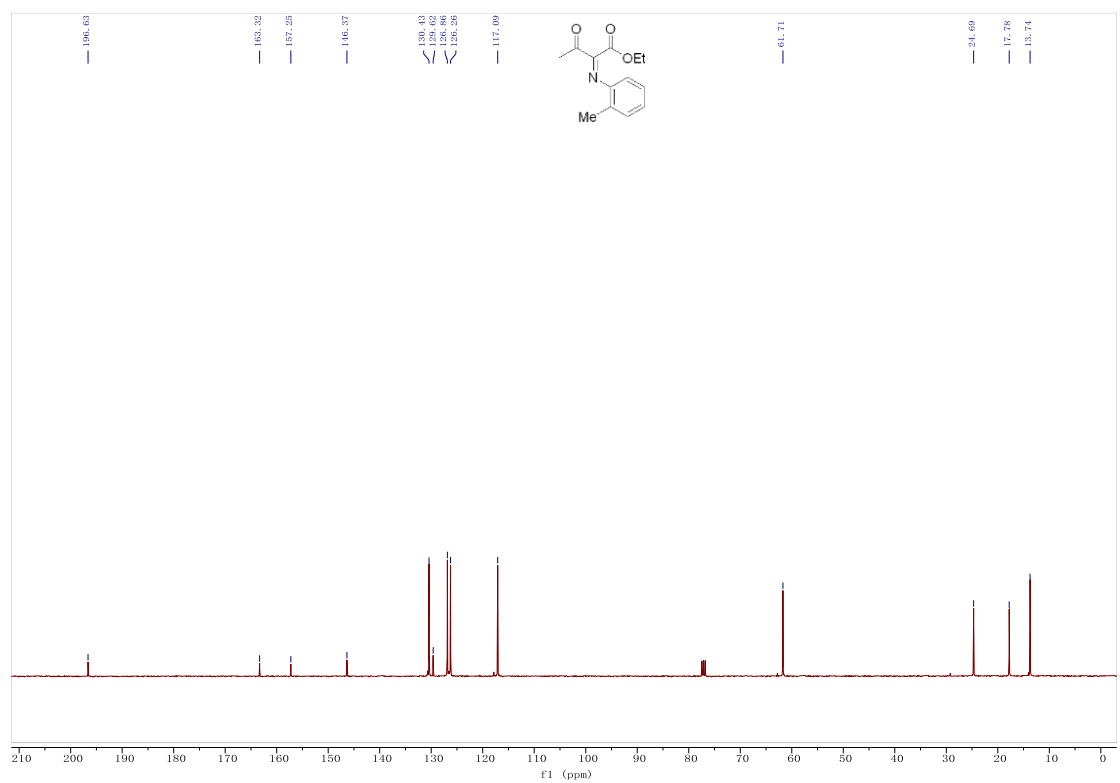

11

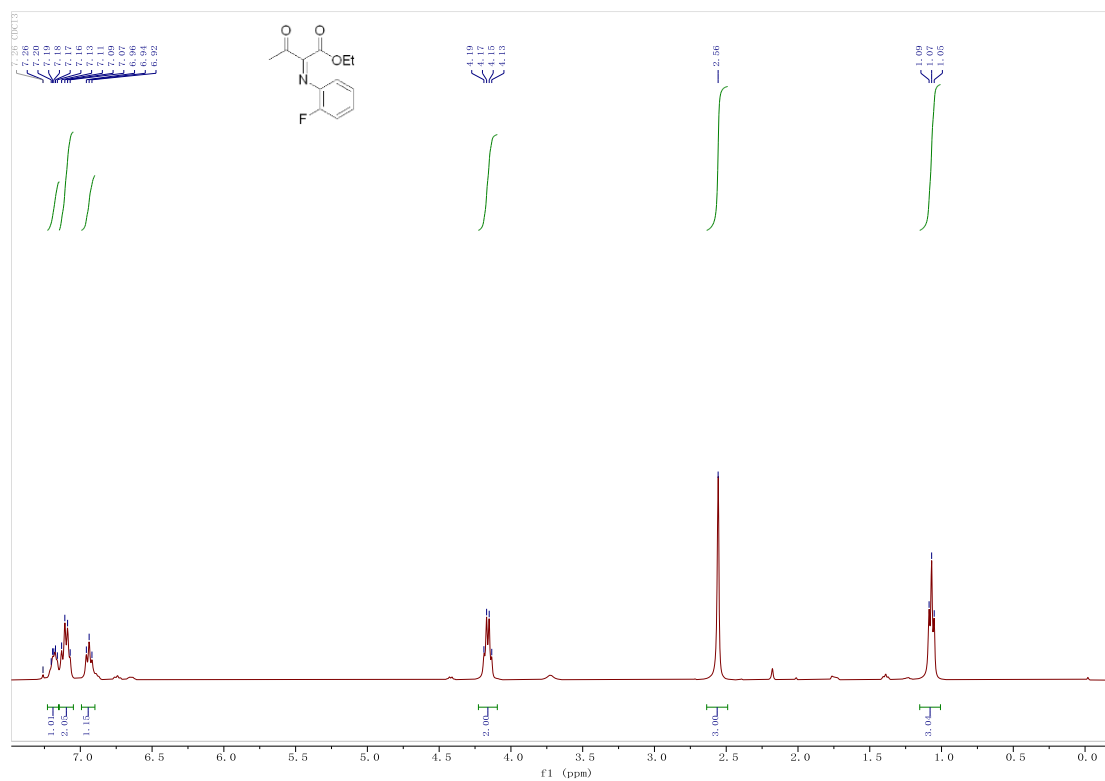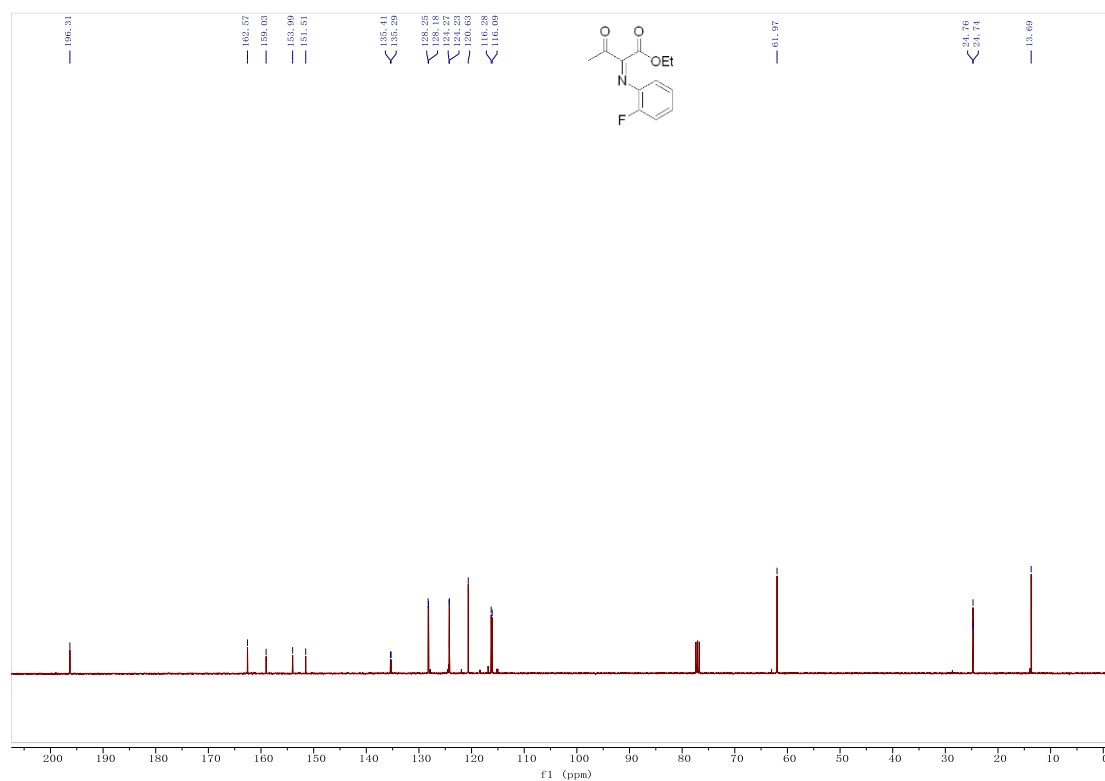



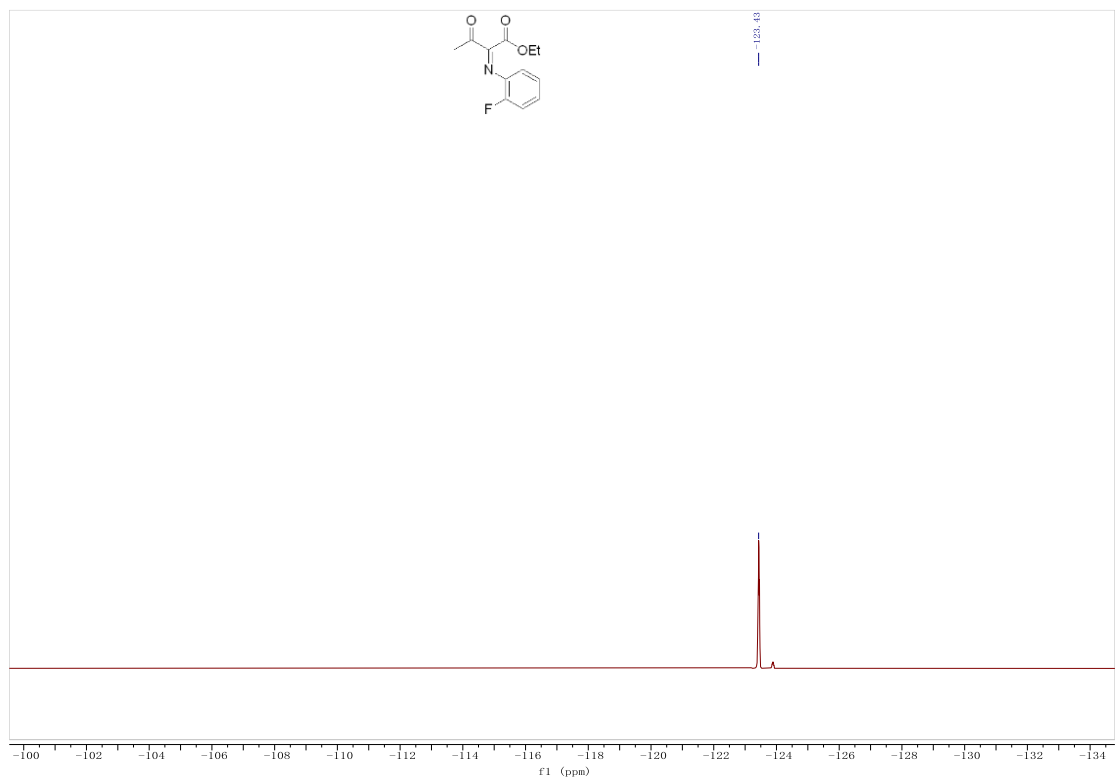

1m

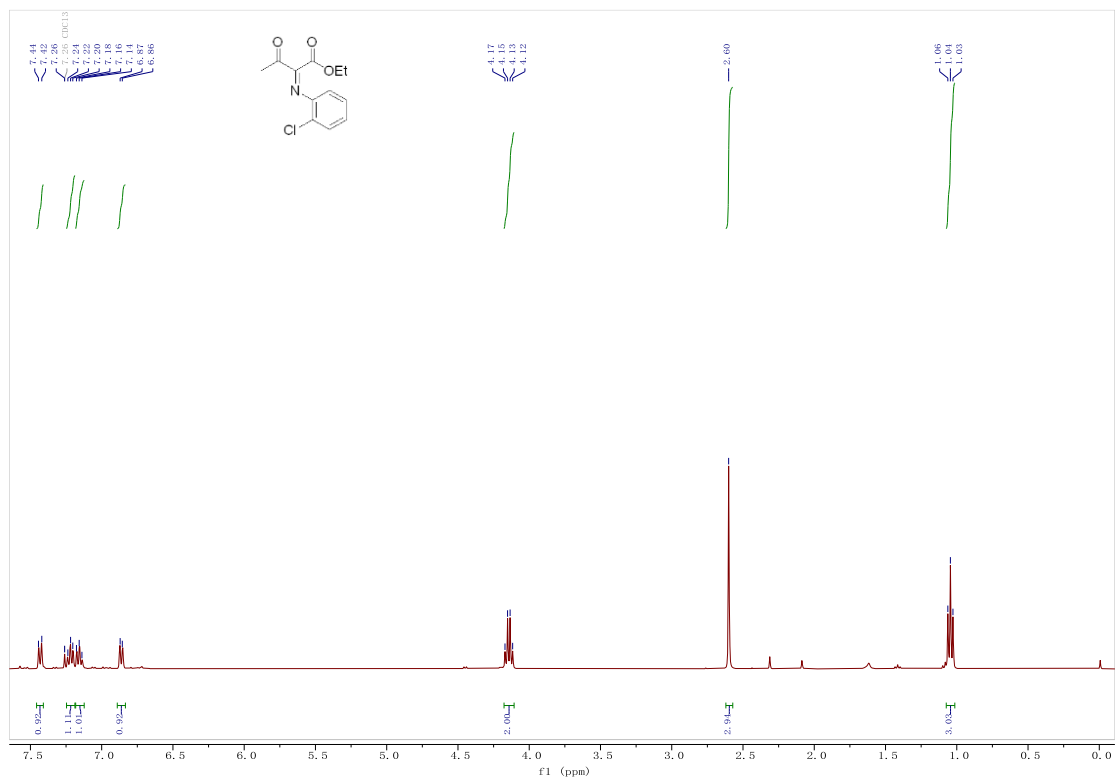

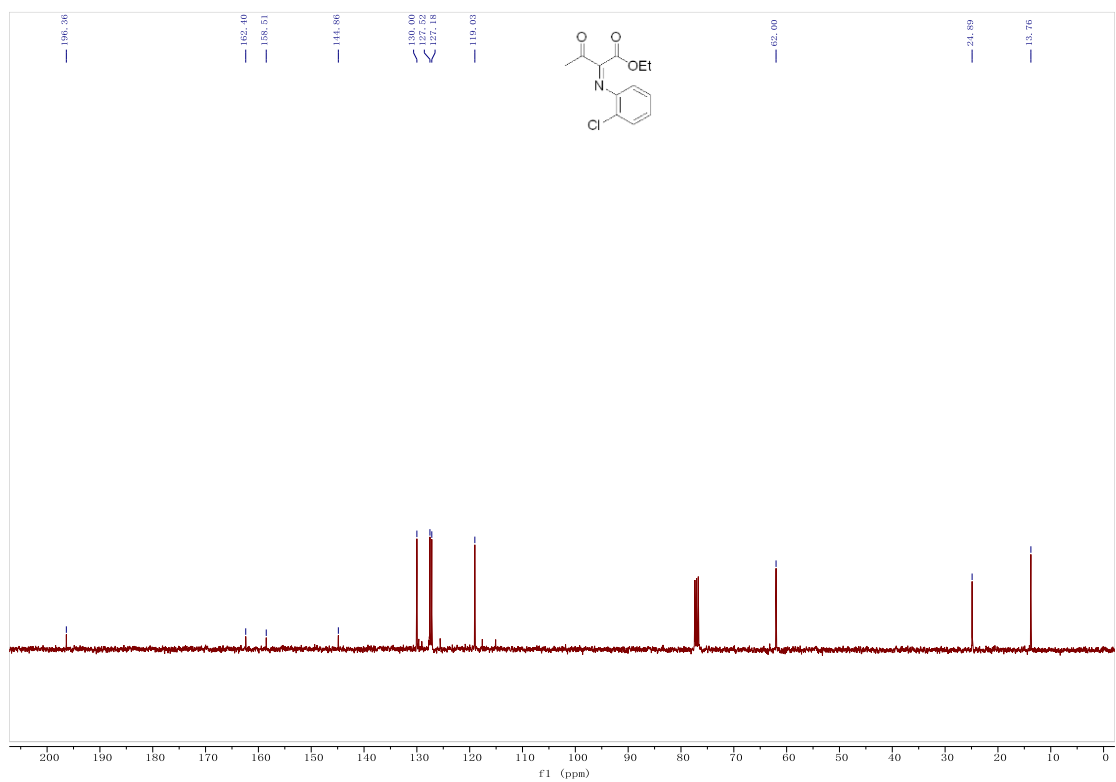

**1n**

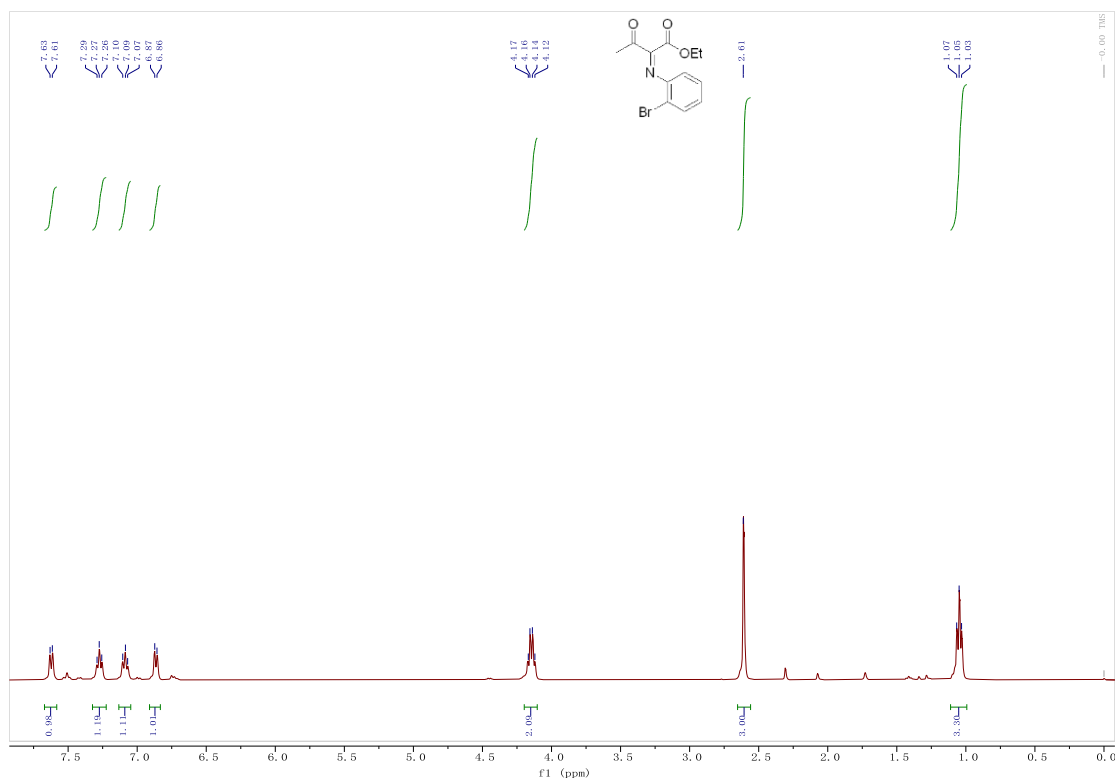

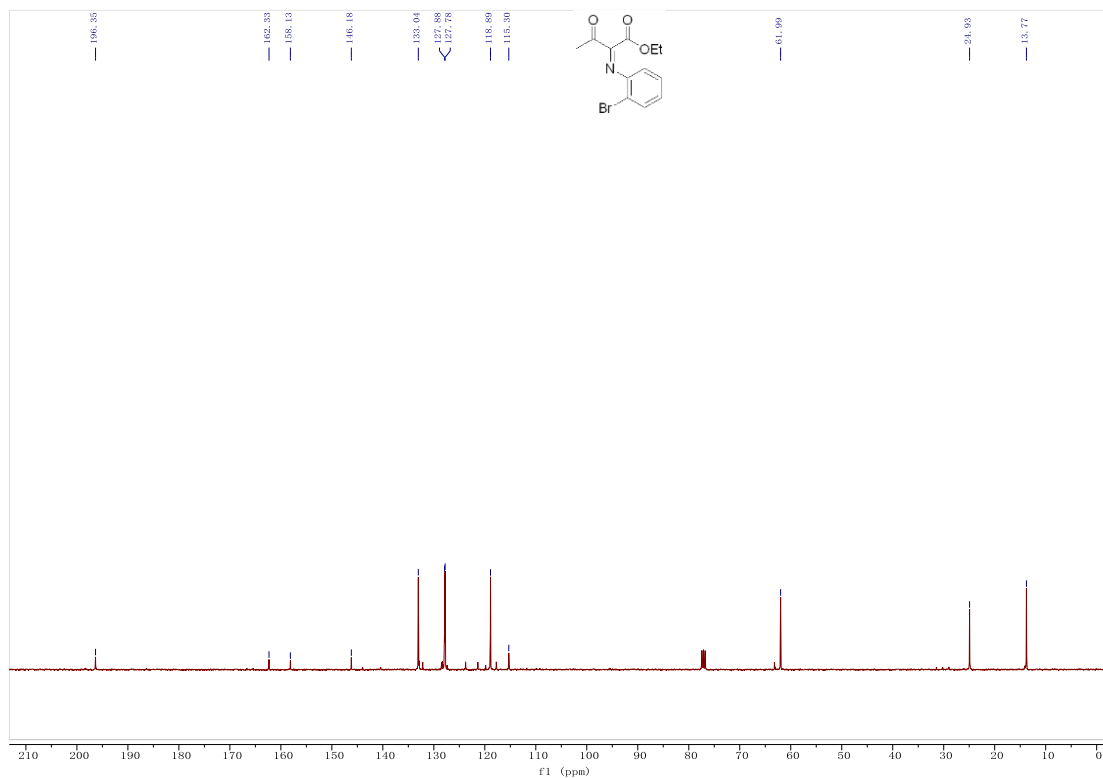

10

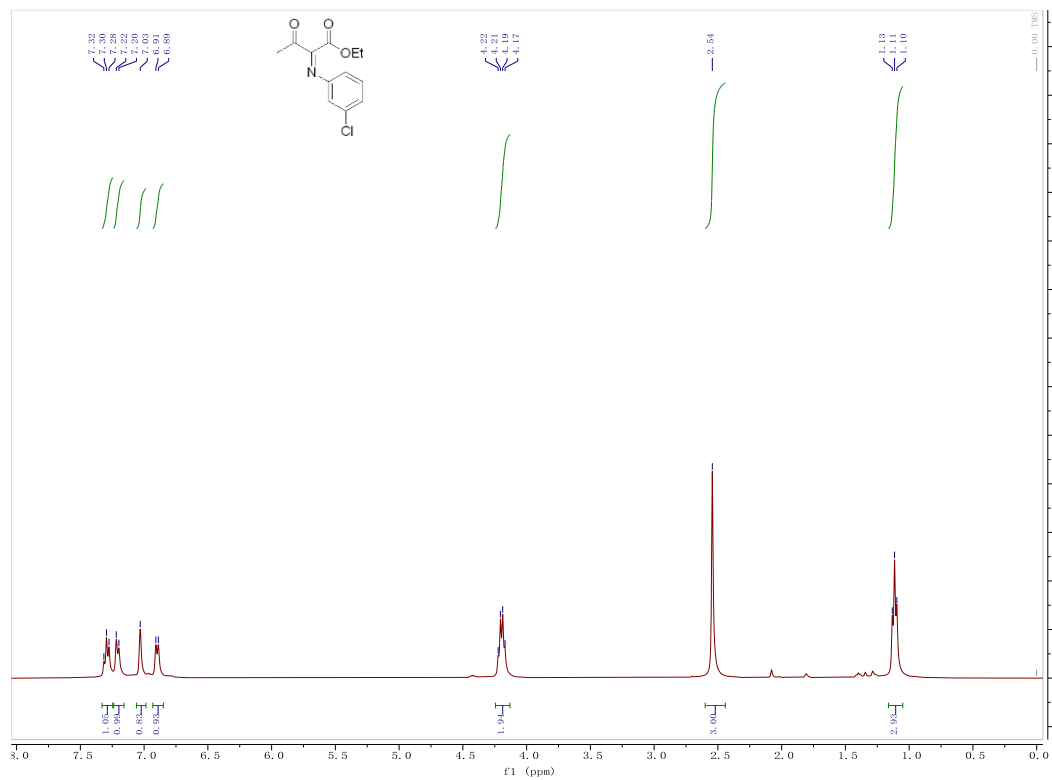

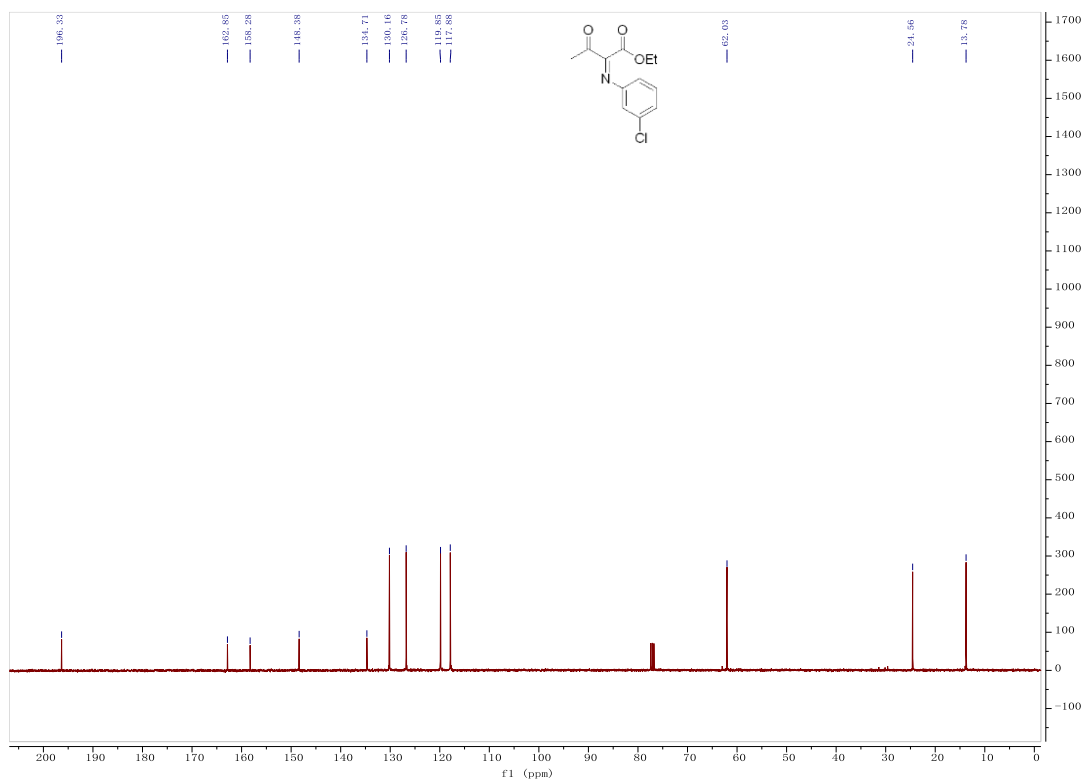

1p

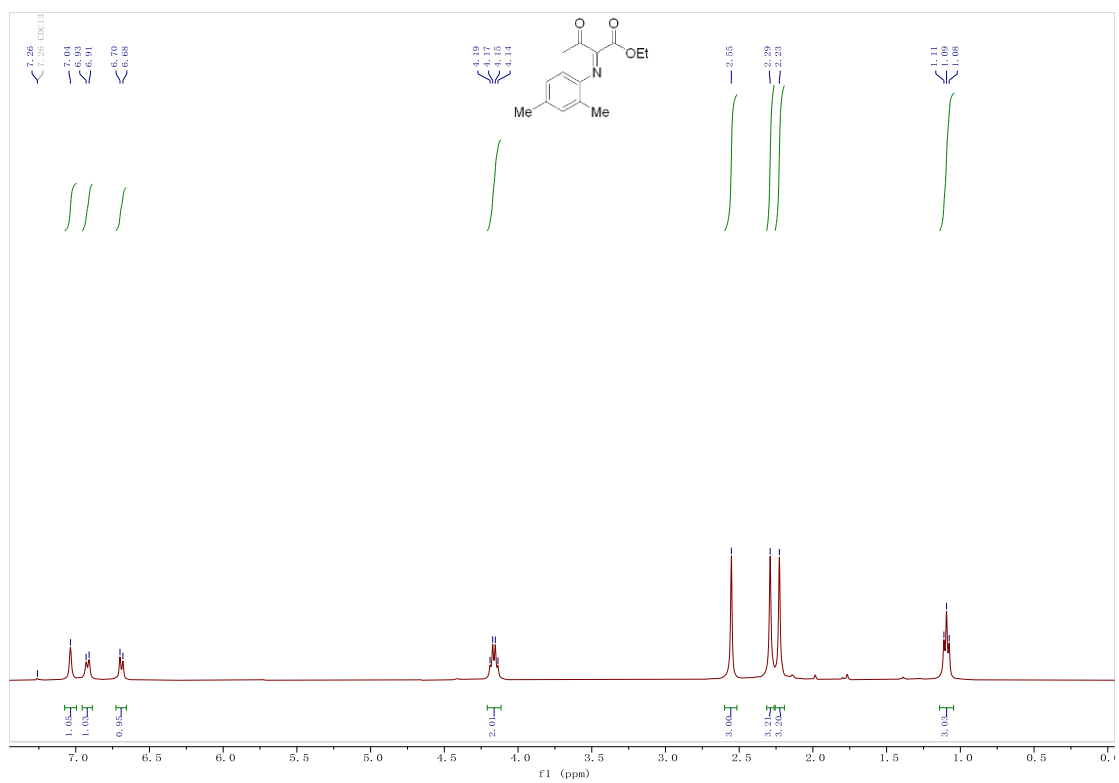

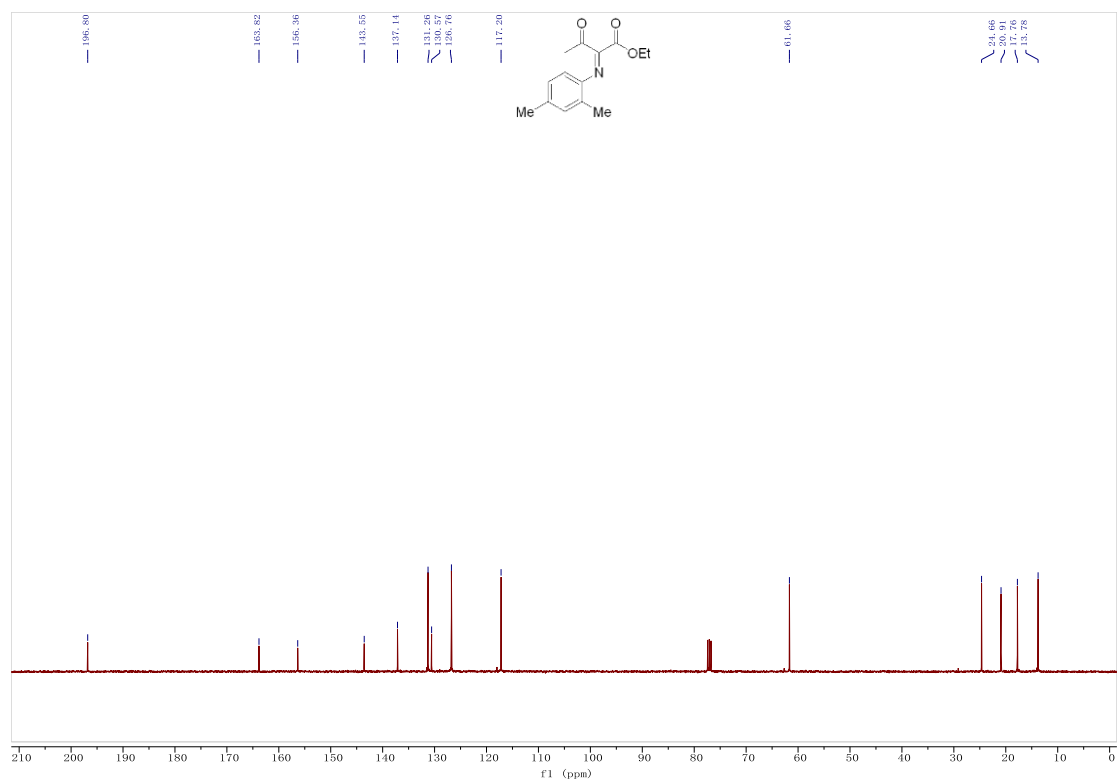

**1q**

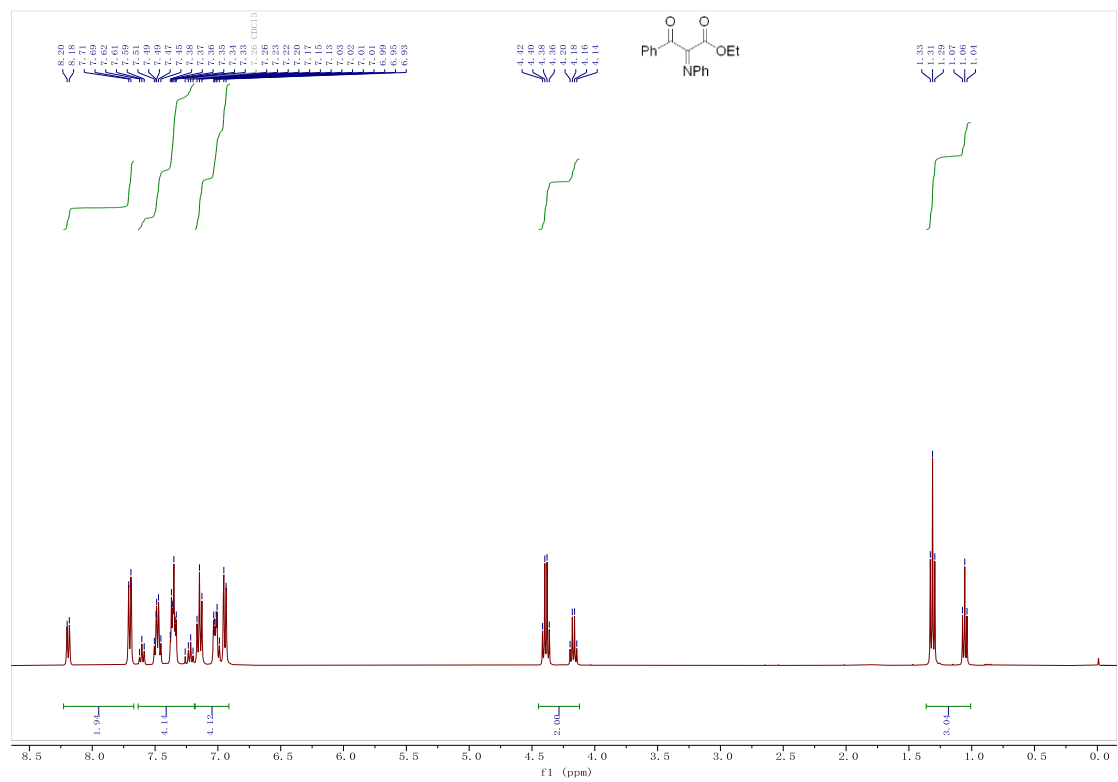



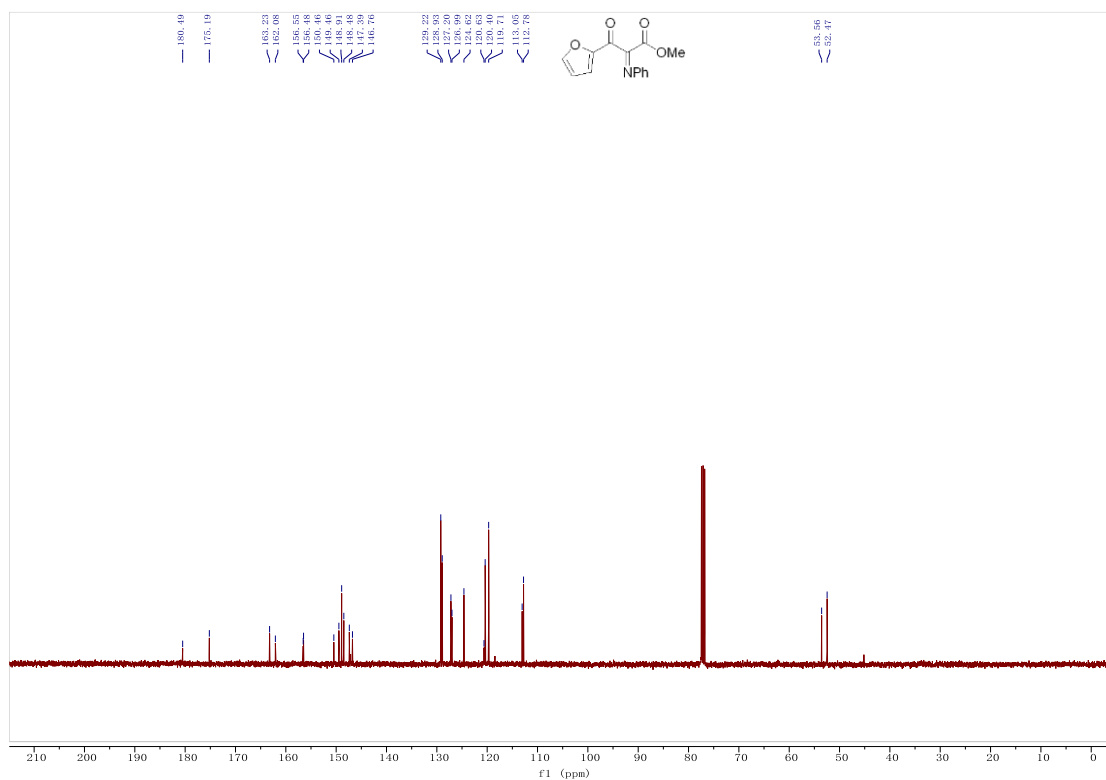

1s

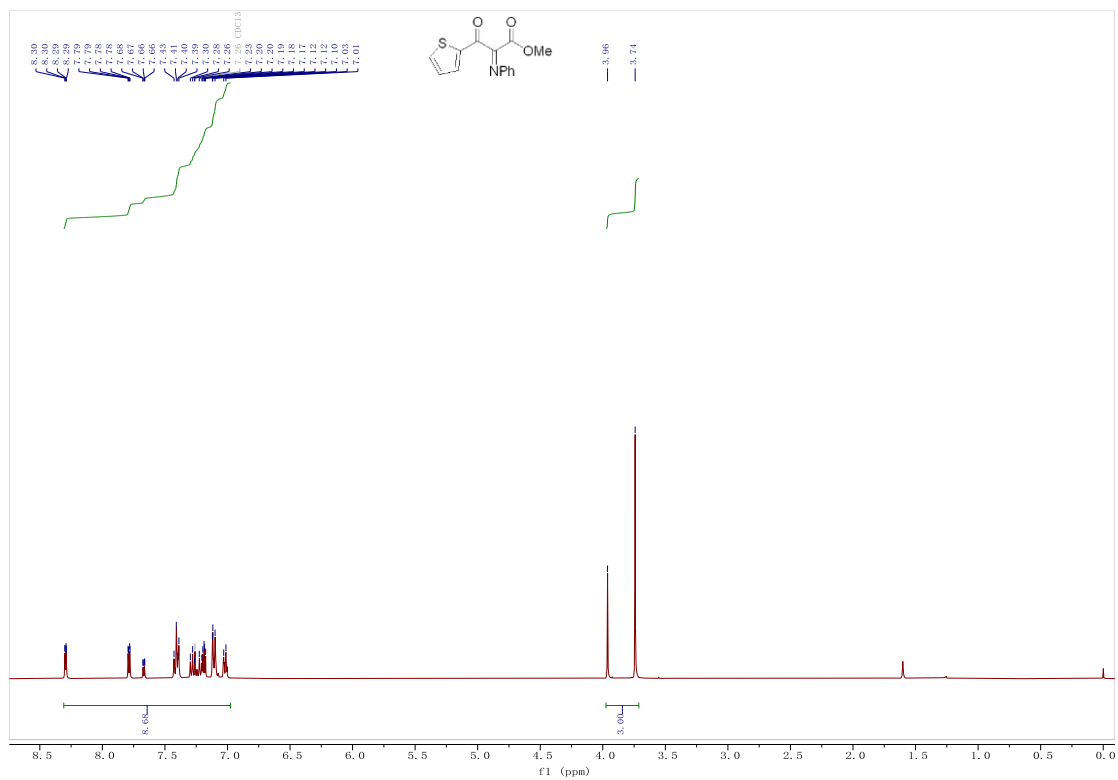

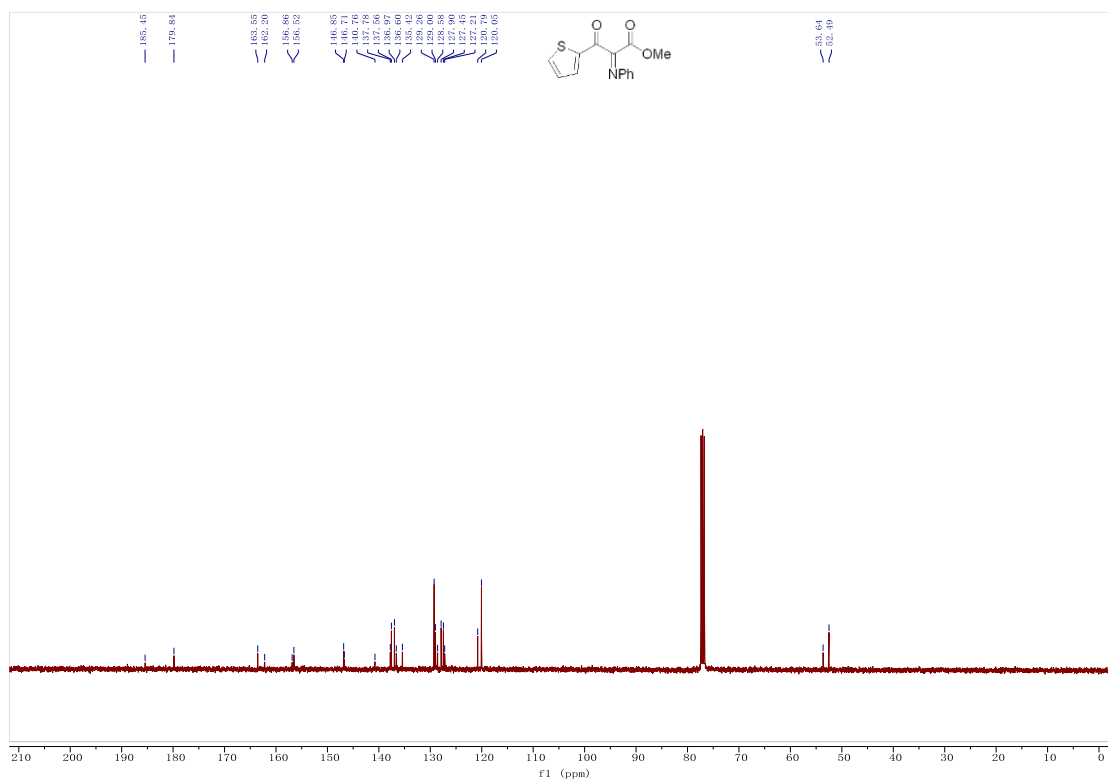

1t

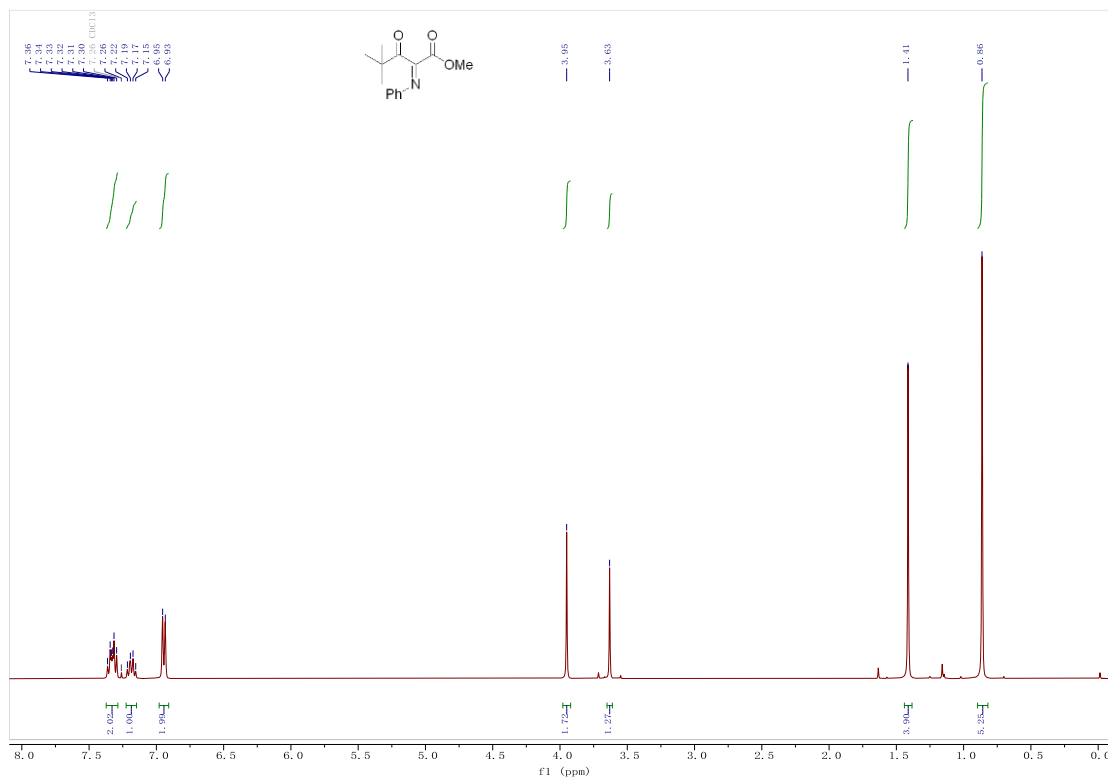



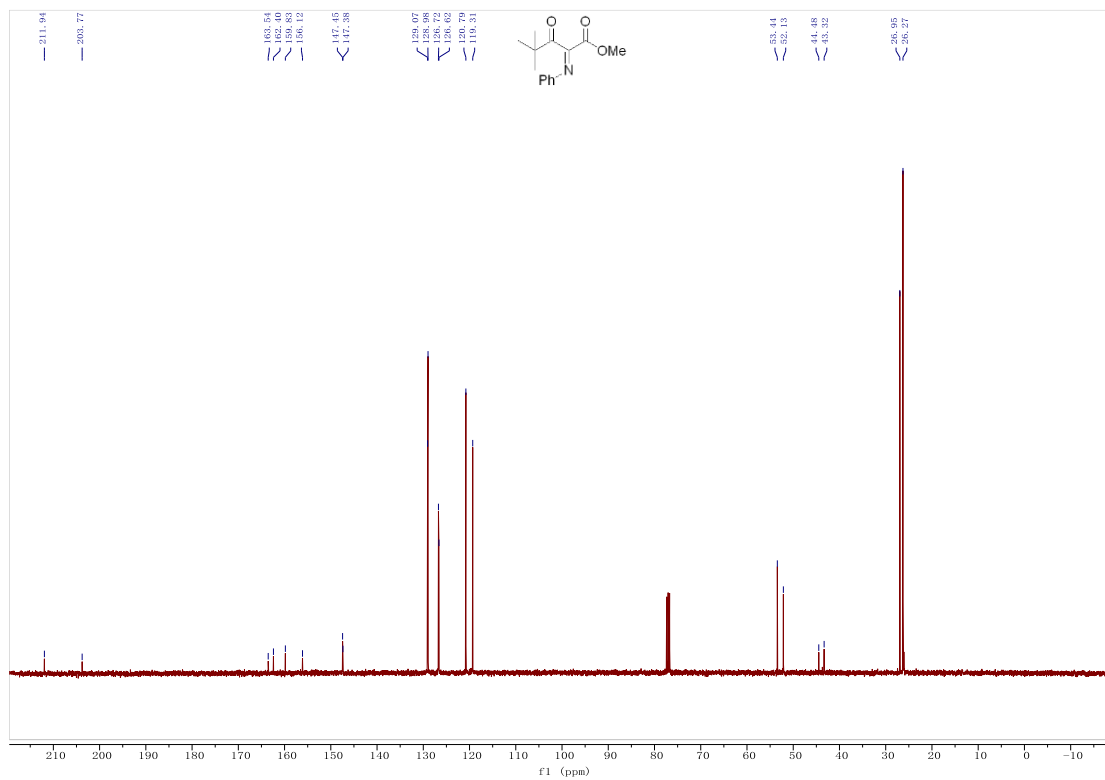

1u

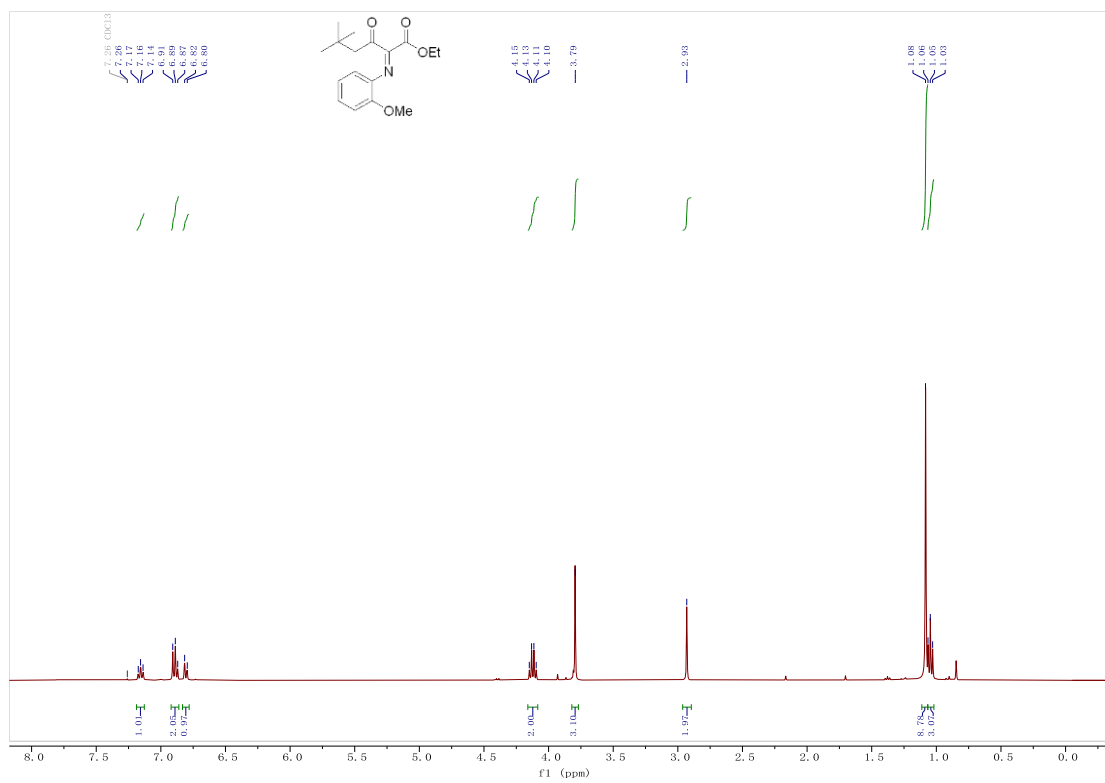

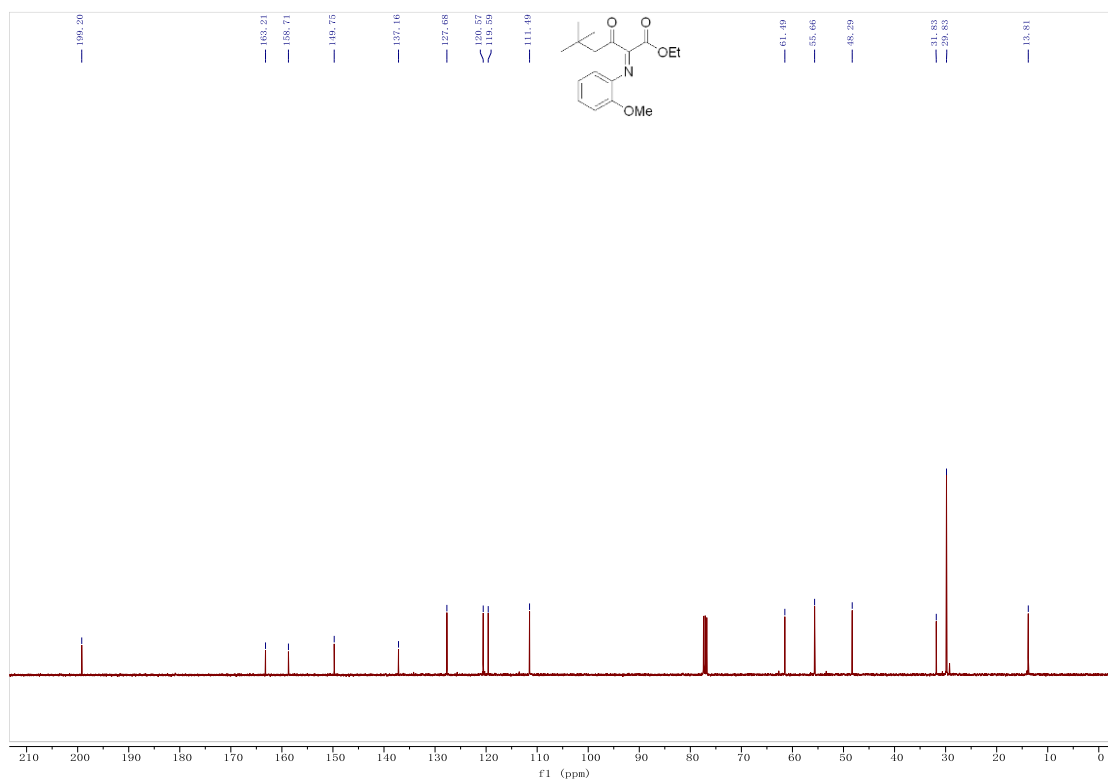

1v

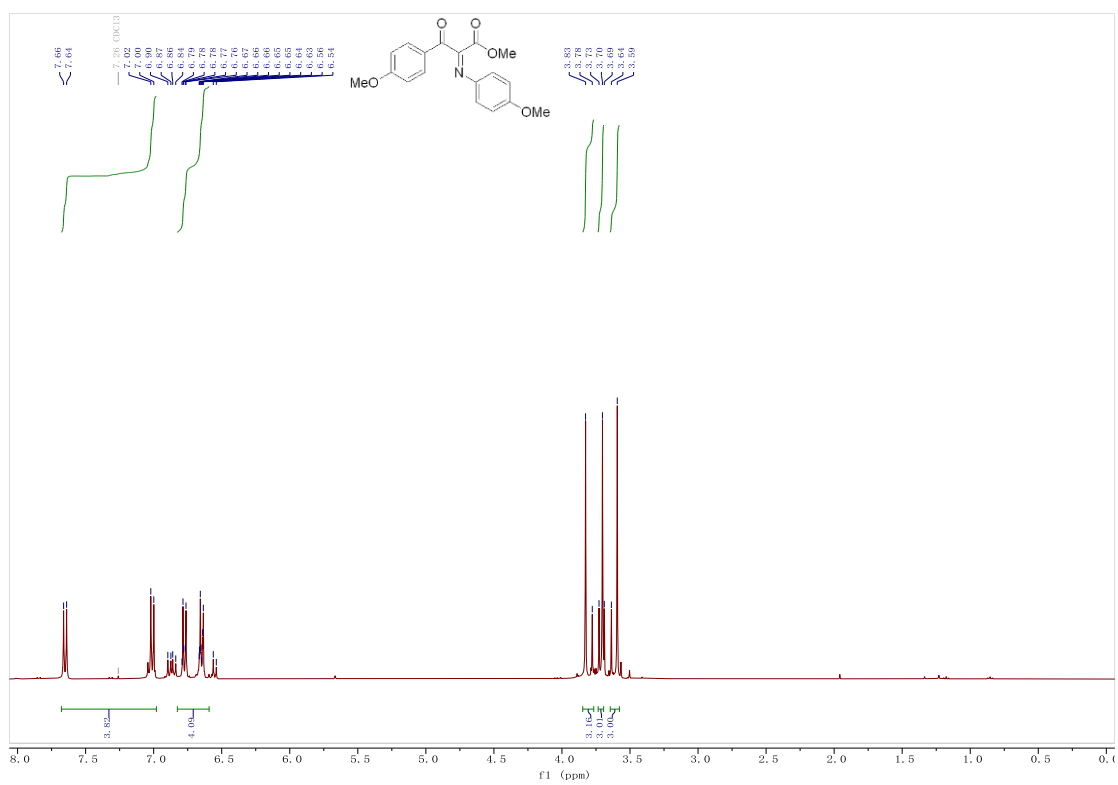

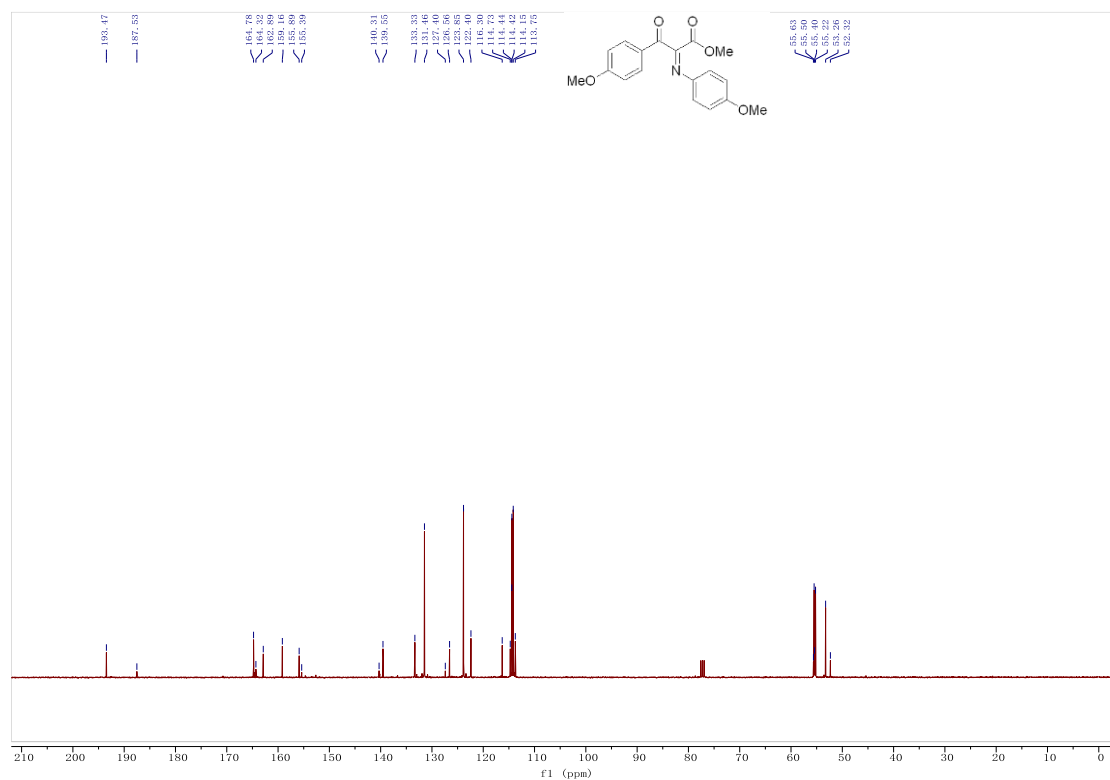

### 3aa

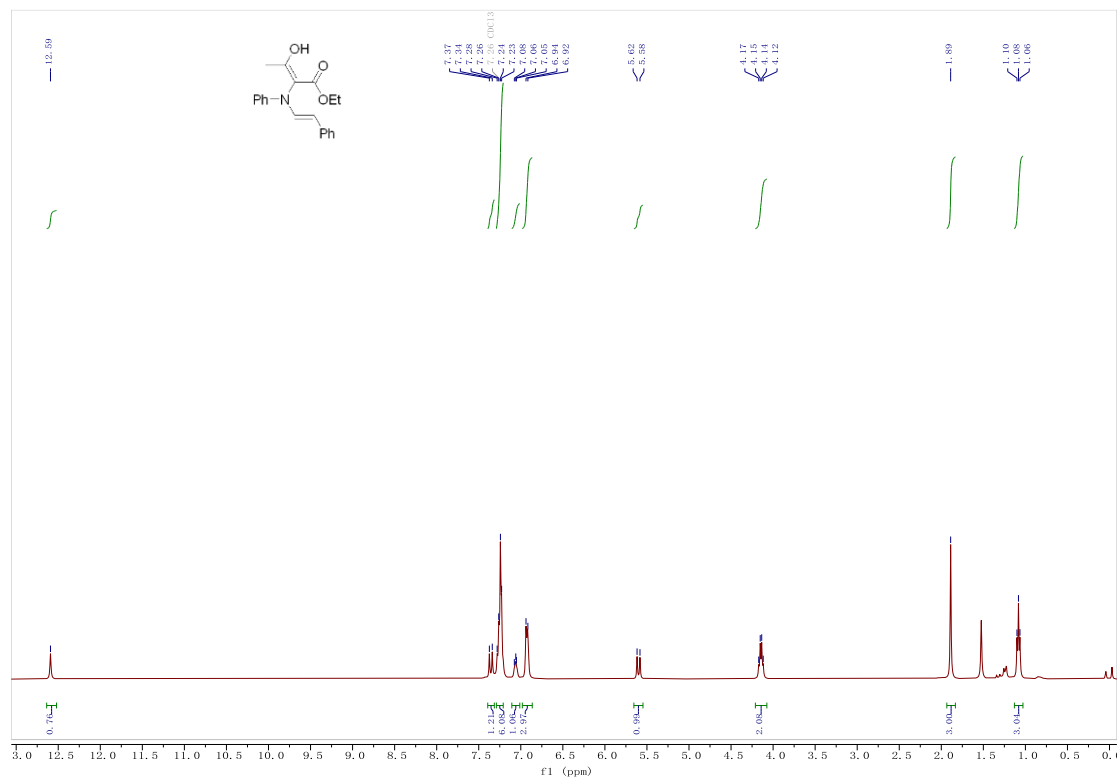

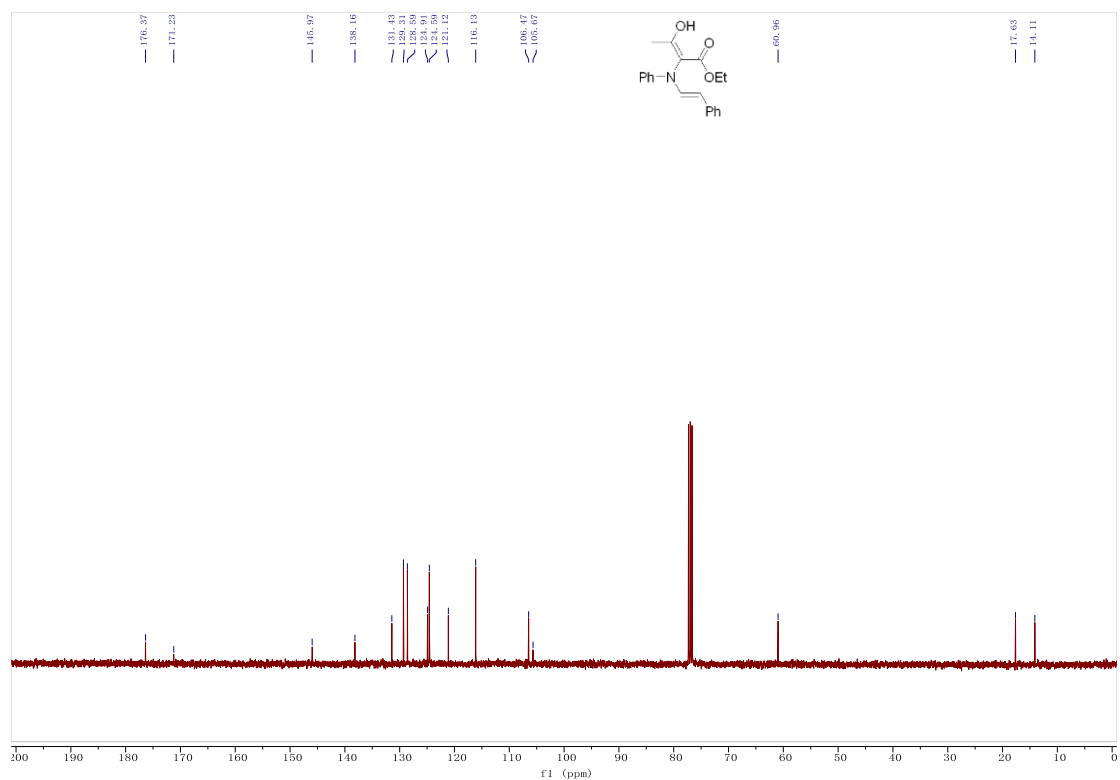

### 3ab

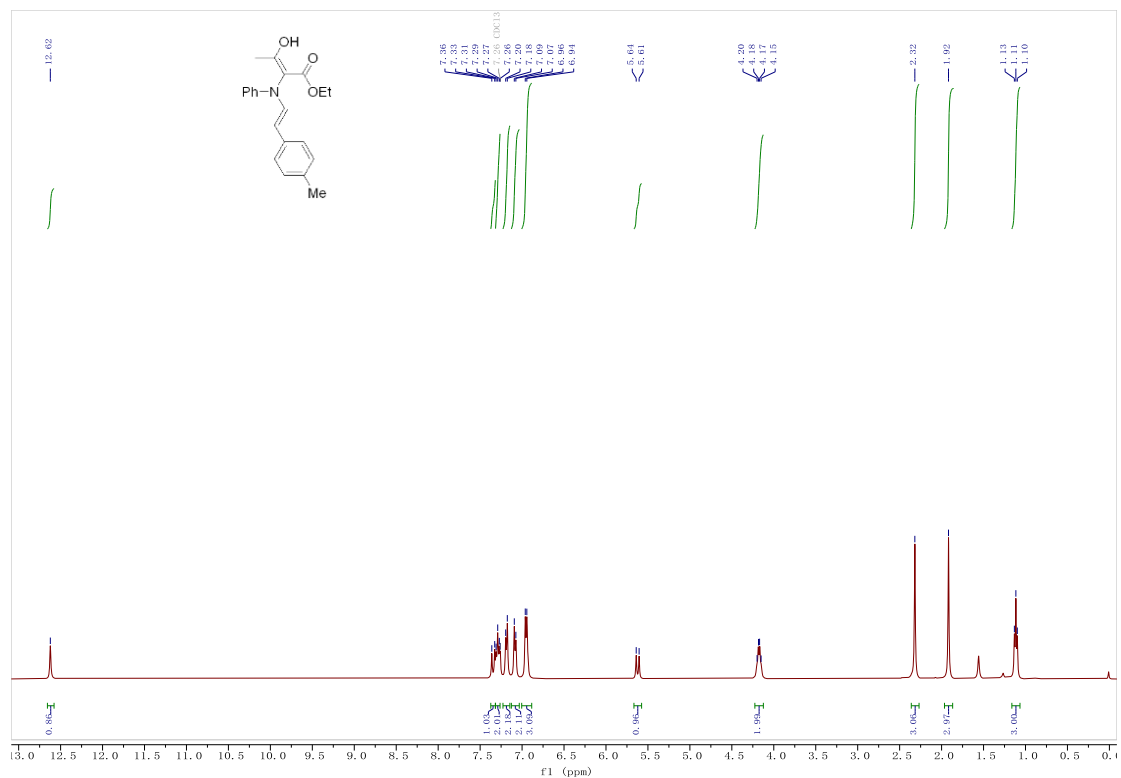

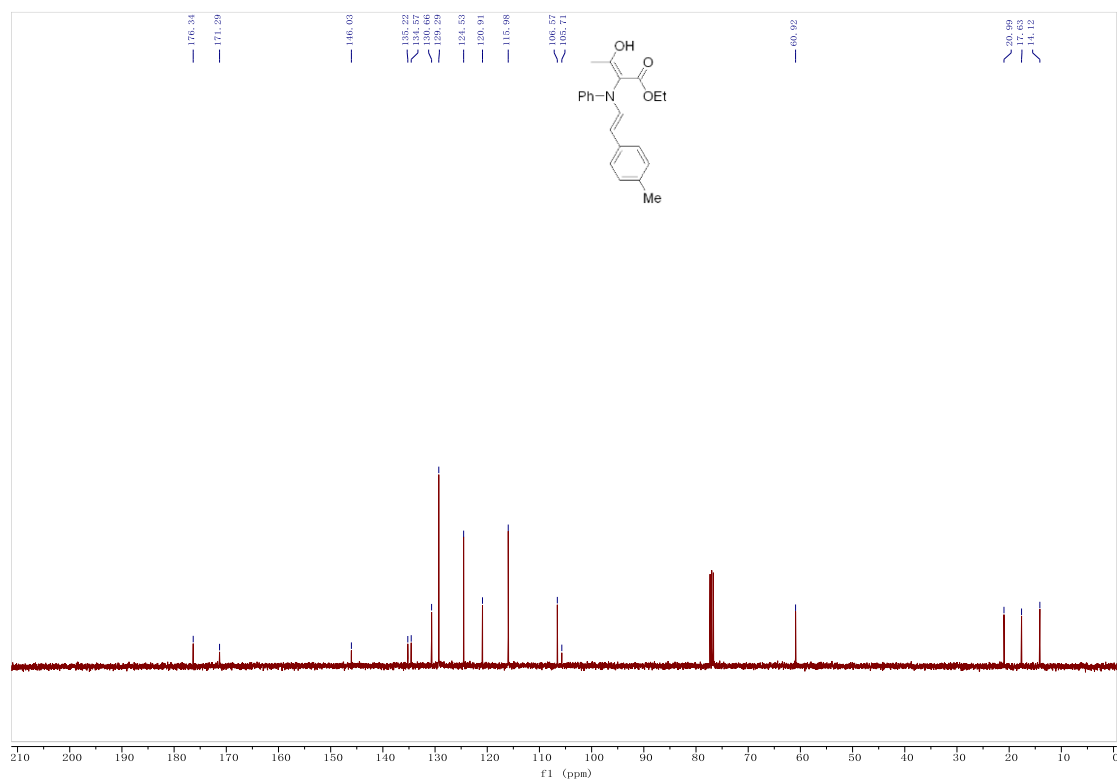

### 3ac

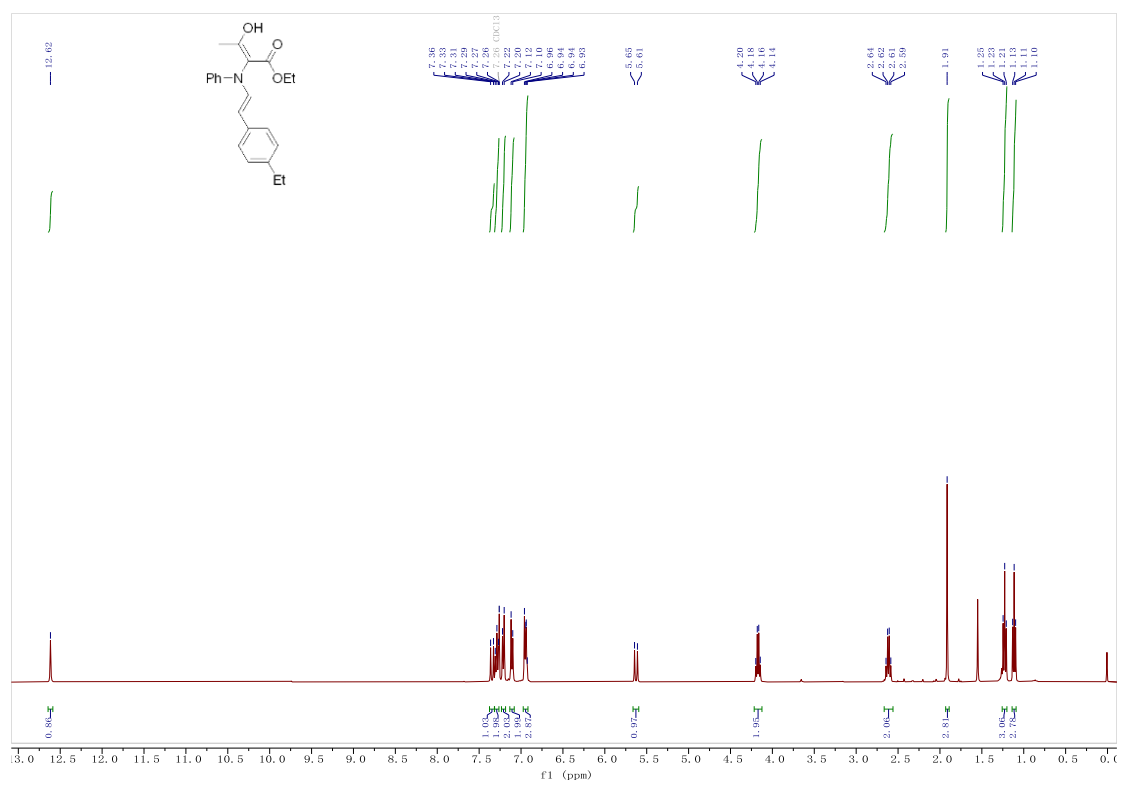

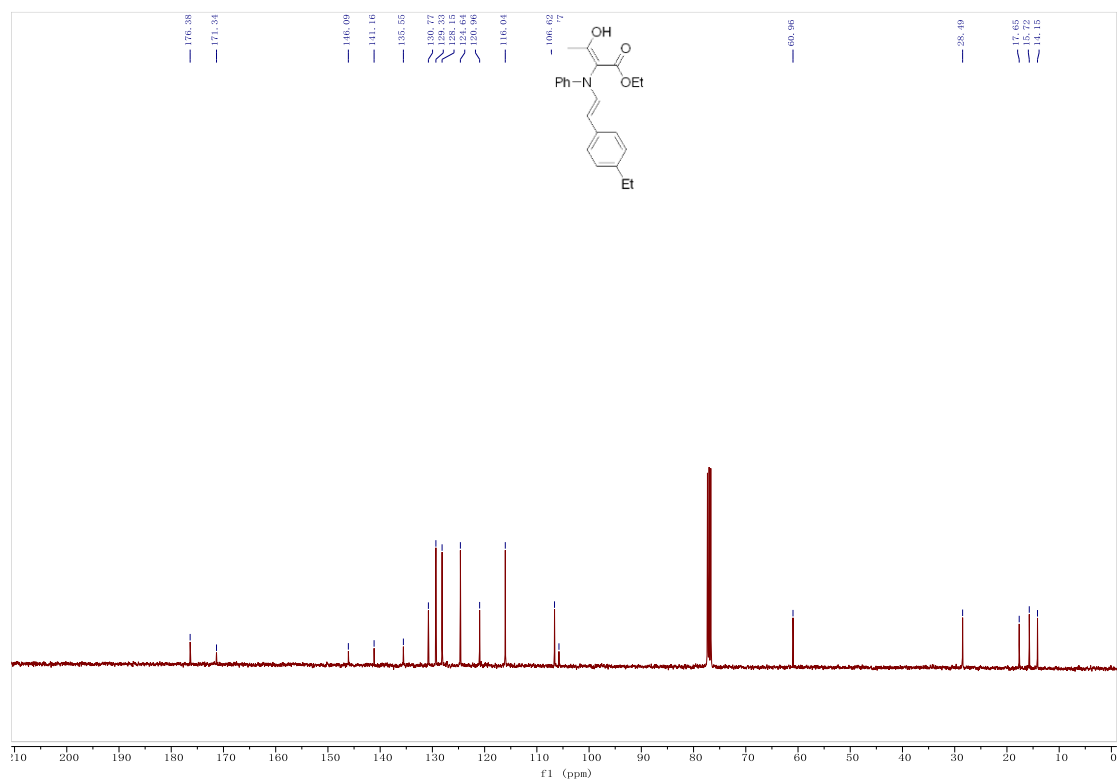

### 3ad

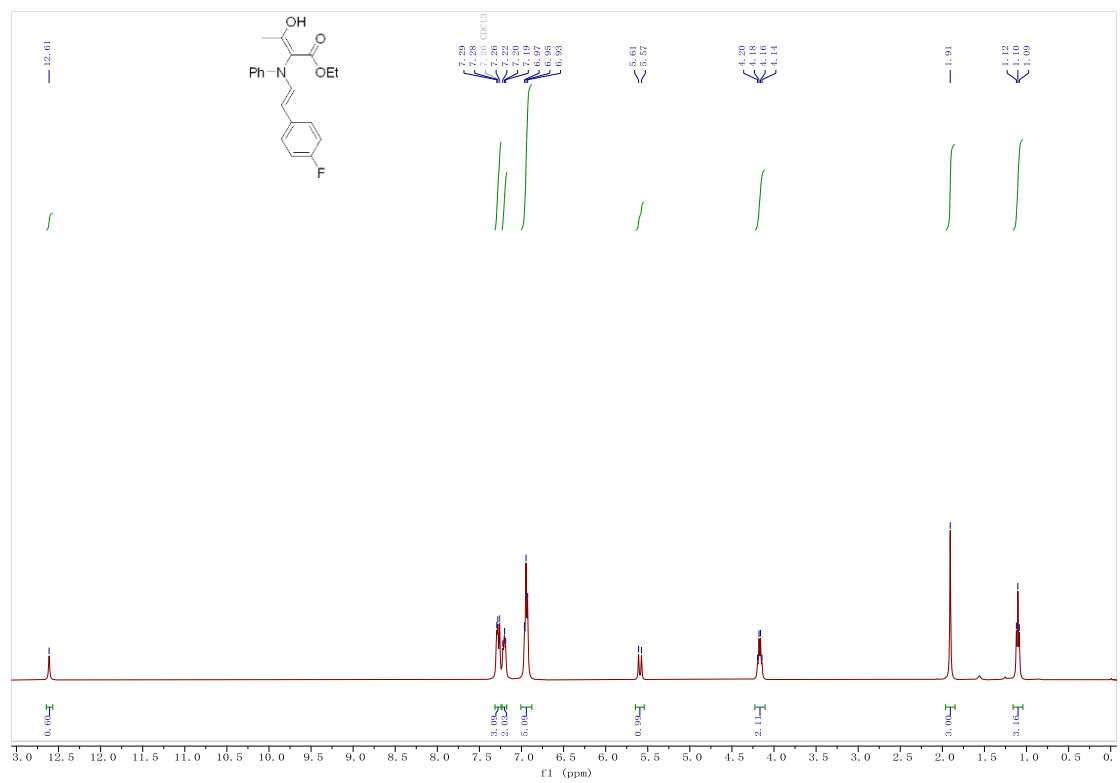

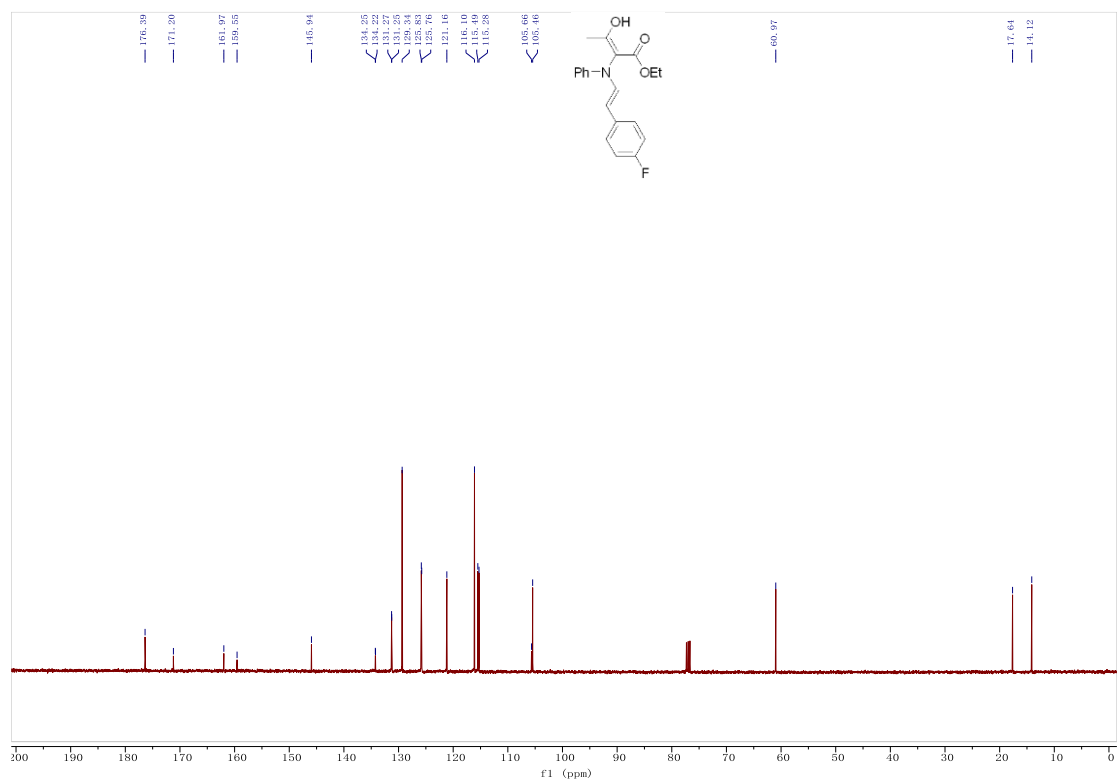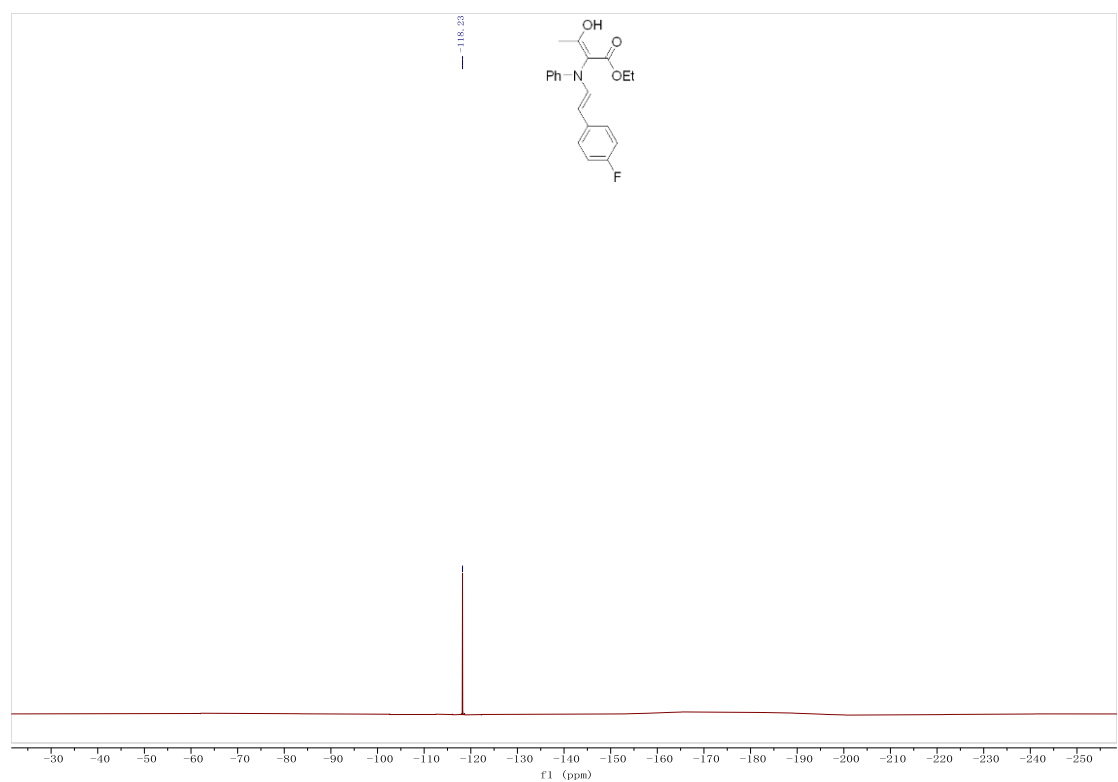

3ae

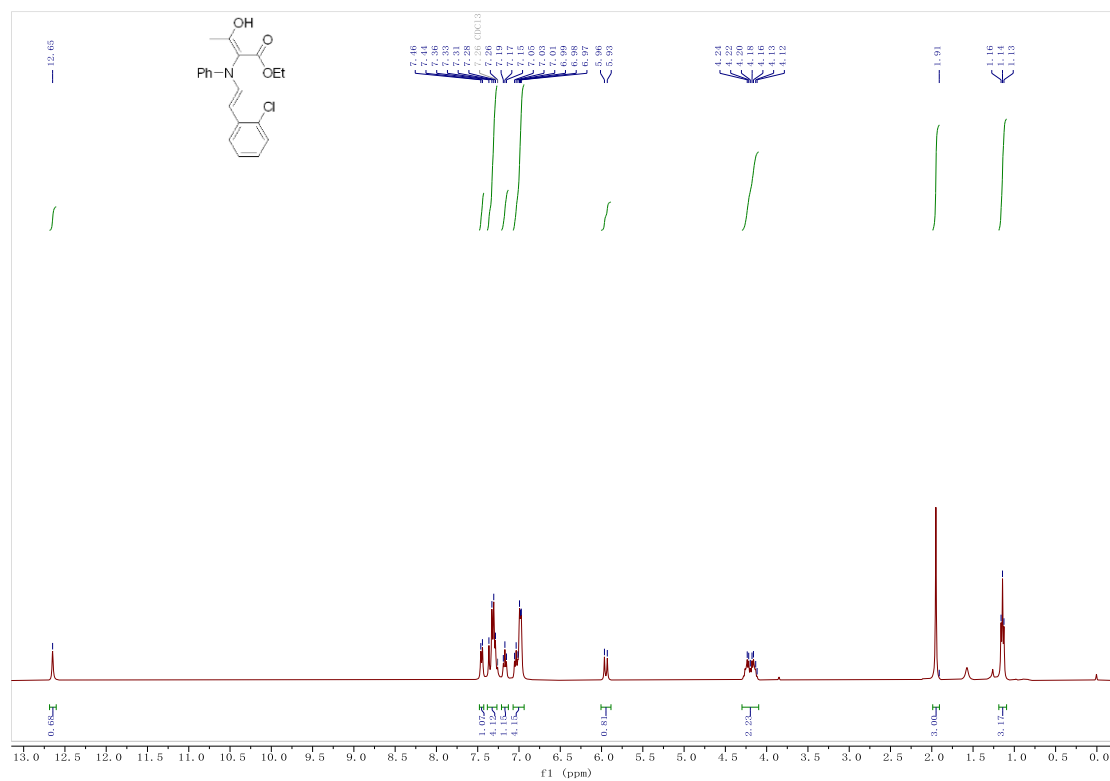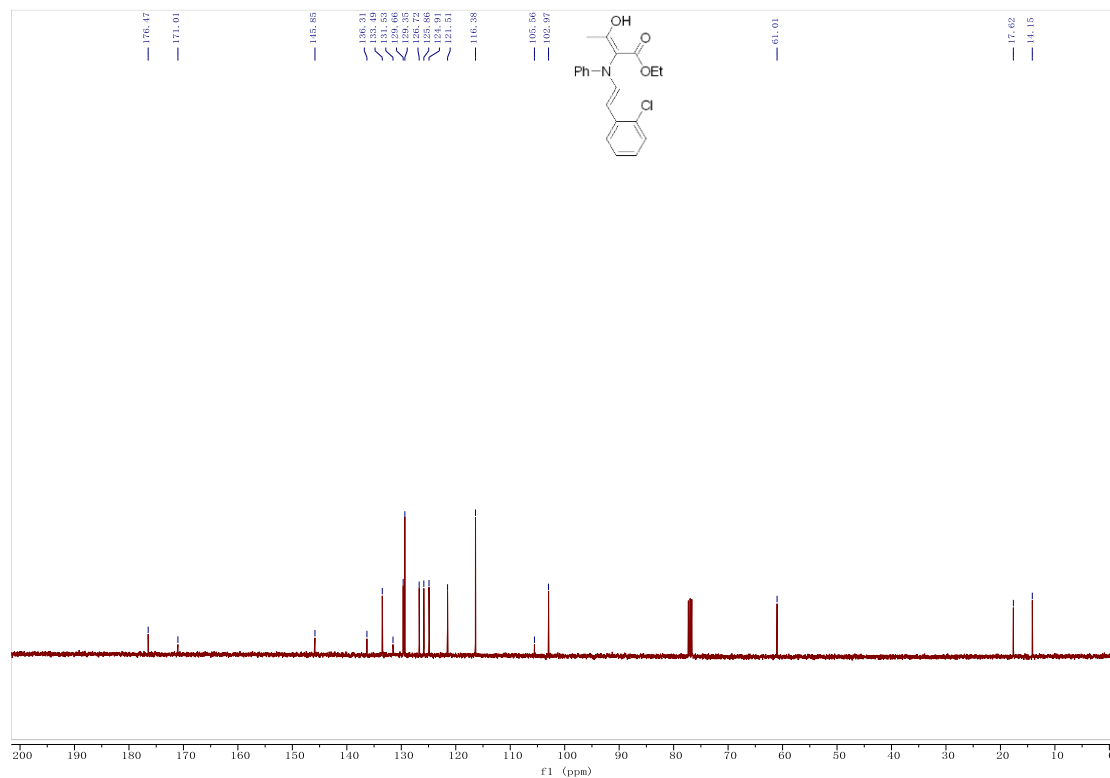



3af

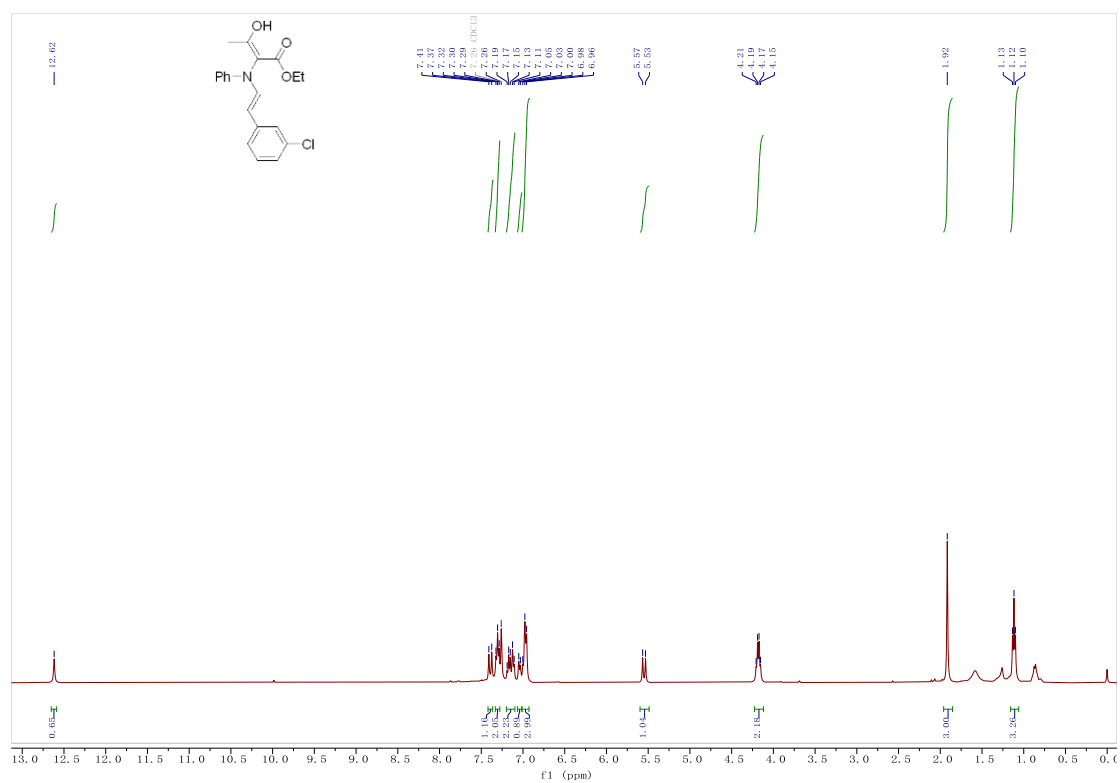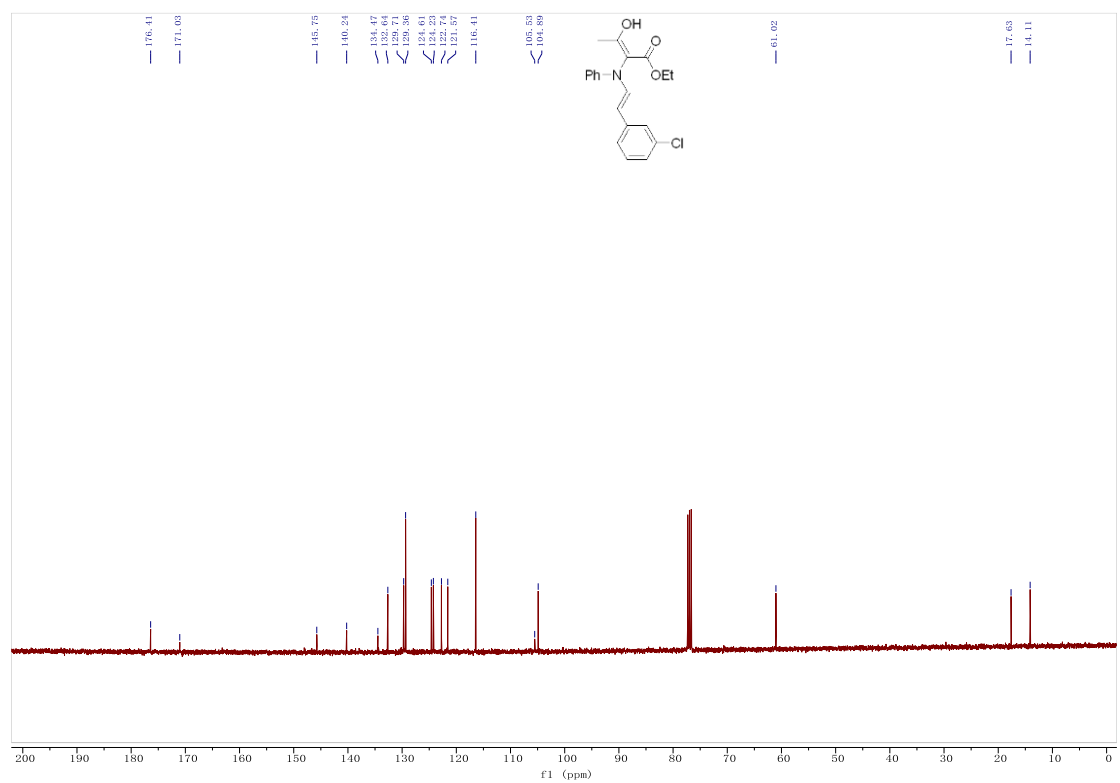

3ag

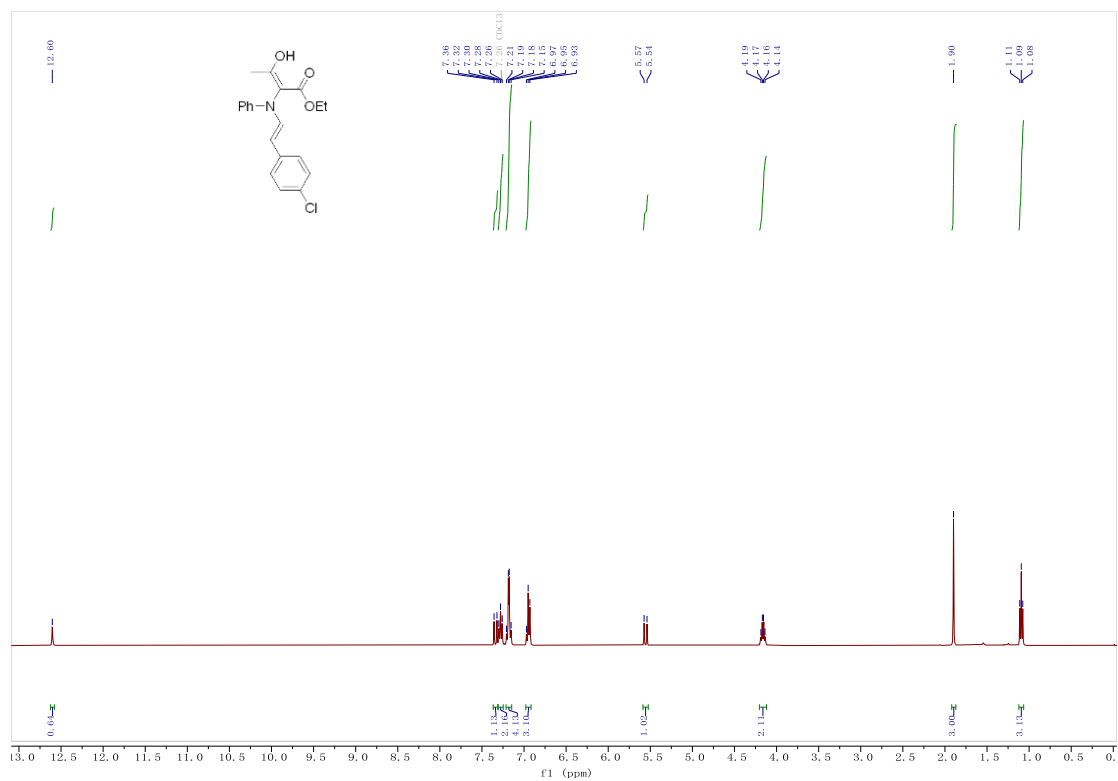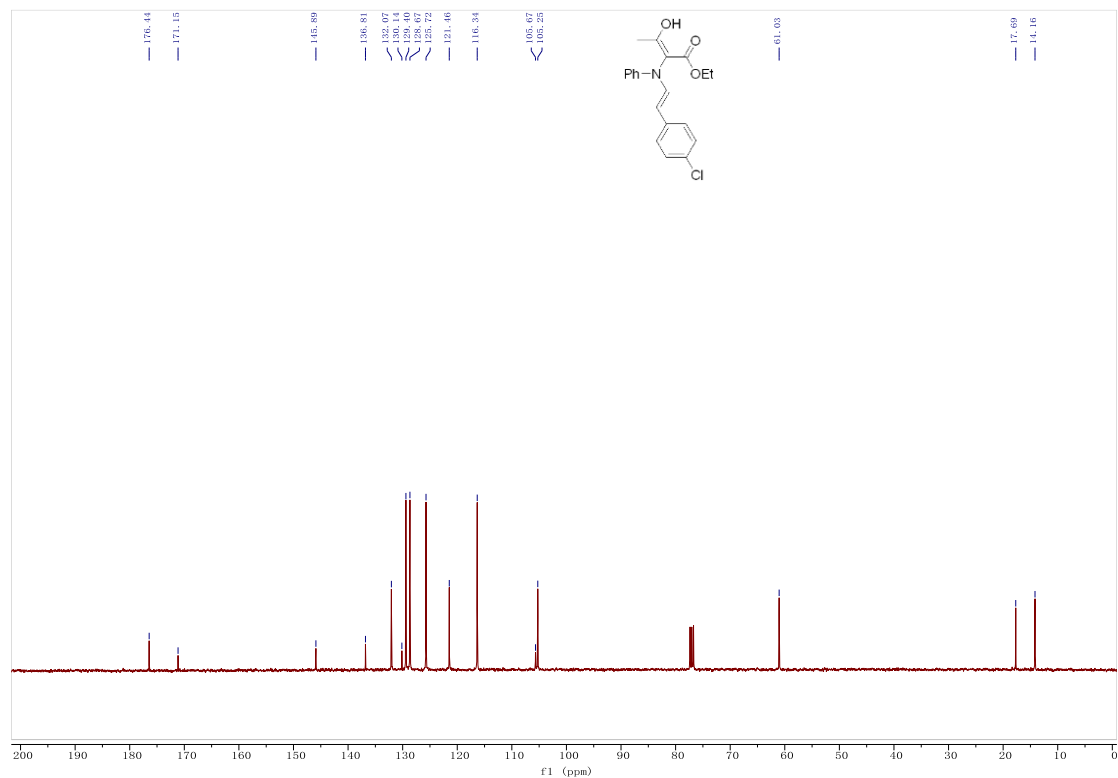

3ah

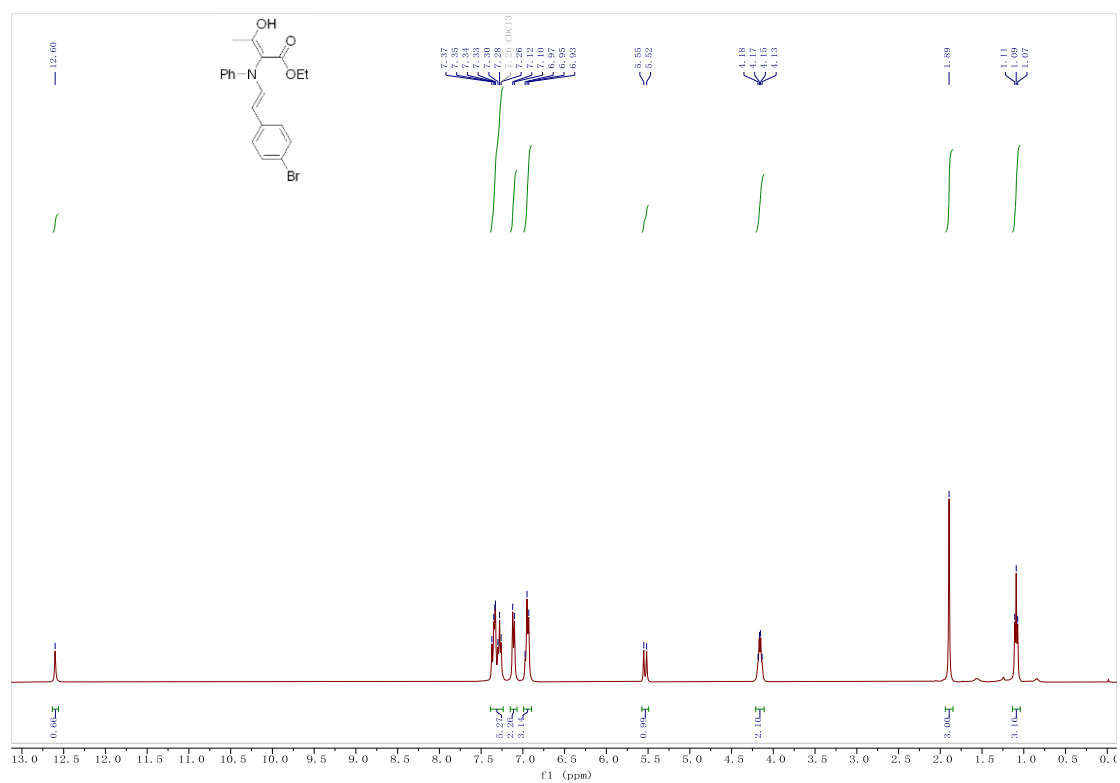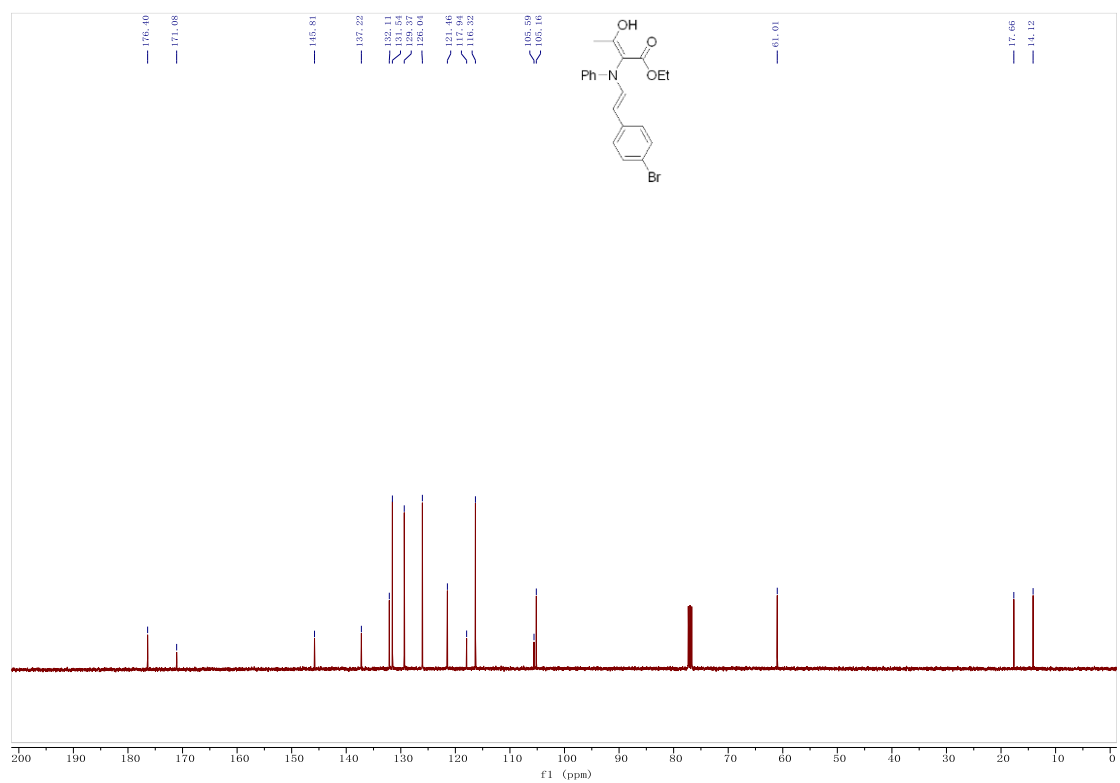

3ai

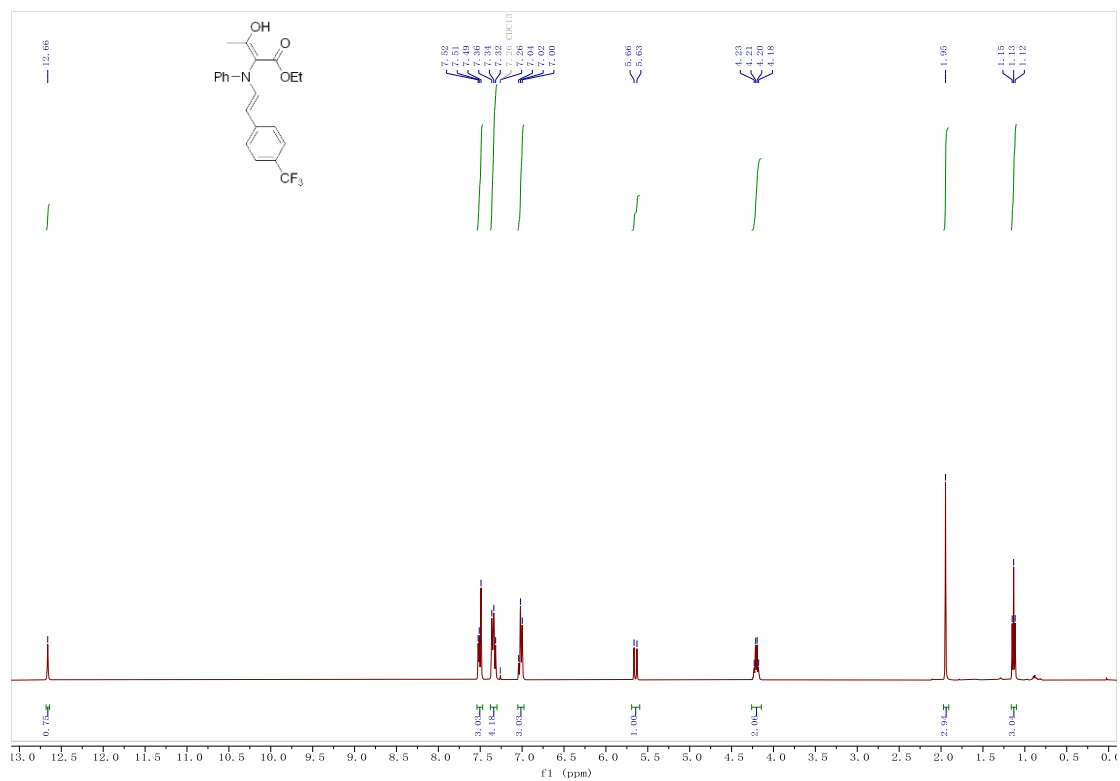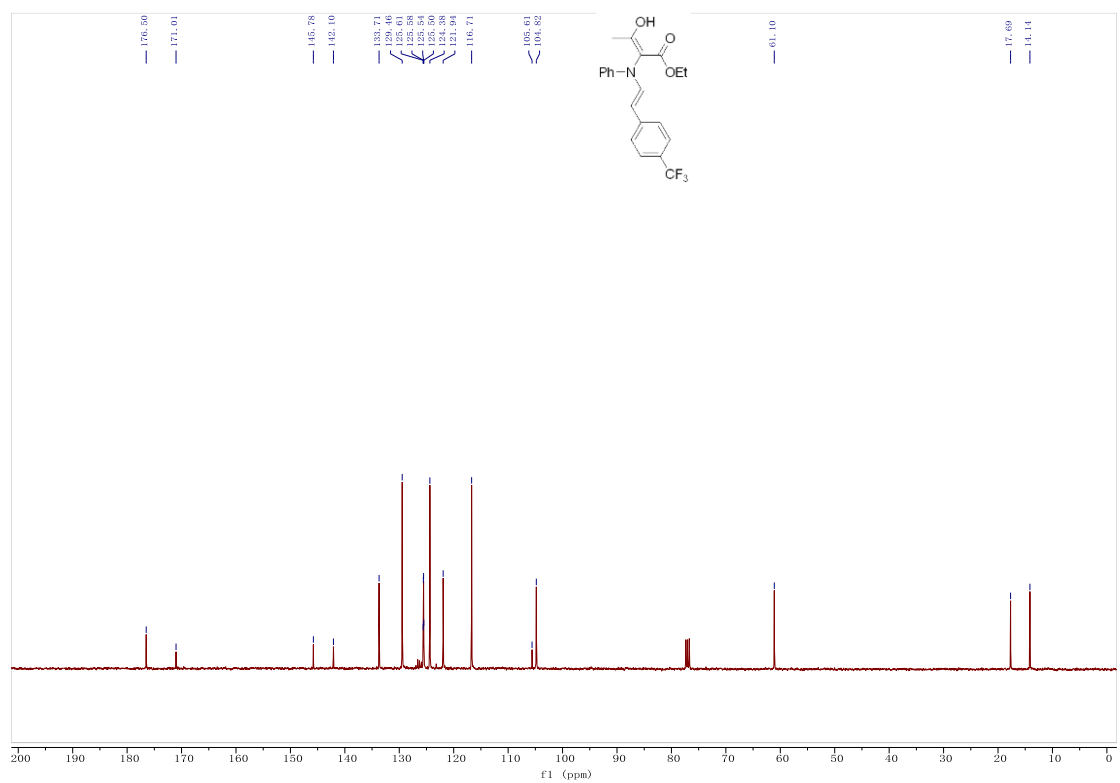

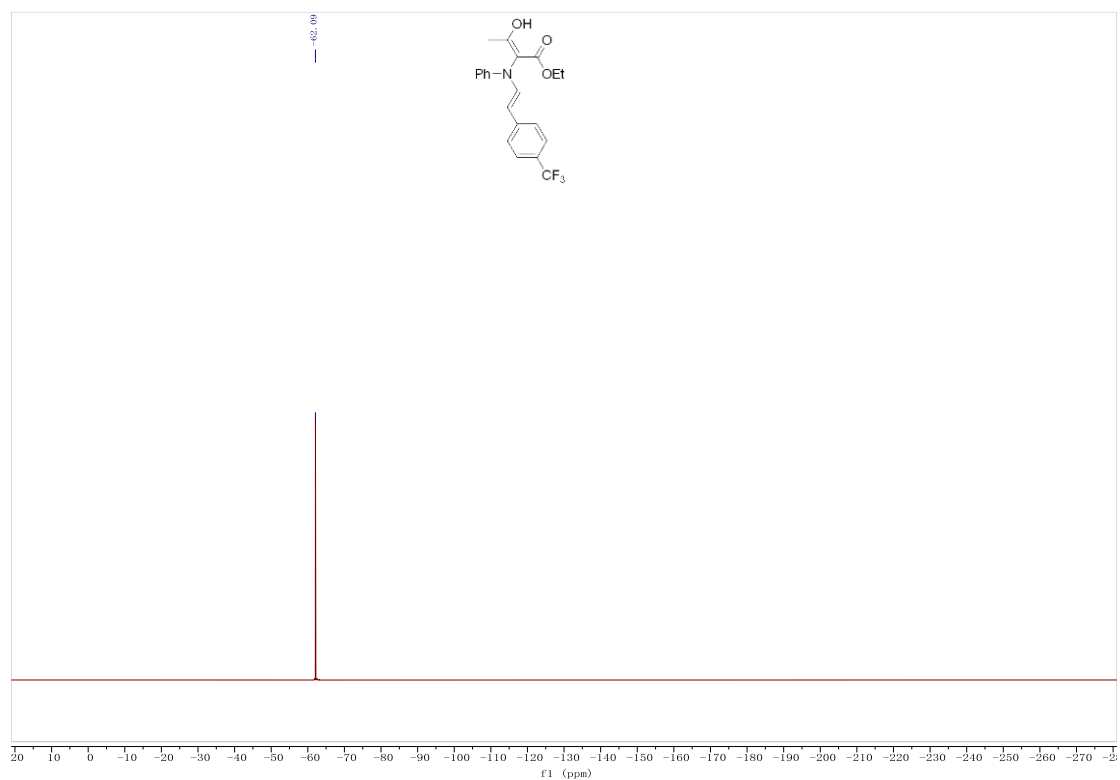

### 3aj

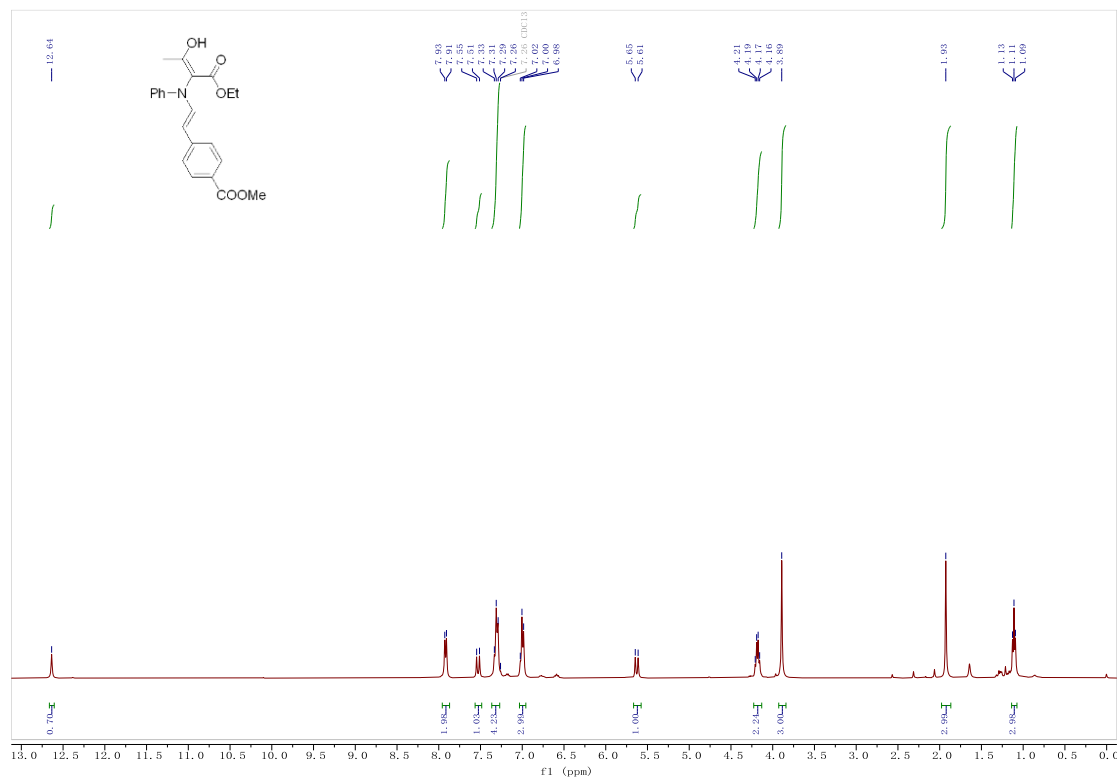

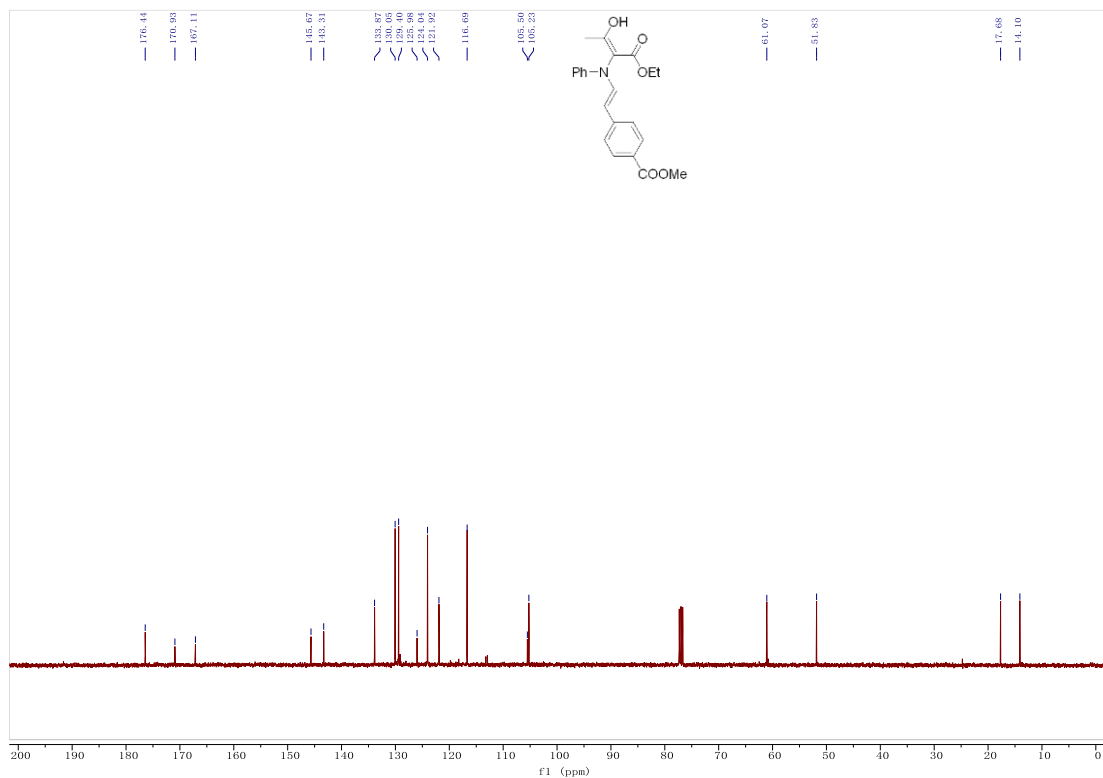

### 3ak

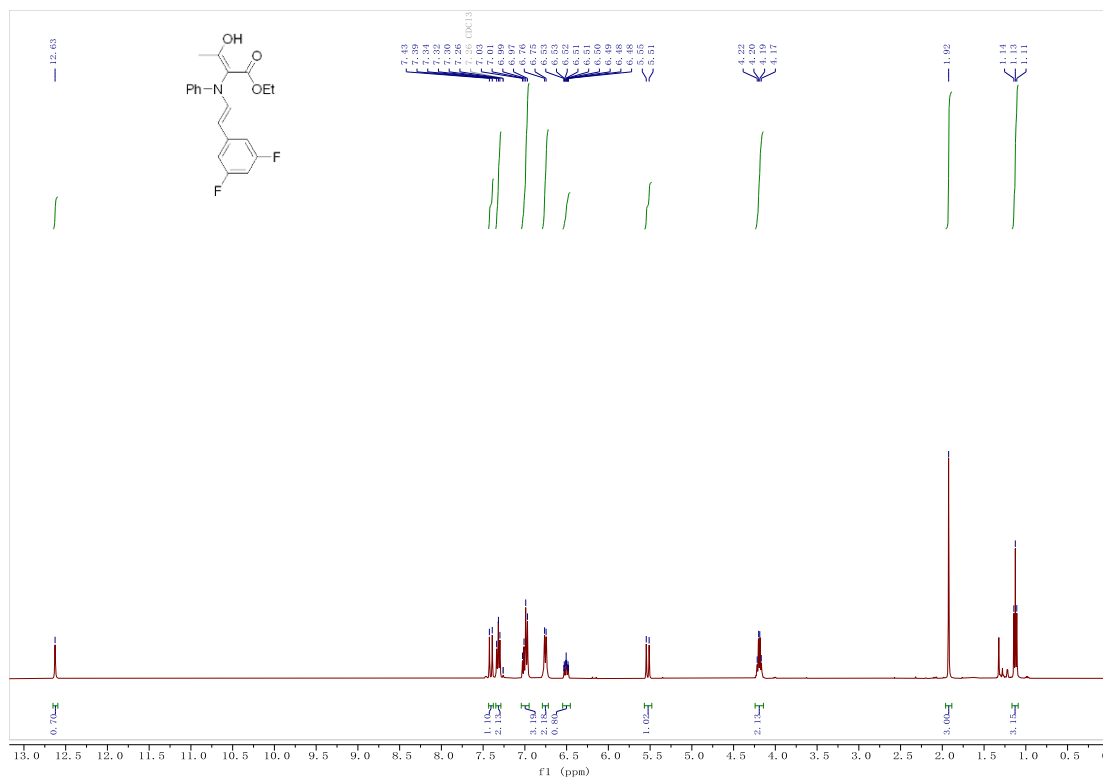

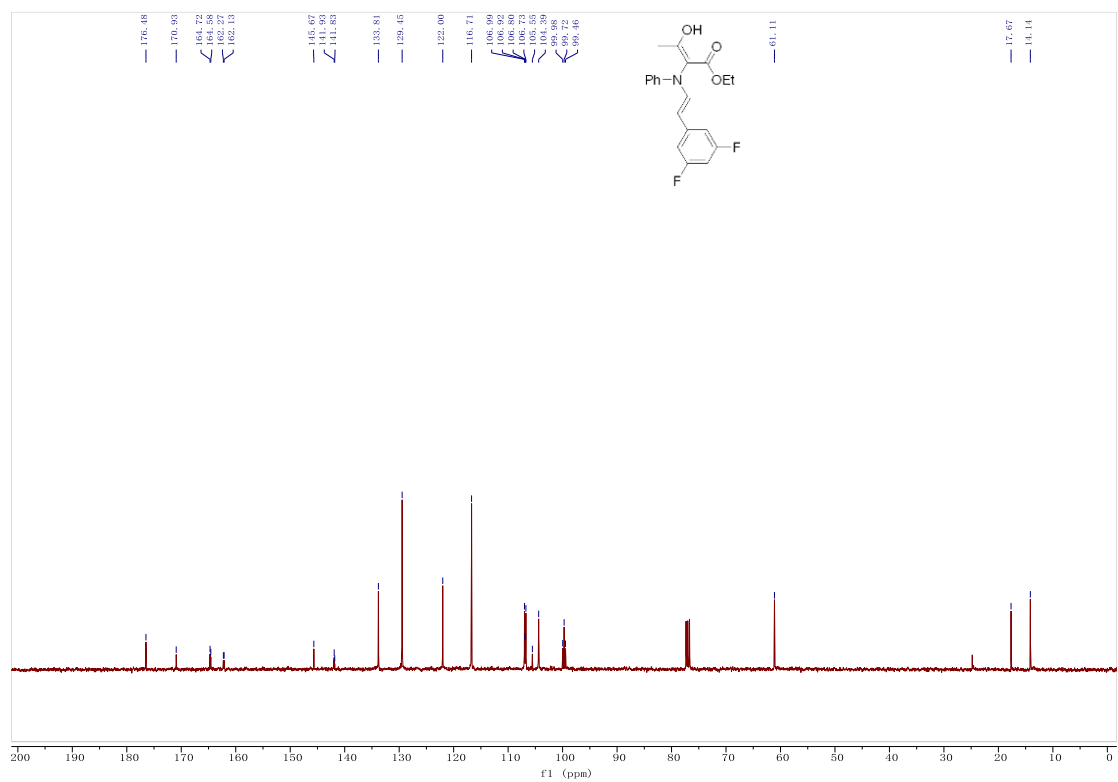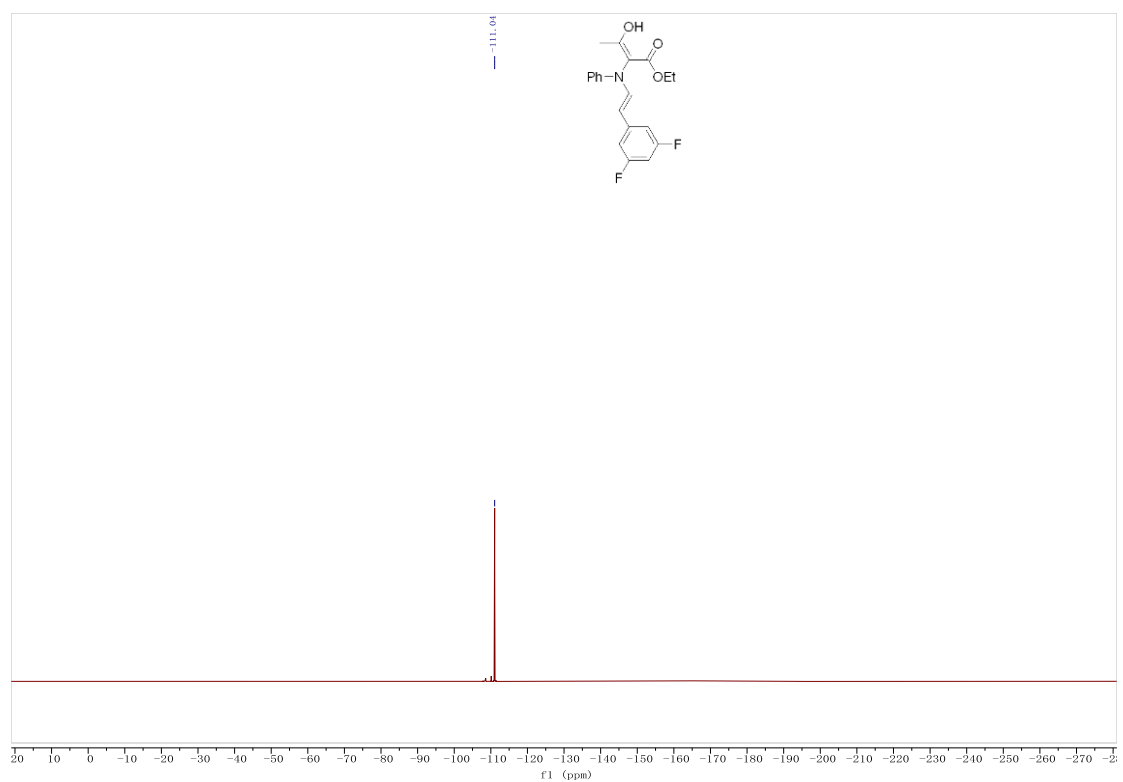

3al

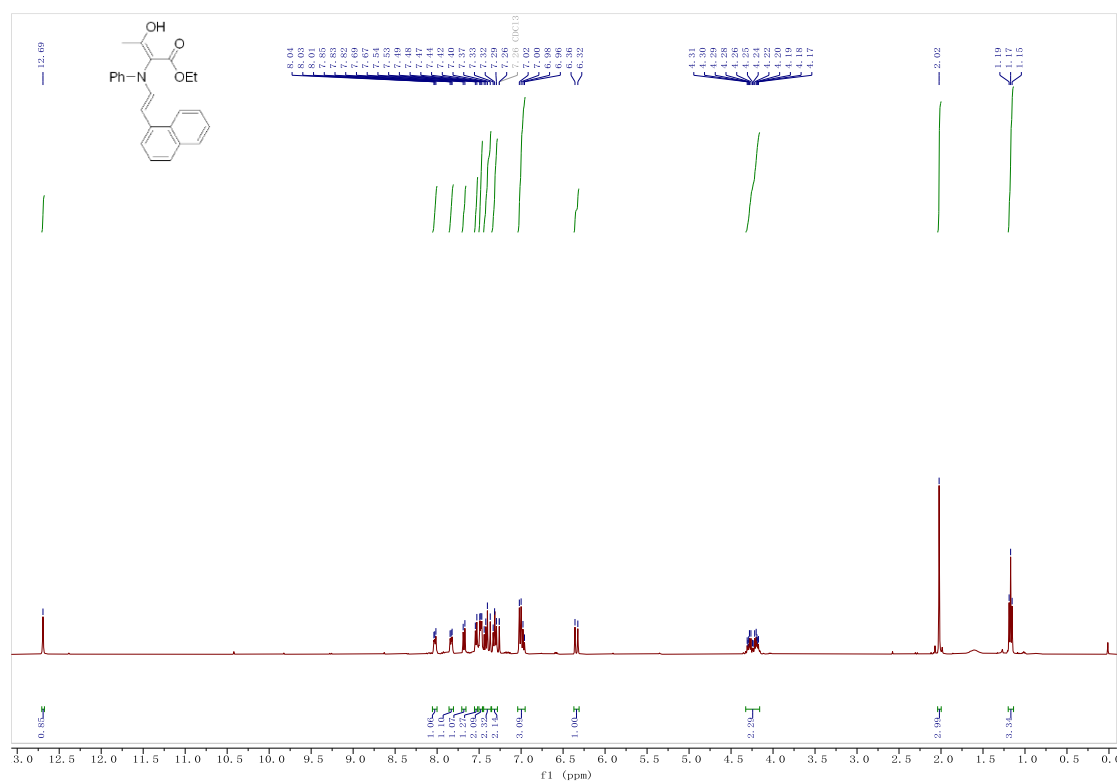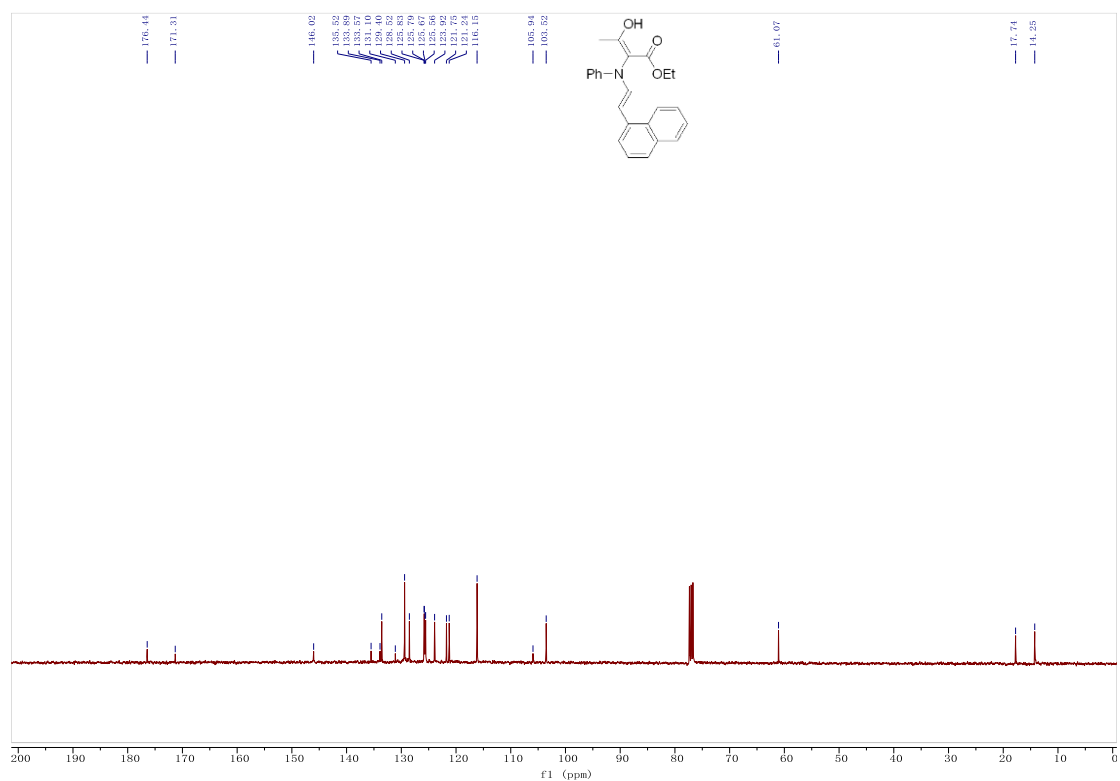



3am

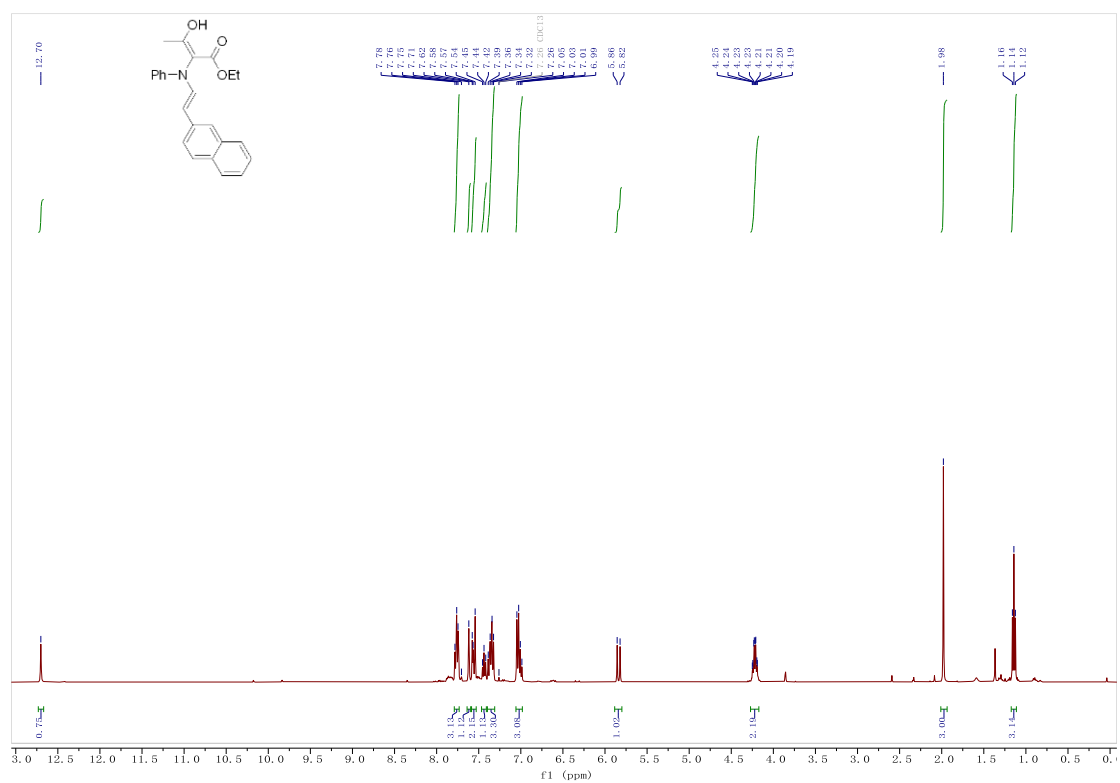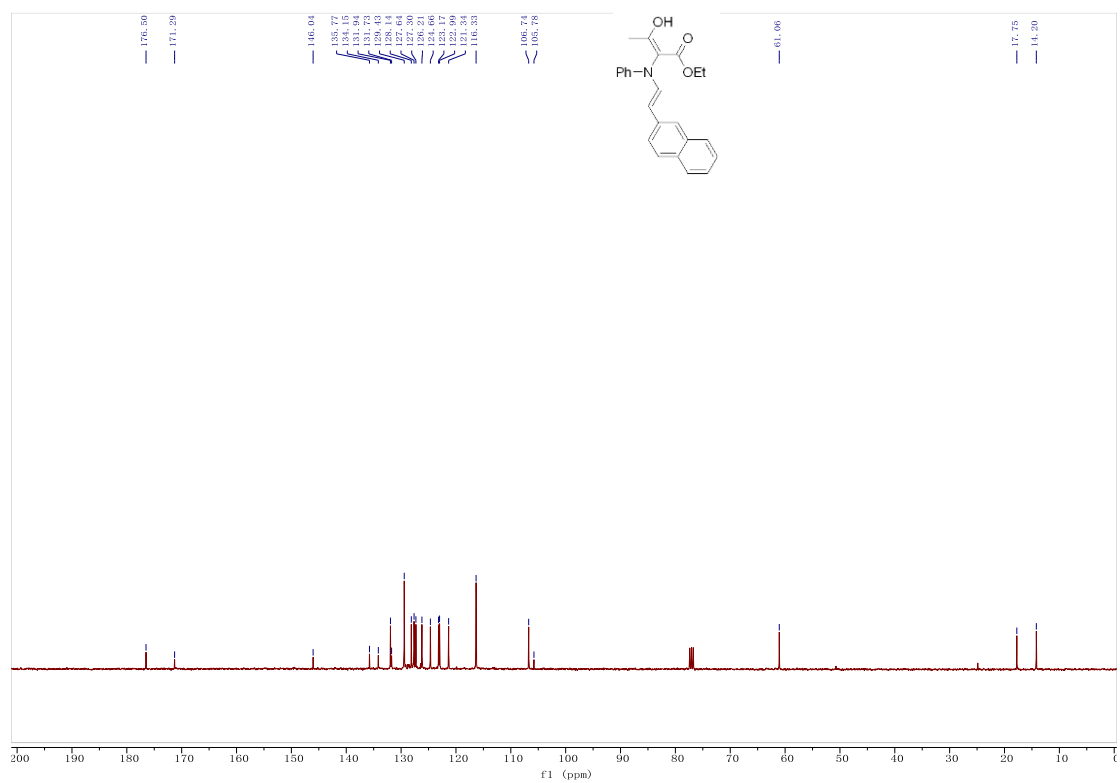

3an

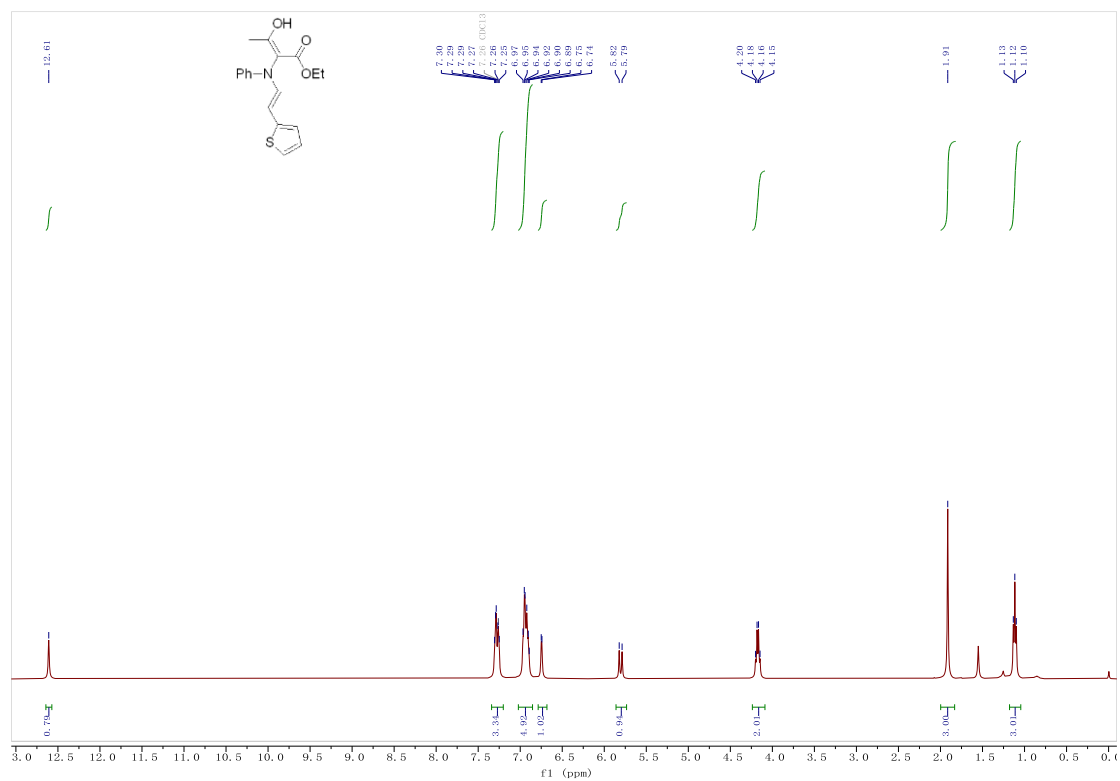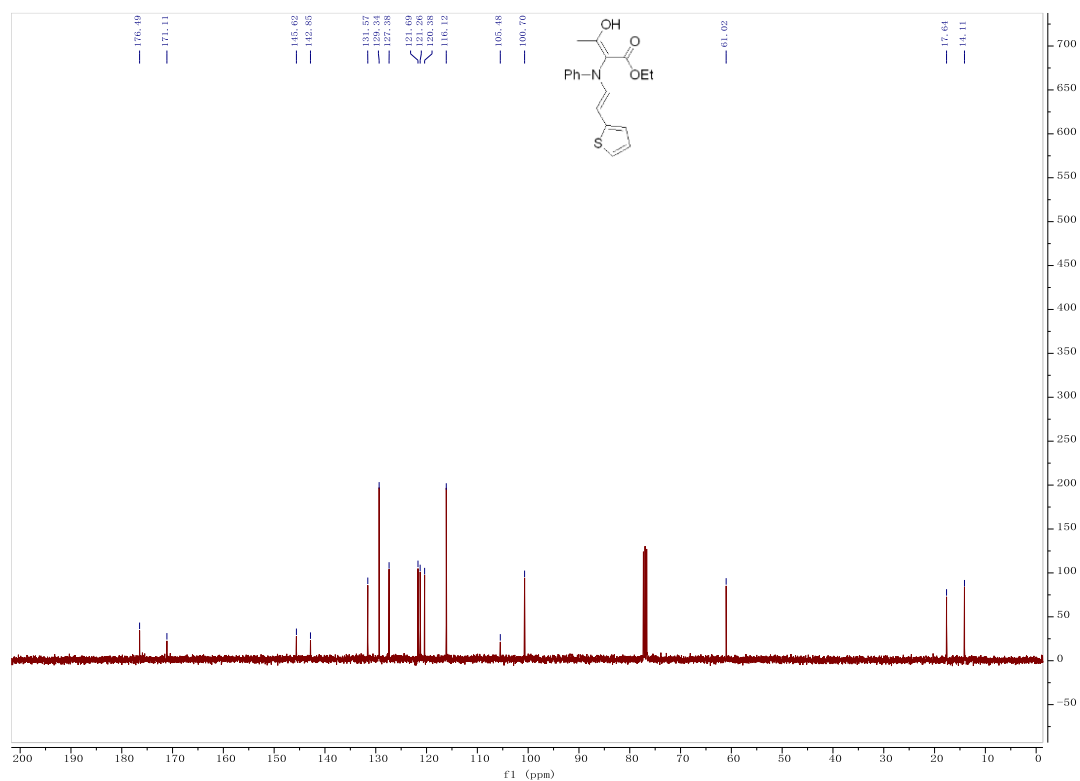

3ao

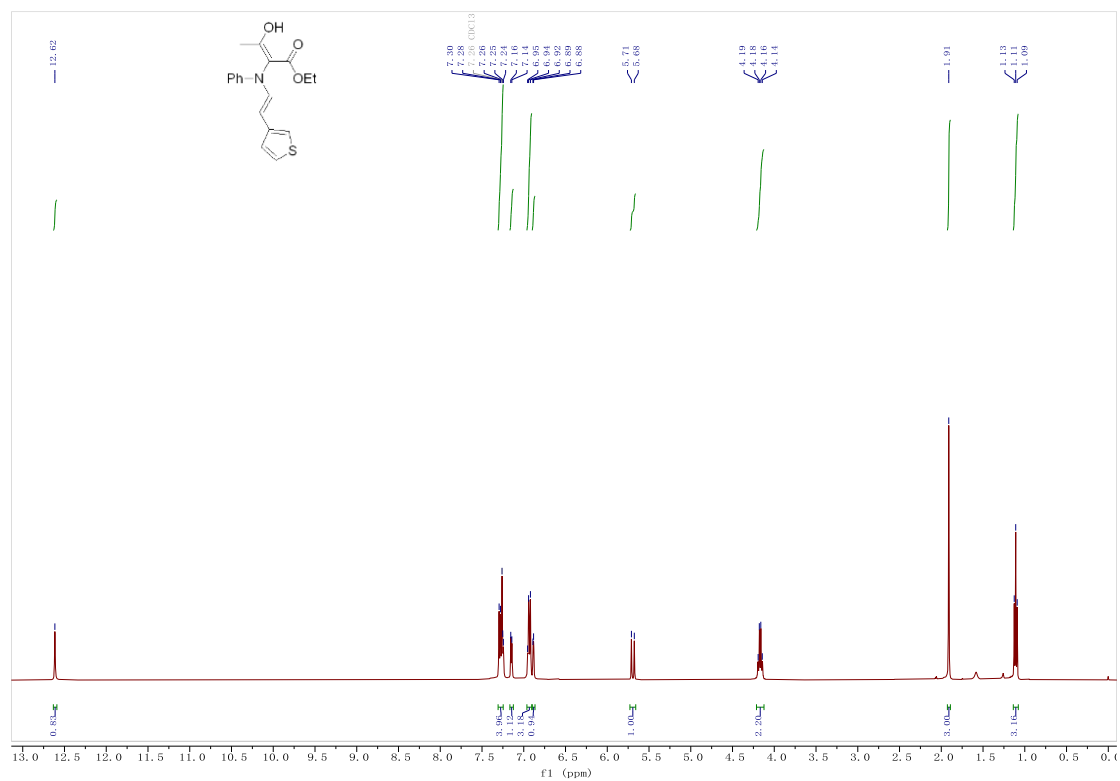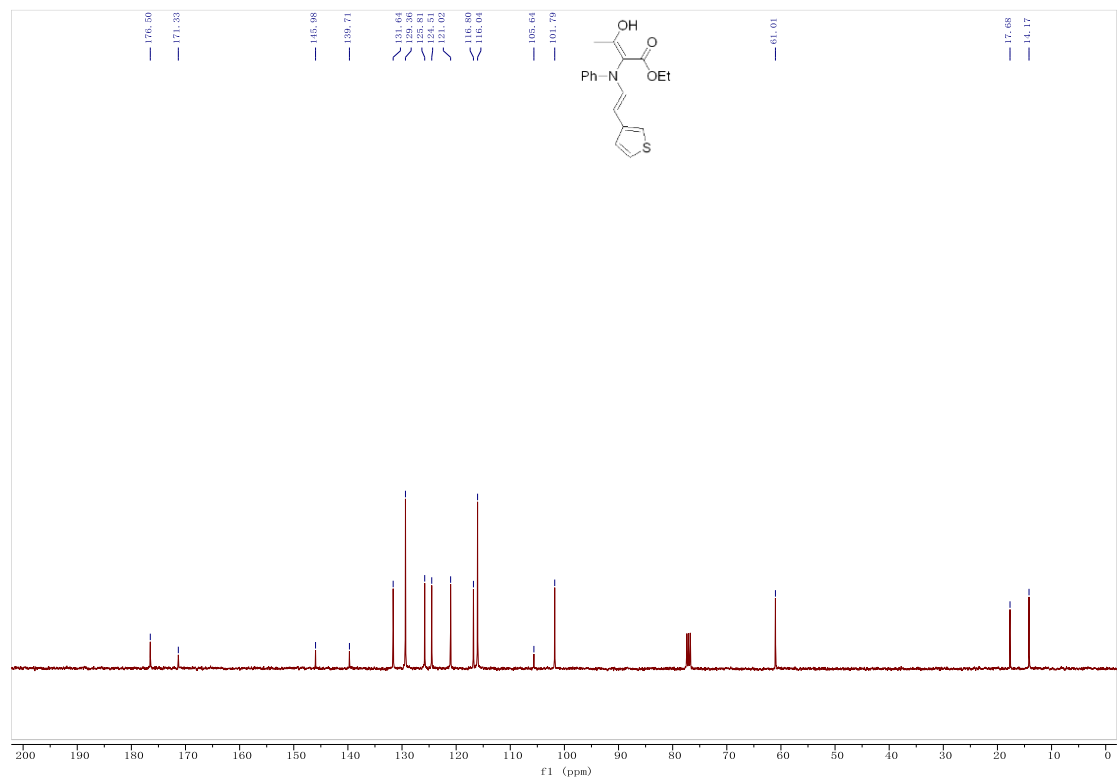

3ba

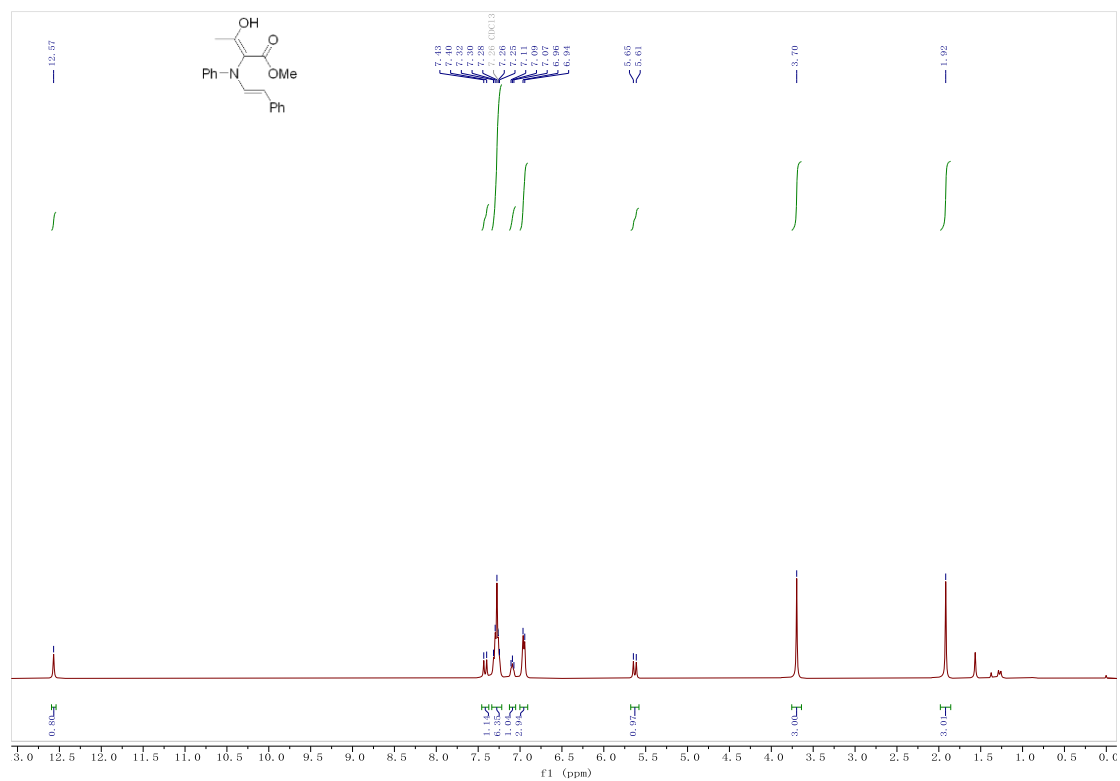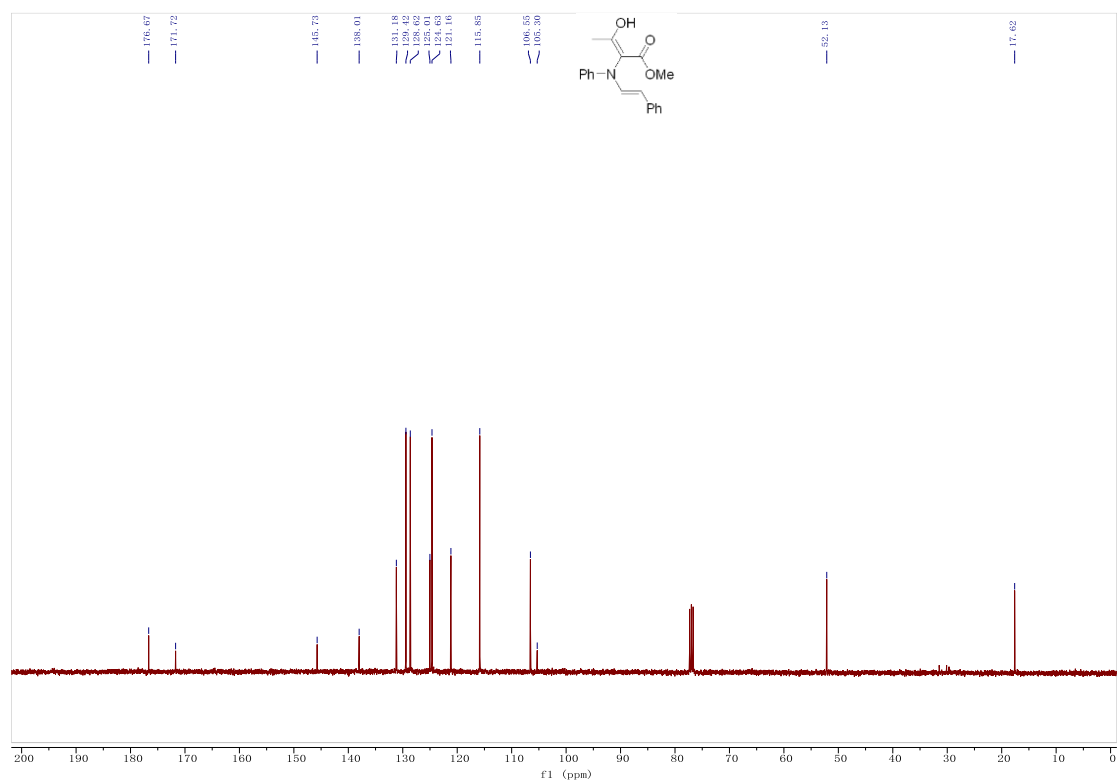

3ca

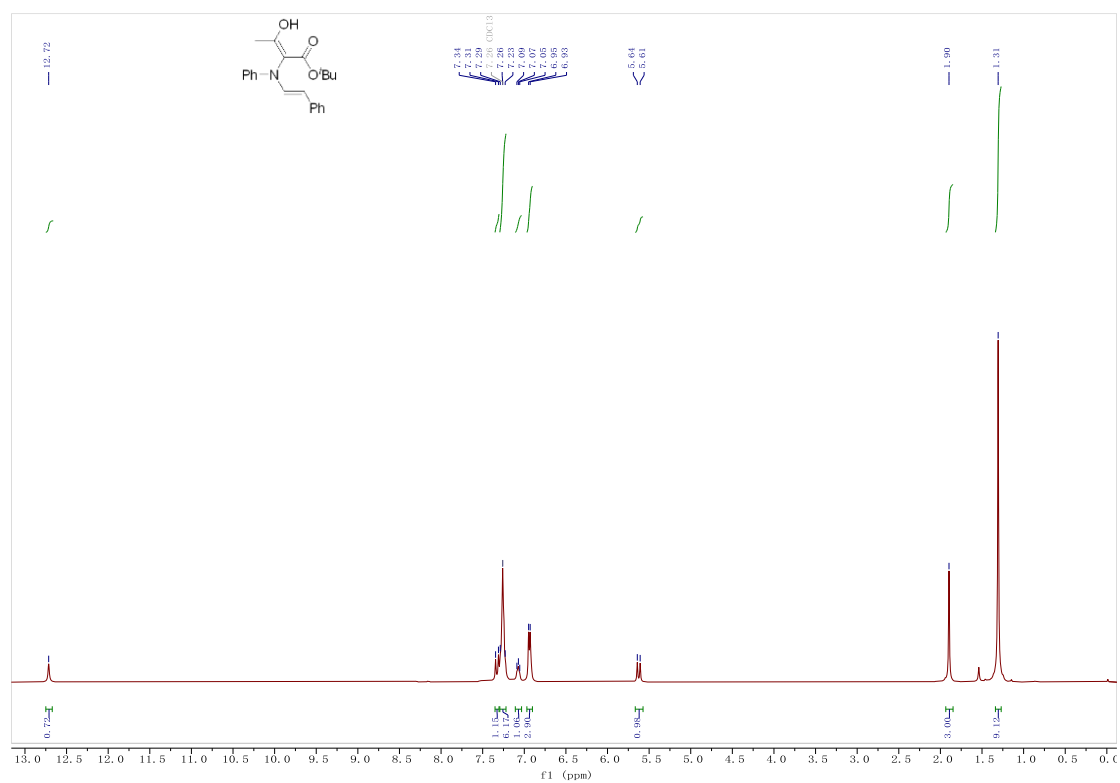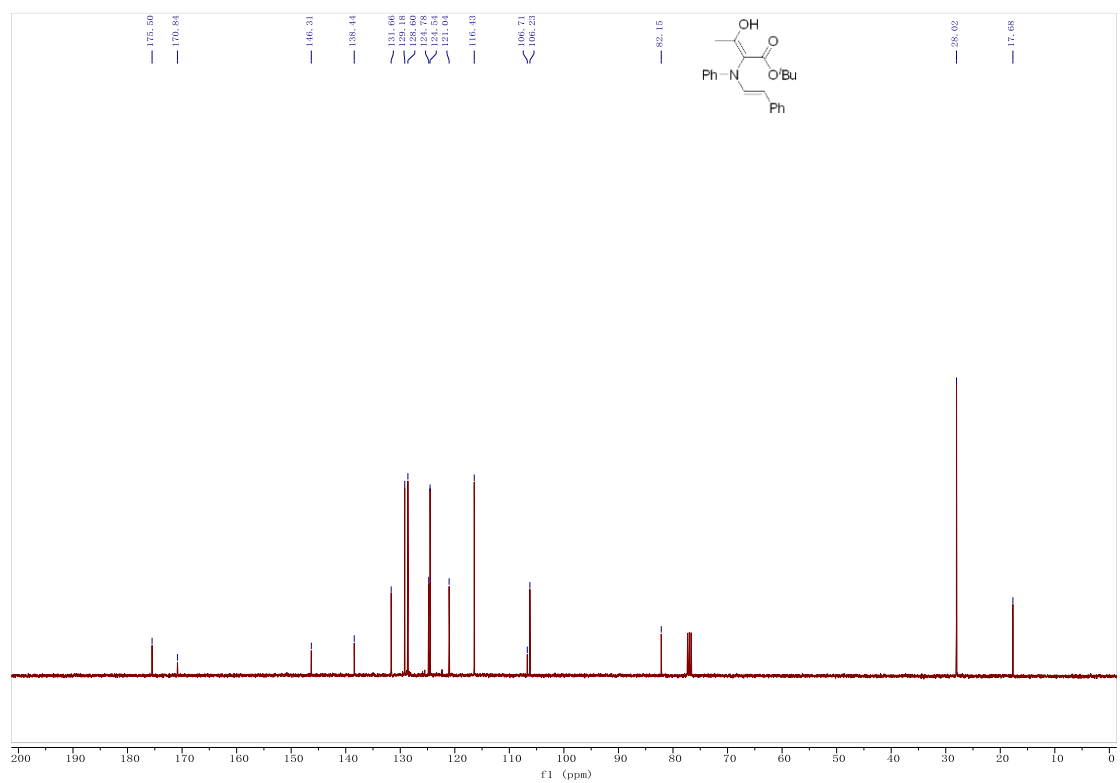

3da

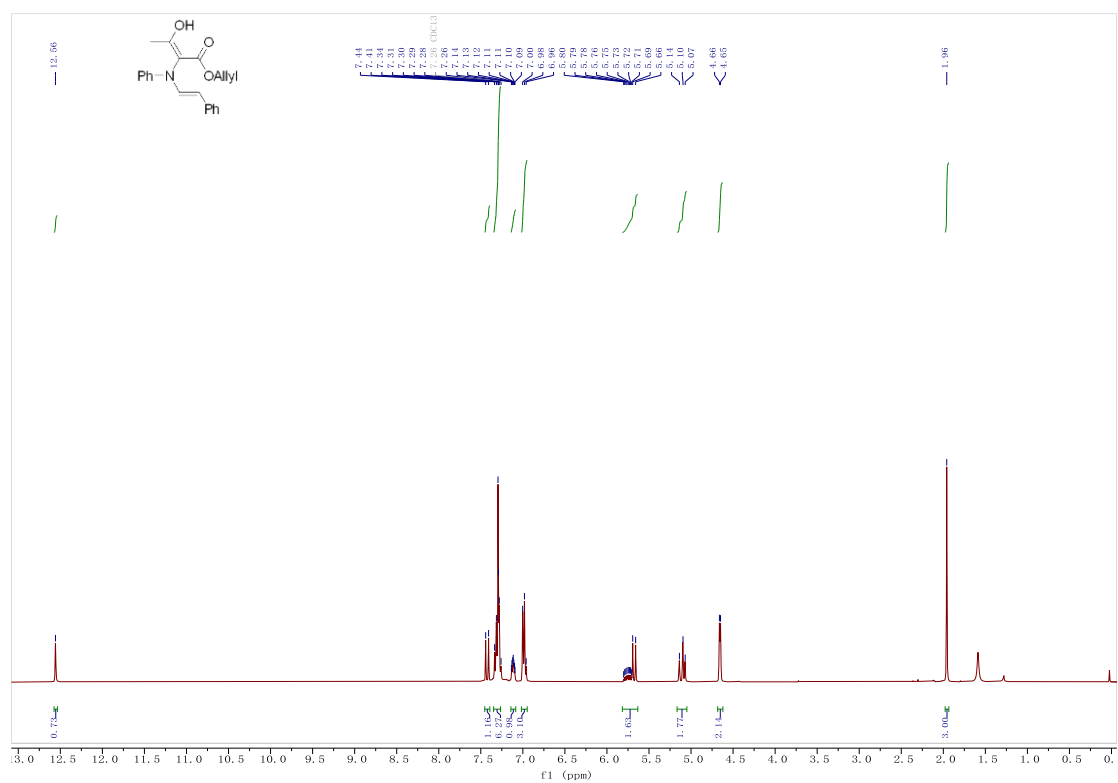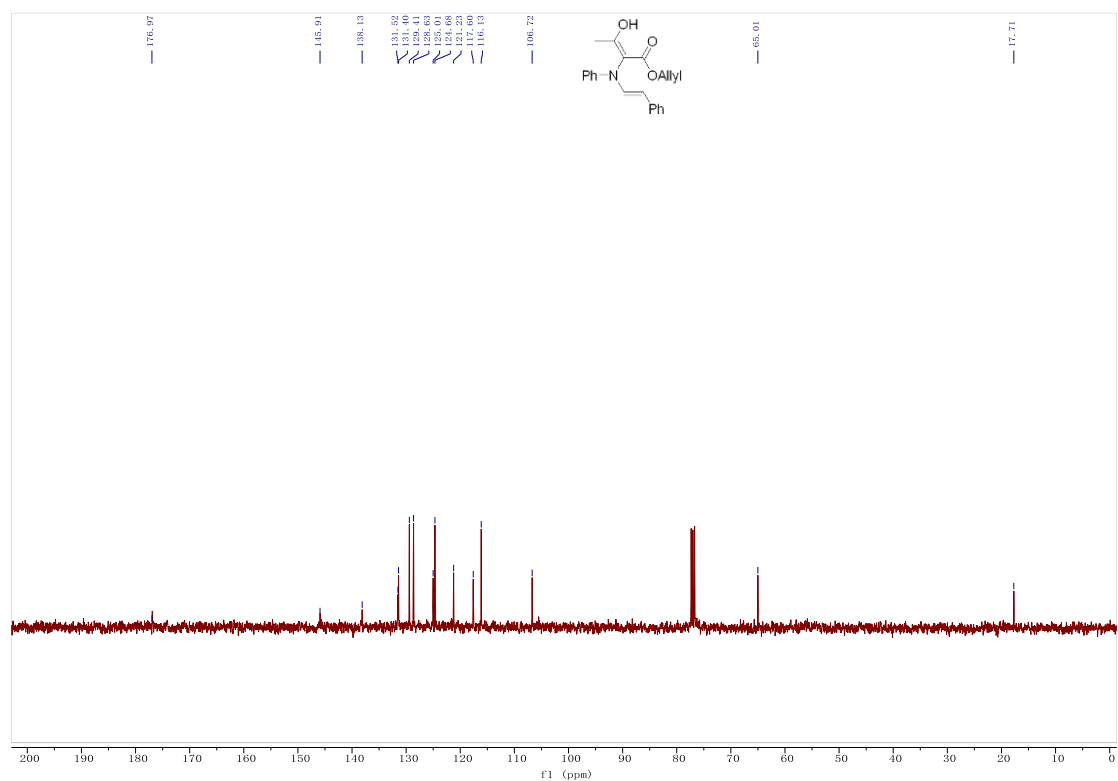

3ea

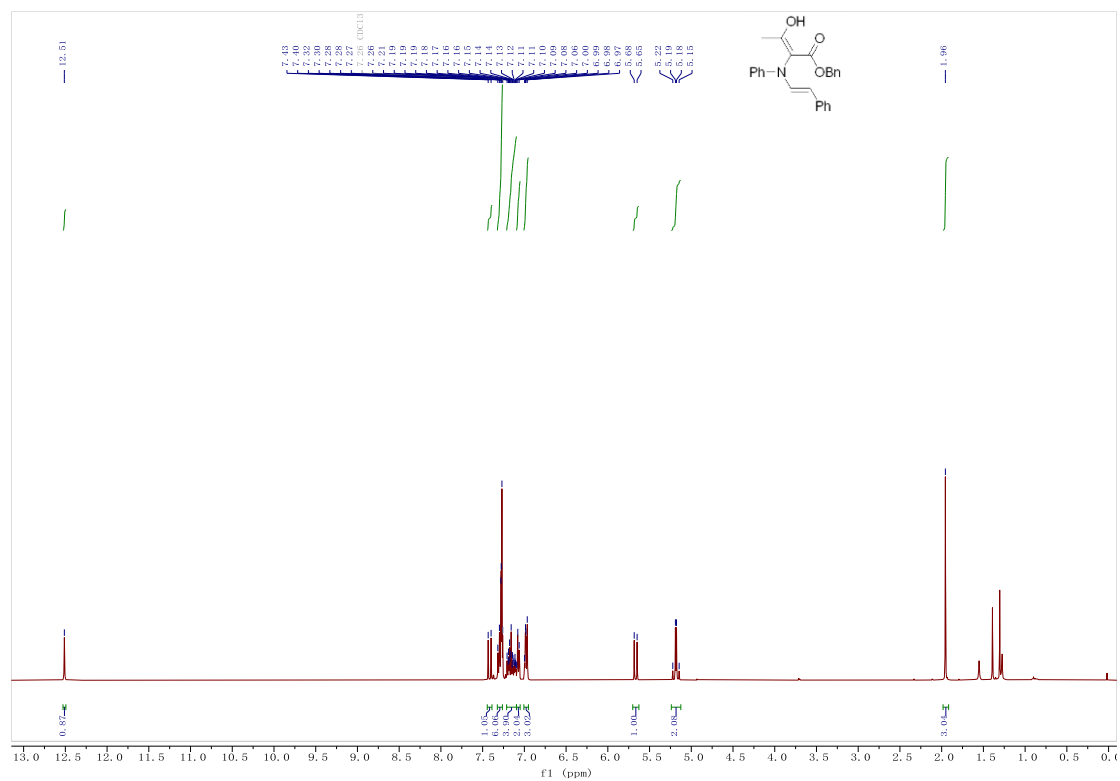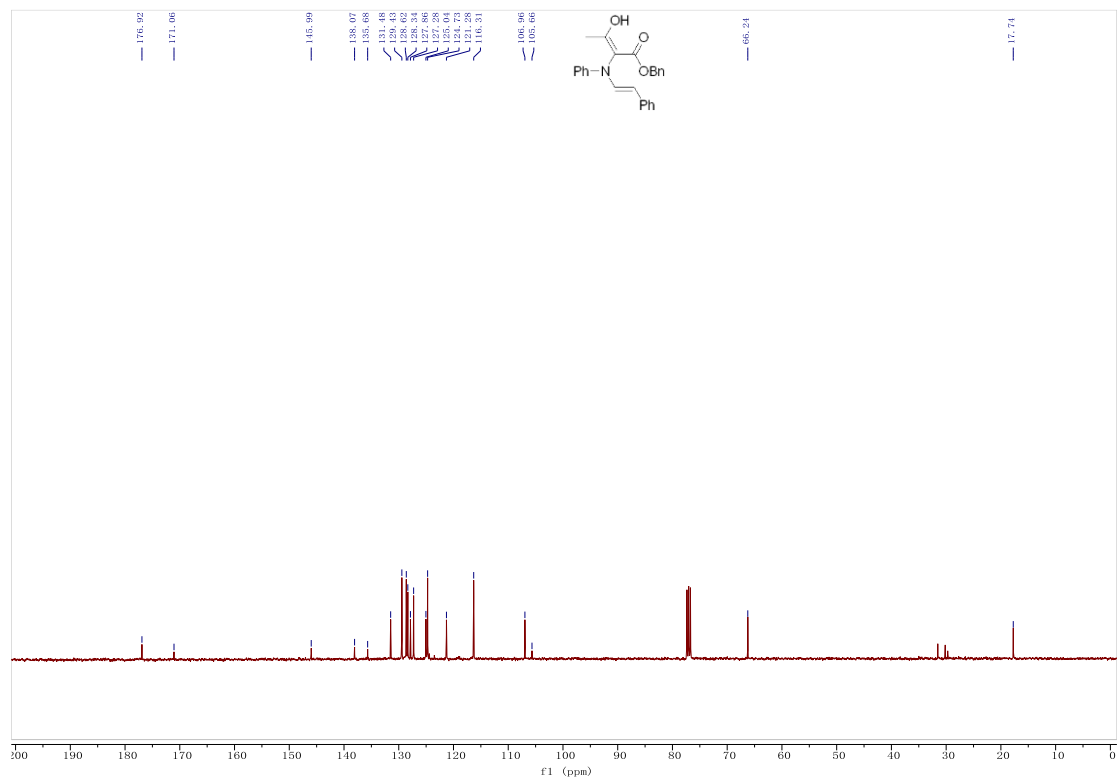

3fa

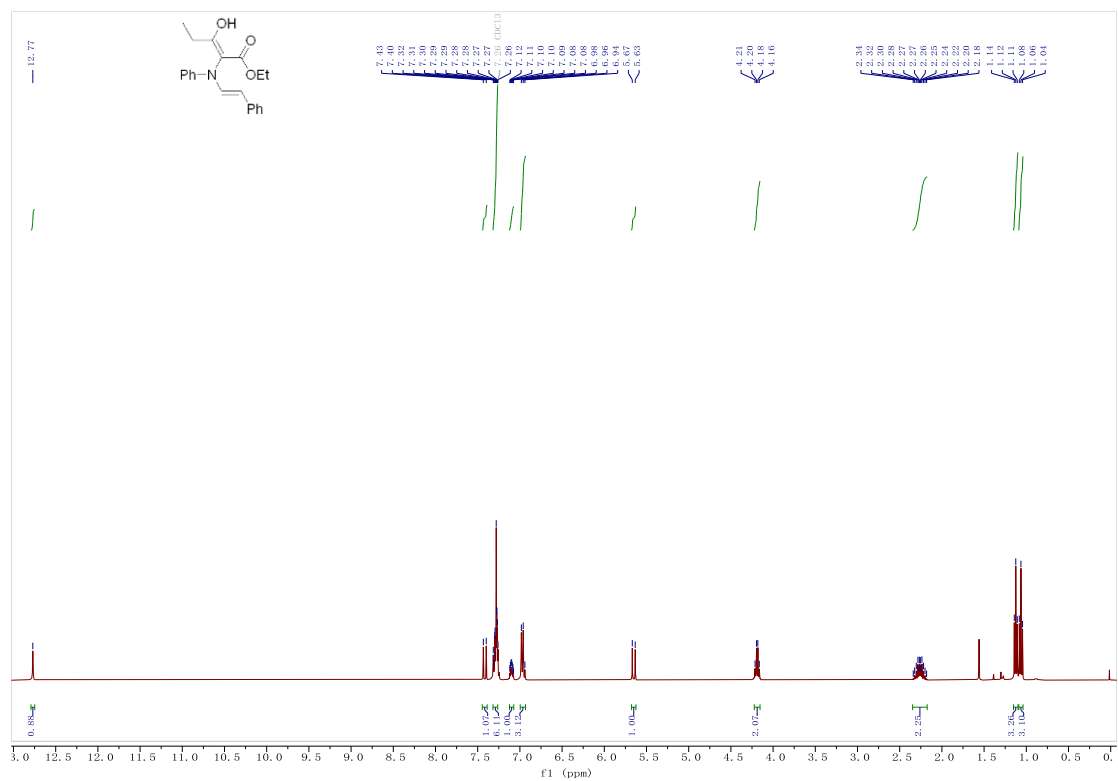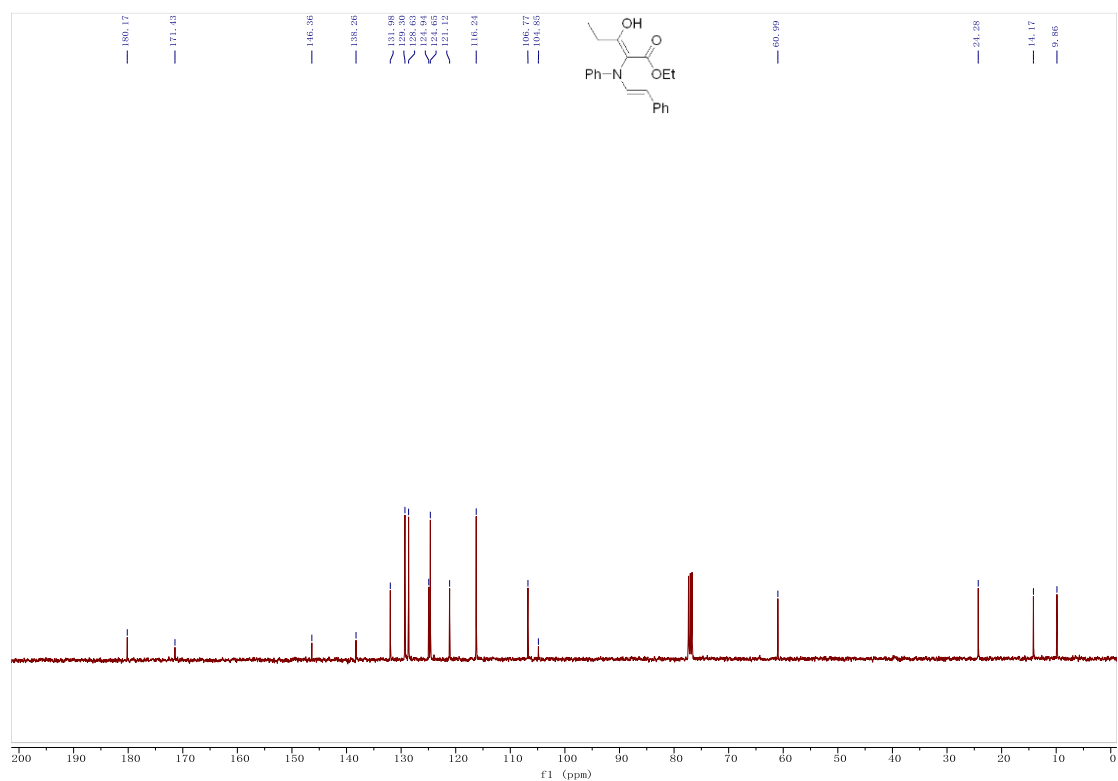



3ga

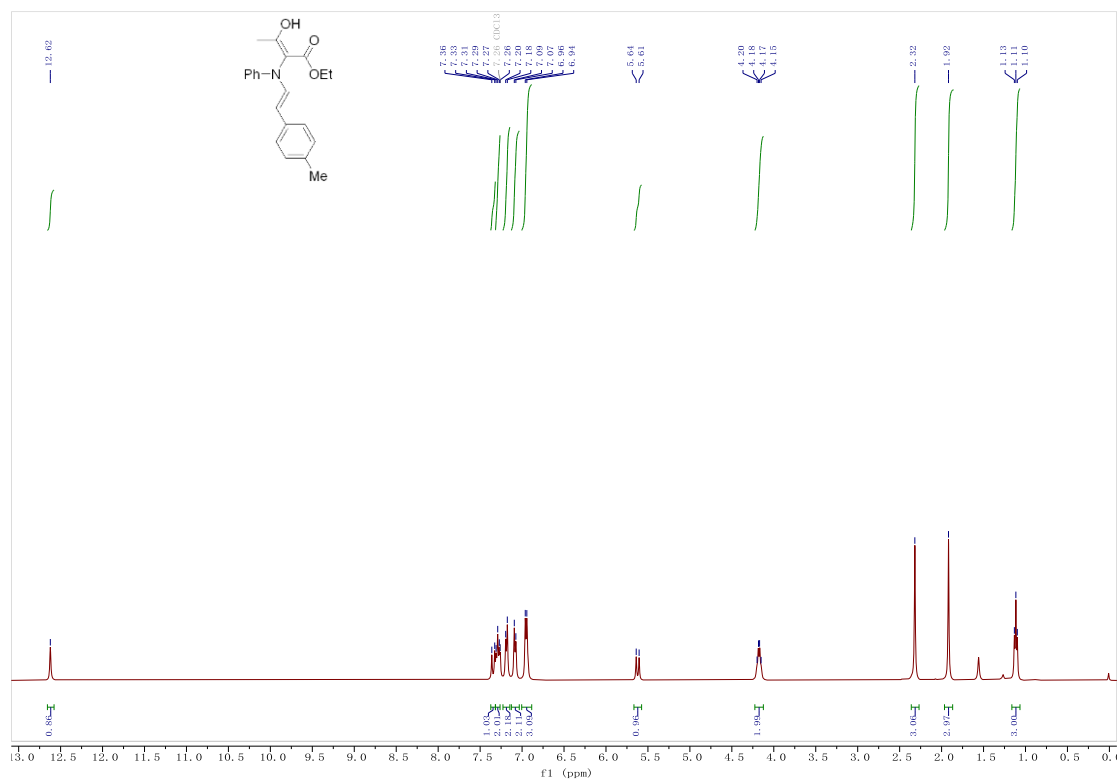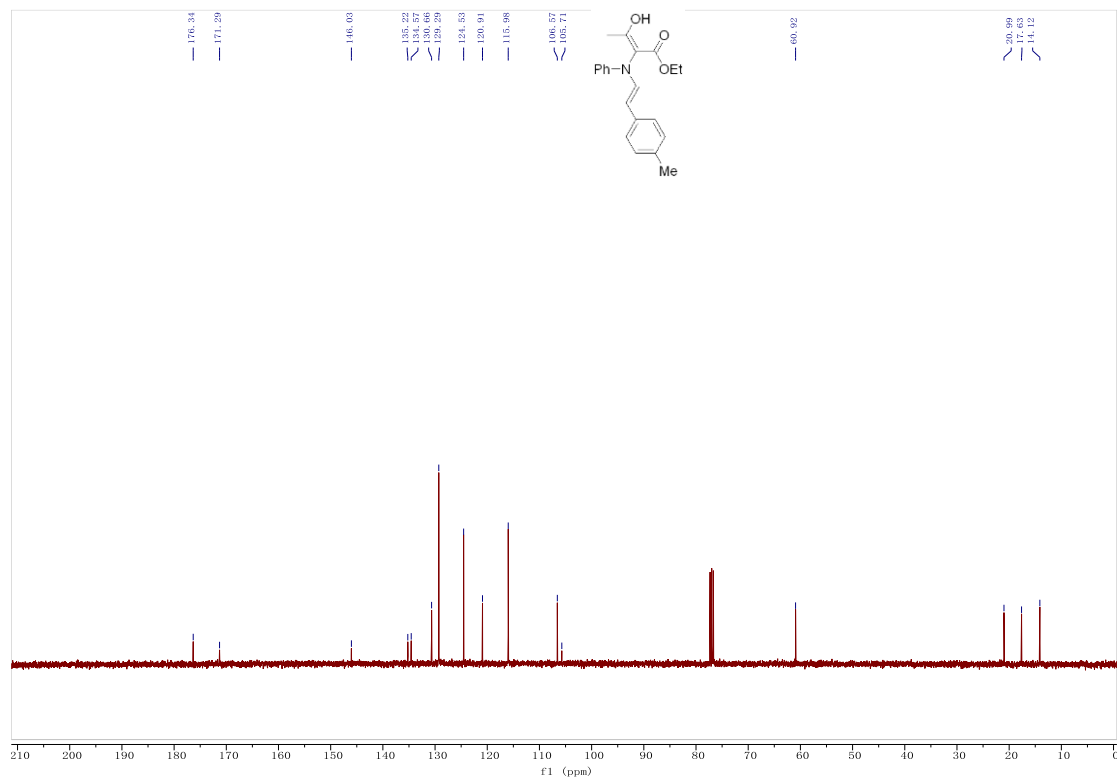

3ha

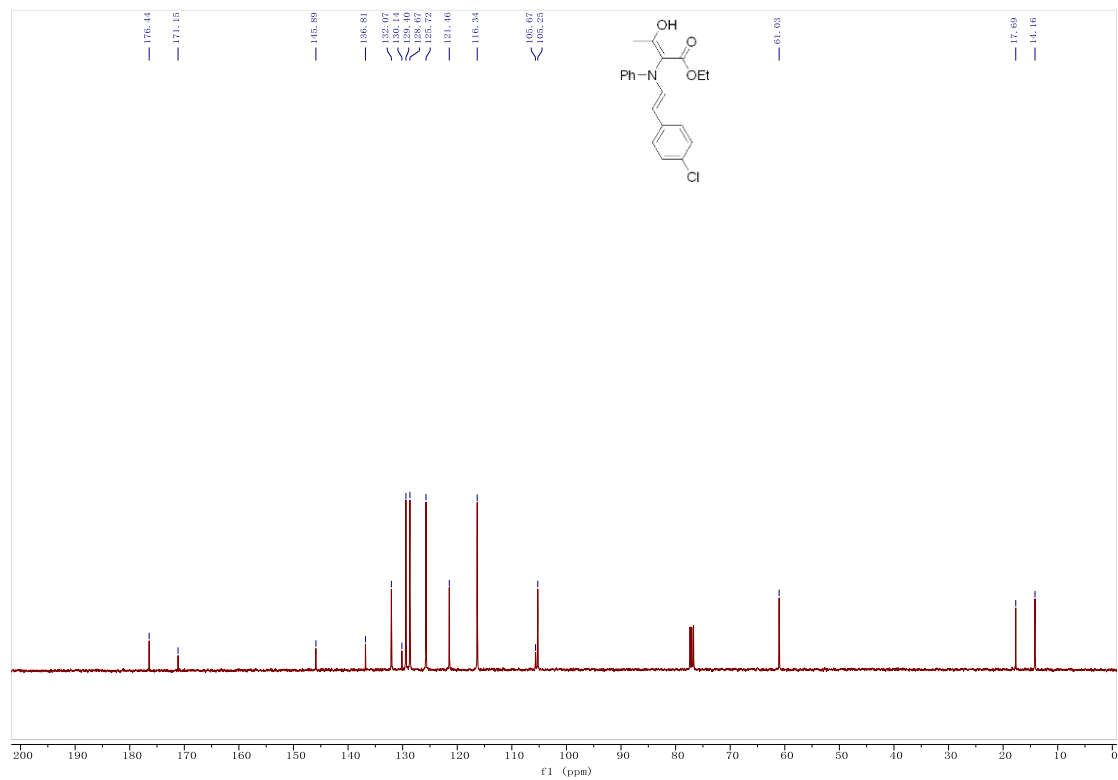

3ia



3ja

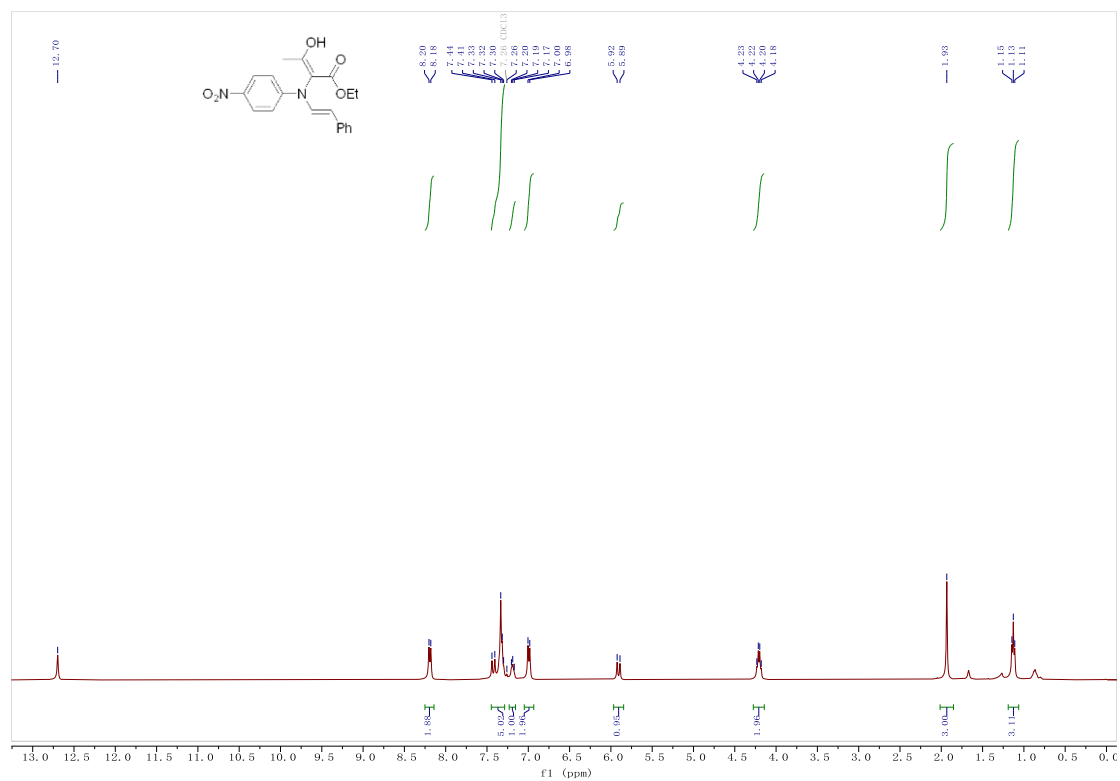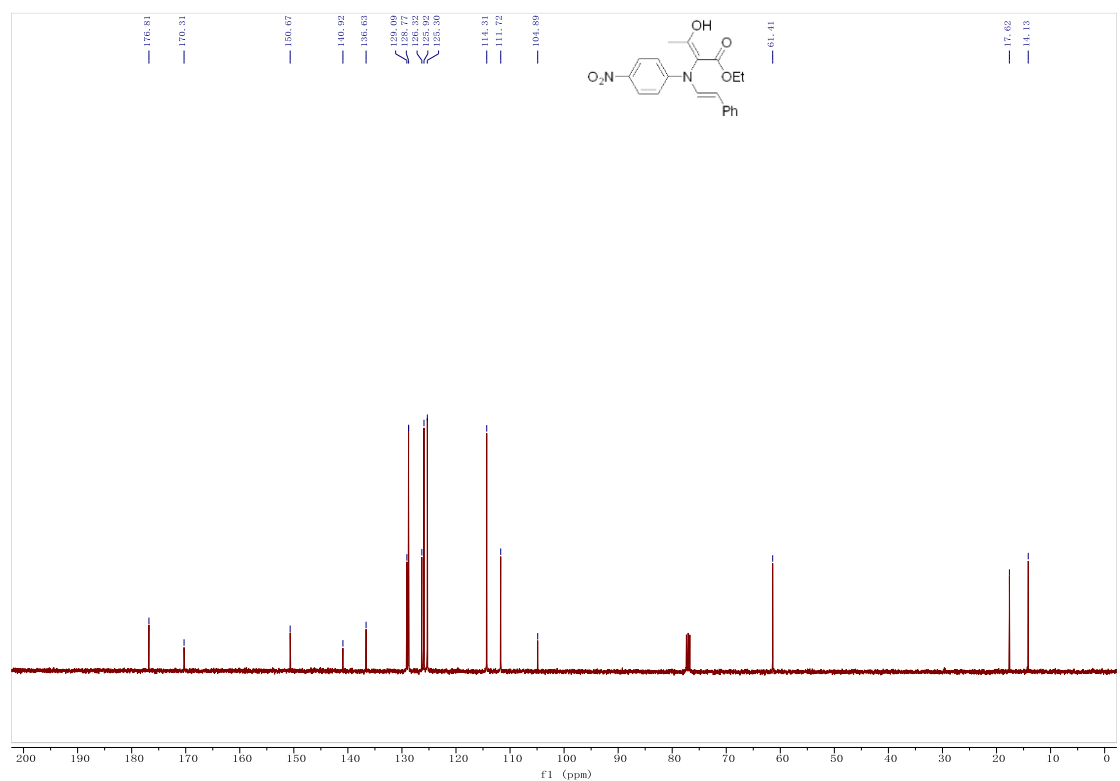

3ka

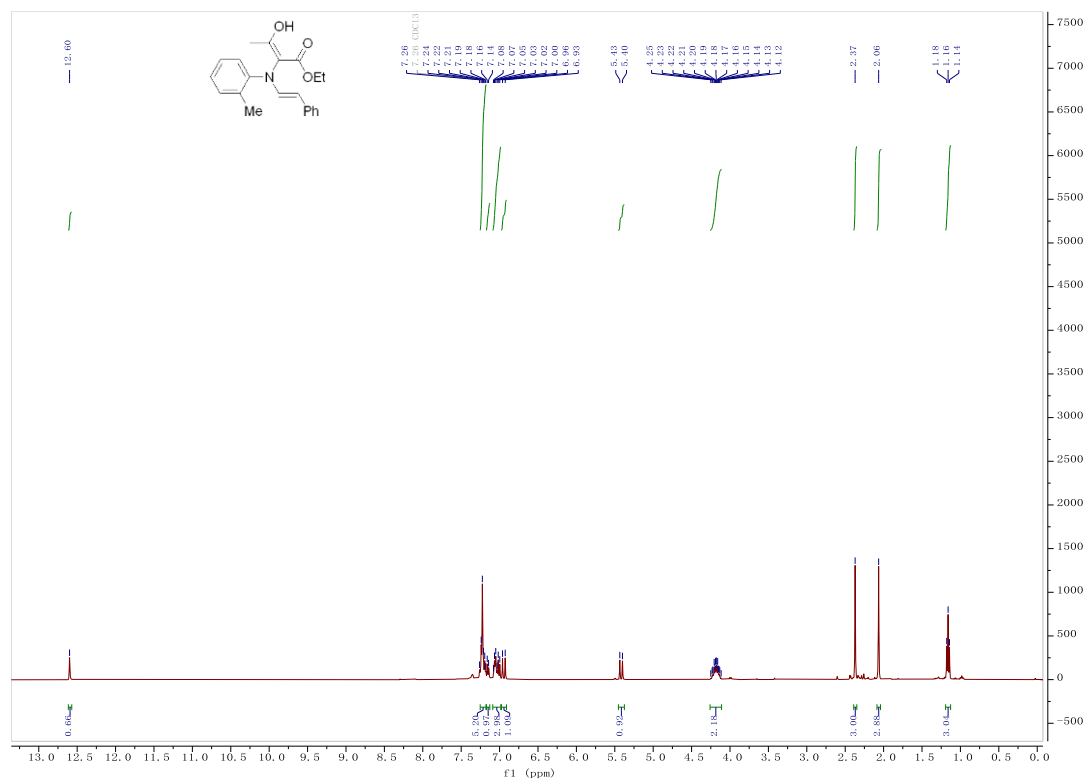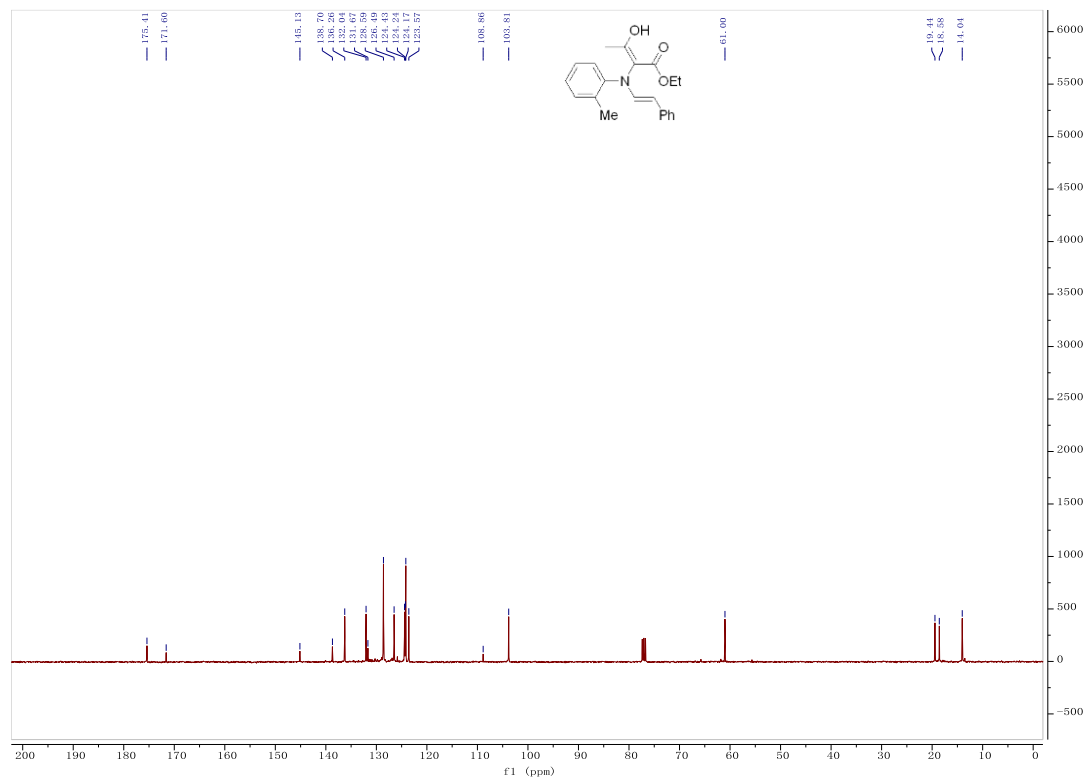

3la

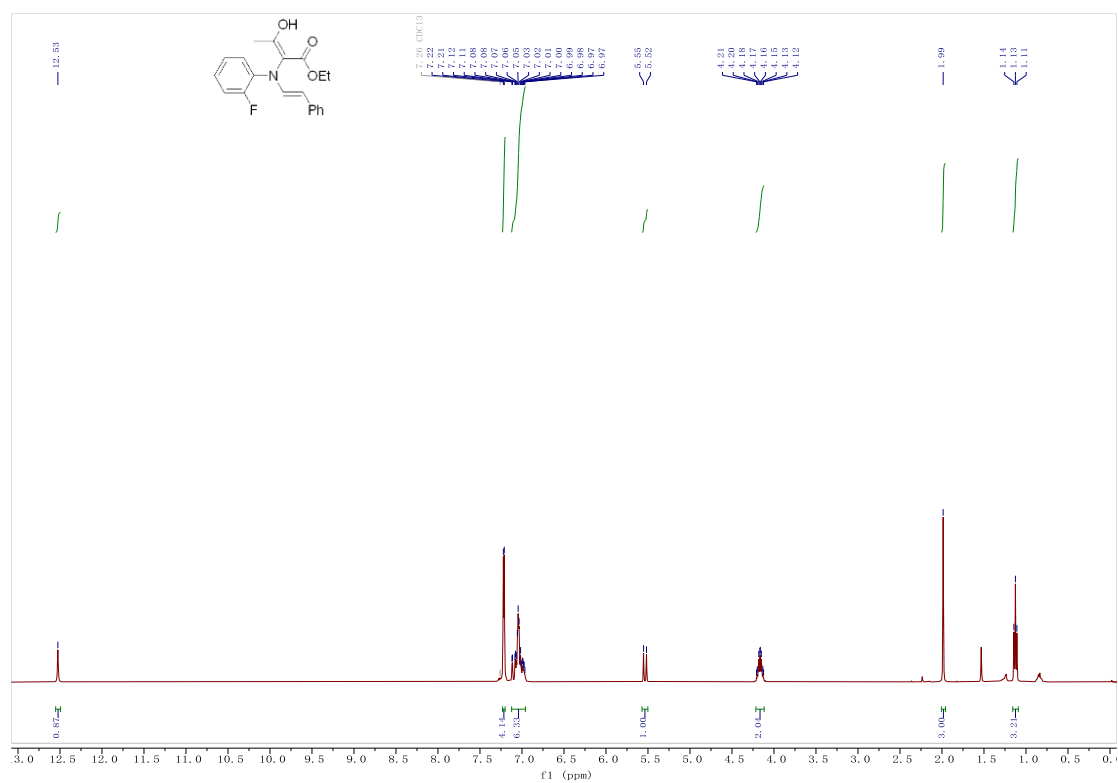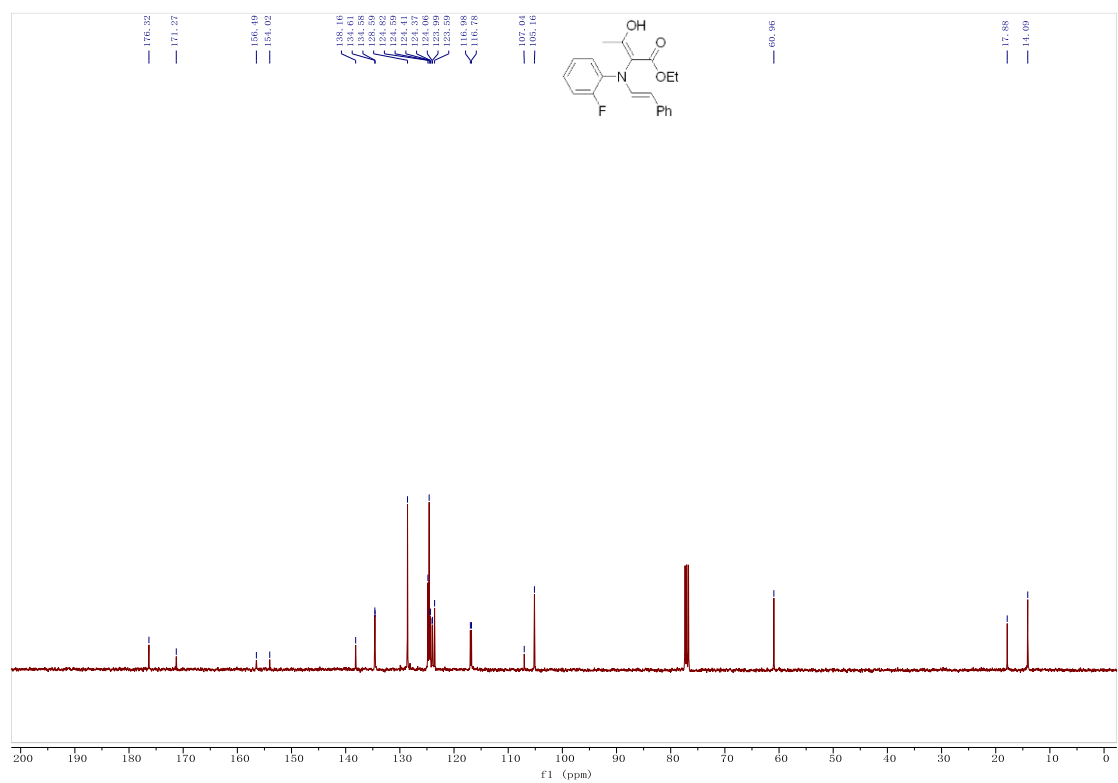

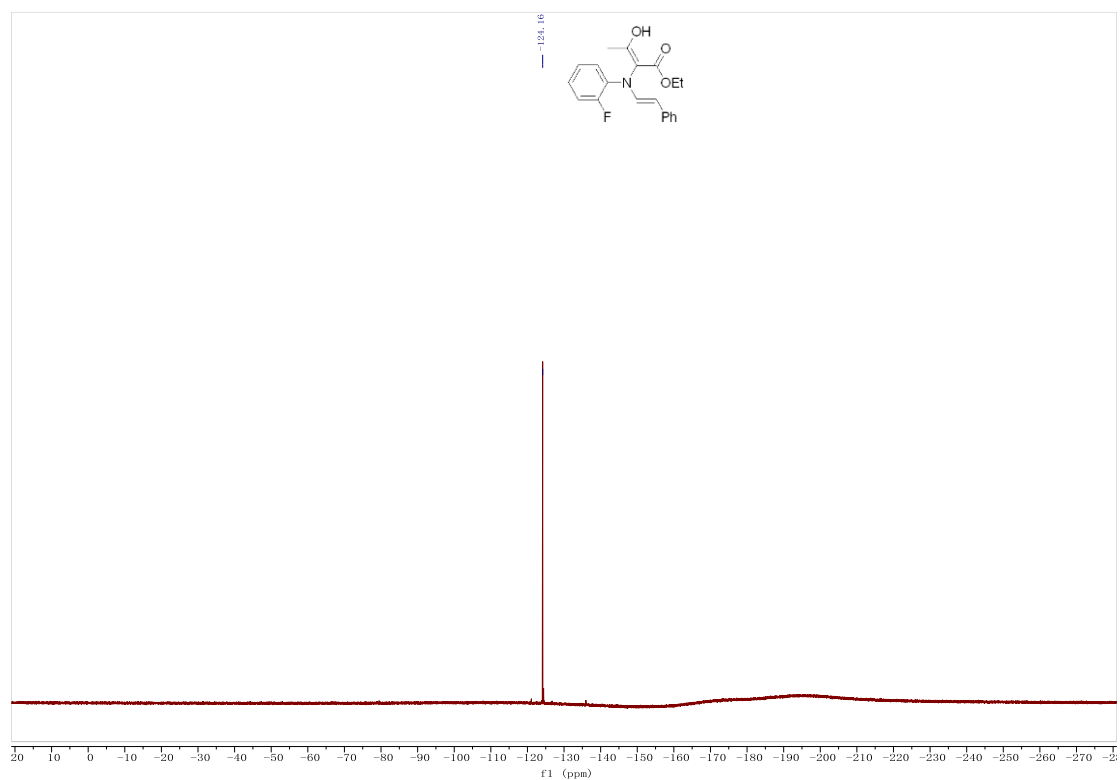

### 3ma

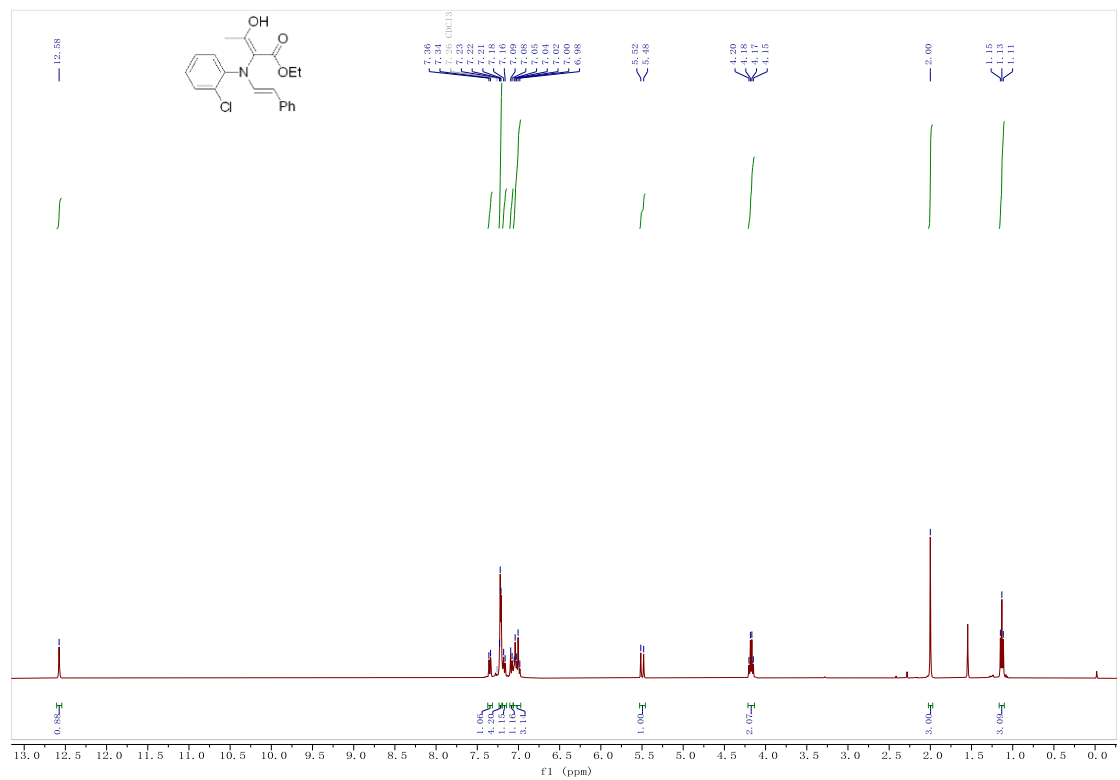





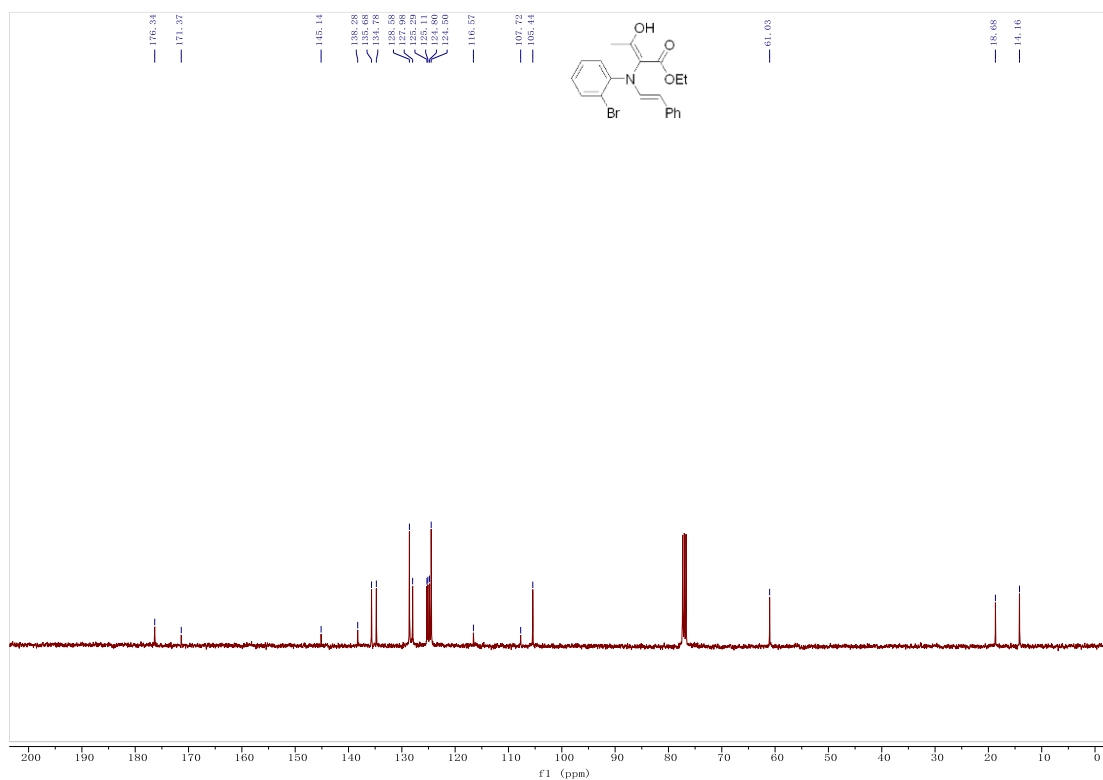

### 30a

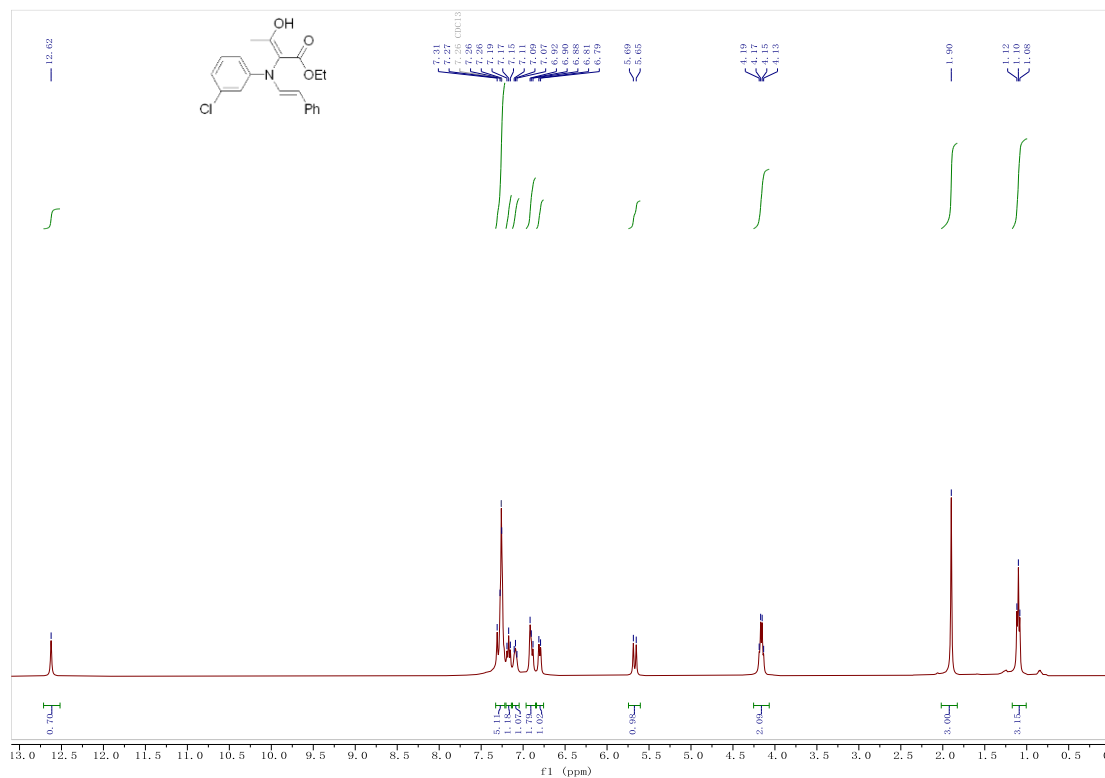

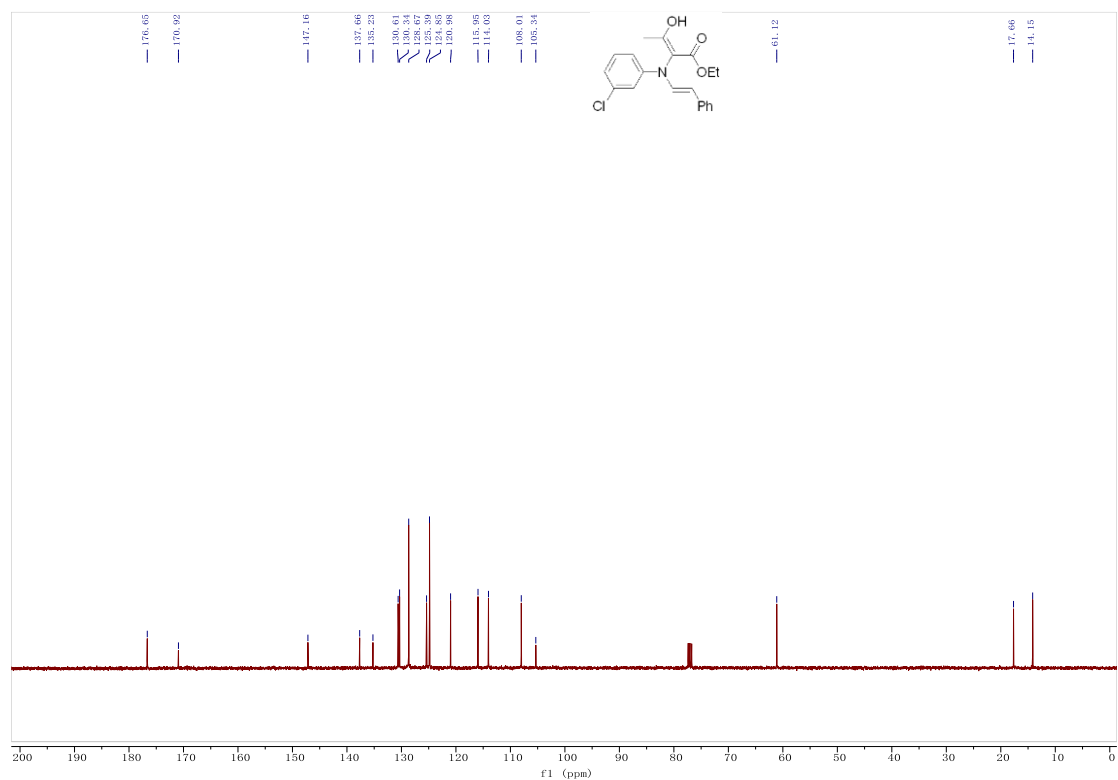

### 3pa

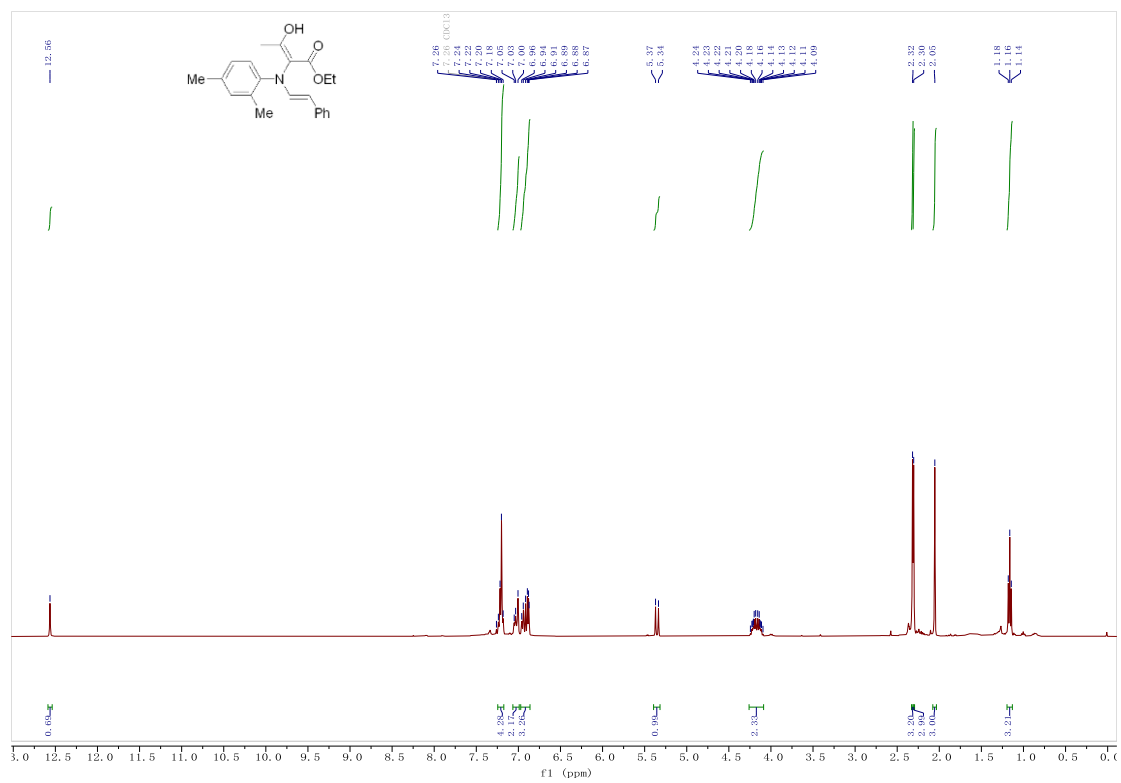

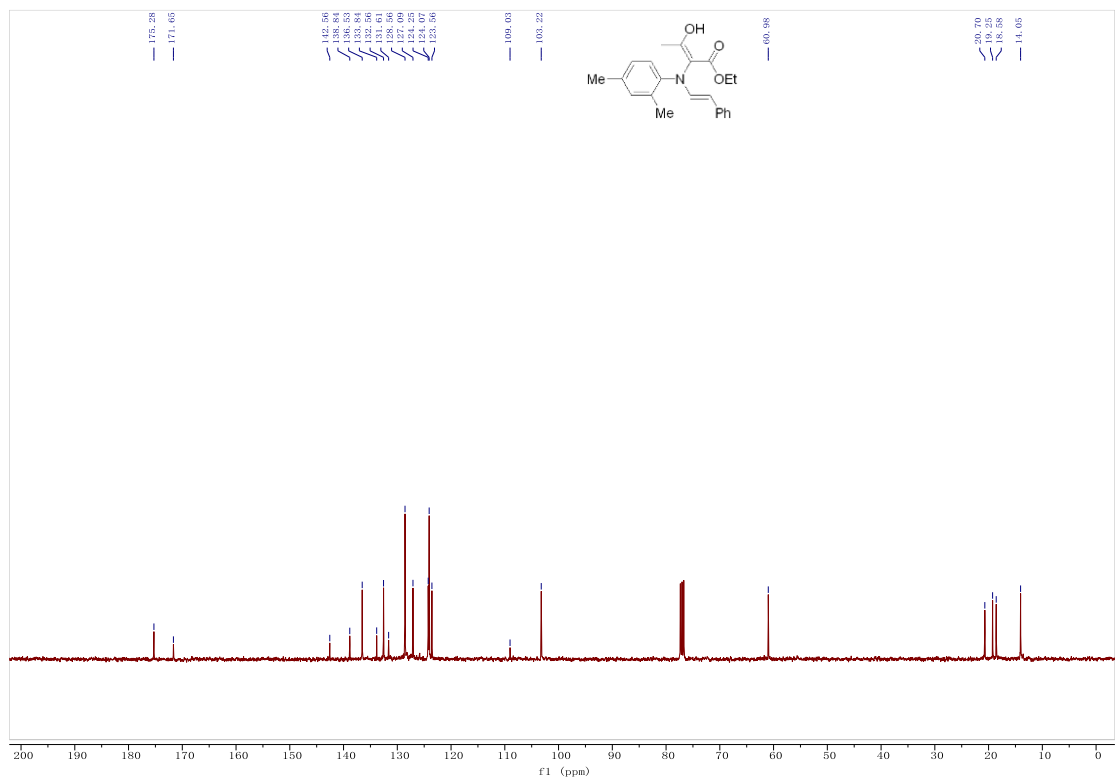

**4aa**

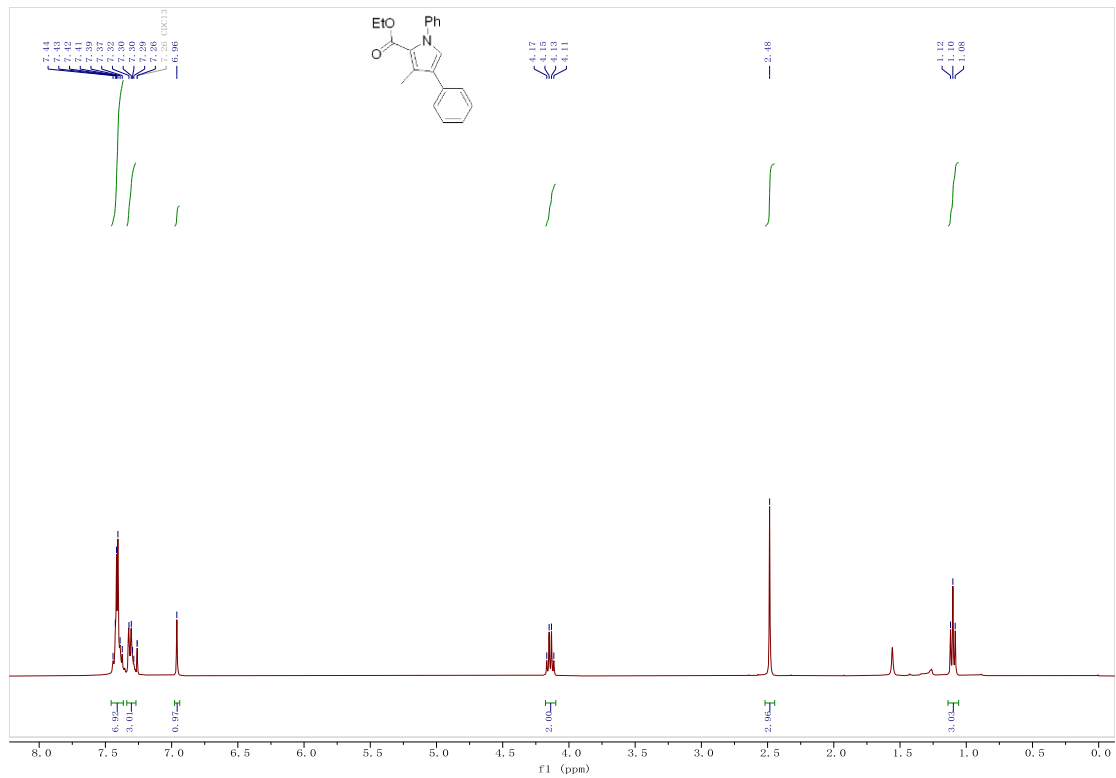

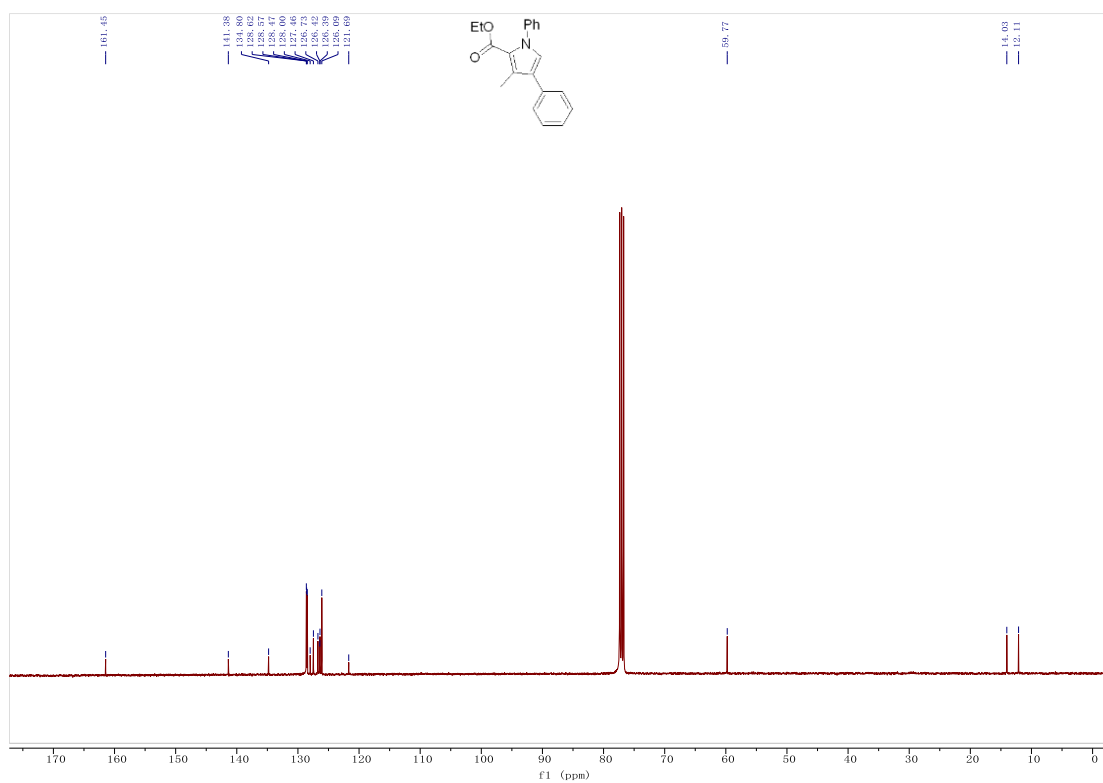

**4ab**

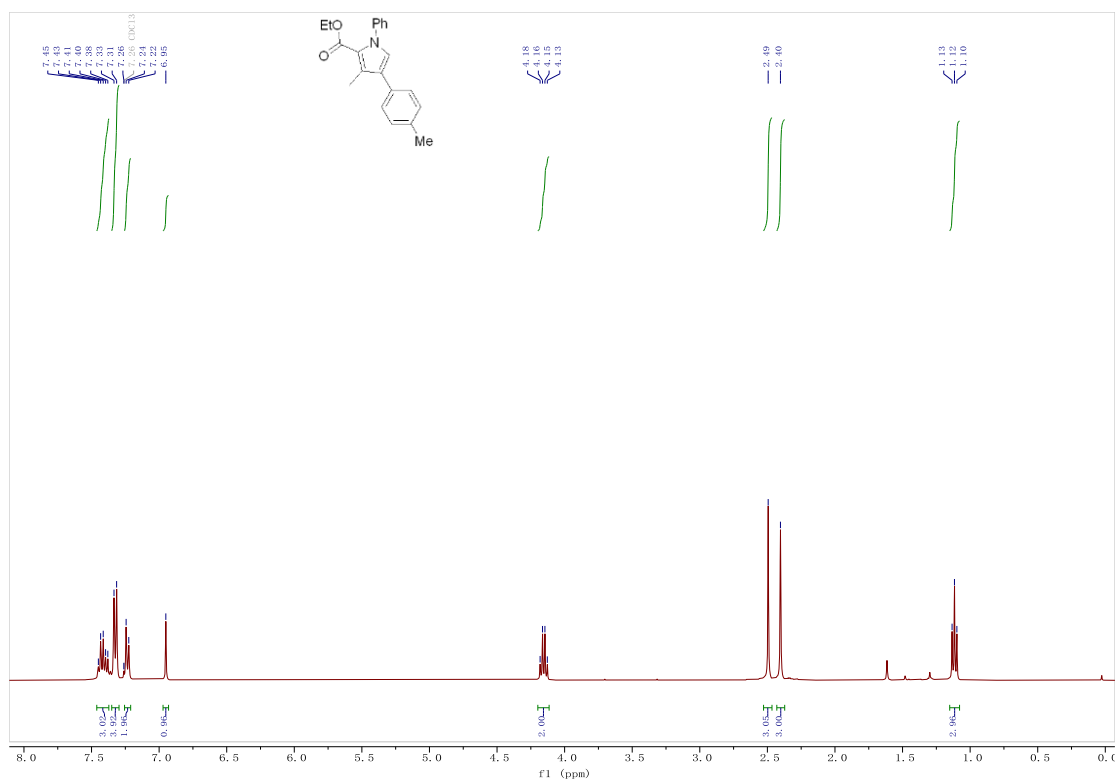

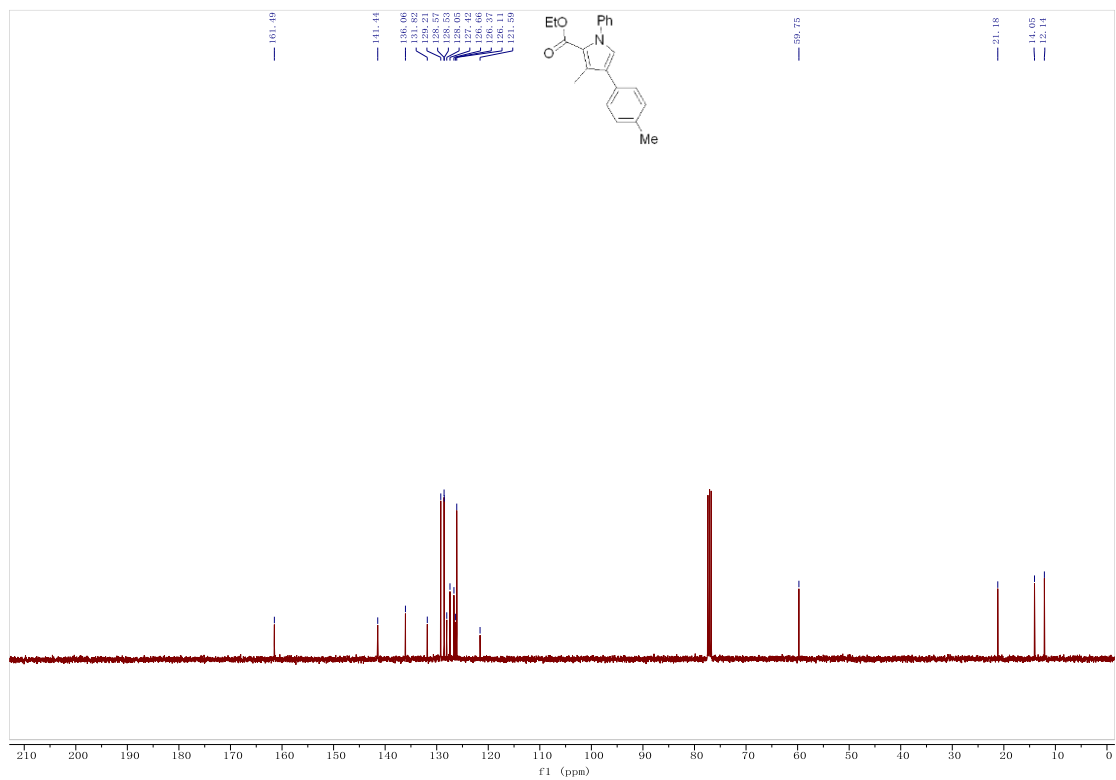

4ac

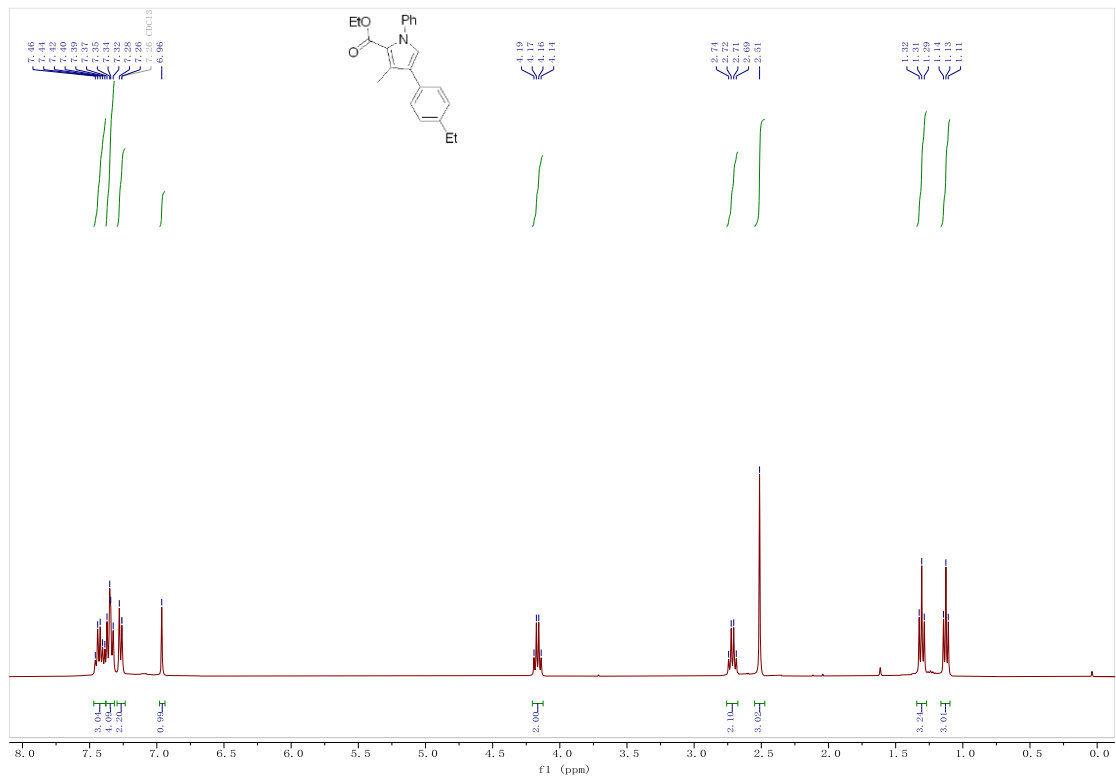

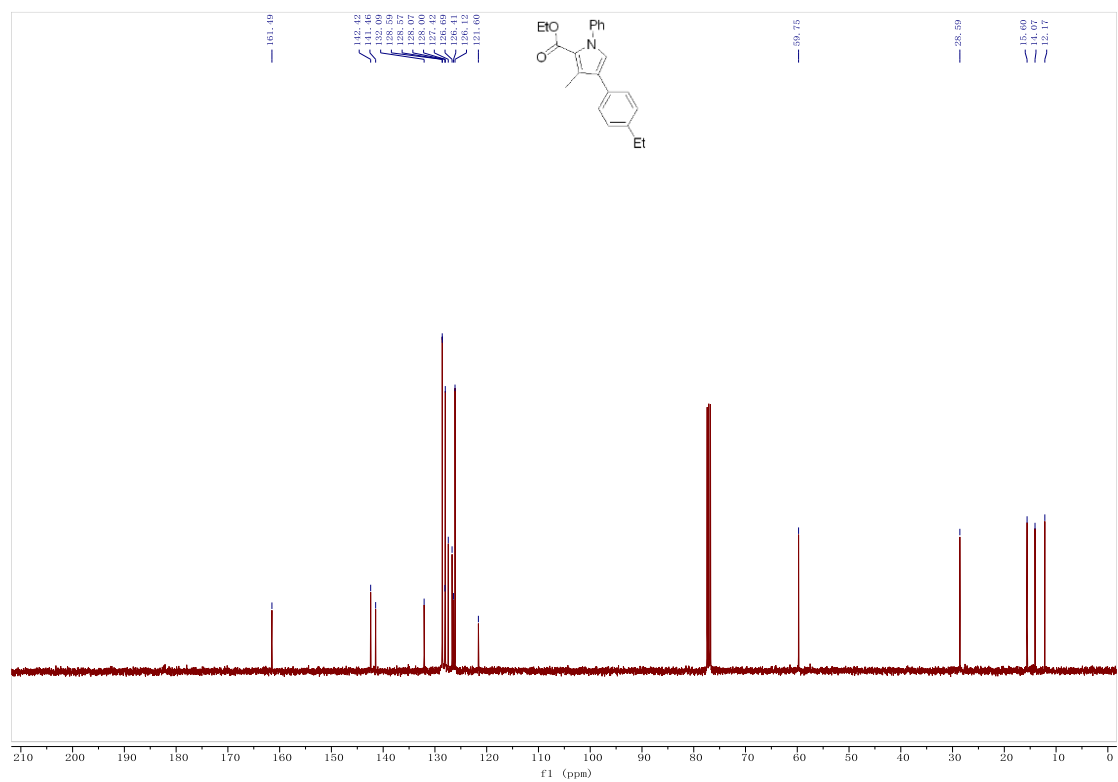

**4ad**

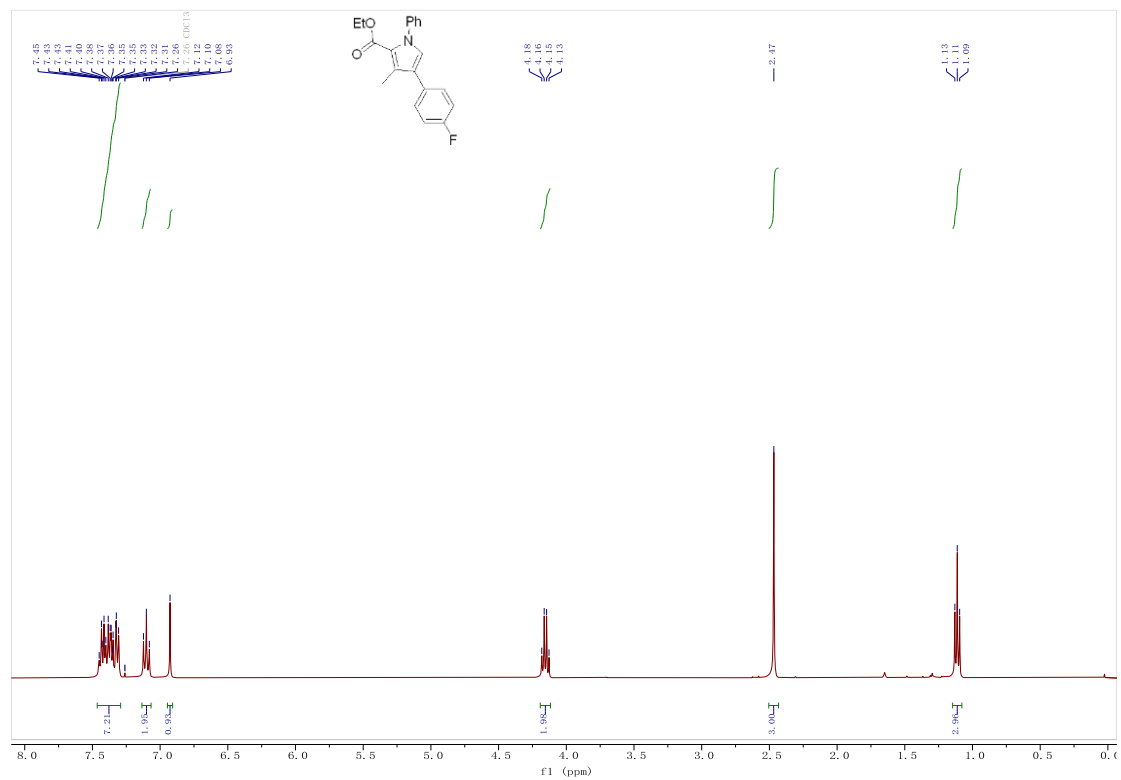

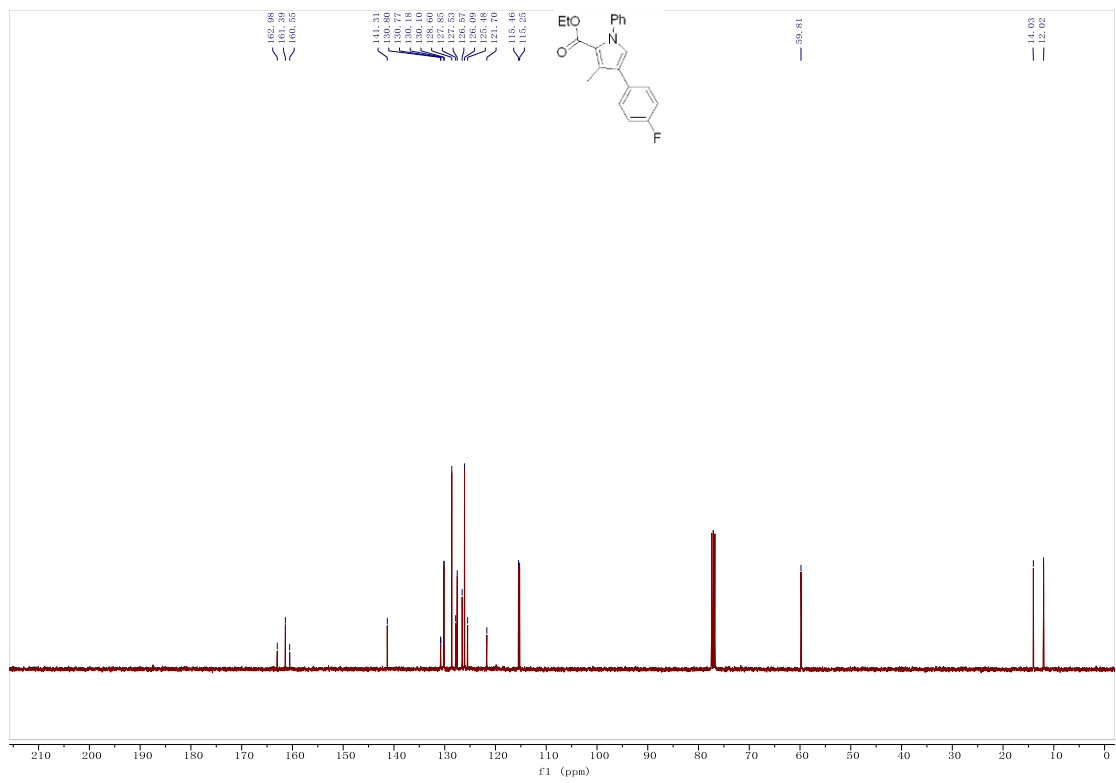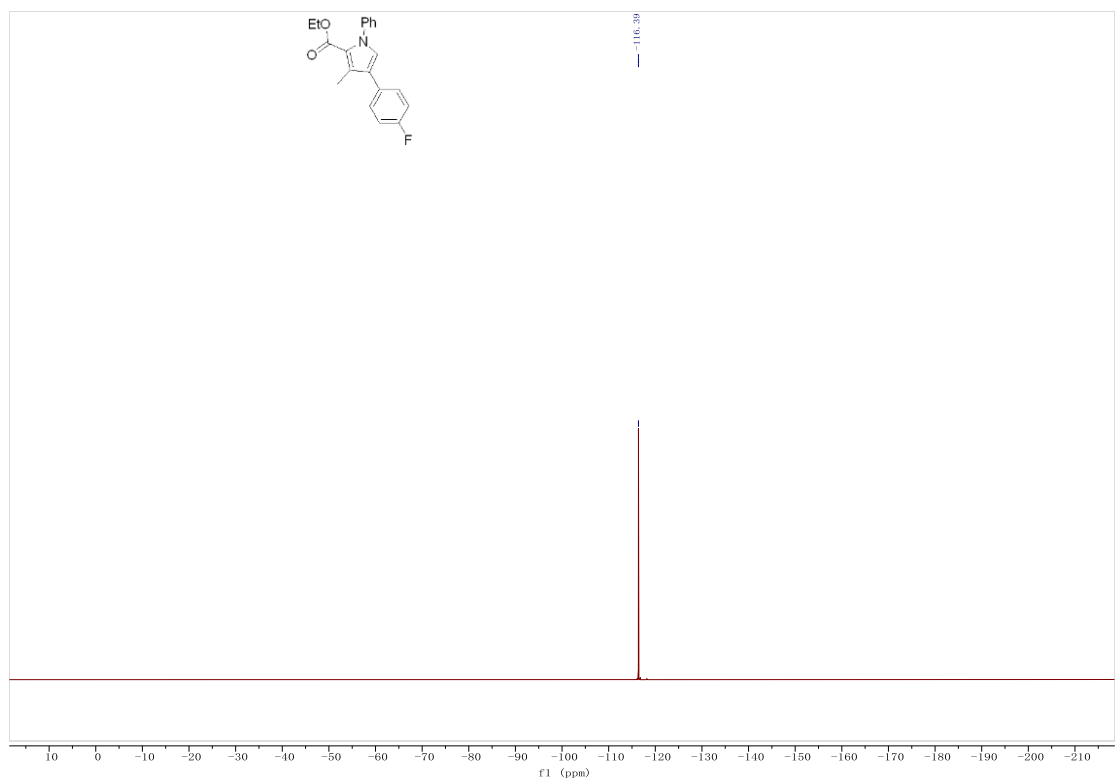

4ae

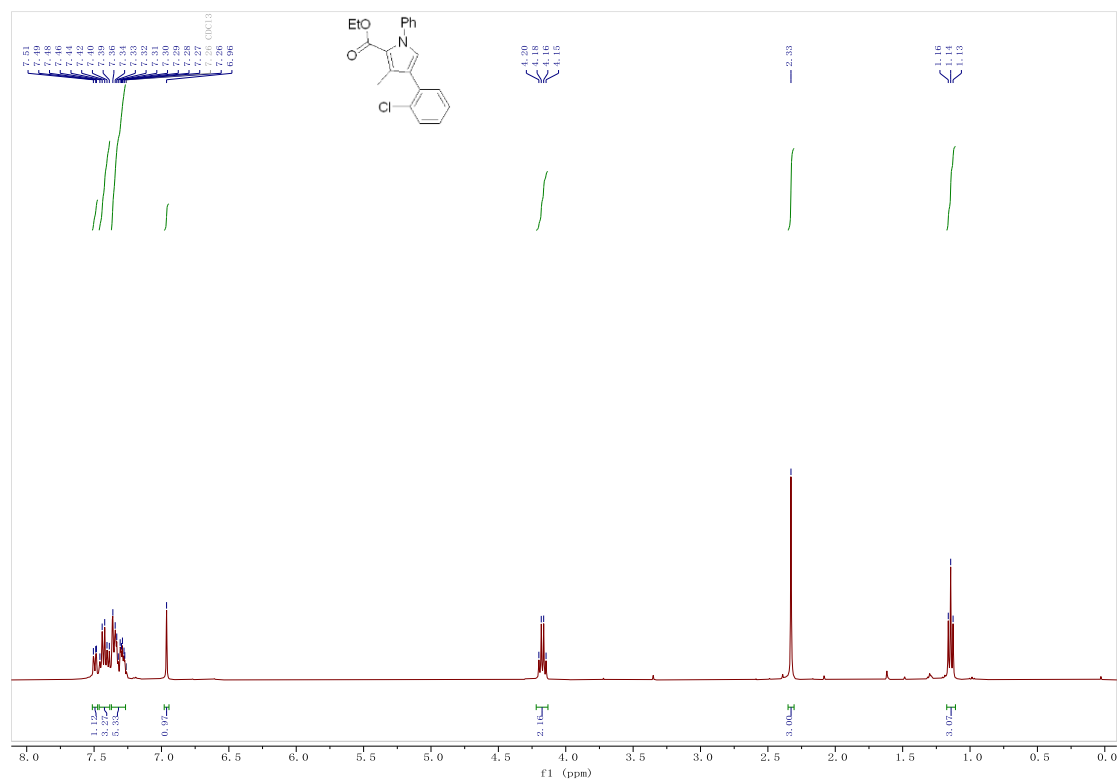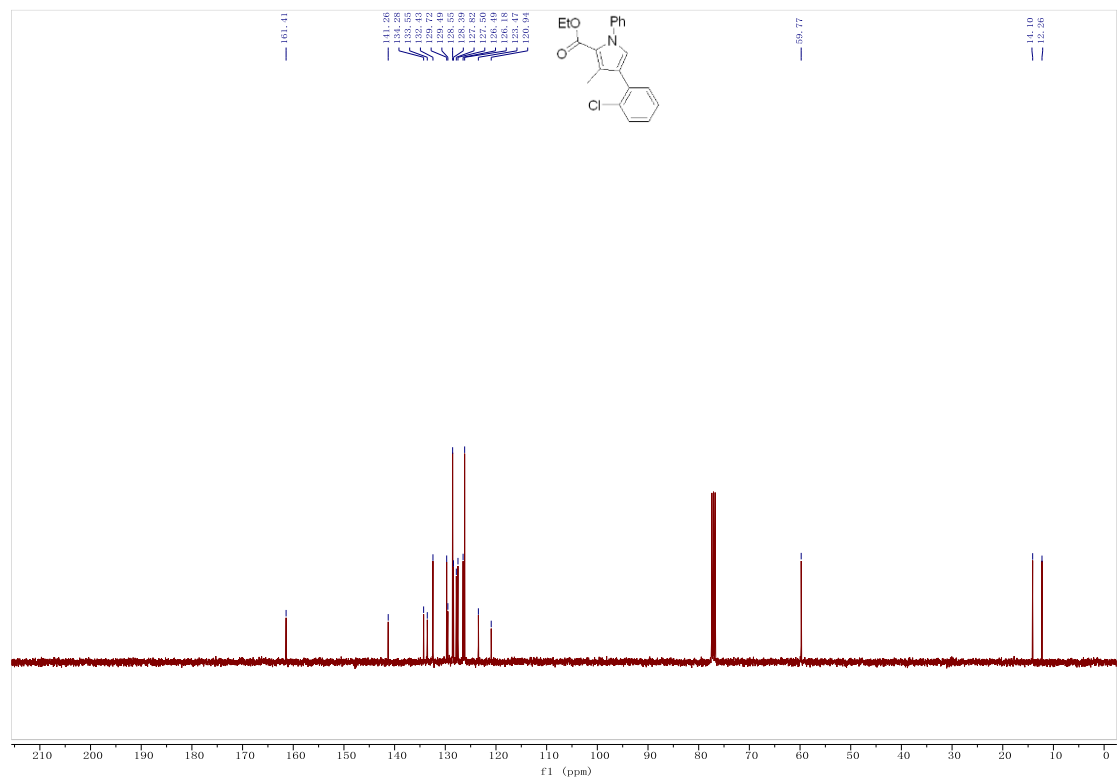



4af

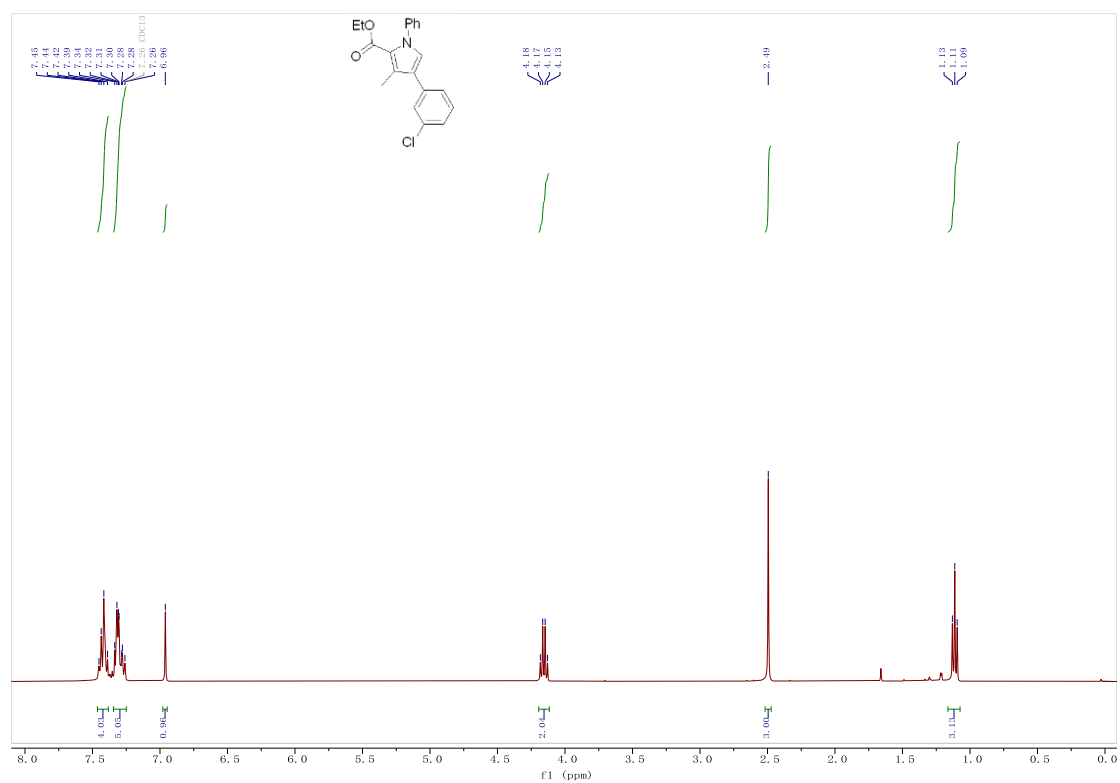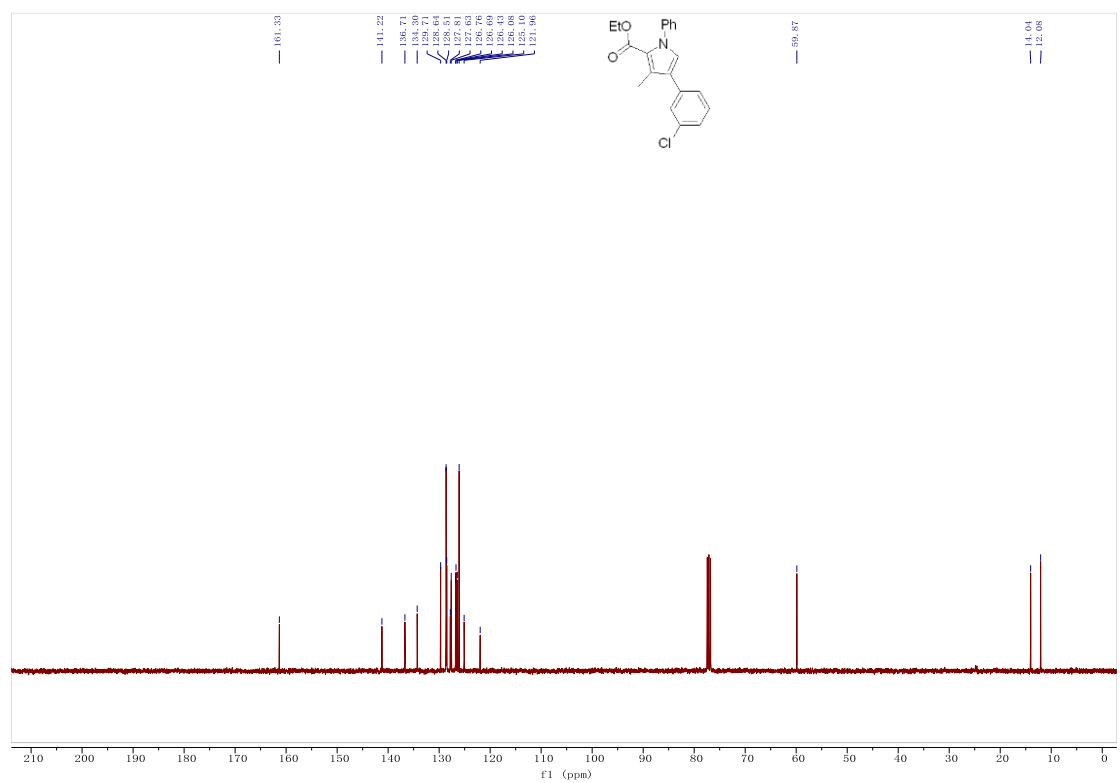

4ag

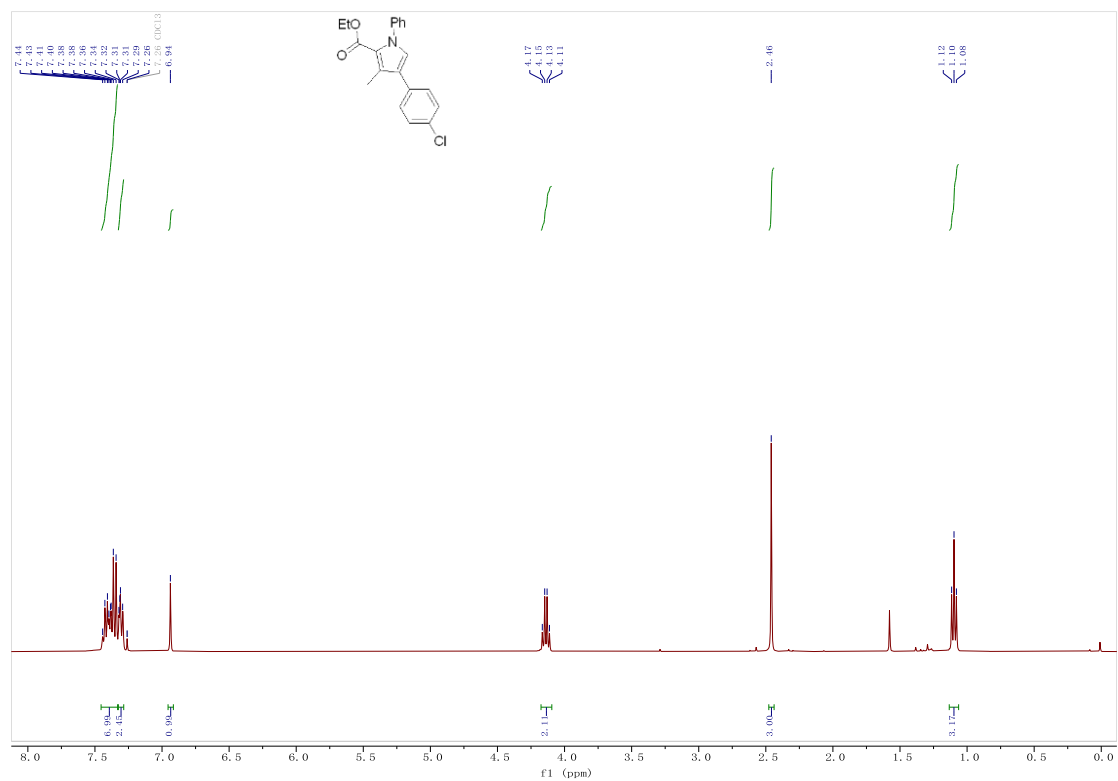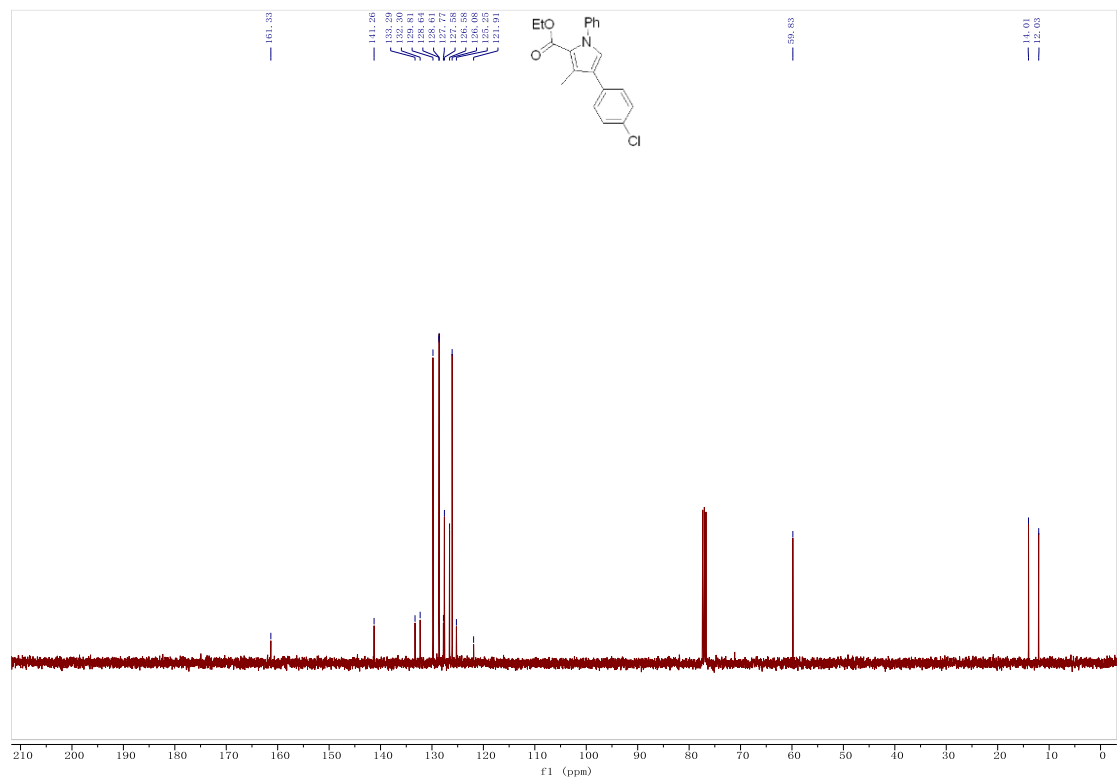

4ah

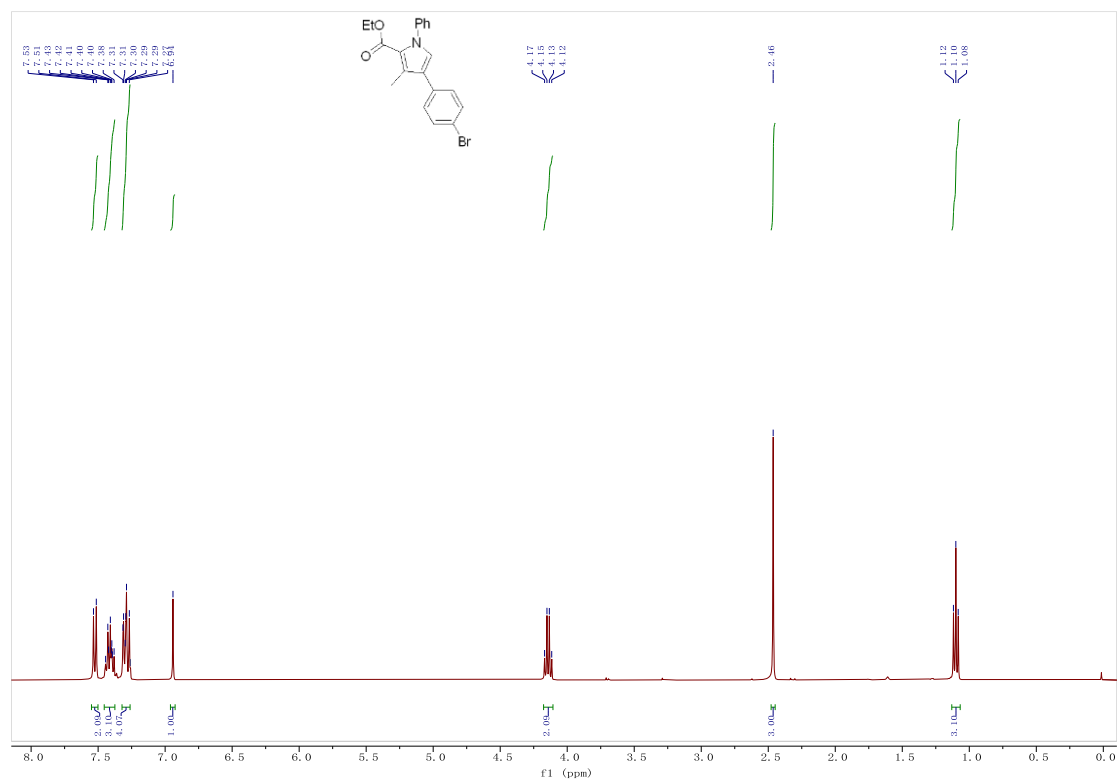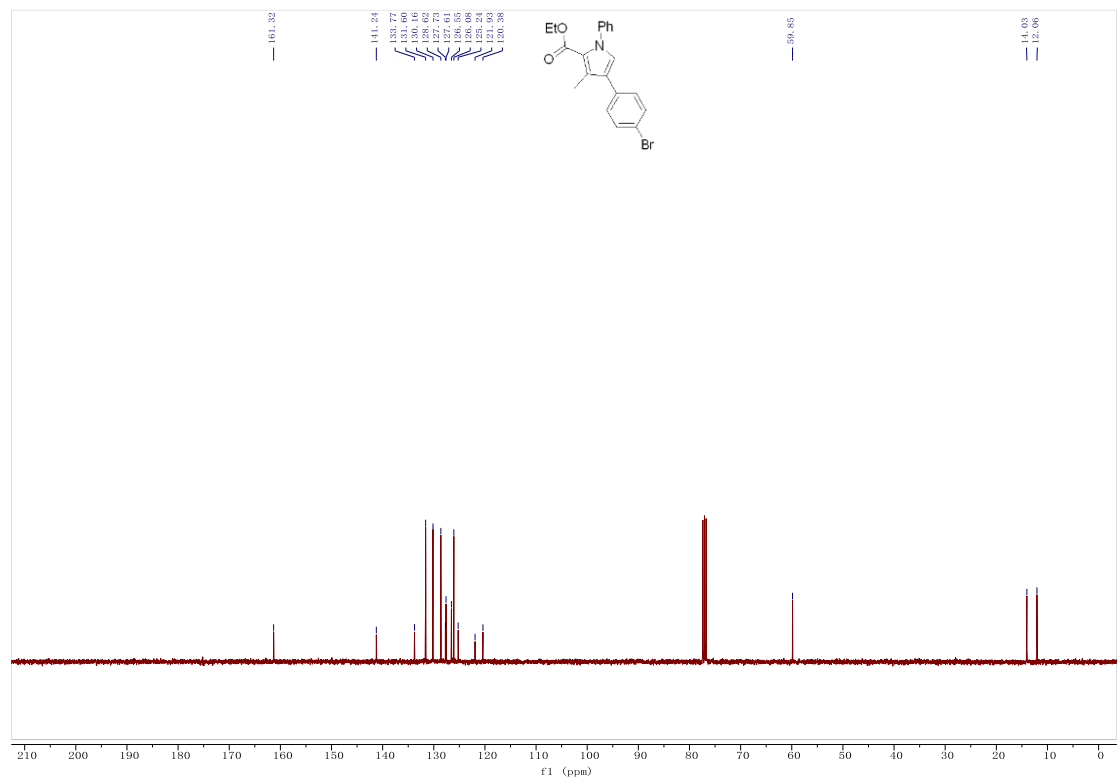

4ai

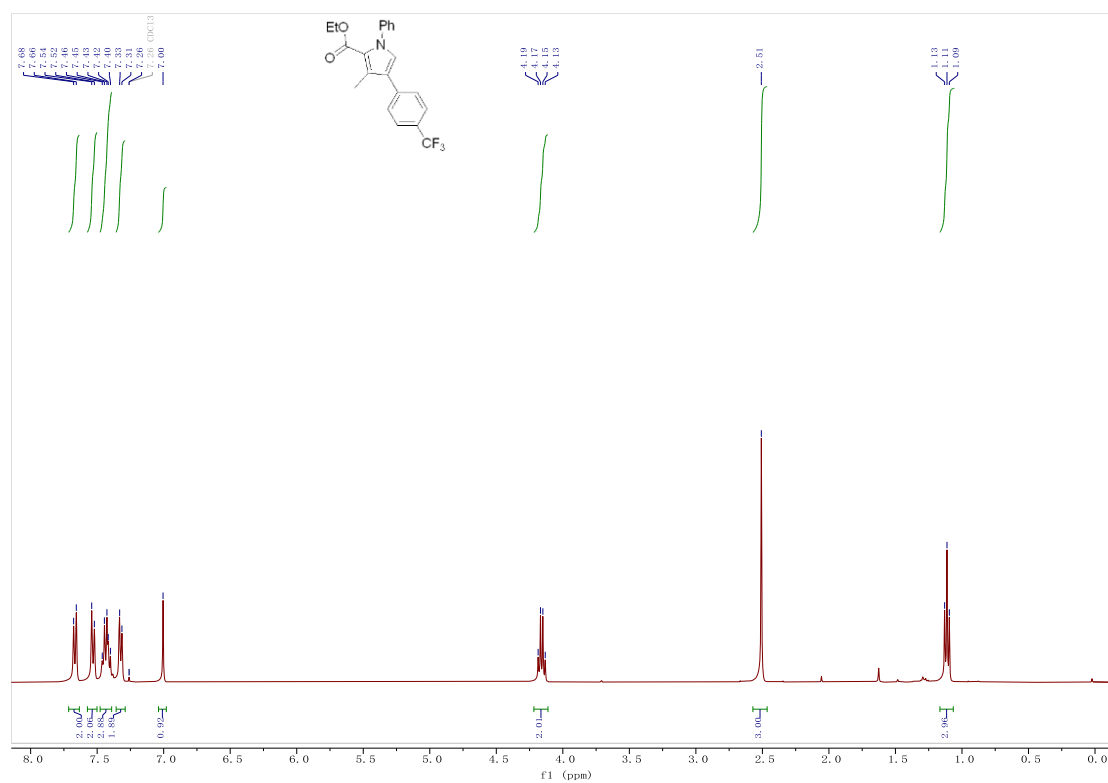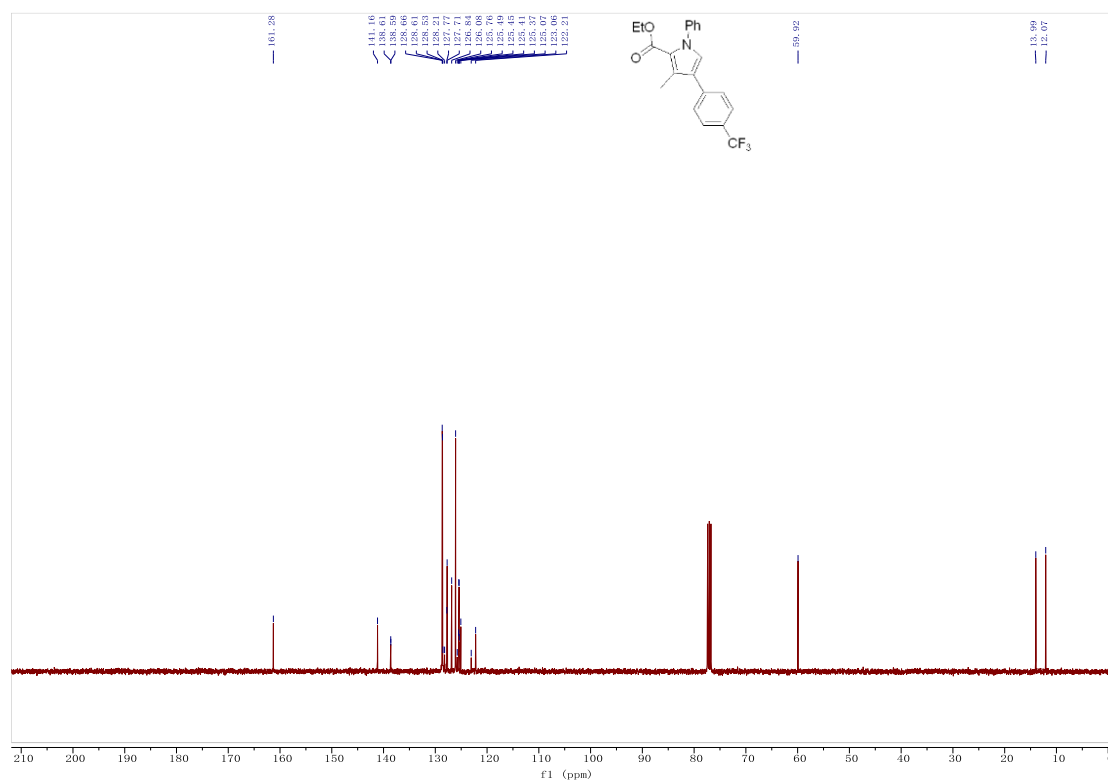

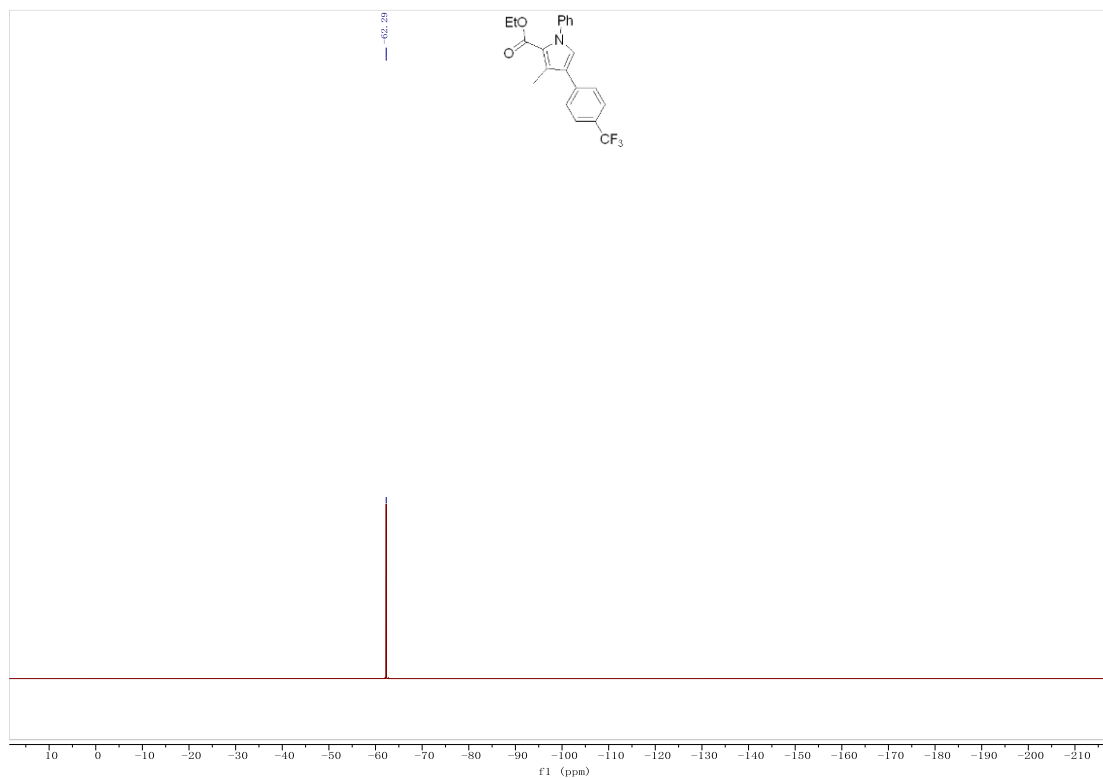

4aj

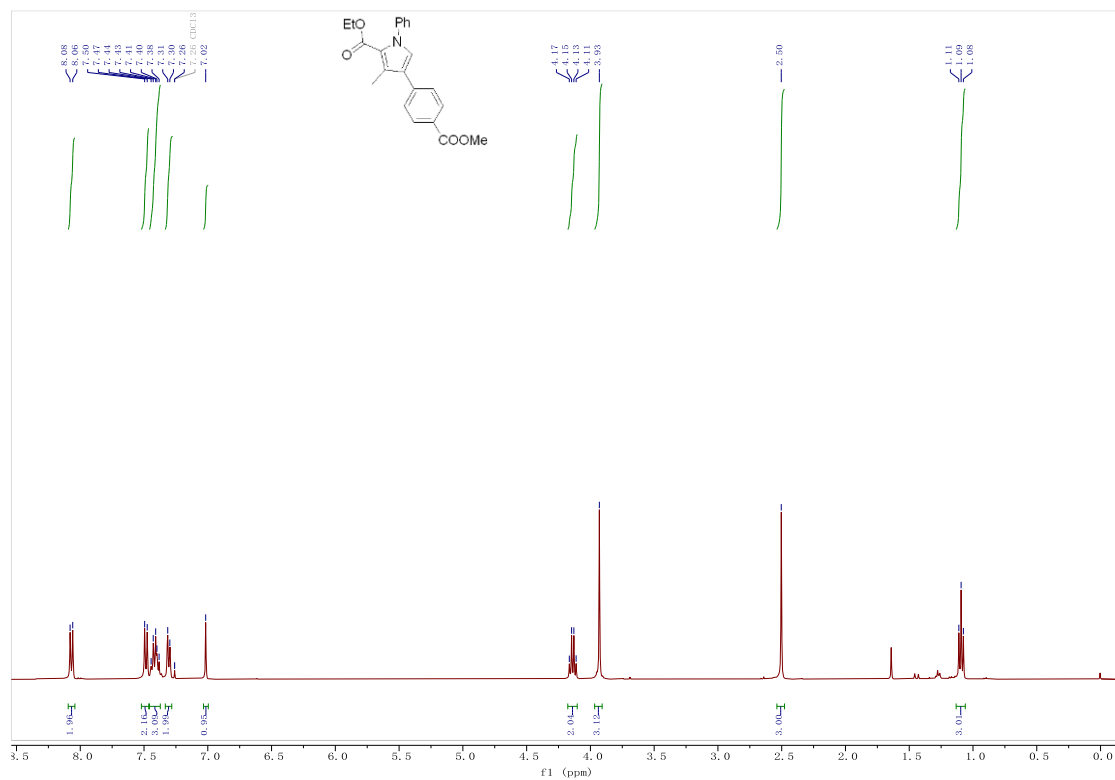

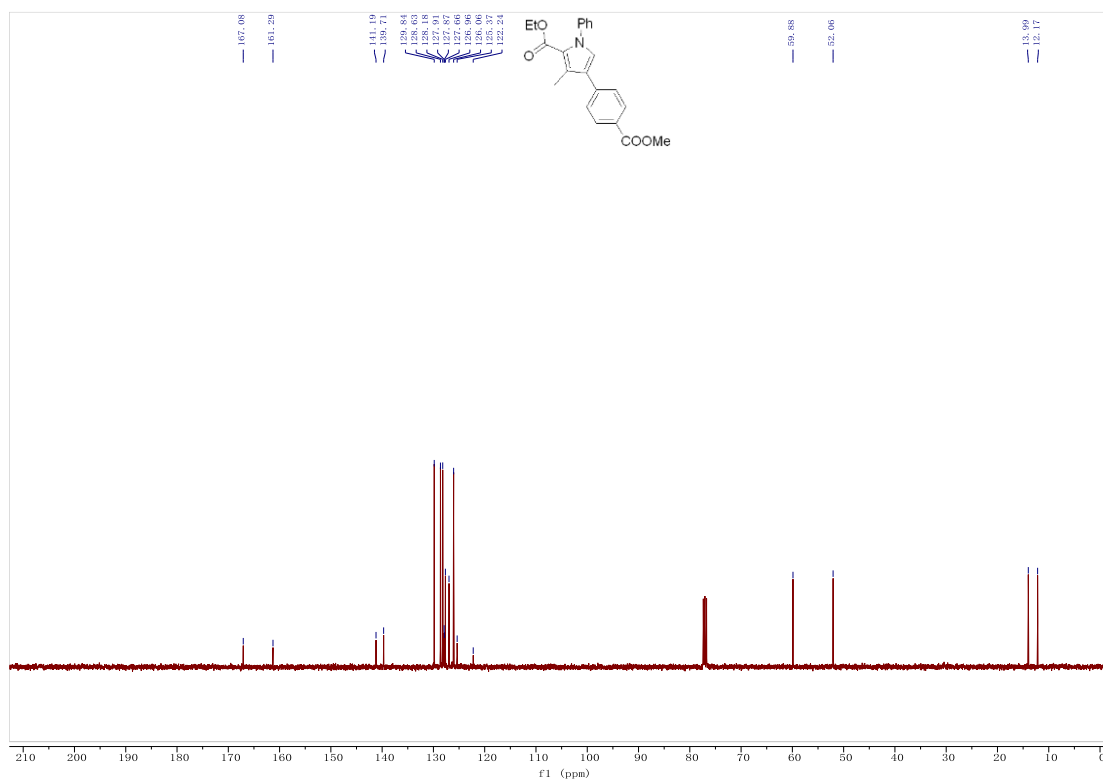

#### 4ak

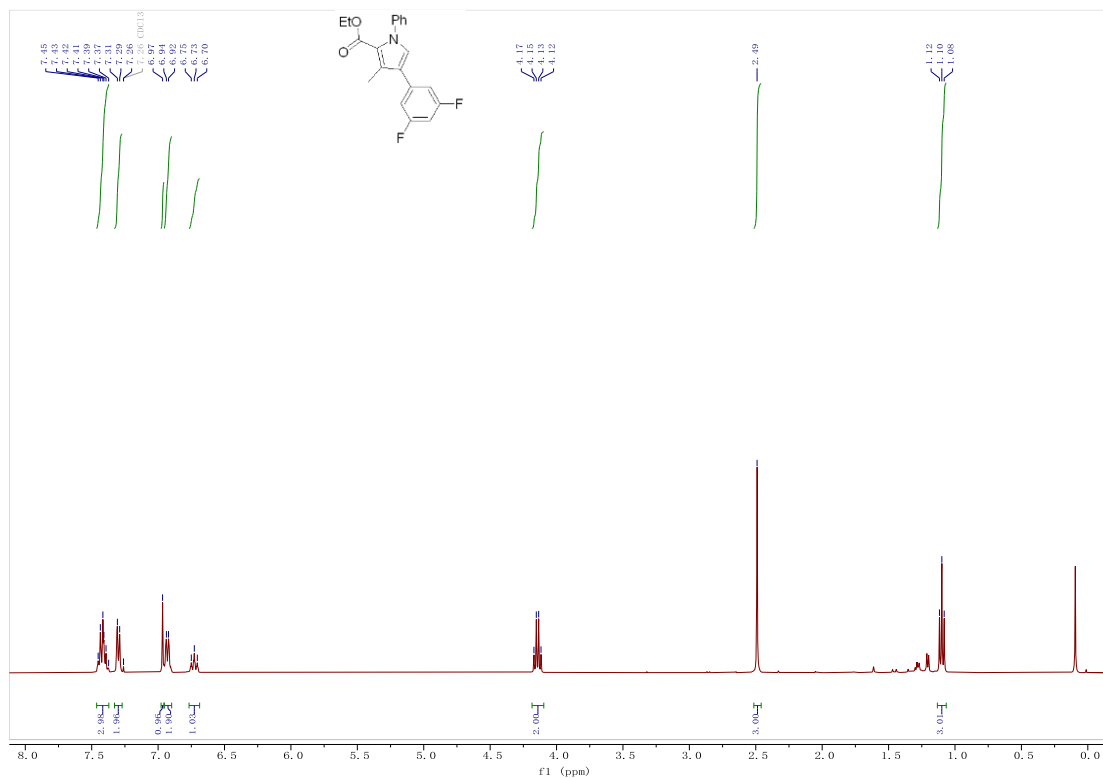

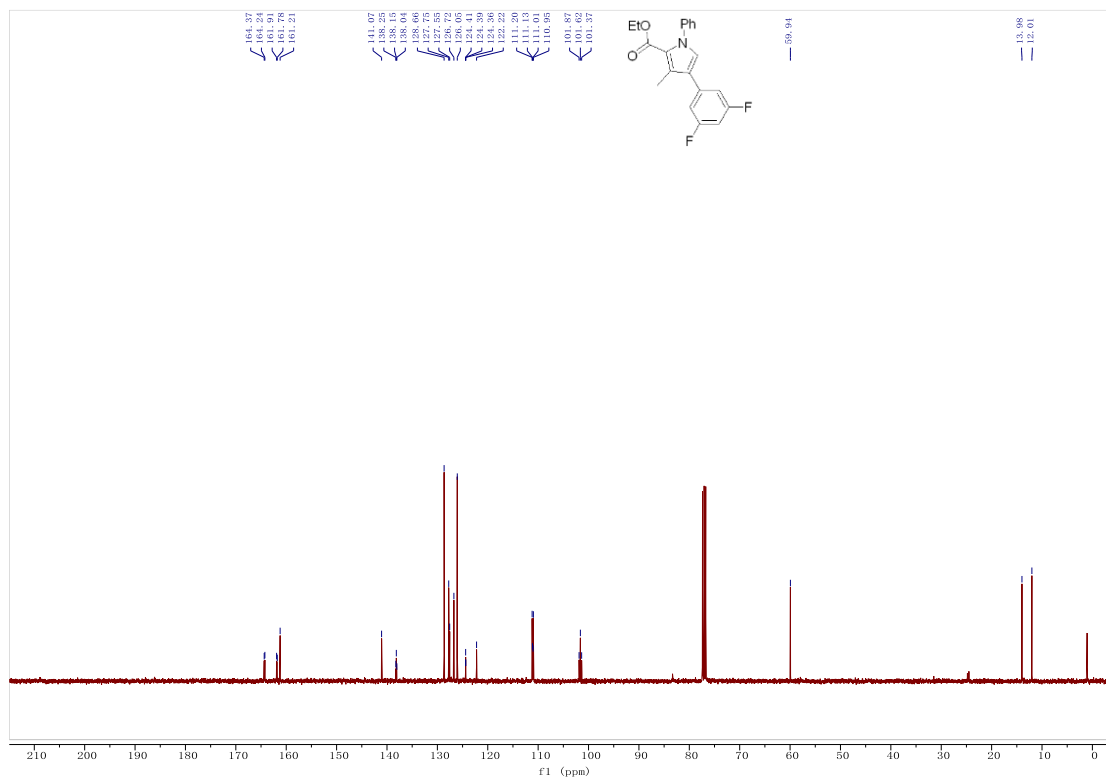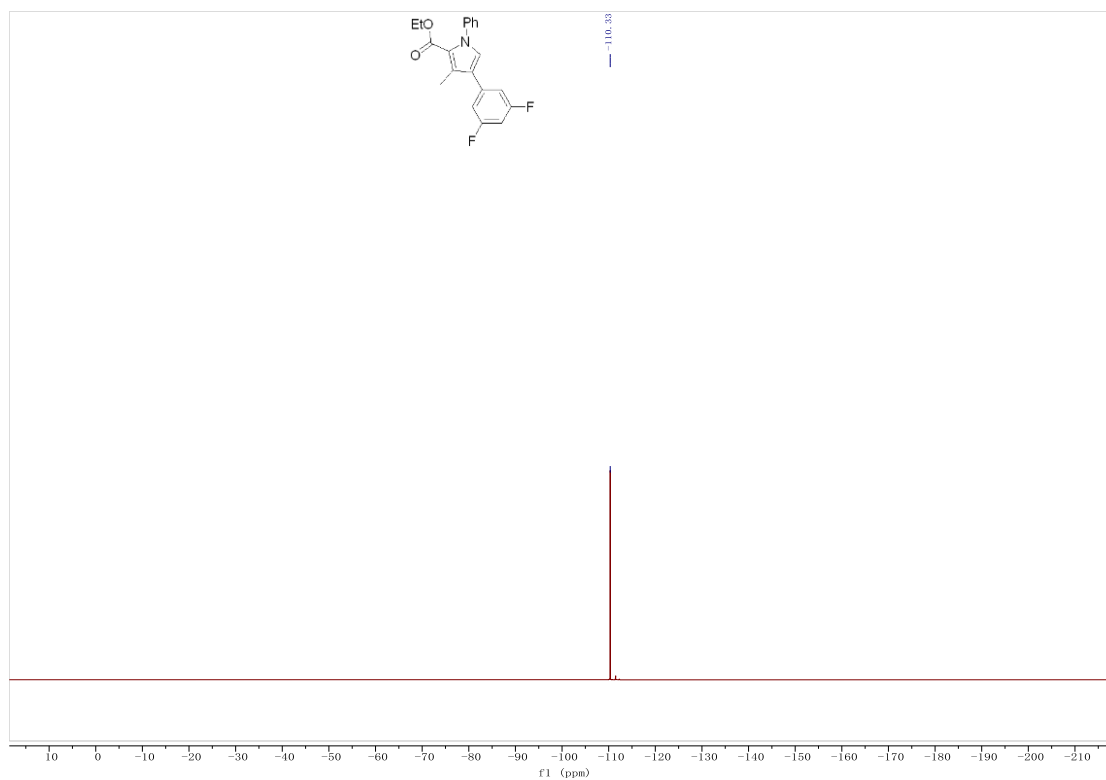

4ap

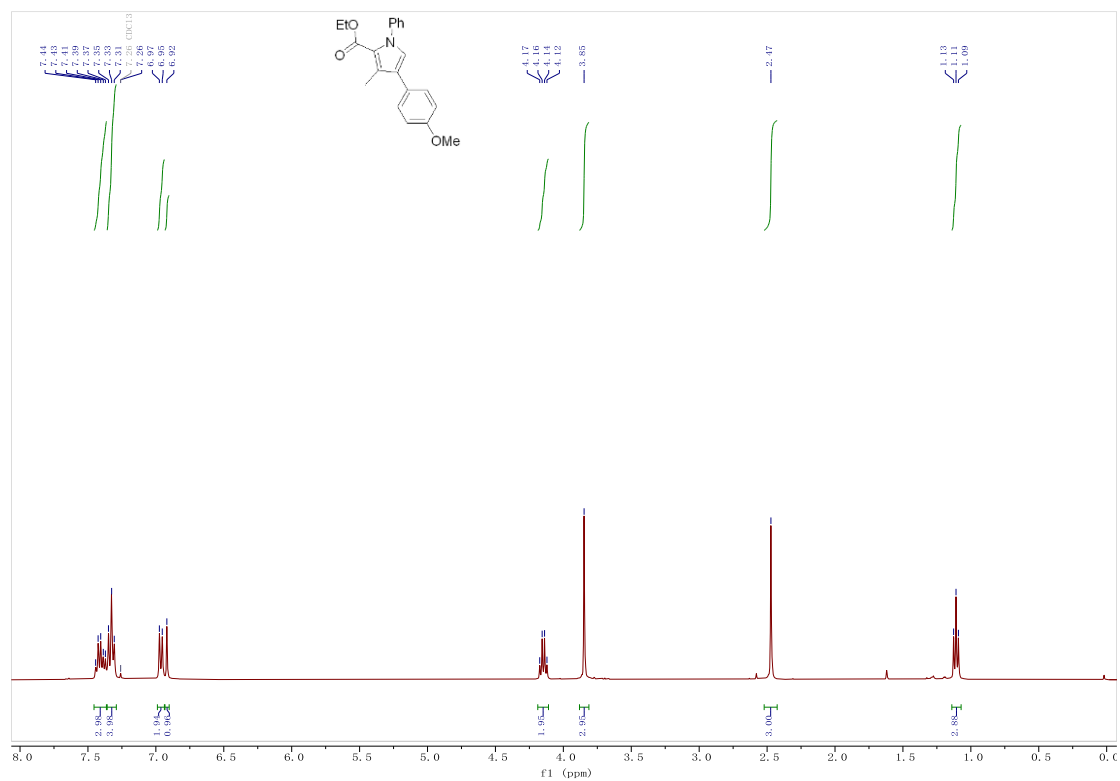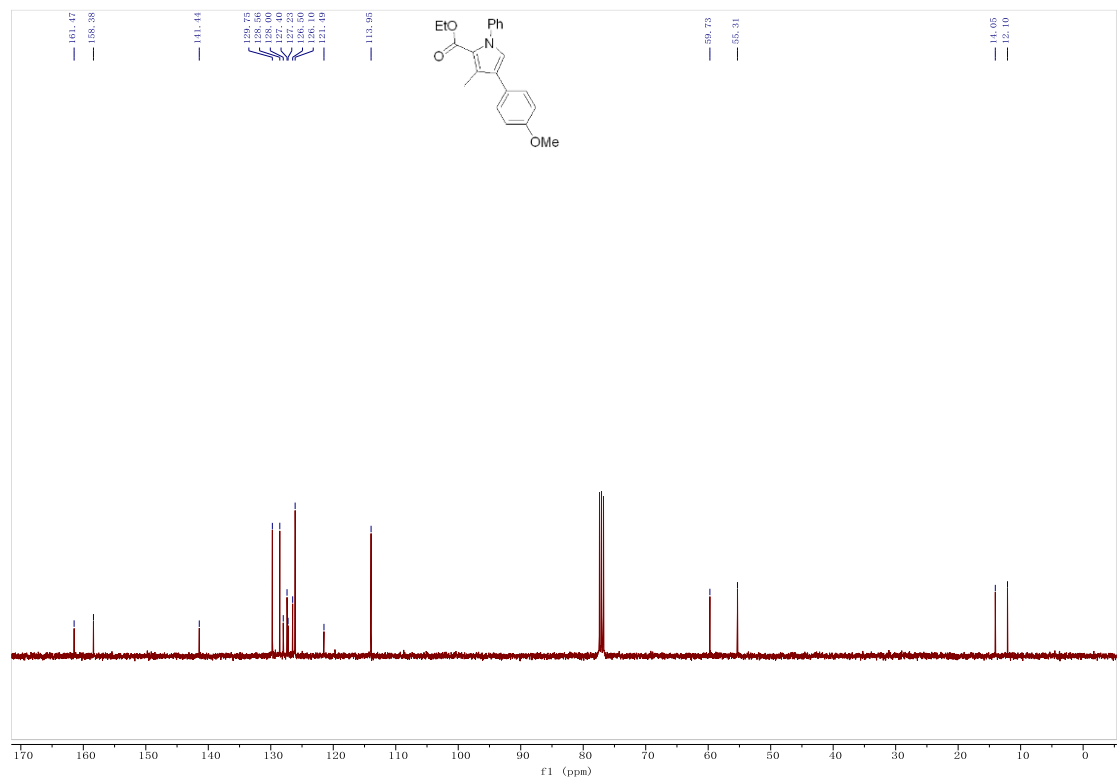



4am

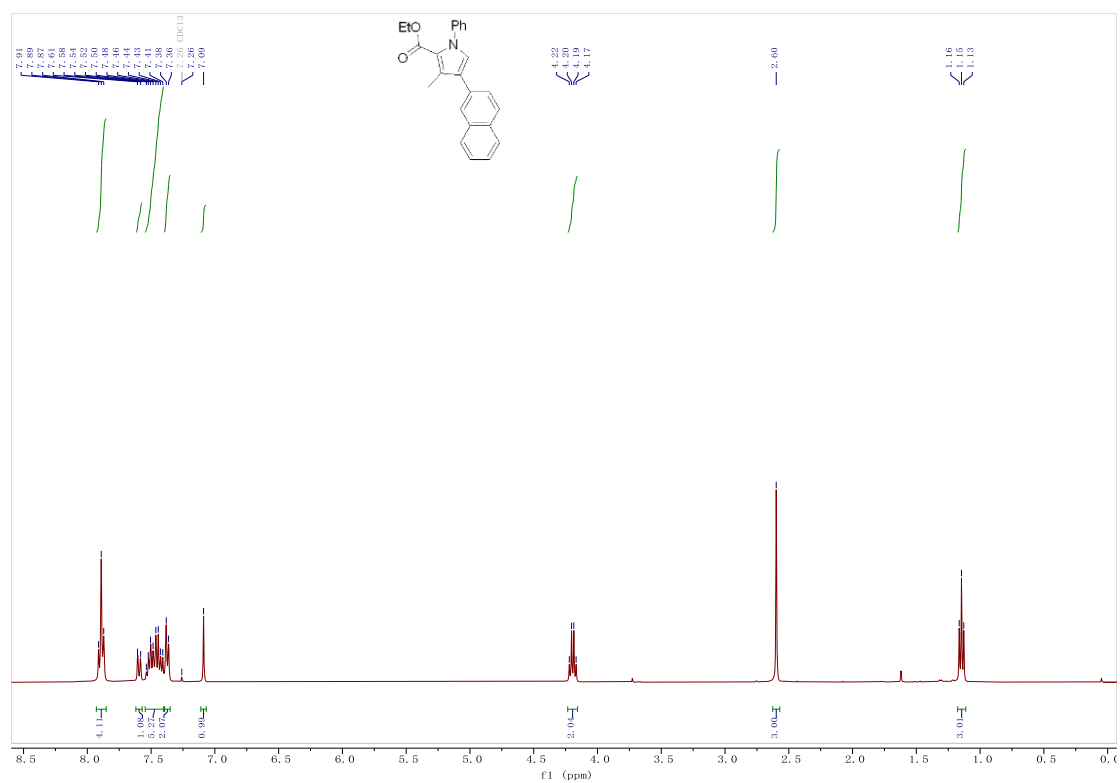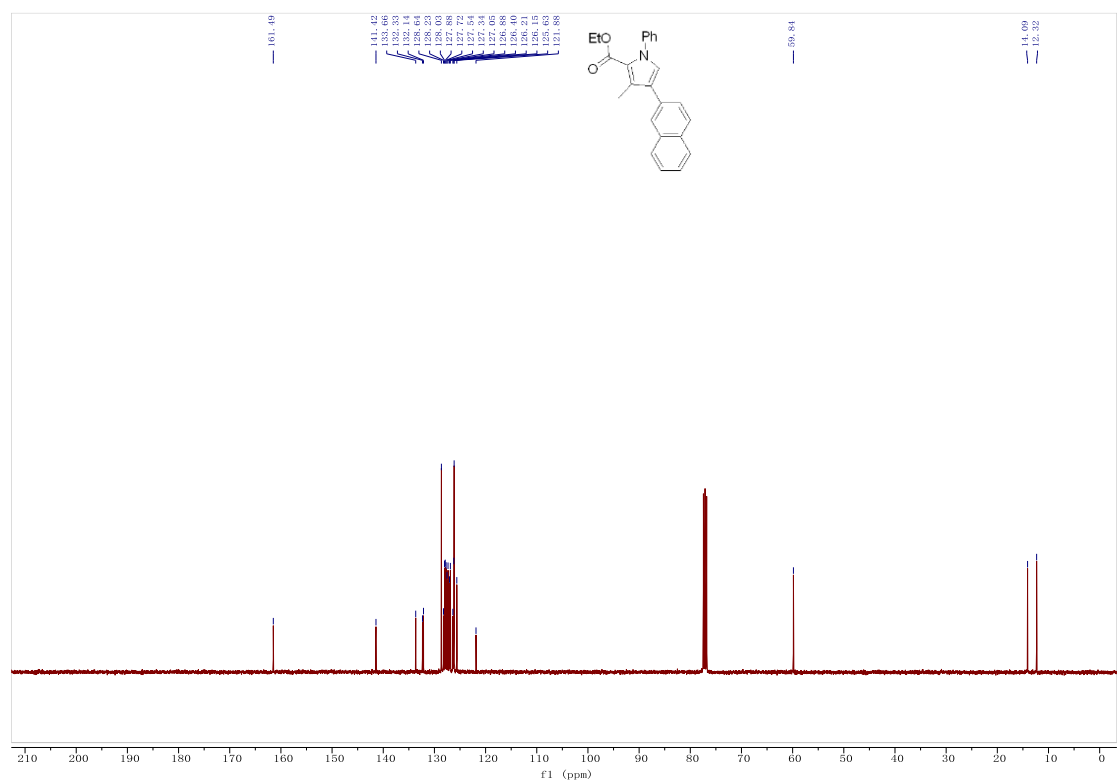

4an

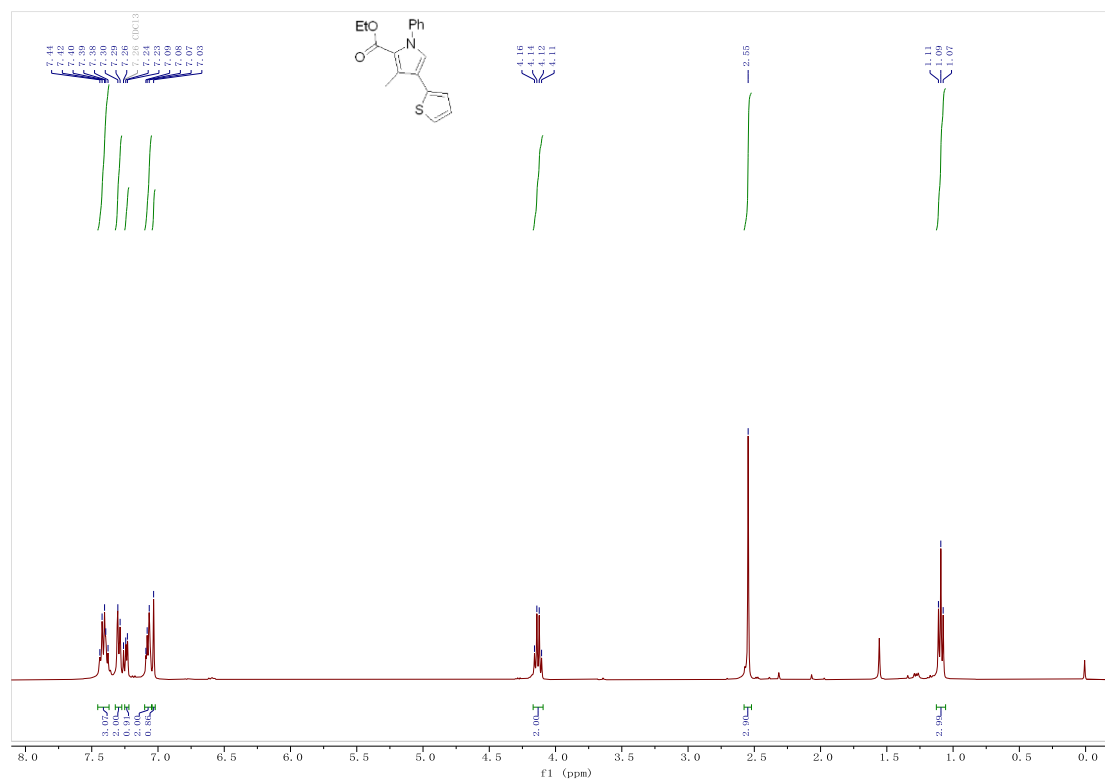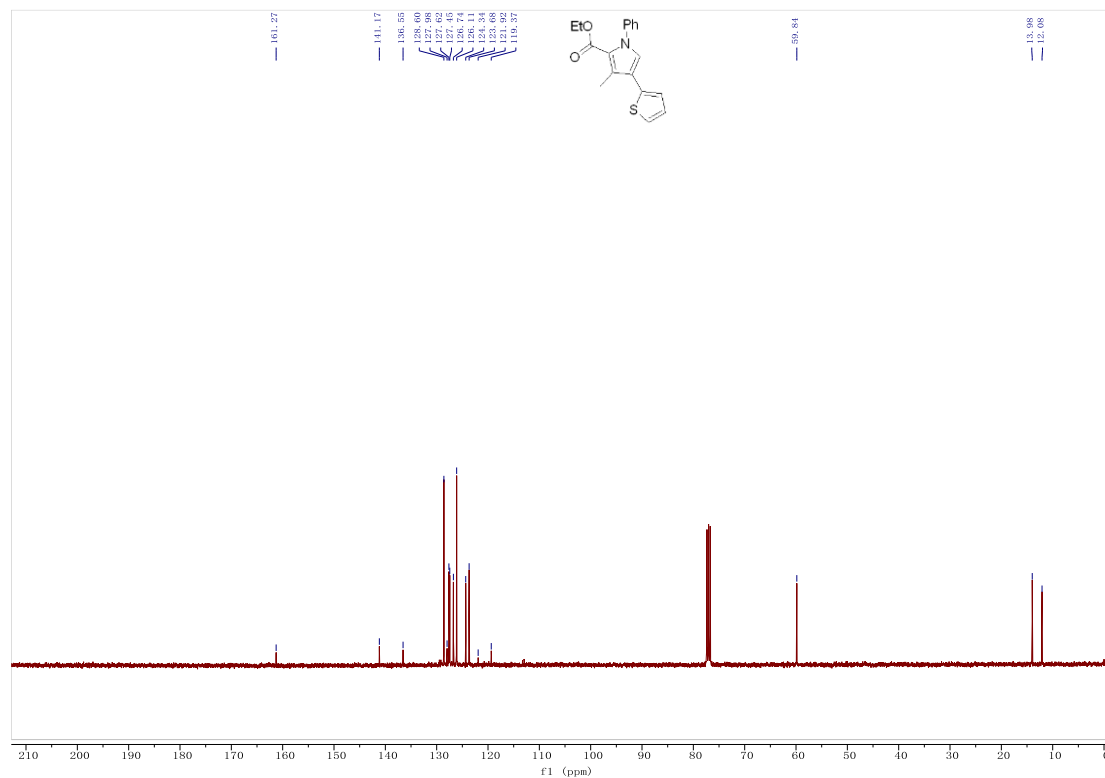

4ao

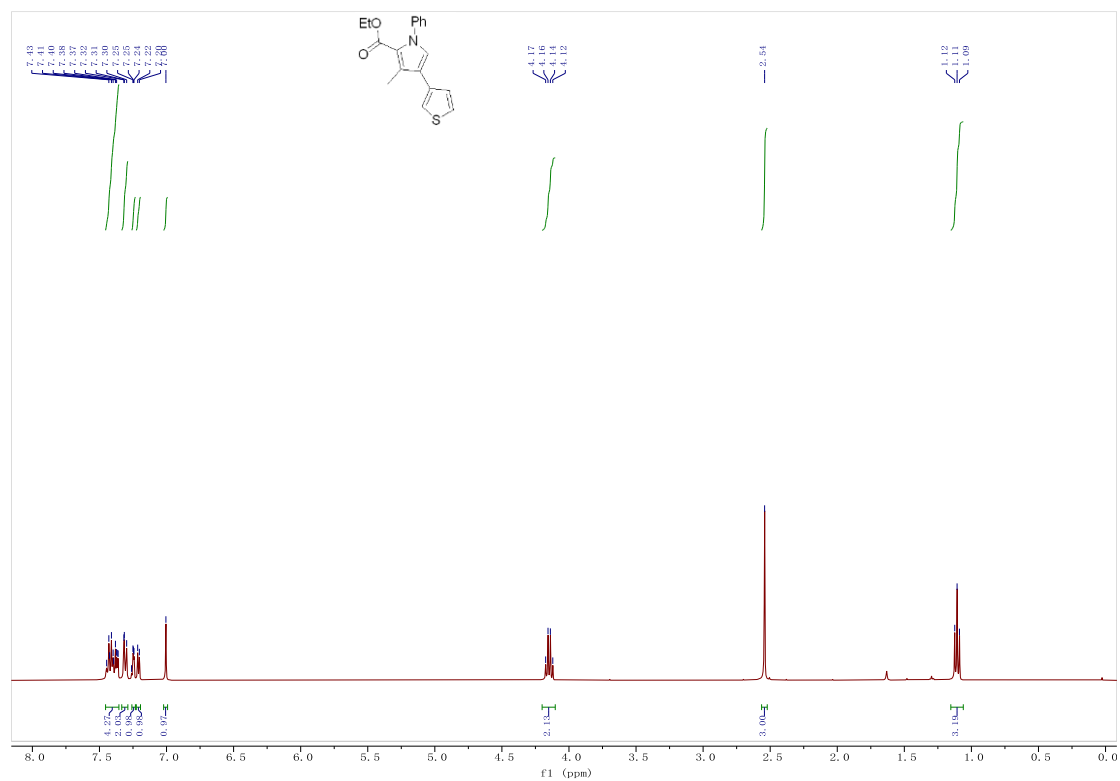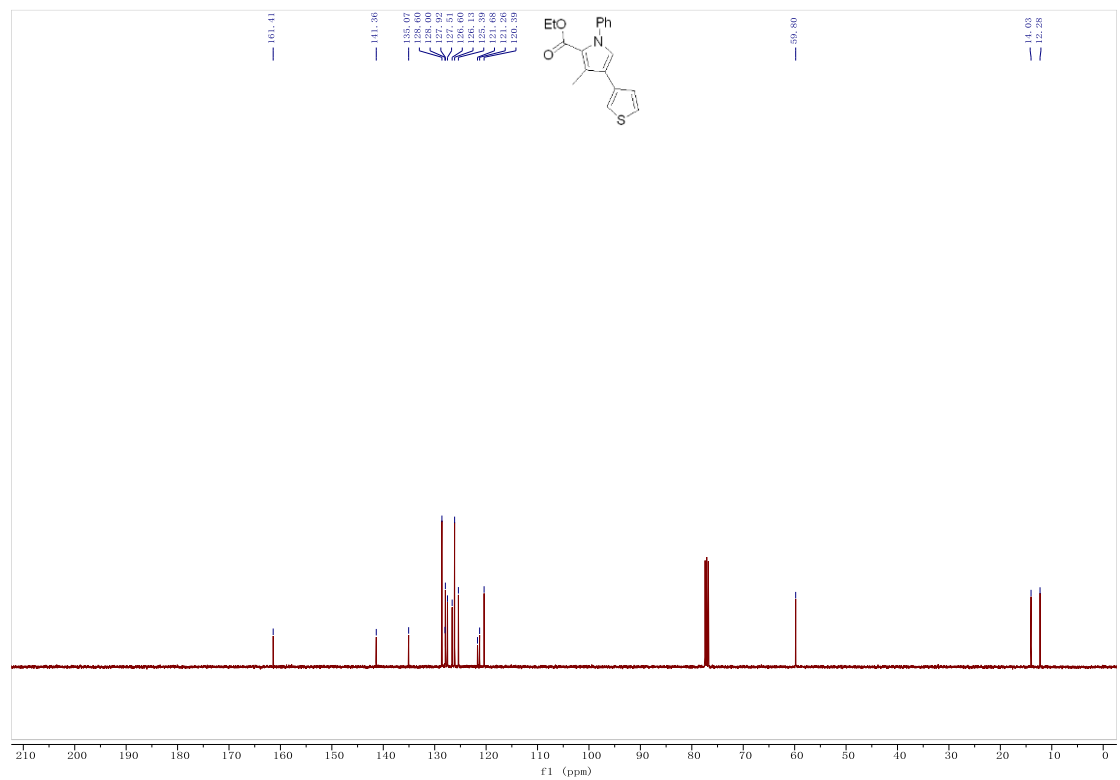

4aq

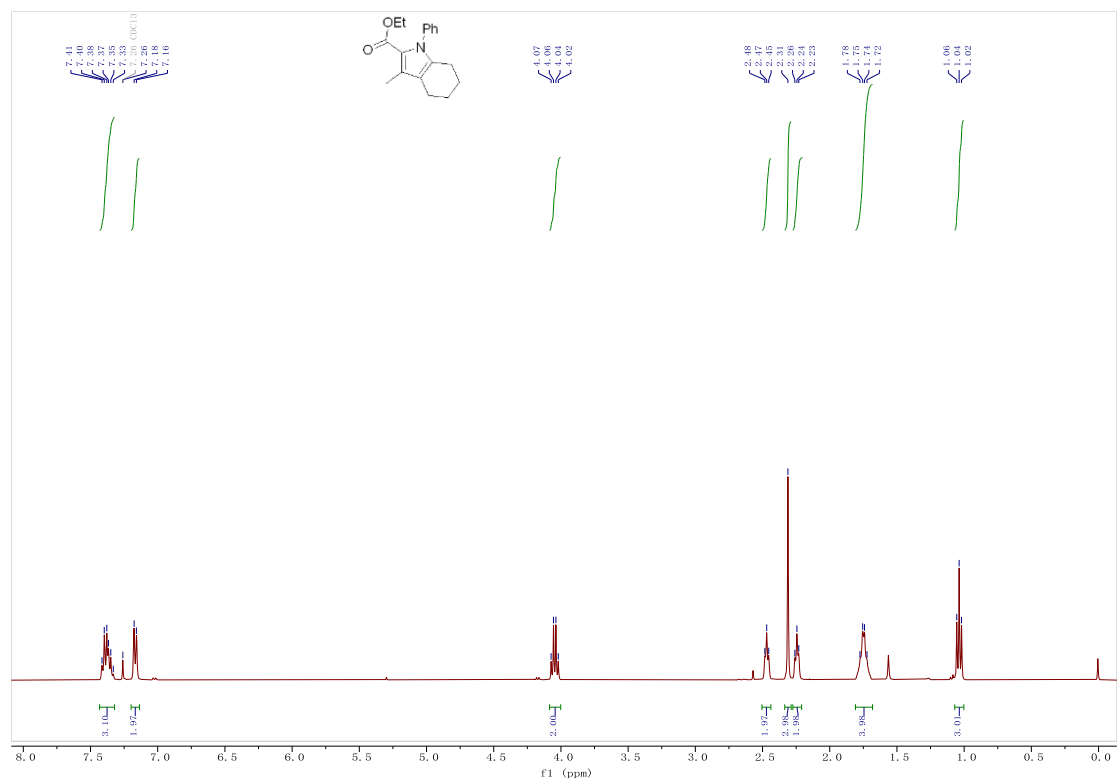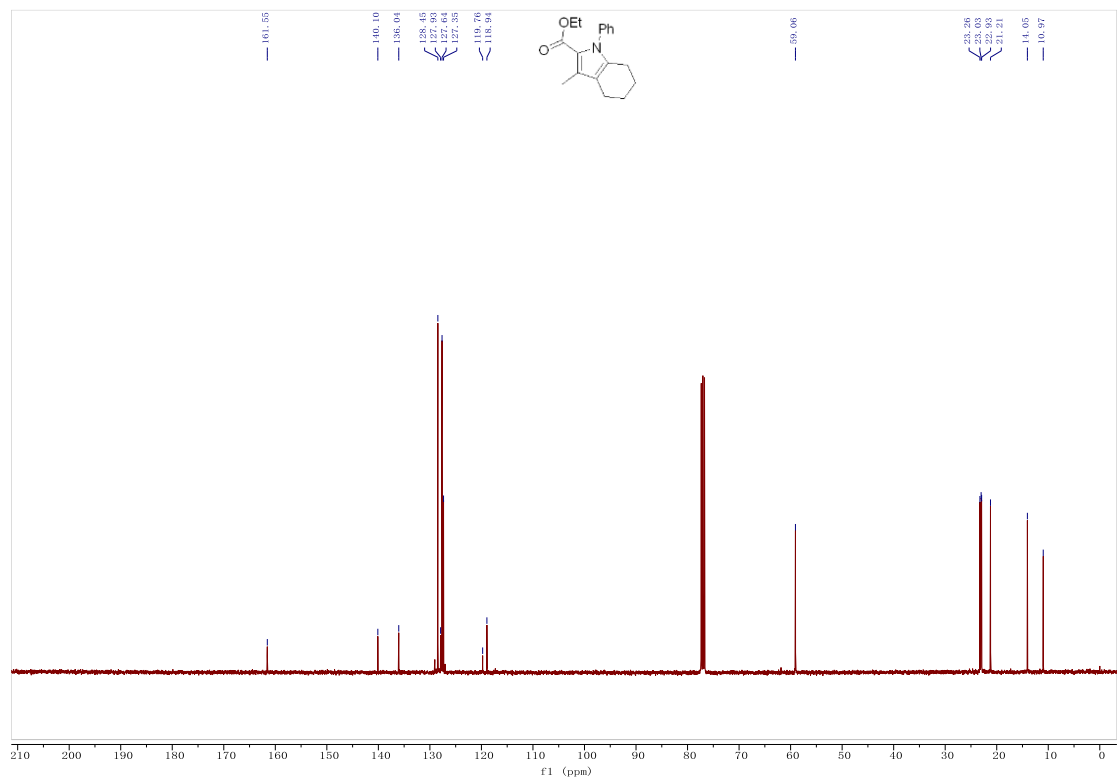

4ar

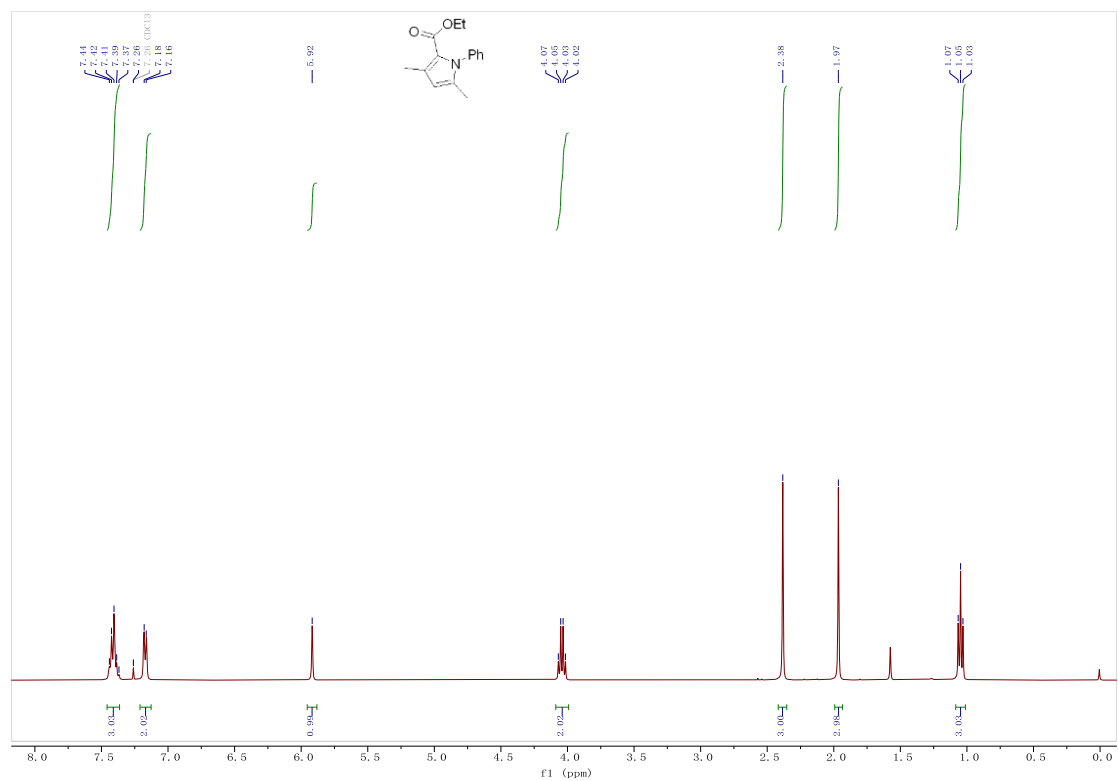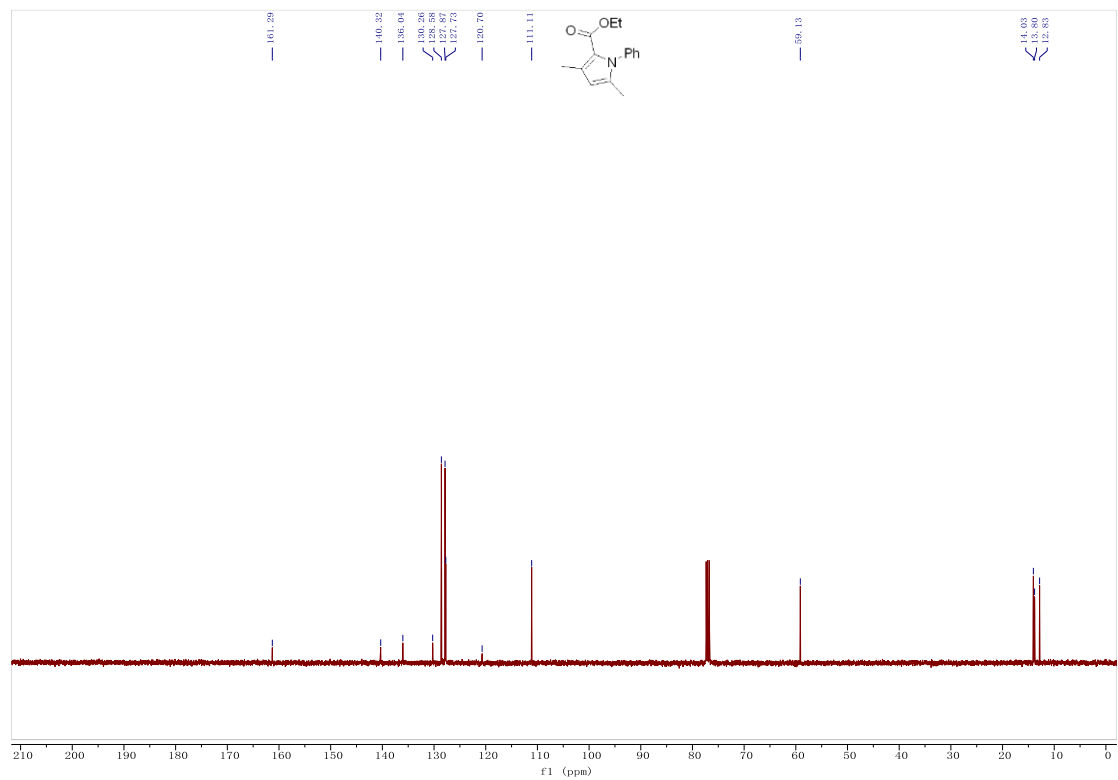

4as

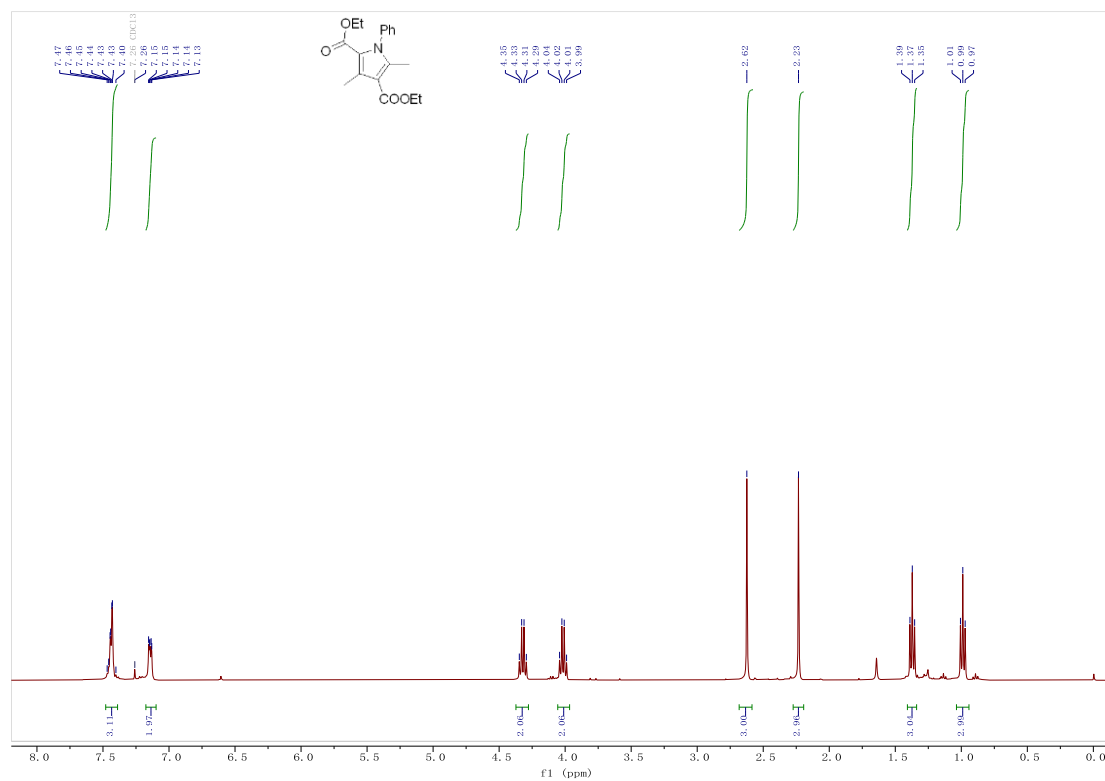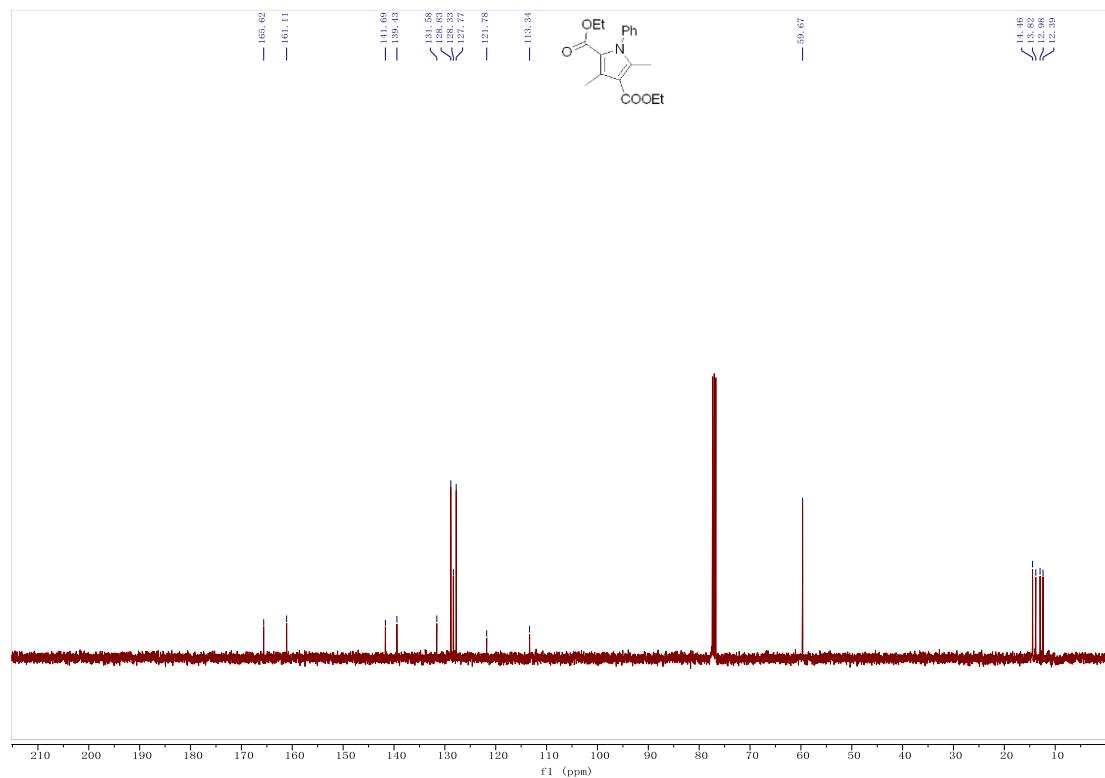

4ba

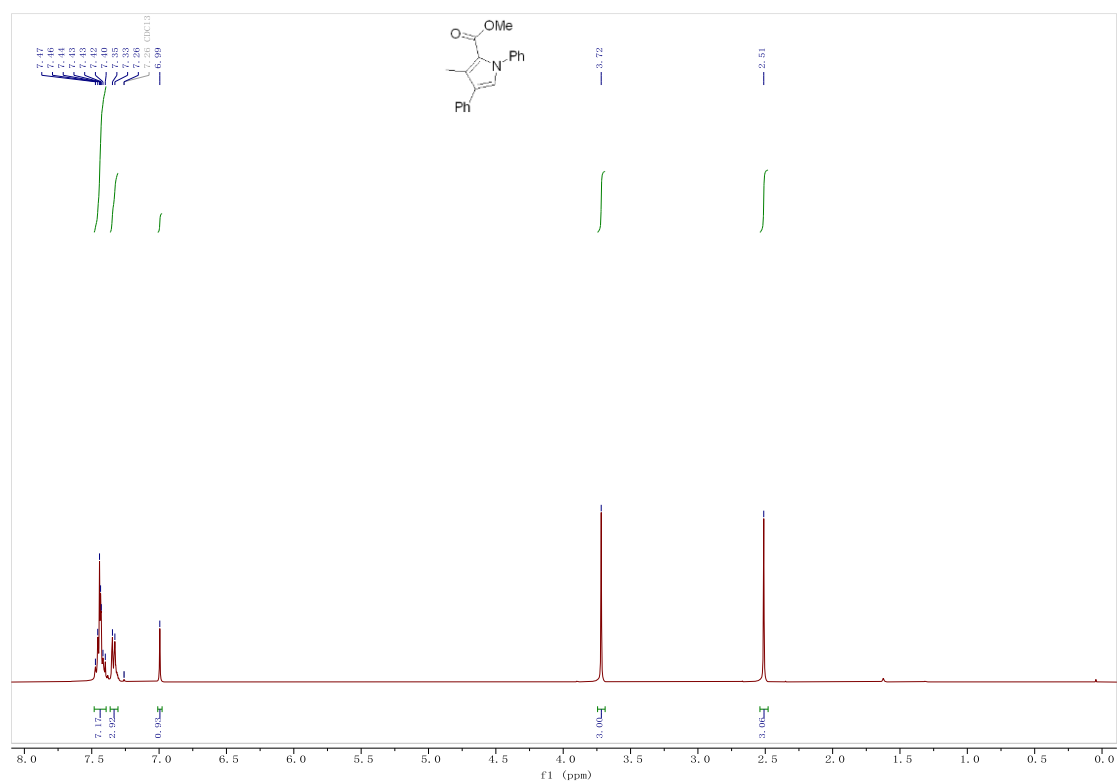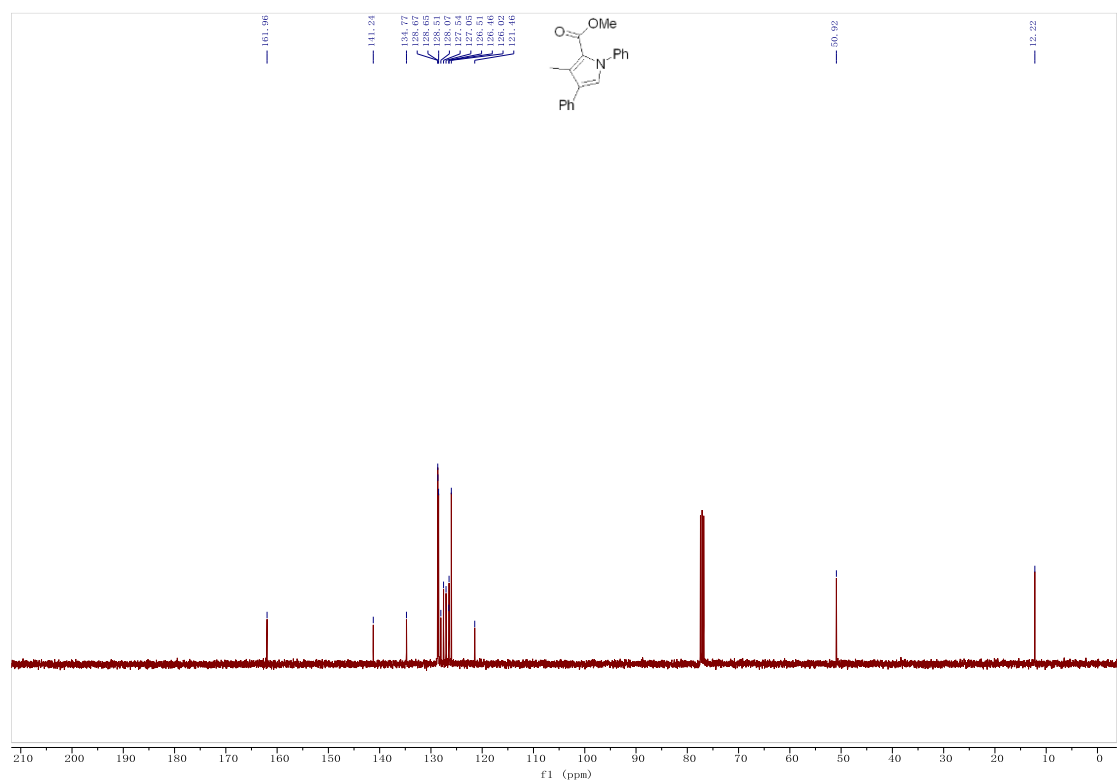

4ca

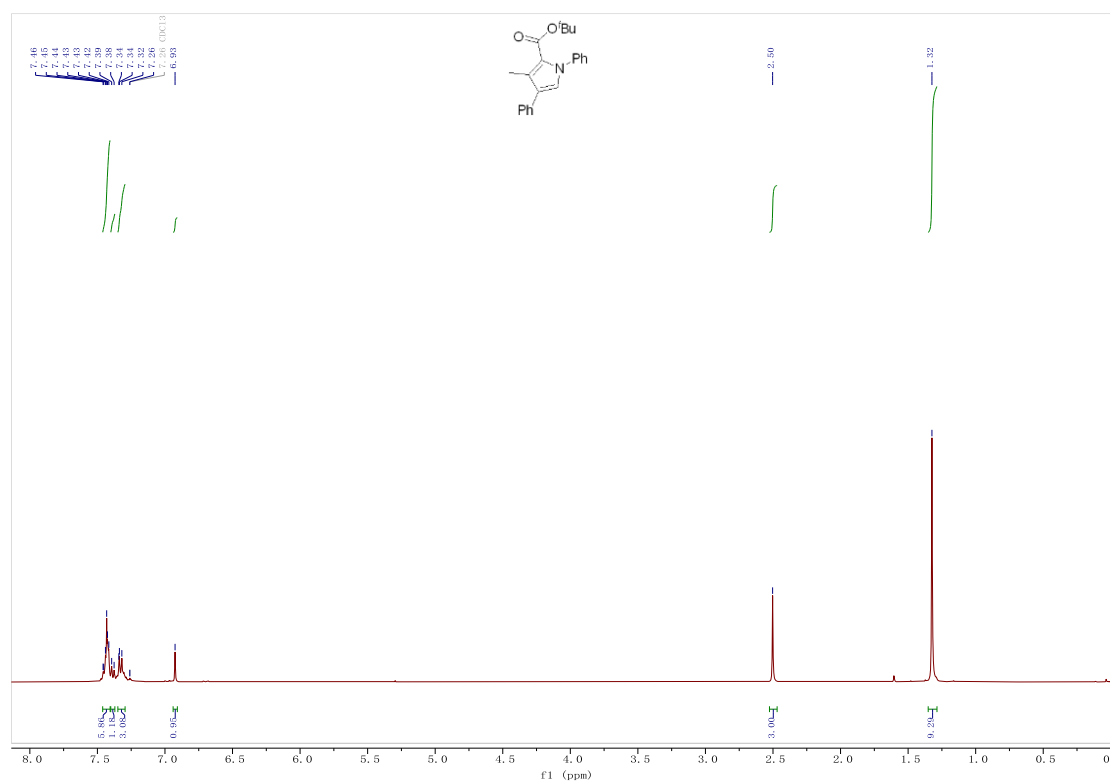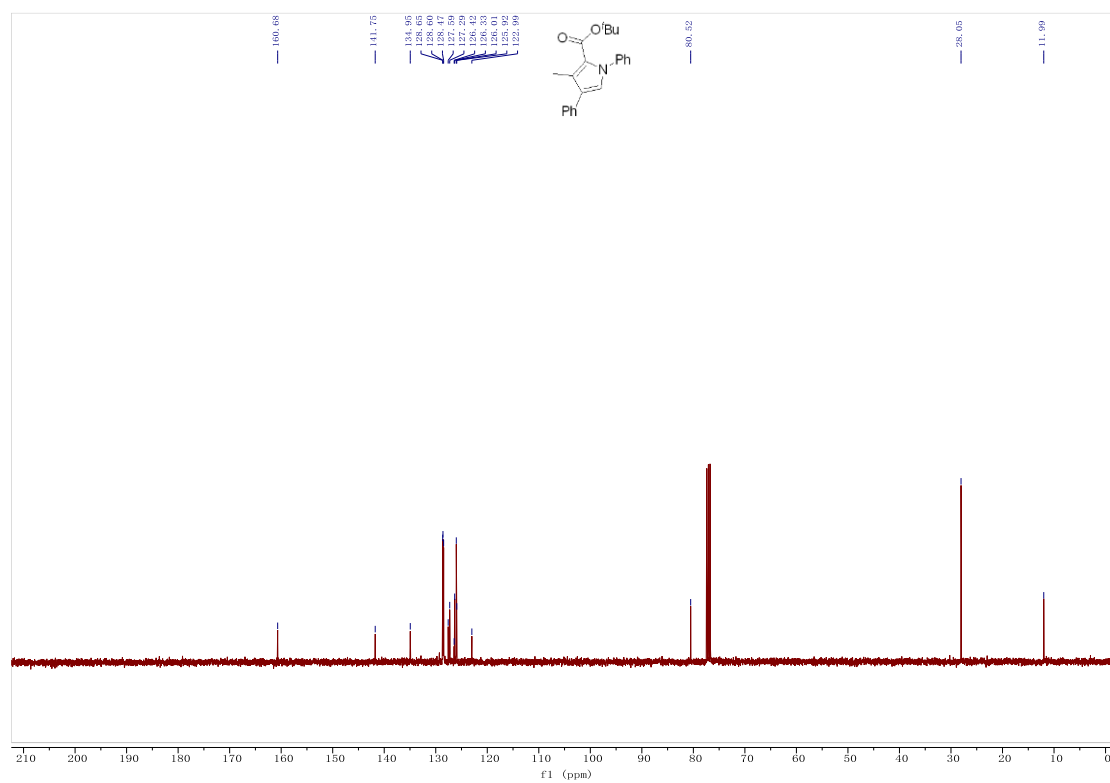



4da

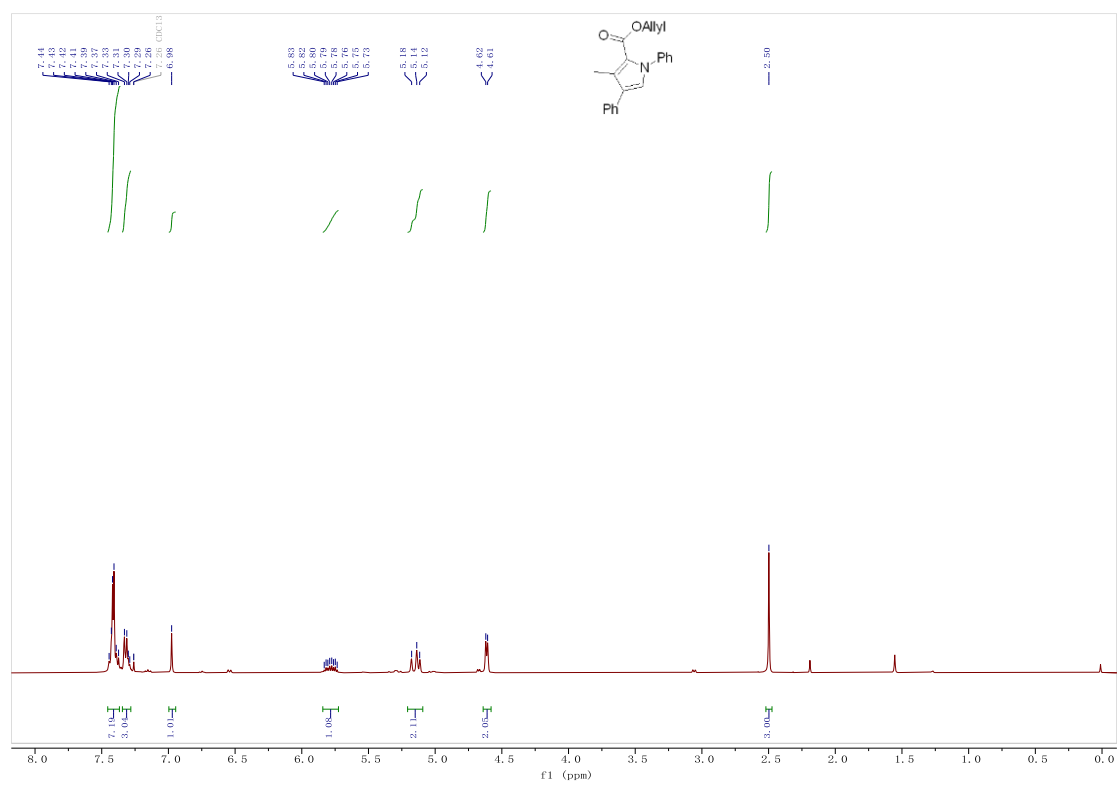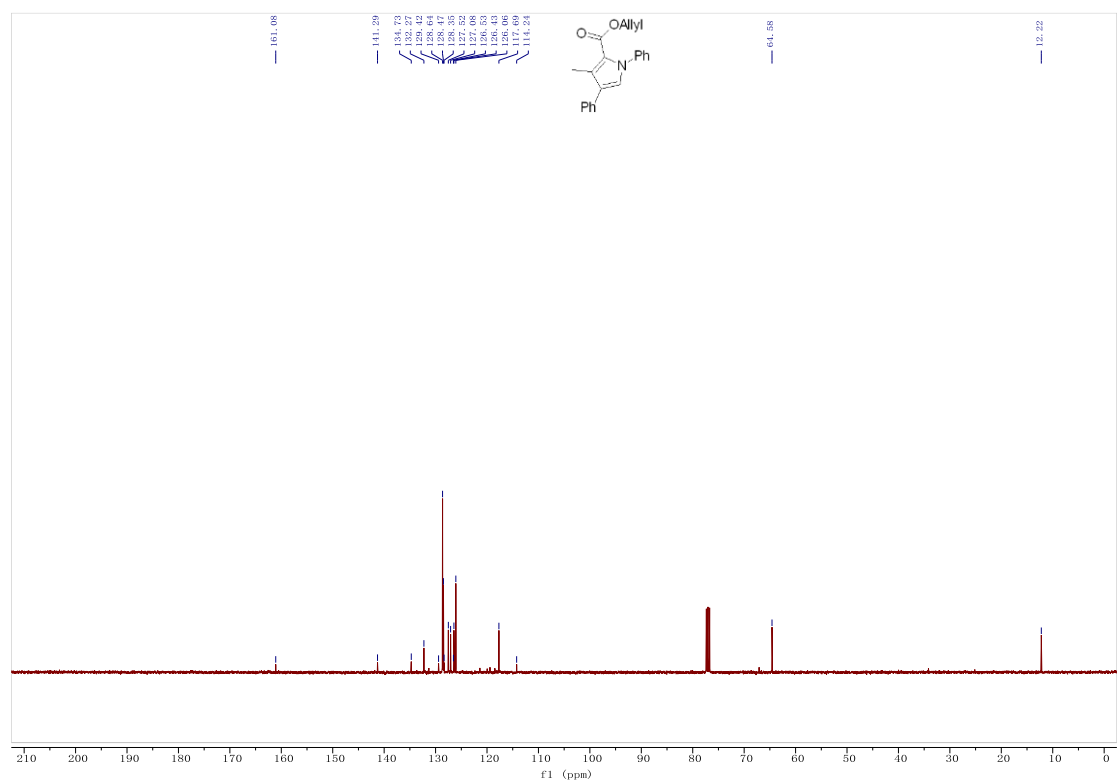

4ea

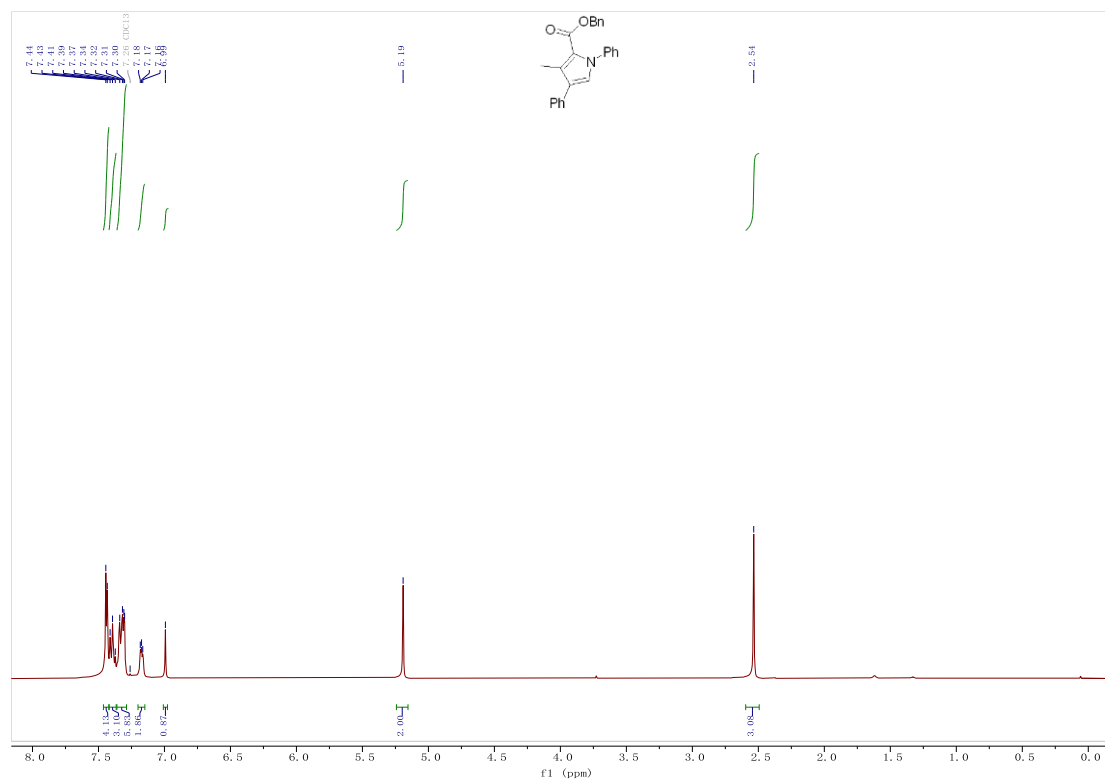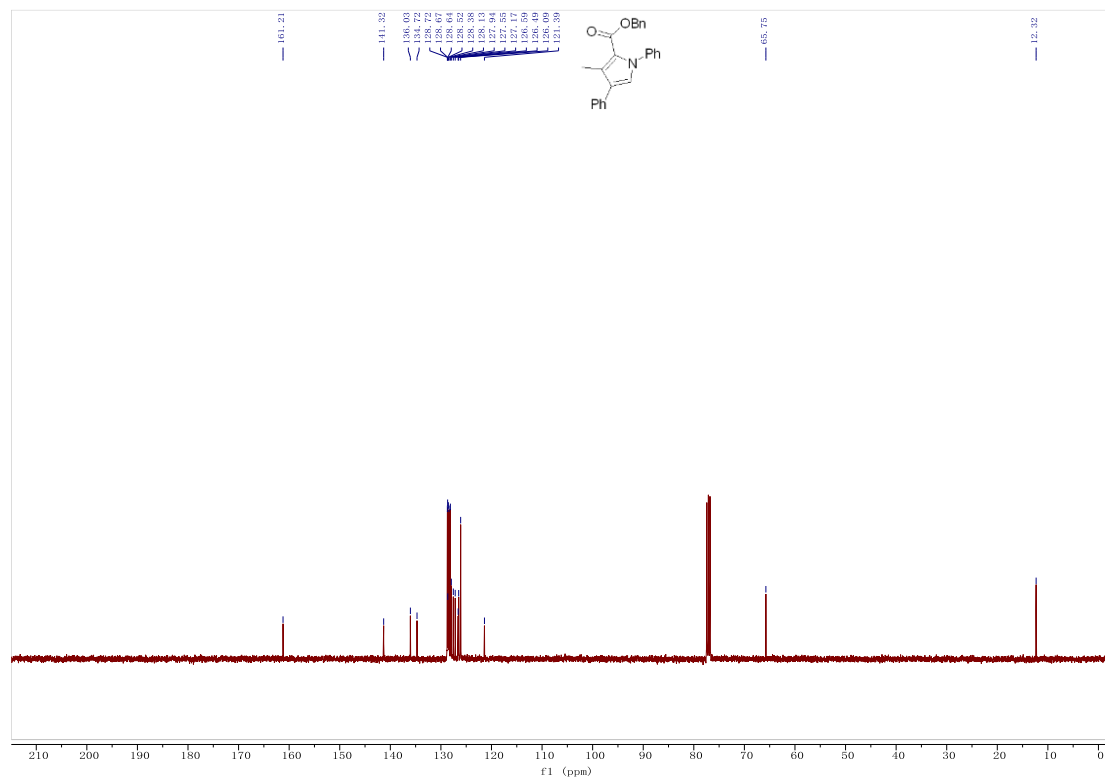

4ga

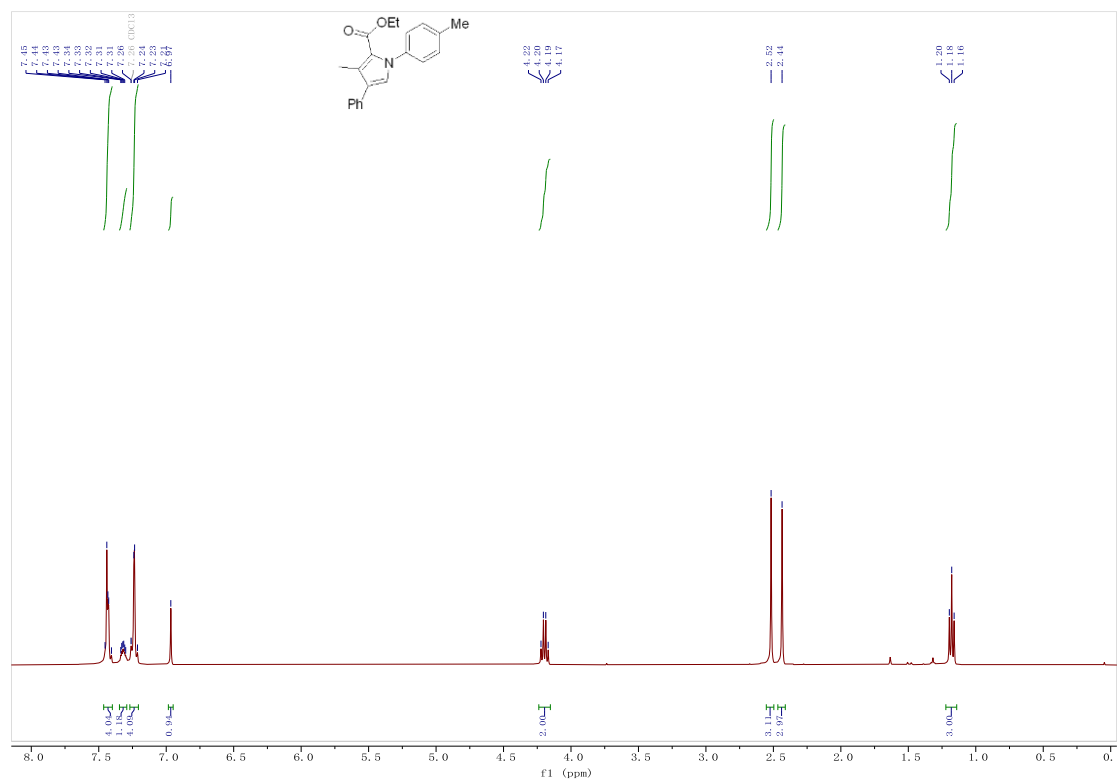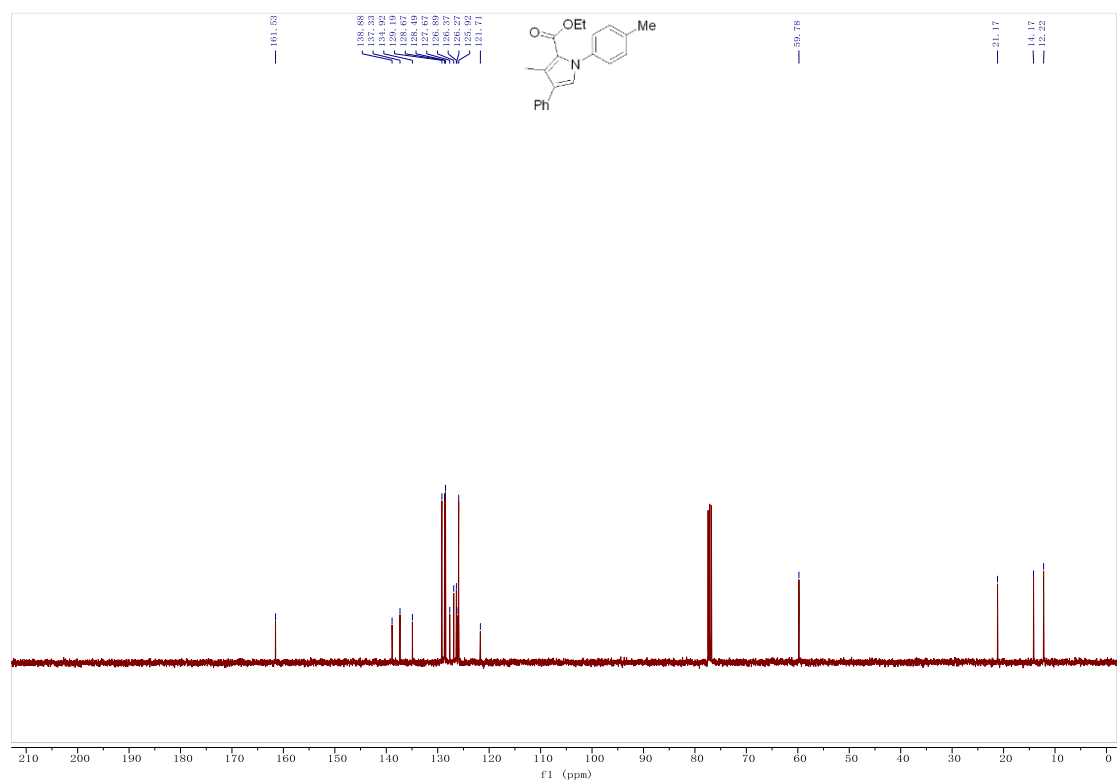

4na

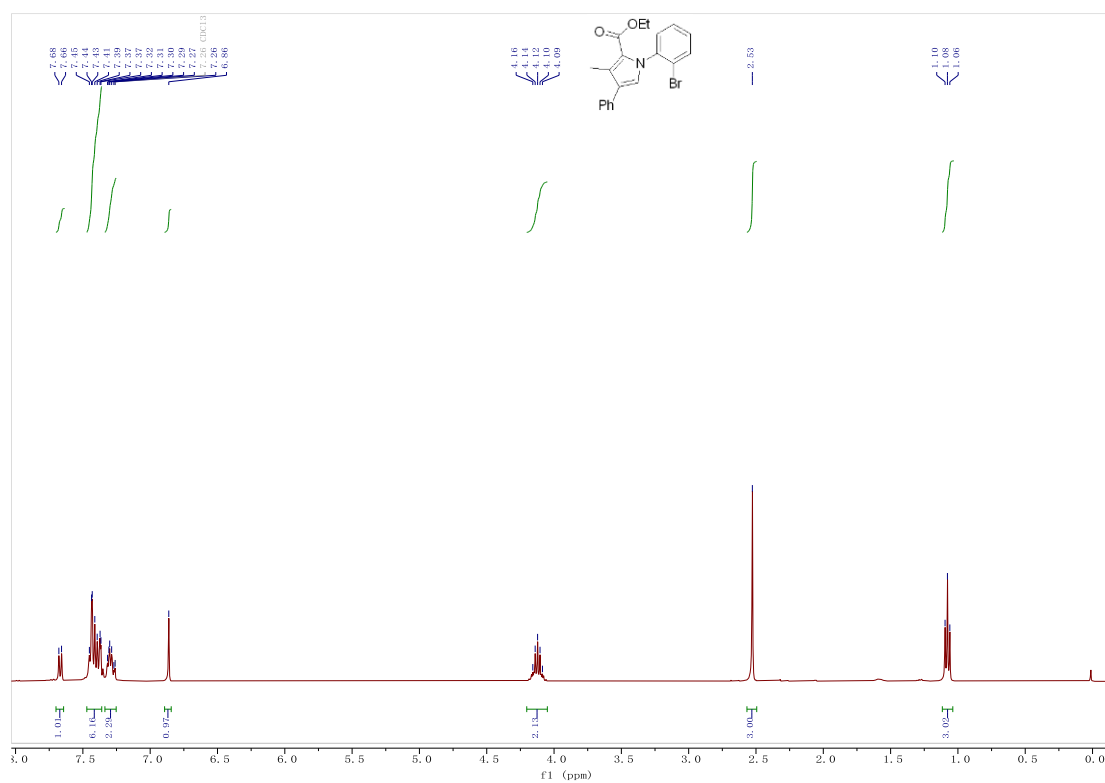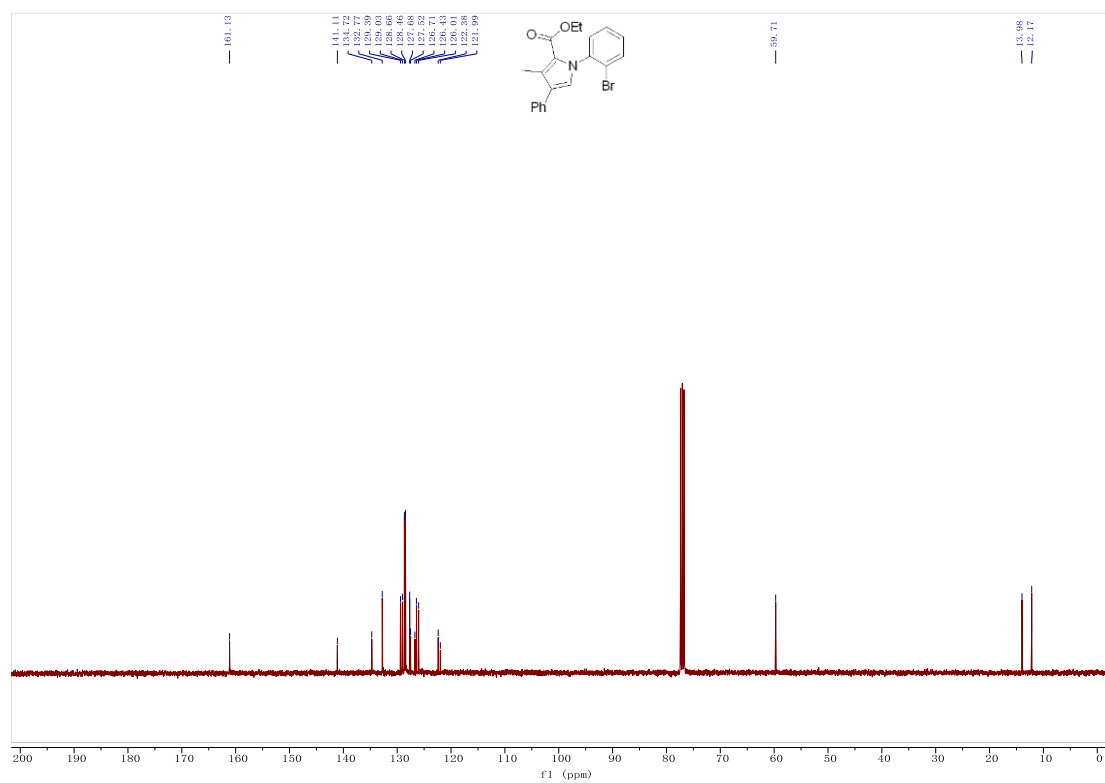

4qa

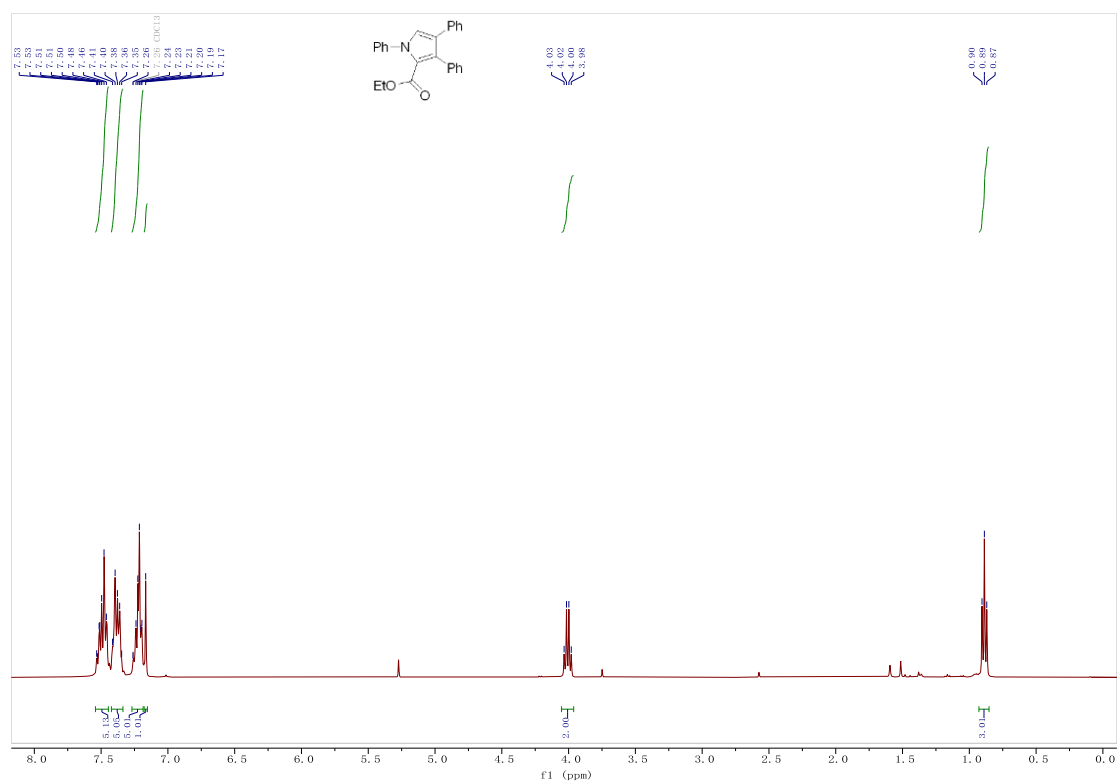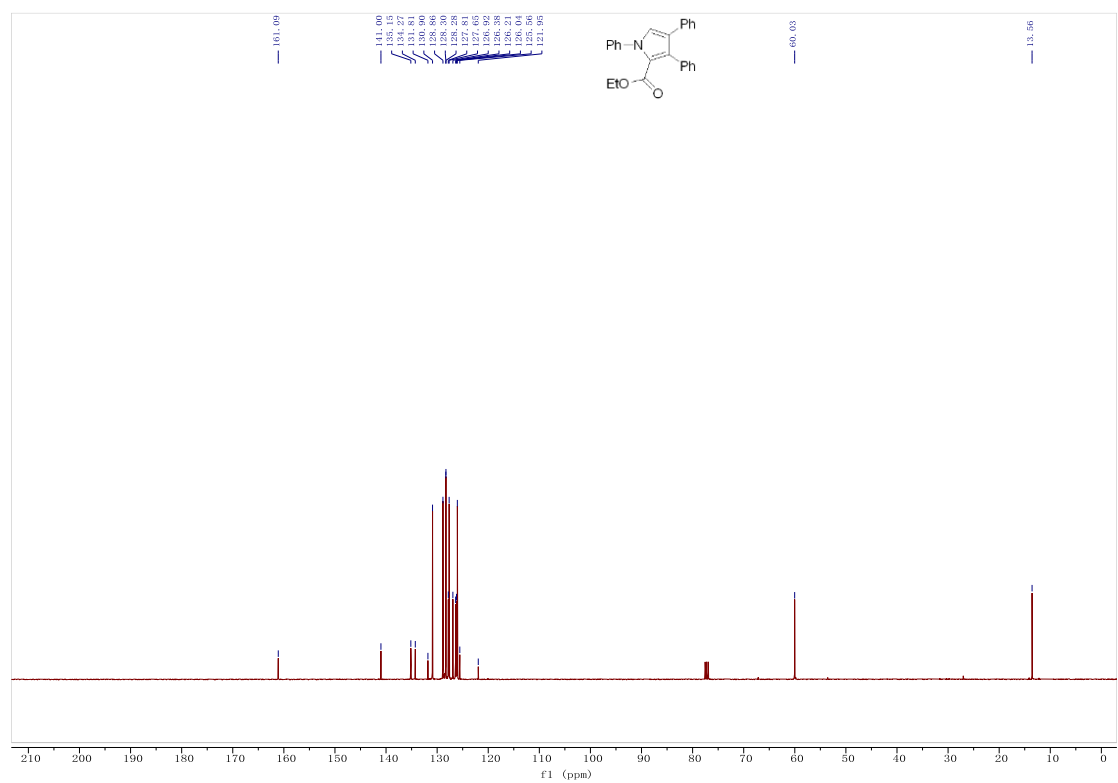

4ra

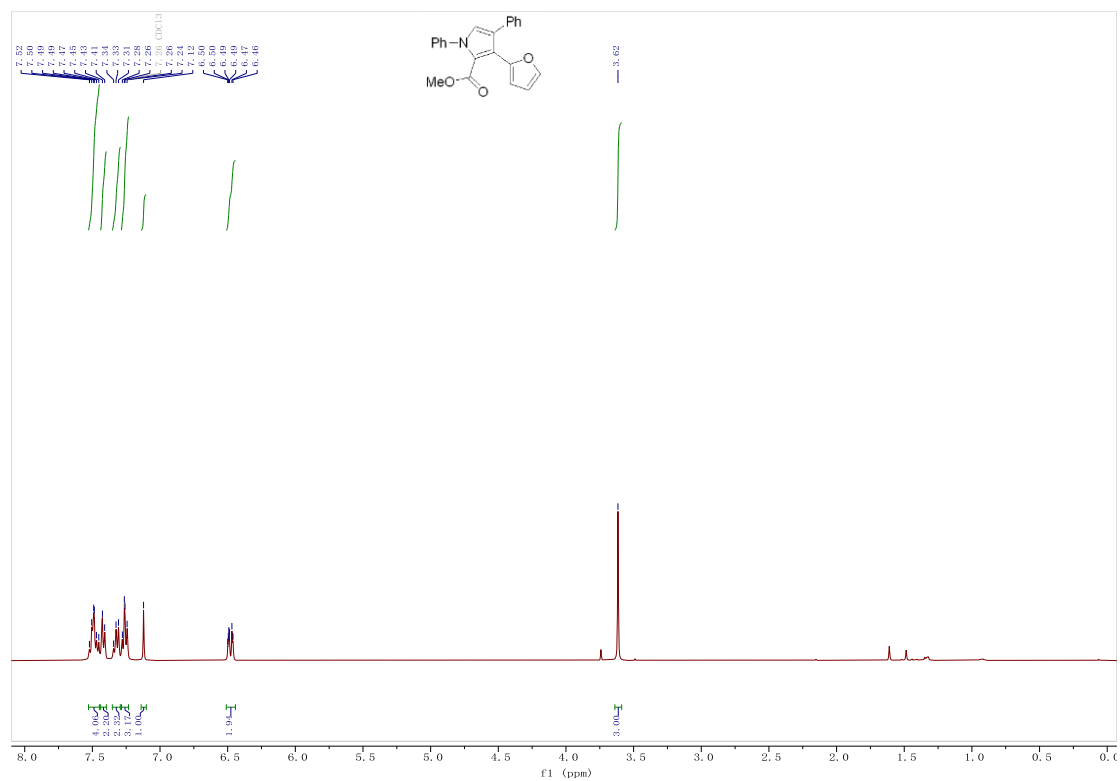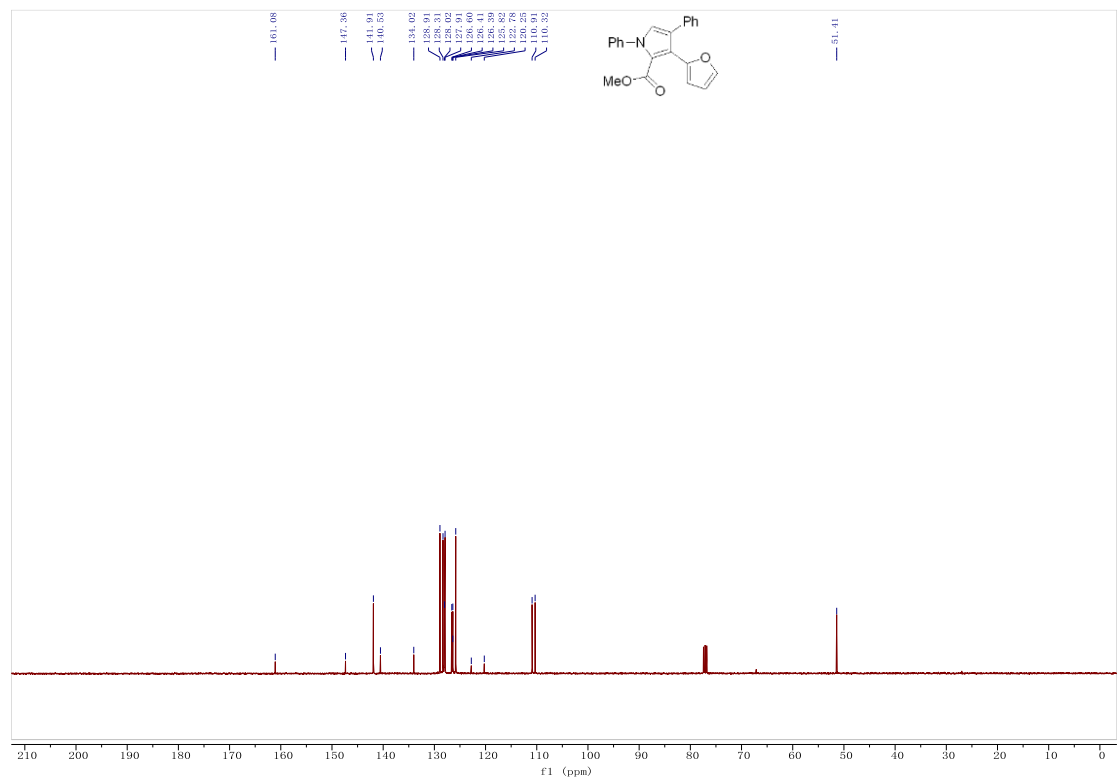

4sa

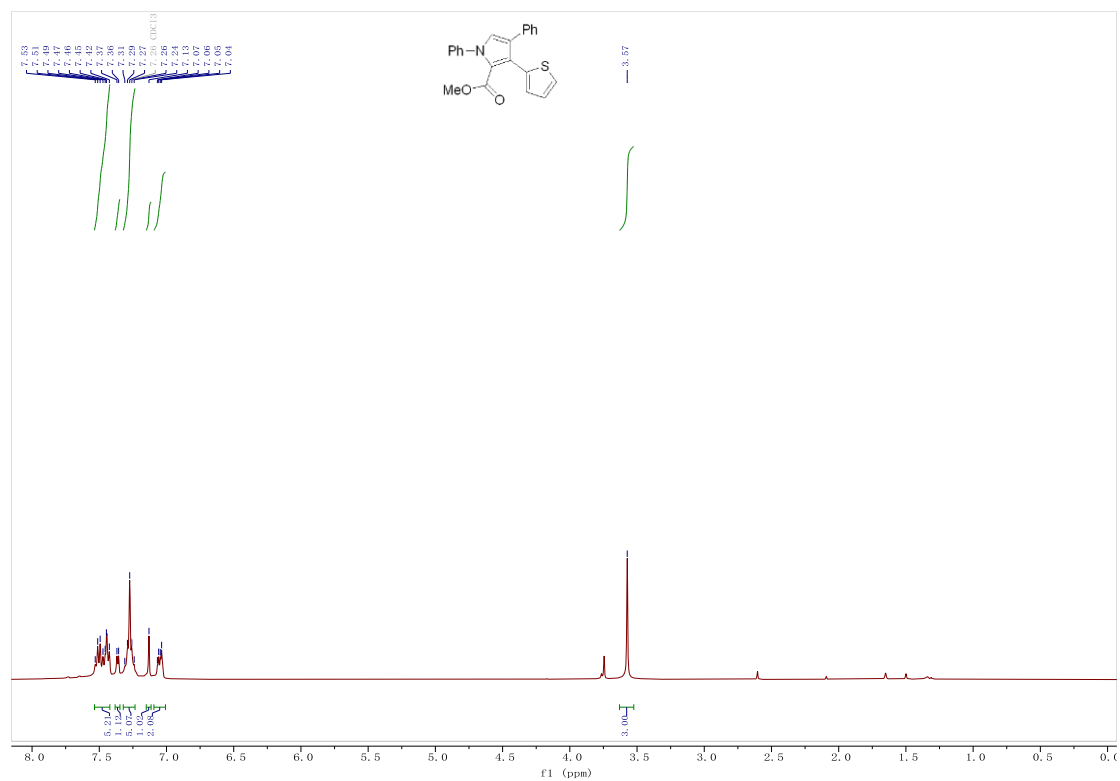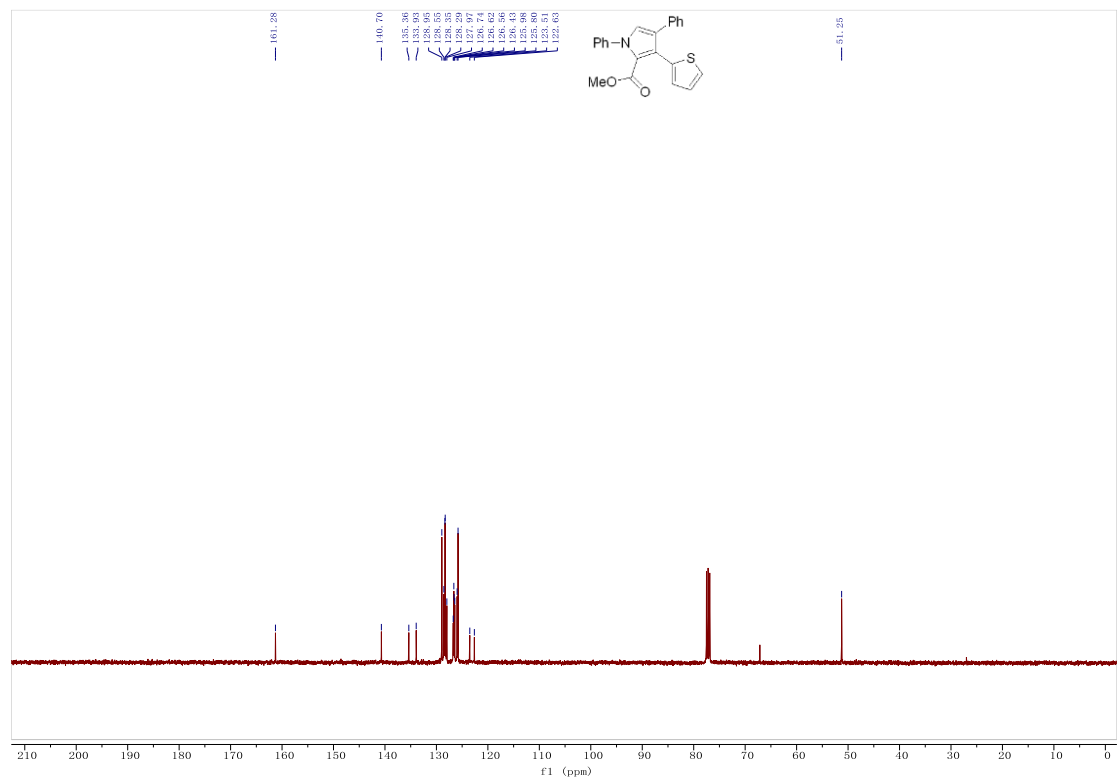

4ta

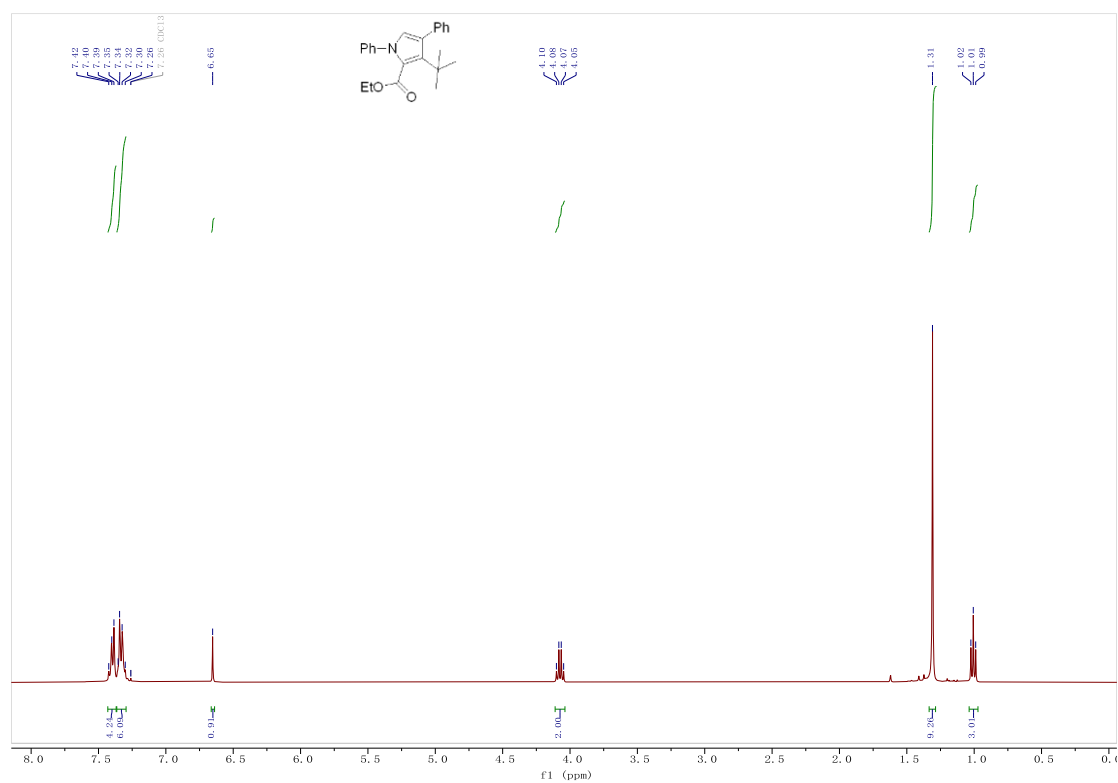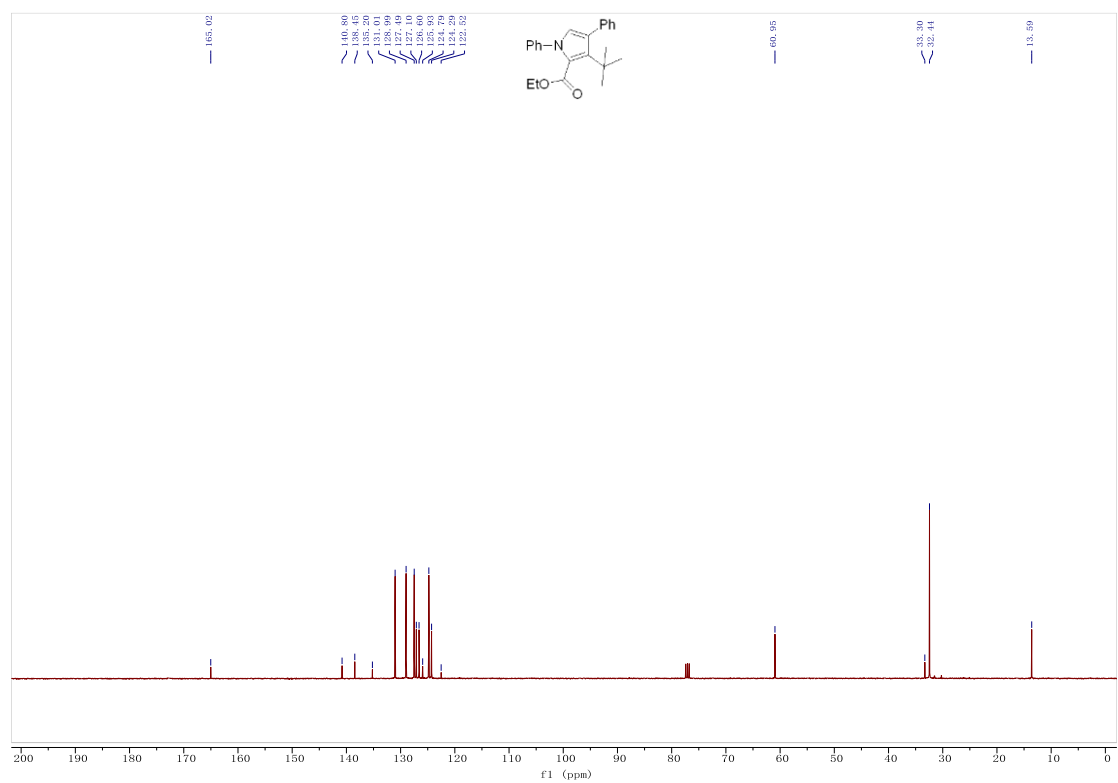



4uq

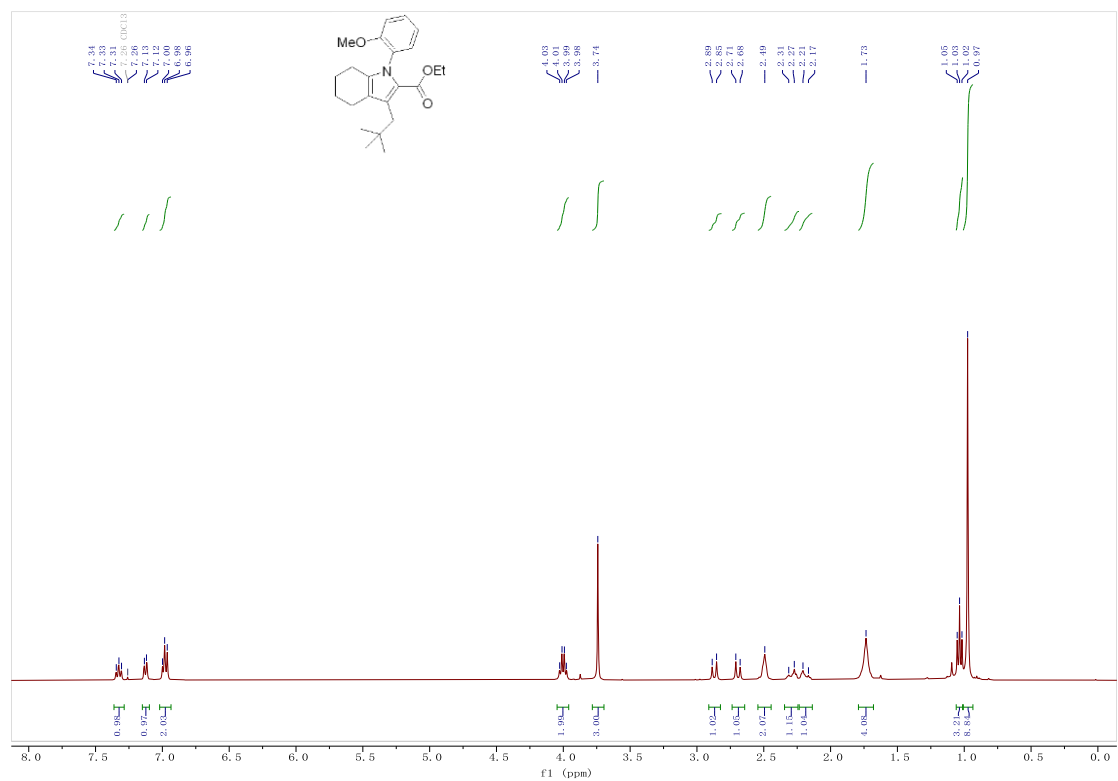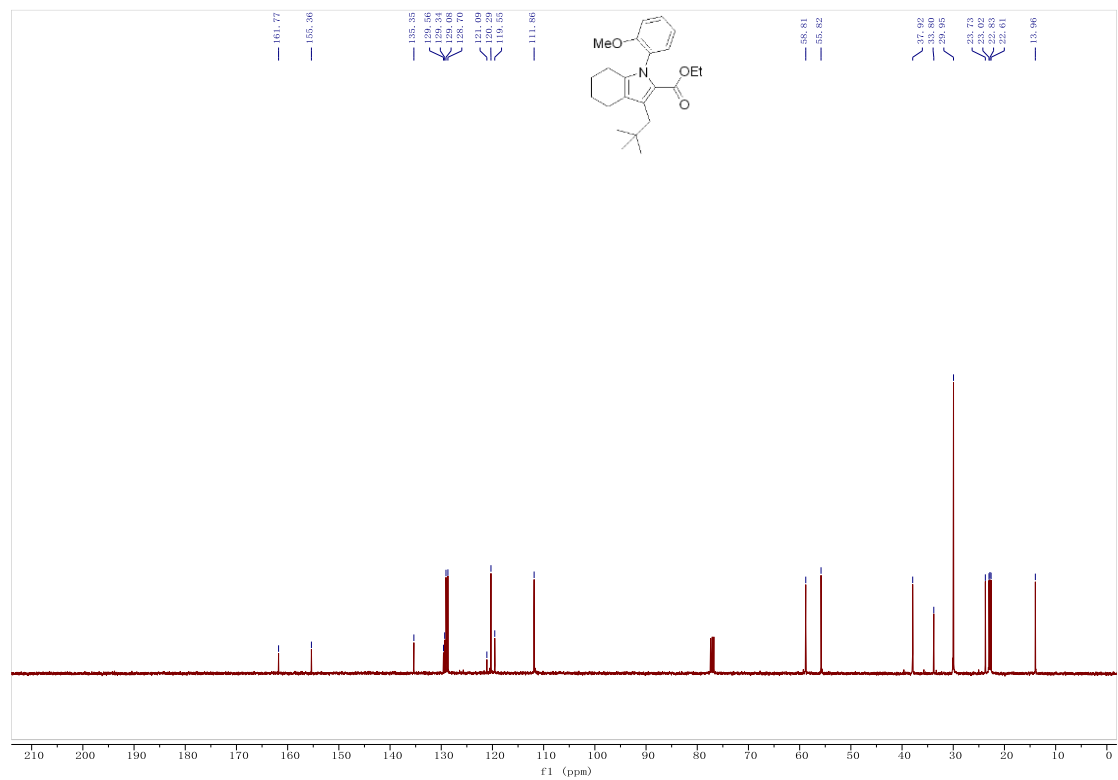

4vp

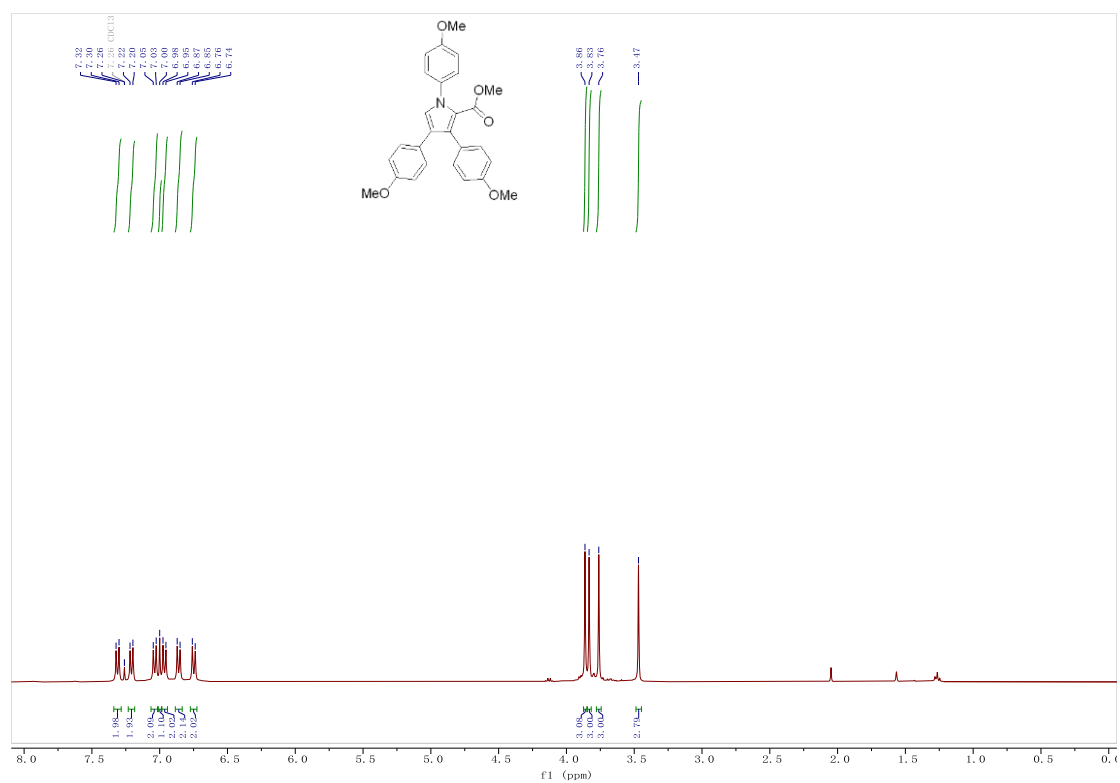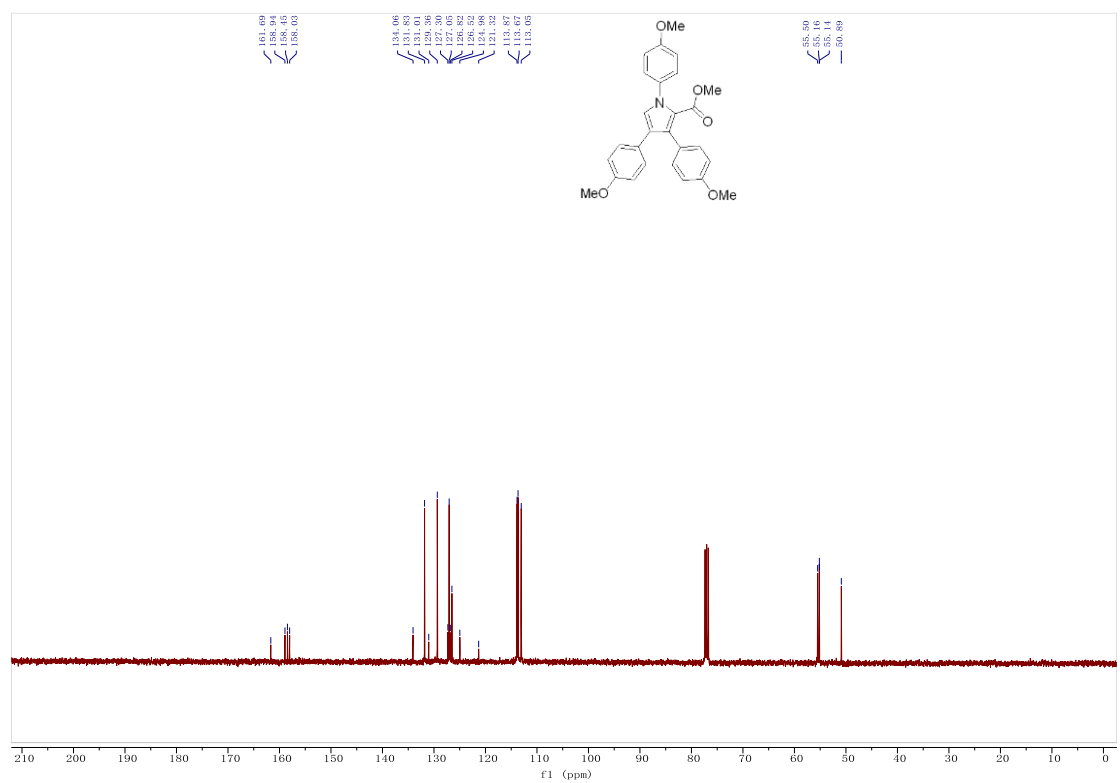

5a

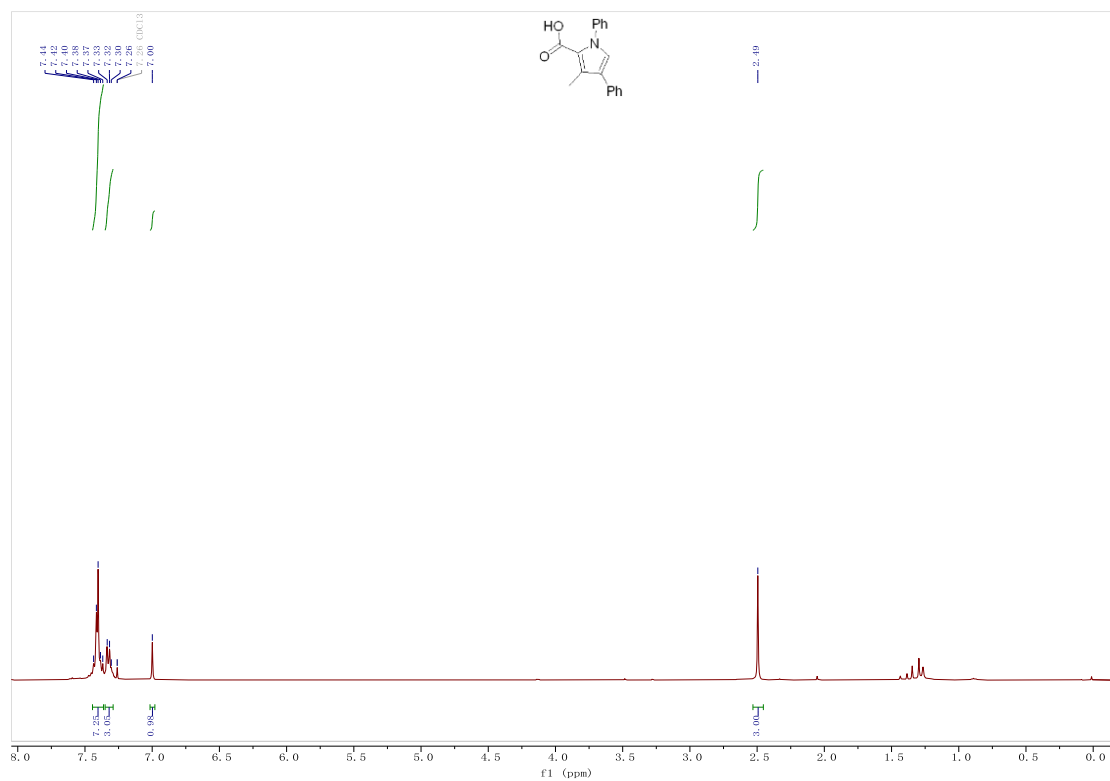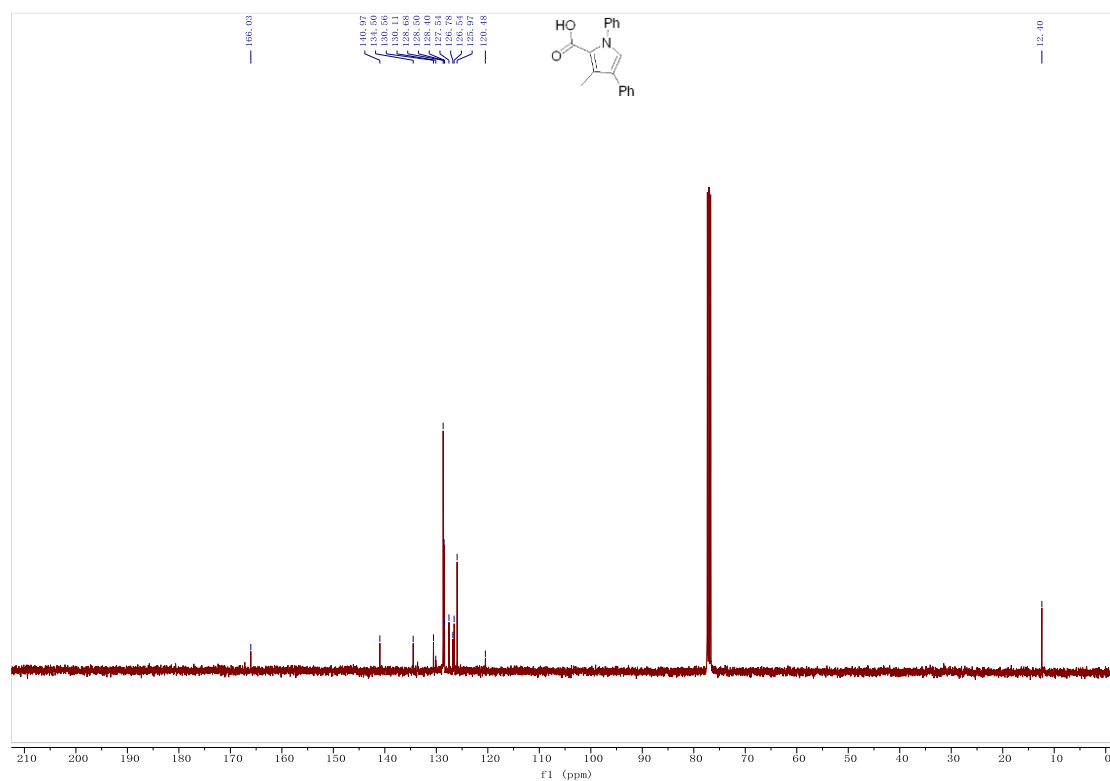

5b

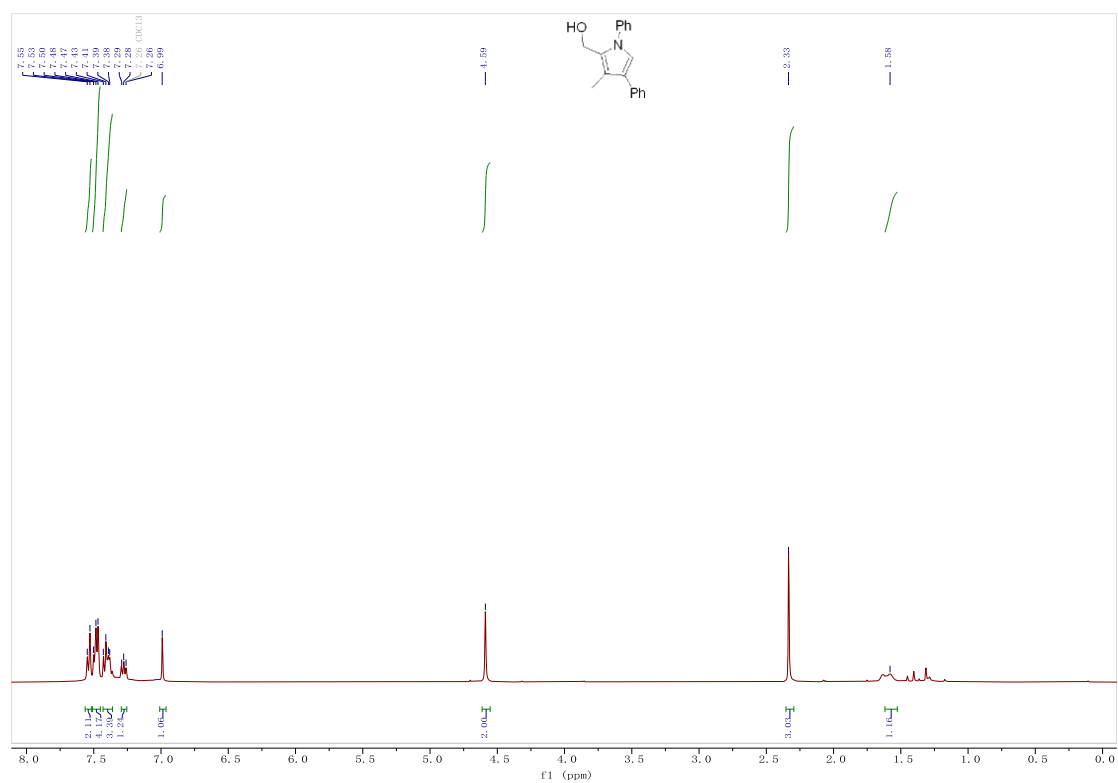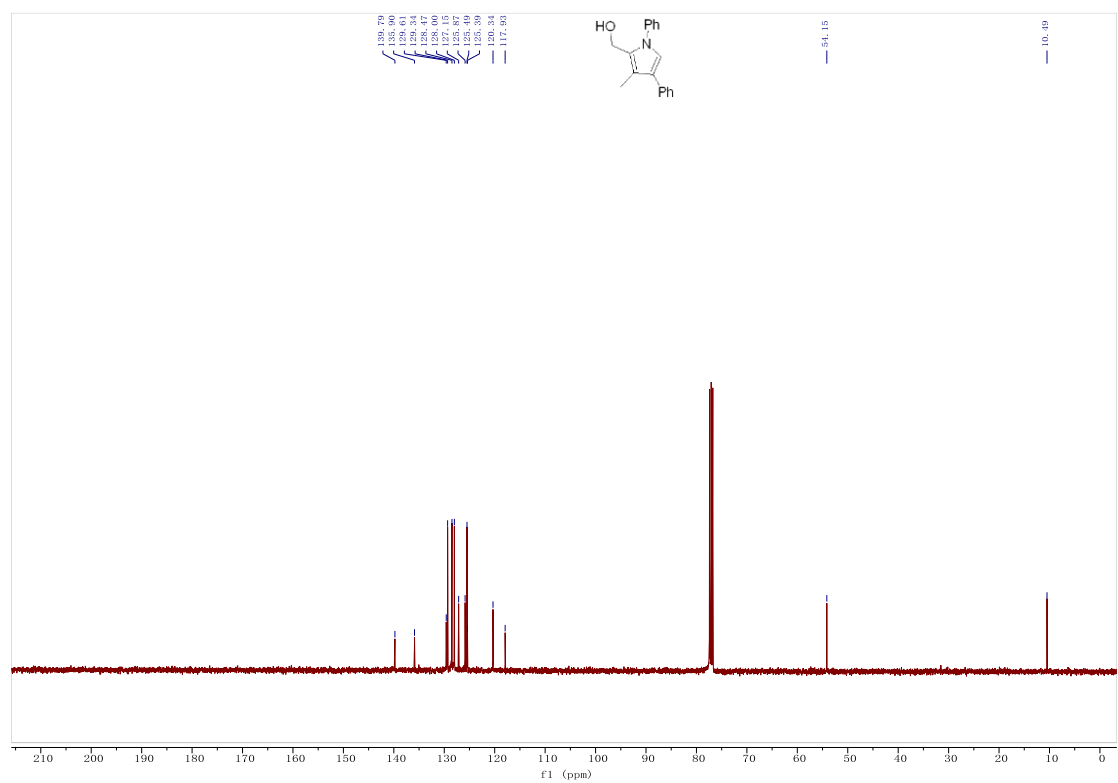

# Lamellarin R

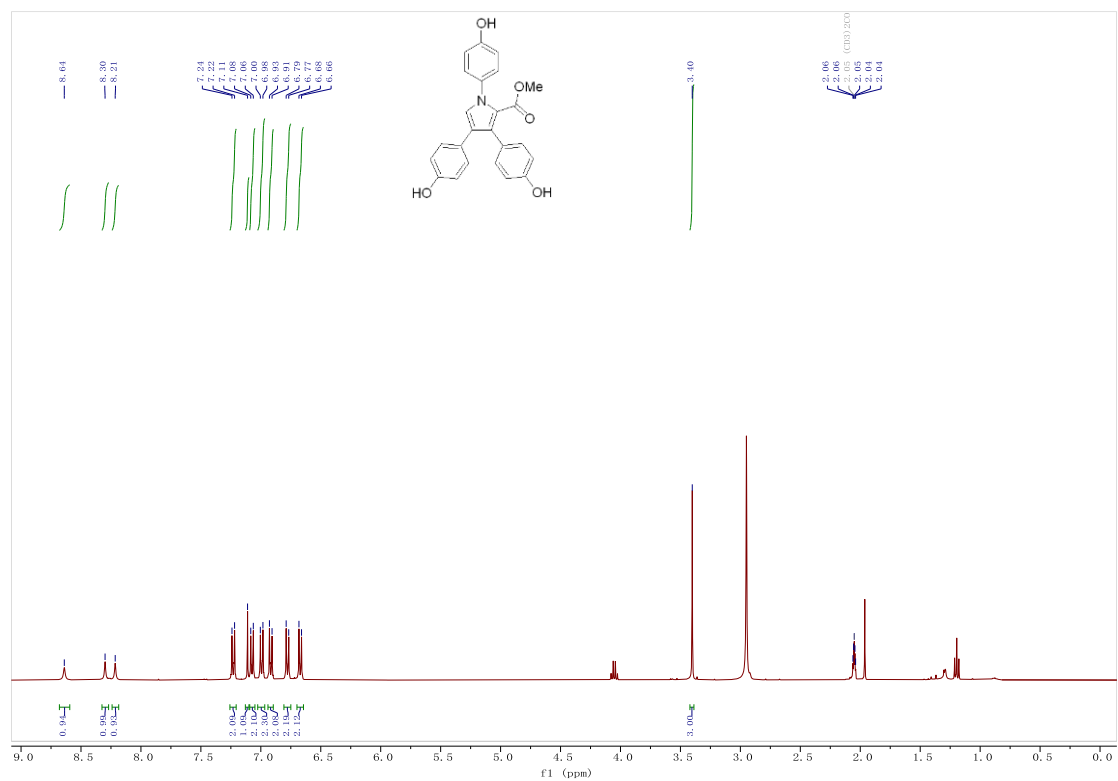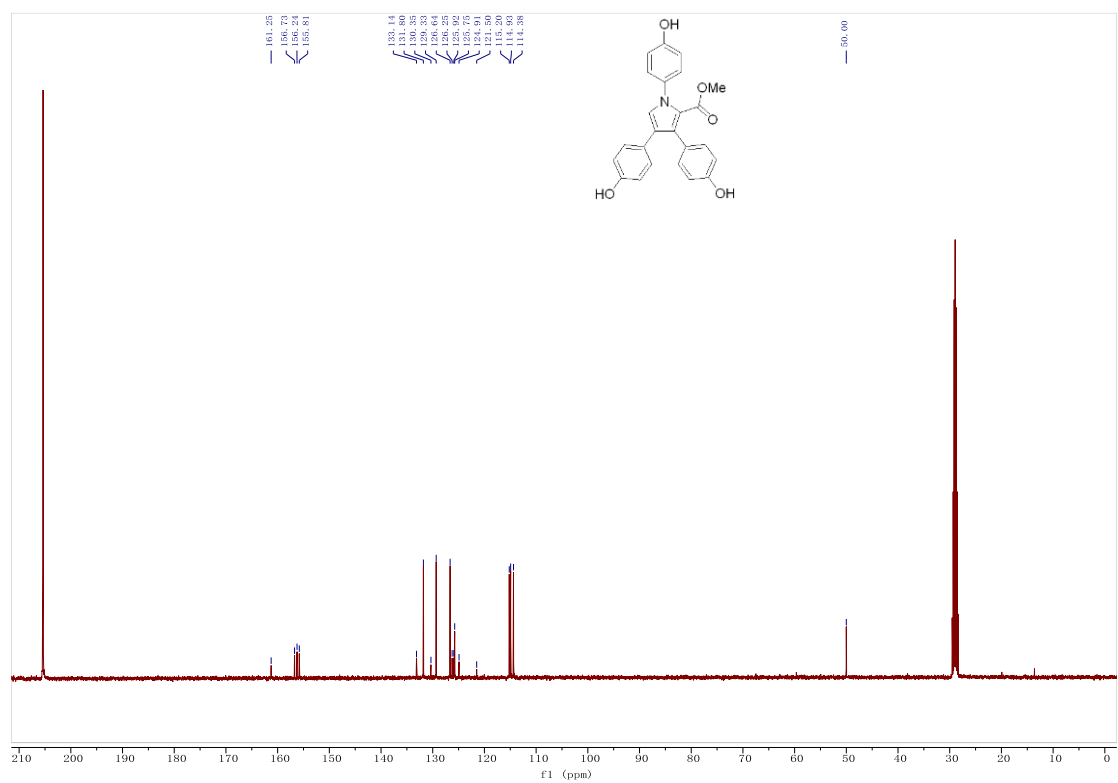

Supplement: d4qo01483a1.pdf [file d4qo01483a1.pdf]
